# Supplementary material for: Asymmetric cross Rauhut–Currier reactions of vinyl ketones with carbonylpara-quinone methidesviaphosphine catalysis
Source: Royal Society of Chemistry journal article supplement (doi:10.1039/d2qo00866a), 2022-01-01
Supplement: d2qo00866a1.pdf [file d2qo00866a1.pdf]

## Supporting Information

### **Asymmetric Cross Rauhut-Currier Reaction of Vinyl Ketones with Carbonyl *para*-Quinone Methides via Phosphine Catalysis**

Yue Lu,<sup>a</sup> Ningtao He,<sup>a</sup> Xiaohe Miao<sup>c</sup> and De Wang<sup>\*,a,b</sup>

<sup>a</sup> *Key Laboratory of Marine Drugs, Ministry of Education, School of Medicine and Pharmacy, Ocean University of China, Qingdao 266100, China.*

<sup>b</sup> *Laboratory for Marine Drugs and Bioproducts & Open Studio for Druggability Research of Marine Natural Products, Pilot National Laboratory for Marine Science and Technology, Qingdao 266237, China.*

<sup>c</sup> *Instrumentation and Service Center for Physical Sciences, Westlake University, Hangzhou 310024, China.*

*Email: [wangde@ouc.edu.cn](mailto:wangde@ouc.edu.cn)*

## **Table of Contents**

|                                                            |             |
|------------------------------------------------------------|-------------|
| <b>1. General information</b>                              | <b>S2</b>   |
| <b>2. Experimental procedure and characterization data</b> | <b>S3</b>   |
| <b>3. Synthetic applications</b>                           | <b>S66</b>  |
| <b>4. References</b>                                       | <b>S76</b>  |
| <b>5. X-ray data of compound 3e and 5</b>                  | <b>S77</b>  |
| <b>6. NMR Spectra</b>                                      | <b>S79</b>  |
| <b>7. Additives effects</b>                                | <b>S157</b> |

## **1. General Informations**

$^1\text{H}$  and  $^{13}\text{C}$  NMR spectra were recorded at 400 and 100 MHz by JEOL (7.26 ppm for  $^1\text{H}$  NMR, 77.00 ppm for  $^{13}\text{C}$  NMR as internal references when  $\text{CDCl}_3$  used), respectively. High-resolution mass spectra were recorded by ESI method. The used organic solvents were dried by standard methods if it was necessary. Optical rotations were determined at 589 nm (sodium D line) by using a Perkin-Elmer-341 MC digital polarimeter;  $[\alpha]_{\text{D}}$ -values are given in unit of  $10 \text{ deg}^{-1} \text{ cm}^2 \text{ g}^{-1}$ . Chiral HPLC was performed on a SHIMADZU LC-20AT LC System with chiral columns [Chiralpak OD-H and AD-H columns 4.6 x 250 mm, (Daicel Chemical Ind., Ltd.)]. Commercially obtained reagents were used without further purification. All these reactions were monitored by TLC with silica-gel-coated plates. Flash column chromatography was carried out by using silica gel at increased pressure.

All the racemic products were carried out with triphenylphosphine  $\text{PPh}_3$  (20 mol%) as catalyst in toluene at room temperature.

## 2. Experimental procedure and characterization data

### General procedure (I) for the synthesis of carbonyl *p*-QM (1a-1w)

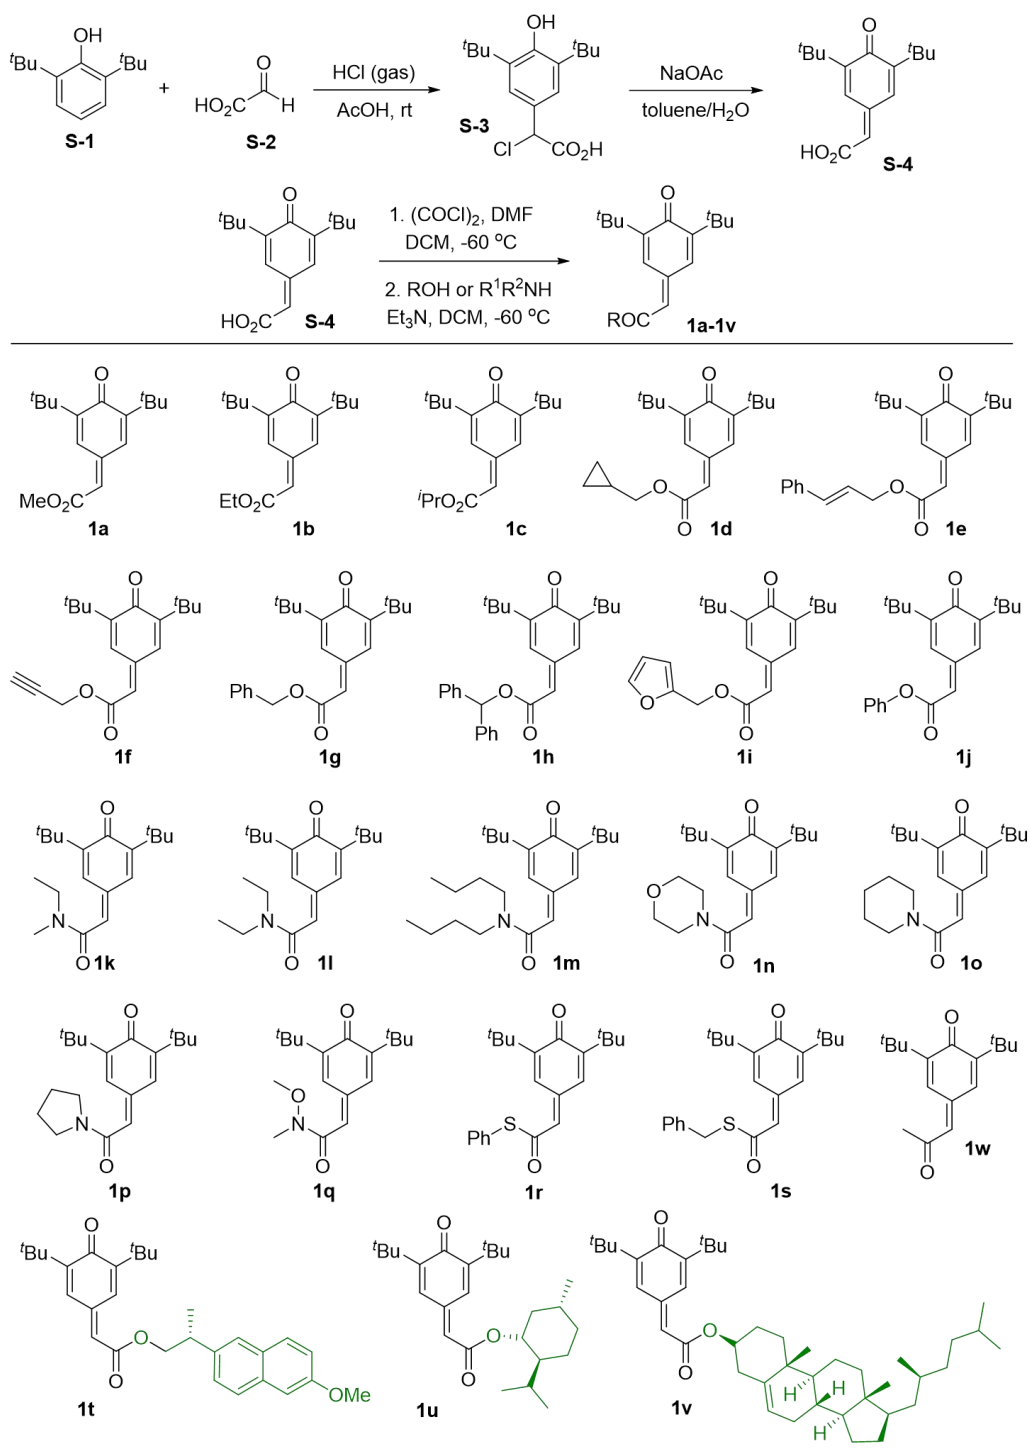

*p*-QMs were prepared according to the modified procedure of literature.<sup>[1]</sup>

**Procedure (I):** 2,6-di-tert-Butyl-phenol (S-1, 30 g, 145 mmol) and glyoxylic acid monohydrate (S-2, 28 g, 187 mmol) were dissolved in glacial acetic acid (100 mL). Gaseous HCl (6.3 g, 180 mmol, generated in situ from solid NaCl and H<sub>2</sub>SO<sub>4</sub>)

of were then bubbled into the reaction mixture with stirring and cooling in an ice bath over a period of 3 hrs, keeping the temperature between 0-10 °C. The mixture was then stirred at room temperature overnight. The precipitated white solid was isolated by filtration and washed with 50 mL H<sub>2</sub>O, giving the yellowish and wet cake of the chloride compound (**S-3**, 35 g). This material was used directly for the next step without purification. **S-3** (10 g) dissolved in toluene, a solution of NaOAc (5.5 g, 67 mmol) in water was injected to the above solvent, the mixture stirred at room temperature for 3 hours. The precipitated orange solid was isolated by filtration, washed with H<sub>2</sub>O and cold ethanol sequentially, evacuate to remove the residue organic solvent to give the dry orange solid compound (**S-4**, 5.4 g, 61% yield), **S-4** was used directly without any purification.

Compound **S-4** (5 mmol) was dissolved in dry DCM (15 mL) under argon. A few drops of DMF were added, followed by the dropwise addition of oxalyl chloride (5 mmol) slowly. Stirring at room temperature to ensure full conversion to the acetyl chloride. A solution of alcohol (1.5 equiv.), thiol (1.5 equiv.) or amine (1.5 equiv.) and triethylamine (1.0 equiv) in 15 mL of anhydrous DCM was cooled to -70 °C to -60 °C under nitrogen atmosphere. The solution of the acetyl chloride was added dropwise while maintaining the temperature at -70 °C to -60 °C. After stirring at this temperature for another 20 min, the reaction mixture was allowed to warm to room temperature for a full conversion. The filtrate was concentrated under reduced pressure. The residue was purified by 300 mesh silica gel column chromatography to give the corresponding product **1**.

Compounds **1a-1c**, **1g**, **1l-1p** and **1w** were known compounds. The spectra data were correspondence with the literature data.<sup>[1]</sup>

**Cyclopropylmethyl 2-(3,5-di-*tert*-butyl-4-oxocyclohexa-2,5-dien-1-ylidene)acetate (1d).**



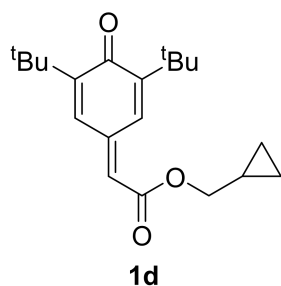

Compound **1d** (609.4 mg, 47% yield) was obtained as a orange solid following the *general procedure I* from **S-4** (4.1 mmol, 1.08 g) and cyclopropylmethanol (6.0 mmol, 0.49 mL); **Mp**: 68-69 °C; **<sup>1</sup>H NMR** (400 MHz, CDCl<sub>3</sub>) δ 8.29 (d, *J* = 2.4 Hz, 1H), 6.79 (d, *J* = 2.0 Hz, 1H), 6.18 (s, 1H), 4.04 (d, *J* = 7.2 Hz, 2H), 1.30 (s, 9H), 1.28 (s, 9H), 1.24-1.14 (m, 1H), 0.63-0.59 (m, 2H), 0.34-0.30 (m, 2H); **<sup>13</sup>C NMR** (100 MHz, CDCl<sub>3</sub>) δ 186.7, 165.9, 151.3, 151.1, 142.1, 133.6, 127.2, 125.8, 69.7, 35.7, 35.2, 29.5, 29.4, 9.8, 3.4; **HRMS** Calcd. For C<sub>20</sub>H<sub>29</sub>O<sub>3</sub><sup>+</sup> [M+H]<sup>+</sup>: 317.2117, found: 317.2118.

#### Cinnamyl 2-(3,5-di-*tert*-butyl-4-oxocyclohexa-2,5-dien-1-ylidene)acetate (**1e**)

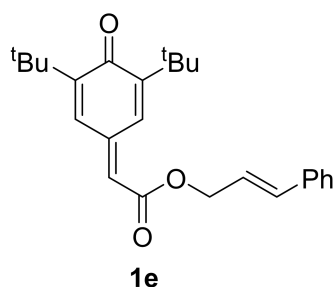

Compound **1e** (206 mg, 27% yield) was obtained as a orange liquid following the *general procedure I* from **S-4** (2.0 mmol, 0.52 g) and cinnamyl alcohol (3.0 mmol, 0.39 ml); **<sup>1</sup>H NMR** (400 MHz, CDCl<sub>3</sub>) δ 8.32 (d, *J* = 2.4 Hz, 1H), 7.42-7.27 (m, 5H), 6.79 (d, *J* = 2.4 Hz, 1H), 6.73-6.67 (m, 1H), 6.38-6.31 (m, 1H), 6.19 (s, 1H), 4.88 (dd, *J* = 6.4, 1.6 Hz, 1H), 1.31 (s, 9H), 1.29 (s, 9H); **<sup>13</sup>C NMR** (100 MHz, CDCl<sub>3</sub>) δ 186.6, 165.4, 151.4, 151.2, 142.6, 136.0, 134.5, 133.5, 128.6, 128.1, 127.0, 126.6, 125.2, 122.6, 65.3, 35.7, 35.2, 29.5, 29.4; **HRMS** Calcd. For C<sub>25</sub>H<sub>29</sub>O<sub>3</sub><sup>-</sup> [M-H]<sup>-</sup>: 377.2117, found: 377.2108.

#### Prop-2-yn-1-yl 2-(3,5-di-*tert*-butyl-4-oxocyclohexa-2,5-dien-1-ylidene)acetate (**1f**)

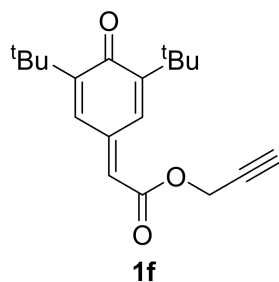

Compound **1f** (238.9 mg, 40% yield) was obtained as a orange solid following the *general procedure I* from **S-4** (2.0 mmol, 0.52 g) and propargyl alcohol (3.0 mmol, 0.18 ml); **Mp**: 69-71 °C; **<sup>1</sup>H NMR** (400 MHz, CDCl<sub>3</sub>) δ 8.26 (d, *J* = 2.4 Hz, 1H), 6.77 (d, *J* = 2.4 Hz, 1H), 6.15 (s, 1H), 4.80 (dd, *J* = 2.8, 0.8 Hz, 2H), 2.51 (td, *J* = 2.8, 0.8 Hz, 1H), 1.29 (d, *J* = 0.8 Hz, 9H), 1.27 (d, *J* = 0.8 Hz, 9H); **<sup>13</sup>C NMR** (100 MHz, CDCl<sub>3</sub>) δ 186.6, 164.8, 151.8, 151.5, 143.4, 133.3, 126.9, 123.9, 75.2, 52.2, 35.7, 35.3, 29.5, 29.4; **HRMS** Calcd. For C<sub>19</sub>H<sub>25</sub>O<sub>3</sub><sup>+</sup> [M+H]<sup>+</sup>: 301.1804, found: 301.1805.

**Benzhydryl 2-(3,5-di-*tert*-butyl-4-oxocyclohexa-2,5-dien-1-ylidene)acetate (1h).**

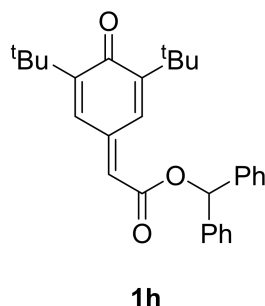

Compound **1h** (174.0 mg, 41% yield) was obtained as a orange solid following the *general procedure I* from **S-4** (1.0 mmol, 0.26 g) and diphenylmethanol (1.5 mmol, 280.0 mg); **Mp**: 88-90 °C; **<sup>1</sup>H NMR** (400 MHz, CDCl<sub>3</sub>) δ 8.29 (d, *J* = 2.0 Hz, 1H), 7.38-7.31 (m, 10H), 7.03 (s, 1H), 6.82 (d, *J* = 2.0 Hz, 1H), 6.32 (s, 1H), 1.30 (s, 9H), 1.29 (s, 9H); **<sup>13</sup>C NMR** (100 MHz, CDCl<sub>3</sub>) δ 186.6, 164.7, 151.6, 151.3, 142.9, 142.2, 139.8, 133.5, 128.6, 128.3, 128.1, 127.4, 127.2, 127.1, 127.0, 125.2, 79.9, 35.7, 35.3, 29.5, 29.4; **HRMS** Calcd. For C<sub>29</sub>H<sub>33</sub>O<sub>3</sub><sup>+</sup> [M+H]<sup>+</sup>: 429.2430, found: 429.2432.

**Furan-2-ylmethyl 2-(3,5-di-*tert*-butyl-4-oxocyclohexa-2,5-dien-1-ylidene)acetate (1i).**

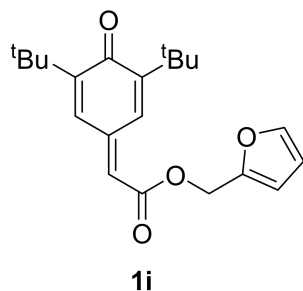

Compound **1i** (131.1 mg, 38% yield) was obtained as a red liquid following the *general procedure I* from **S-4** (1.0 mmol, 0.26 g) and furan-2-ylmethanol (1.5 mmol, 0.13 ml);  $^1\text{H NMR}$  (400 MHz,  $\text{CDCl}_3$ )  $\delta$  8.25 (d,  $J = 2.0$  Hz, 1H), 7.44-7.43 (m, 1H), 6.75 (d,  $J = 2.4$  Hz, 1H), 6.47-6.45 (m, 1H), 6.39-6.37 (m, 1H), 6.14 (s, 1H), 5.19 (s, 2H), 1.28 (s, 9H), 1.26 (s, 9H);  $^{13}\text{C NMR}$  (100 MHz,  $\text{CDCl}_3$ )  $\delta$  186.6, 165.3, 151.5, 151.3, 149.0, 143.5, 142.8, 133.5, 127.0, 124.9, 110.9, 110.6, 58.3, 35.7, 35.3, 29.5, 29.4; **HRMS** Calcd. For  $\text{C}_{21}\text{H}_{27}\text{O}_4^+$   $[\text{M}+\text{H}]^+$ : 343.1909, found: 343.1909.

#### Phenyl 2-(3,5-di-tert-butyl-4-oxocyclohexa-2,5-dien-1-ylidene)acetate (**1j**)

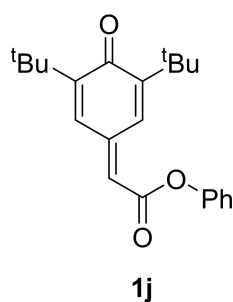

Compound **1j** (57.0 mg, 17% yield) was obtained as a orange solid following the *general procedure I* from **S-4** (1.0 mmol, 0.26 g) and phenol (1.5 mmol, 0.15 g); **Mp**: 88-90 °C;  $^1\text{H NMR}$  (400 MHz,  $\text{CDCl}_3$ )  $\delta$  8.36 (d,  $J = 2.4$  Hz, 1H), 7.45-7.41 (m, 2H), 7.30-7.28 (m, 1H), 7.17-7.15 (m, 2H), 6.87 (d,  $J = 2.0$  Hz, 1H), 6.37 (s, 1H), 1.31 (s, 9H), 1.30 (s, 9H);  $^{13}\text{C NMR}$  (100 MHz,  $\text{CDCl}_3$ )  $\delta$  186.6, 164.3, 152.0, 151.6, 150.3, 144.2, 133.3, 129.5, 126.9, 126.1, 124.0, 121.5, 35.8, 35.3, 29.50, 29.47; **HRMS** Calcd. For  $\text{C}_{22}\text{H}_{27}\text{O}_3^+$   $[\text{M}+\text{H}]^+$ : 339.1960, found: 339.1961.

#### 2-(3,5-di-tert-butyl-4-oxocyclohexa-2,5-dien-1-ylidene)-N-ethyl-N-methylacetamide (**1k**)

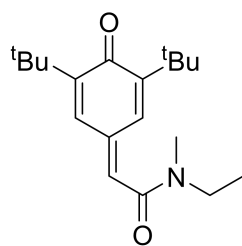

**1k**

Compound **1k** (292.0 mg, 48% yield) was obtained as a yellow solid following the *general procedure I* from **S-4** (2.0 mmol, 0.52 g) and *N*-methylethanamine (3.0 mmol, 0.26 ml); **Mp**: 97-100 °C;  $^1\text{H NMR}$  (400 MHz,  $\text{CDCl}_3$ )  $\delta$  7.57-7.50 (m, 1H), 6.81 (s, 1H), 6.48 (s, 1H), 3.53 (q,  $J = 7.2$  Hz, 1H), 3.40 (q,  $J = 7.2$  Hz, 1H), 3.03 (s, 3H), 1.26 (s, 18H), 1.19 (t,  $J = 7.2$  Hz, 3H);  $^{13}\text{C NMR}$  (100 MHz,  $\text{CDCl}_3$ )  $\delta$  186.5, 186.4, 165.8, 165.7, 150.13, 150.09, 149.7, 137.1, 136.4, 133.34, 133.27, 130.8, 130.3, 127.8, 127.7, 45.2, 42.1, 35.5, 35.37, 35.35, 35.1, 32.3, 29.40, 29.38, 13.7, 12.2; **HRMS** Calcd. For  $\text{C}_{19}\text{H}_{30}\text{NO}_2^+$   $[\text{M}+\text{H}]^+$ : 304.2277, found: 304.2276.

**2-(3,5-di-*tert*-butyl-4-oxocyclohexa-2,5-dien-1-ylidene)-*N*-methoxy-*N*-methylethanamide (1q)**

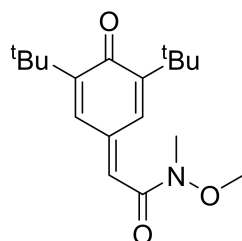

**1q**

Compound **1q** (281.6 mg, 92% yield) was obtained as a yellow solid following the *general procedure I* from **S-4** (1.0 mmol, 0.26 g) and *N,O*-dimethylhydroxylamine (1.5 mmol, 0.14 mL); **Mp**: 108-110 °C;  $^1\text{H NMR}$  (400 MHz,  $\text{CDCl}_3$ )  $\delta$  8.26 (s, 1H), 6.82 (s, 1H), 6.65 (s, 1H), 3.75 (s, 3H), 3.30 (s, 3H), 1.29 (s, 9H), 1.28 (s, 9H);  $^{13}\text{C NMR}$  (100 MHz,  $\text{CDCl}_3$ )  $\delta$  186.7, 166.1, 150.8, 150.5, 140.7, 134.1, 127.8, 124.7, 62.1, 35.6, 35.2, 32.3, 29.52, 29.48; **HRMS** Calcd. For  $\text{C}_{18}\text{H}_{28}\text{NO}_3^+$   $[\text{M}+\text{H}]^+$ : 306.2069, found: 306.2067.

### **S-phenyl 2-(3,5-di-*tert*-butyl-4-oxocyclohexa-2,5-dien-1-ylidene)ethanethioate**

**(1r)**

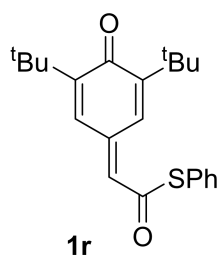

Compound **1r** (18.2 mg, 5% yield) was obtained as a orange solid following the *general procedure I* from **S-4** (1.0 mmol, 262 mg) and thiophenol (1.5 mmol, 0.15 mL); **Mp**: 97-99 °C; **<sup>1</sup>H NMR** (400 MHz, CDCl<sub>3</sub>) δ 8.12 (d, *J* = 2.0 Hz, 1H), 7.47 (s, 5H), 6.76 (d, *J* = 2.4 Hz, 1H), 6.39 (s, 1H), 1.29 (s, 9H), 1.25 (s, 9H); **<sup>13</sup>C NMR** (100 MHz, CDCl<sub>3</sub>) δ 187.7, 186.6, 152.7, 152.4, 139.9, 134.4, 133.3, 129.9, 129.5, 129.4, 127.7, 127.4, 35.7, 35.5, 29.54, 29.47; **HRMS** Calcd. For C<sub>22</sub>H<sub>25</sub>O<sub>2</sub>S<sup>-</sup> [M-H]<sup>-</sup>: 353.1575, found: 353.1588.

### **S-benzyl 2-(3,5-di-*tert*-butyl-4-oxocyclohexa-2,5-dien-1-ylidene)ethanethioate (1s)**

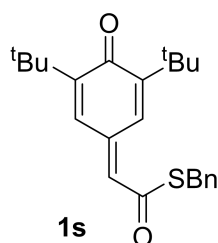

Compound **1s** (72.9 mg, 10% yield) was obtained as a orange solid following the *general procedure I* from **S-4** (2.0 mmol, 0.52 g) and benzyl mercaptan (3.0 mmol, 0.35 ml); **Mp**: 51-53 °C; **<sup>1</sup>H NMR** (400 MHz, CDCl<sub>3</sub>) δ 8.19 (s, 1H), 7.35-7.30 (m, 5H), 6.72 (s, 1H), 6.29 (s, 1H), 4.27 (s, 2H), 1.31 (s, 9H), 1.28 (s, 9H); **<sup>13</sup>C NMR** (100 MHz, CDCl<sub>3</sub>) 188.7, 186.5, 152.4, 152.2, 139.1, 136.9, 133.4, 130.0, 128.9, 128.7, 127.8, 127.5, 35.7, 35.4, 33.9, 29.53, 29.45; **HRMS** Calcd. For C<sub>23</sub>H<sub>29</sub>O<sub>2</sub>S<sup>+</sup> [M+H]<sup>+</sup>: 369.1888, found: 369.1877.

### **(R)-2-(6-methoxynaphthalen-2-yl)propyl**

### **2-(3,5-di-*tert*-butyl-4-oxocyclohexa-2,5-dien-1-ylidene)acetate (1t)**

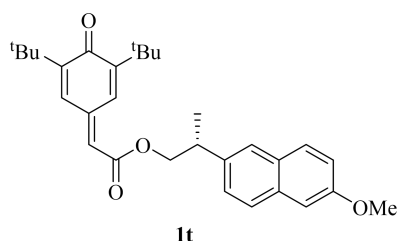

Compound **1t** (265.8 mg, 58% yield) was obtained as a orange solid following the *general procedure I* from **S-4** (1.0 mmol, 0.26 g) and (*R*)-2-(6-methoxynaphthalen-2-yl)propan-1-ol (1.5 mmol, 0.32 g); **Mp**: 149-151 °C; **<sup>1</sup>H NMR** (400 MHz, CDCl<sub>3</sub>) δ 8.24 (dd, *J* = 2.4, 0.8 Hz, 1H), 7.72-7.69 (m, 2H), 7.61 (d, *J* = 1.2 Hz, 1H), 7.36 (dd, *J* = 8.4, 2.0 Hz, 1H), 7.16-7.12 (m, 2H), 6.75 (dd, *J* = 2.4, 0.8 Hz, 1H), 6.10-6.09 (m, 1H), 4.44-4.34 (m, 2H), 3.92 (s, 3H), 3.35-3.26 (m, 1H), 1.42 (d, *J* = 7.2 Hz, 3H), 1.28 (s, 9H), 1.26 (s, 9H); **<sup>13</sup>C NMR** (100 MHz, CDCl<sub>3</sub>) δ 186.7, 165.7, 157.4, 151.4, 151.1, 142.5, 138.0, 133.6, 133.5, 129.1, 128.9, 127.0, 126.2, 125.5, 125.4, 118.9, 105.5, 69.6, 55.3, 38.8, 35.6, 35.2, 29.5, 29.4, 18.3; **HRMS** Calcd. For C<sub>30</sub>H<sub>37</sub>O<sub>4</sub><sup>+</sup> [M+H]<sup>+</sup>: 461.2692, found: 461.2694.

### (1*R*,2*S*,5*R*)-2-isopropyl-5-methylcyclohexyl

#### 2-(3,5-di-*tert*-butyl-4-oxocyclohexa-2,5-dien-1-ylidene)acetate (**1u**)

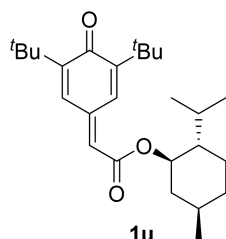

Compound **1u** (257.2 mg, 64% yield) was obtained as a orange liquid following the *general procedure I* from **S-4** (1.0 mmol, 0.26 g) and *L*-menthol (1.5 mmol, 0.24 g); **<sup>1</sup>H NMR** (400 MHz, CDCl<sub>3</sub>) δ 8.30 (s, 1H), 6.78 (s, 1H), 6.15 (s, 1H), 4.81 (td, *J* = 11.2, 4.4 Hz, 1H), 2.07 (d, *J* = 12.0 Hz, 1H), 1.94-1.87 (m, 1H), 1.70 (d, *J* = 10.8 Hz, 2H), 1.55-1.41 (m, 2H), 1.30 (s, 9H), 1.27 (s, 9H), 1.14-0.98 (m, 2H), 0.91 (t, *J* = 7.6 Hz, 6H), 0.78 (d, *J* = 7.2 Hz, 3H); **<sup>13</sup>C NMR** (100 MHz, CDCl<sub>3</sub>) δ 186.7, 165.4, 151.3, 151.0, 142.0, 133.7, 127.2, 126.4, 74.9, 47.1, 41.0, 35.7, 35.2, 34.2, 31.4, 29.53, 29.46, 26.3, 23.5, 22.0, 20.7, 16.4; **HRMS** Calcd. For C<sub>26</sub>H<sub>41</sub>O<sub>3</sub><sup>+</sup> [M+H]<sup>+</sup>: 401.3056, found: 401.3055.

**(2*S*,8*S*,9*S*,10*R*,13*R*,14*S*,17*S*)-17-((*S*)-2,5-dimethylhexyl)-10,13-dimethyl-2,3,4,7,8,9,10,11,12,13,14,15,16,17-tetradecahydro-1*H*-cyclopenta[*a*]phenanthren-2-yl 2-(3,5-di-*tert*-butyl-4-oxocyclohexa-2,5-dien-1-ylidene)acetate (1v)**

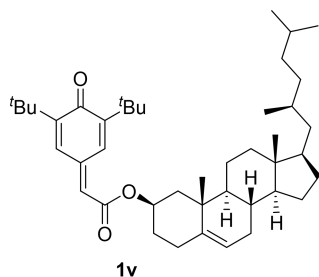

Compound **1v** (409.9 mg, 65% yield) was obtained as a orange solid following the *general procedure I* from **S-4** (1.0 mmol, 0.26 g) and Cholesterol (1.5 mmol, 0.58 g); **Mp**: 72-74 °C; **<sup>1</sup>H NMR** (400 MHz, CDCl<sub>3</sub>) δ 8.28 (s, 1H), 6.78 (s, 1H), 6.13 (s, 1H), 5.41 (d, *J* = 4.0 Hz, 1H), 4.79-4.71 (m, 1H), 2.40-2.35 (m, 2H), 2.03-1.96 (m, 2H), 1.95-1.88 (m, 2H), 1.86-1.79 (m, 1H), 1.71-1.64 (m, 1H), 1.57-1.55 (m, 1H), 1.53-1.50 (m, 2H), 1.48-1.43 (m, 2H), 1.41-1.33 (m, 4H), 1.30 (s, 9H), 1.28 (s, 9H), 1.21-1.06 (m, 8H), 1.04 (s, 3H), 1.02-0.94 (m, 3H), 0.92 (d, *J* = 6.8 Hz, 3H), 0.86 (dd, *J* = 6.8, 1.6 Hz, 6H), 0.68 (s, 3H); **<sup>13</sup>C NMR** (100 MHz, CDCl<sub>3</sub>) 186.7, 165.2, 151.2, 151.0, 141.9, 139.3, 133.7, 127.2, 126.4, 123.0, 74.6, 56.7, 56.1, 50.0, 42.3, 39.7, 39.5, 38.2, 37.0, 36.6, 36.2, 35.8, 35.7, 35.2, 31.9, 31.8, 29.53, 29.46, 28.2, 28.0, 27.9, 24.3, 23.8, 22.8, 22.6, 21.0, 19.3, 18.7, 11.9; **HRMS** Calcd. For C<sub>43</sub>H<sub>67</sub>O<sub>3</sub><sup>+</sup> [M+H]<sup>+</sup>: 631.5090, found: 631.5091.

**General procedure (II) for the synthesis of chiral phosphines.**

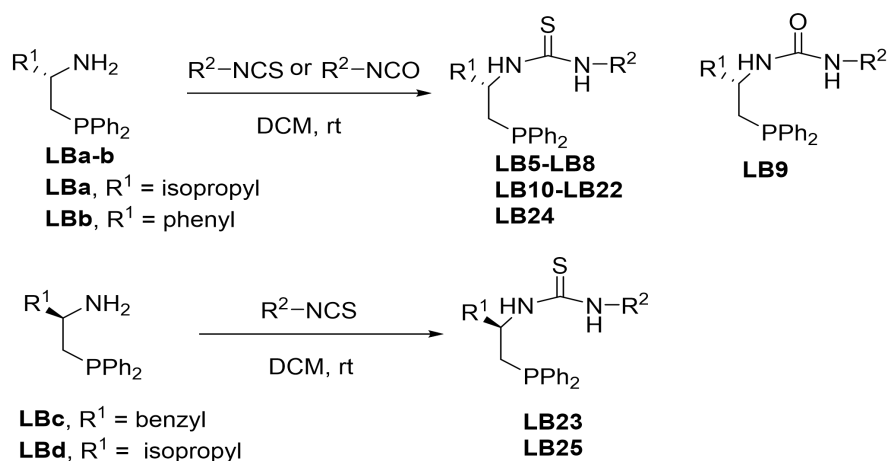

**LBa-d**, isothiocyanate and isocyanate were prepared according to the reported literature.<sup>[2,3]</sup> Catalysts **LB1-LB5**, **LB7**, **LB11**, **LB18-LB20** were known compounds.<sup>[4]</sup>

**Procedure (II):** To a solution of **LBa-d** (1.0 eq) in DCM under N<sub>2</sub> atmosphere was added isothiocyanate or isocyanate (1.2 eq), and the reaction mixture was stirred at room temperature for 24 hrs. Solvent was then removed under reduced pressure, and the residue was directly subjected to column chromatographic separation on silica gel (hexane/ethyl acetate = 15:1 to 10:1) to afford chiral phosphines as a white solid.

**(S)-1-(1-(diphenylphosphaneyl)-3-methylbutan-2-yl)-3-(naphthalen-2-yl)thiourea (LB6)**

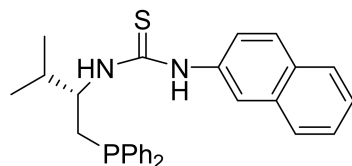

**LB6**

Compound **LB6** (168.8 mg, 74% yield) was obtained as a white solid following the *general procedure II* from **LBa** (0.5 mmol, 136 mg) and 2-isothiocyanatonaphthalene (0.6 mmol, 111 mg) stirred for 24 hours. <sup>1</sup>H NMR (400 MHz, CDCl<sub>3</sub>) δ 8.76-8.67 (m, 1H), 8.10 (s, 1H), 7.91-7.84 (m, 2H), 7.56-7.40 (m, 7H), 7.29-7.28 (m, 7H), 5.80 (brs, 1H), 4.62 (brs, 1H), 2.30 (dd, *J* = 14.4, 5.6 Hz, 1H), 2.21 (dd, *J* = 14.4, 8.0 Hz, 1H), 2.06-1.97 (m, 1H), 0.74 (d, *J* = 6.8 Hz, 3H), 0.63 (d, *J* = 6.8 Hz, 3H); <sup>13</sup>C NMR (100 MHz, CDCl<sub>3</sub>) δ 180.8, 134.4, 132.7 (d, *J* = 8.2 Hz), 132.5 (d, *J* = 8.2 Hz), 131.5, 129.7, 128.5, 128.34, 128.30, 128.27, 128.23, 128.18, 127.2, 126.8, 125.5, 125.0, 122.7, 58.0 (d, *J* = 14.5 Hz), 31.4 (d, *J* = 8.6 Hz), 31.1 (d, *J* = 13.5 Hz), 18.6, 17.5; <sup>31</sup>P NMR (162 MHz, CDCl<sub>3</sub>, 85% H<sub>3</sub>PO<sub>4</sub>) δ -24.3; **Mp**: 61-63 °C. **HRMS** Calcd. for C<sub>28</sub>H<sub>30</sub>N<sub>2</sub>PS<sup>+</sup> [M+H]<sup>+</sup>: 457.1867, found: 457.1852; [α]<sup>20</sup><sub>D</sub> = +77.7 (c 0.22, CH<sub>2</sub>Cl<sub>2</sub>).

**(S)-1-benzyl-3-(1-(diphenylphosphaneyl)-3-methylbutan-2-yl)thiourea (LB8)**



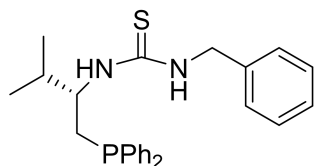

**LB8**

Compound **LB8** (196.9 mg, 94% yield) was obtained as a white solid following the *general procedure II* from **LBa** (0.5 mmol, 136 mg) and isothiocyanatomethylbenzene (0.6 mmol, 89.5 mg, 79  $\mu$ l) stirred for 24 hours.  $^1\text{H}$  NMR (400 MHz,  $\text{CDCl}_3$ )  $\delta$  7.48-7.28 (m, 13H), 7.22 (d,  $J = 7.2$  Hz, 2H), 7.12-7.02 (m, 1H), 6.07 (brs, 1H), 4.38 (brs, 2H), 2.40-2.27 (m, 2H), 2.06-1.98 (m, 1H), 0.78 (s, 6H);  $^{13}\text{C}$  NMR (125 MHz,  $\text{CDCl}_3$ )  $\delta$  181.1, 138.1 (d,  $J = 12.3$  Hz), 137.9, 136.8, 132.6 (d,  $J = 19.1$  Hz), 132.5 (d,  $J = 18.9$  Hz), 128.54, 128.48, 128.33, 128.28 (d,  $J = 1.1$  Hz), 128.2, 127.5, 127.1, 57.6, 47.4, 31.8, 31.1 (d,  $J = 8.5$  Hz), 18.4, 17.6;  $^{31}\text{P}$  NMR (162 MHz,  $\text{CDCl}_3$ , 85%  $\text{H}_3\text{PO}_4$ )  $\delta$  -23.5; **Mp**: 99-101  $^\circ\text{C}$ . **HRMS** Calcd. for  $\text{C}_{25}\text{H}_{30}\text{N}_2\text{PS}^+ [\text{M}+\text{H}]^+$ : 421.1867, found: 421.1854;  $[\alpha]_D^{20} = +16.0$  (c 0.21,  $\text{CH}_2\text{Cl}_2$ ).

**(S)-1-benzyl-3-(1-(diphenylphosphanyl)-3-methylbutan-2-yl)urea (LB9)**

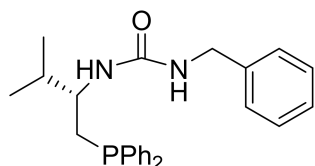

**LB9**

Compound **LB9** (301.9 mg, 75% yield) was obtained as a white solid following the *general procedure II* from **LBa** (0.1 mmol, 272 mg) and (isothiocyanatomethyl)benzene (1.2 mmol, 159.8 mg, 148  $\mu$ L) stirred for 24 hours.  $^1\text{H}$  NMR (400 MHz,  $\text{CDCl}_3$ )  $\delta$  7.51-7.43 (m, 5H), 7.36-7.31 (m, 6H), 7.24-7.18 (m, 4H), 5.97 (brs, 1H), 5.70 (brs, 1H), 4.18 (d,  $J = 5.6$  Hz, 2H), 3.82 (brs, 1H), 2.22 (d,  $J = 7.2$  Hz, 2H), 1.93-1.85 (m, 1H), 0.82 (d,  $J = 6.8$  Hz, 6H);  $^{13}\text{C}$  NMR (125 MHz,  $\text{CDCl}_3$ )  $\delta$  158.3 (d,  $J = 3.3$  Hz), 139.6, 138.8 (d,  $J = 13.8$  Hz), 138.6 (d,  $J = 12.5$  Hz), 132.8, 132.6 (d,  $J = 2.6$  Hz), 132.5, 128.32, 128.25, 128.21 (d,  $J = 1.8$  Hz), 128.2, 126.9, 126.6, 52.8 (d,  $J = 15.0$  Hz), 43.8, 32.6 (d,  $J = 13.8$  Hz), 32.4 (d,  $J = 8.8$  Hz), 19.0, 17.2;  $^{31}\text{P}$  NMR (162 MHz,  $\text{CDCl}_3$ , 85%  $\text{H}_3\text{PO}_4$ )  $\delta$  -22.0; **Mp**: 104-105  $^\circ\text{C}$ . **HRMS**

Calcd. for  $C_{25}H_{30}N_2OP^+ [M+H]^+$ : 405.2096, found: 405.2085;  $[\alpha]^{20}_D = +24.1$  (c 0.23,  $CH_2Cl_2$ ).

**(S)-1-(1-(diphenylphosphaneyl)-3-methylbutan-2-yl)-3-phenethylthiourea (LB10)**

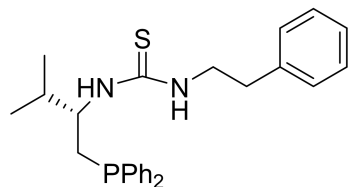

**LB10**

Compound **LB10** (434.0 mg, 99% yield) was obtained as a white solid following the *general procedure II* from **LBa** (0.1 mmol, 272 mg) and (2-isothiocyanatoethyl)benzene (1.2 mmol, 195.6 mg) stirred for 24 hours.  $^1H$  NMR (400 MHz,  $CDCl_3$ )  $\delta$  7.49-7.44 (m, 4H), 7.33-7.28 (m, 8H), 7.22-7.15 (m, 3H), 6.51 (brs, 1H), 4.56 (brs, 1H), 3.51 (brs, 2H), 2.81 (t,  $J = 7.2$  Hz, 2H), 2.41-2.34 (m, 2H), 2.09-2.00 (m, 1H), 0.91 (d,  $J = 6.4$  Hz, 6H);  $^{13}C$  NMR (100 MHz,  $CDCl_3$ )  $\delta$  180.9, 138.0, 137.7 (d,  $J = 11.2$  Hz), 137.5, 132.5 (d,  $J = 19.0$  Hz), 132.3 (d,  $J = 18.6$  Hz), 128.5, 128.3, 128.2, 128.1 (d,  $J = 1.5$  Hz), 126.1, 56.8, 45.0, 34.7, 31.6 (d,  $J = 8.0$  Hz), 31.0 (d,  $J = 15.5$  Hz), 18.4, 17.7;  $^{31}P$  NMR (162 MHz,  $CDCl_3$ , 85%  $H_3PO_4$ )  $\delta$  -23.0; **Mp**: 61-63 °C; **HRMS** Calcd. for  $C_{26}H_{32}N_2PS^+ [M+H]^+$ : 435.2024, found: 435.2011;  $[\alpha]^{20}_D = +10.8$  (c 0.20,  $CH_2Cl_2$ ).

**(S)-1-(1-(diphenylphosphaneyl)-3-methylbutan-2-yl)-3-(2-methylbenzyl)thiourea (LB12)**

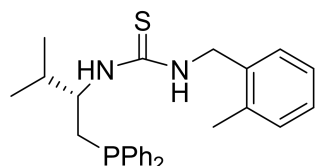

**LB12**

Compound **LB12** (183.6 mg, 85% yield) was obtained as a white solid following the *general procedure II* from **LBa** (0.05 mmol, 136 mg) and 1-(isothiocyanatomethyl)-2-methylbenzene (0.6 mmol, 89.4 mg) stirred for 24 hours.  $^1H$  NMR (400 MHz,  $CDCl_3$ )  $\delta$  7.46-7.31 (m, 11H), 7.19-7.12 (m, 4H), 6.68 (brs, 1H),

6.15 (brs, 1H), 4.36 (brs, 2H), 2.42-2.37 (m, 1H), 2.32-2.30 (m, 1H), 2.26 (s, 3H), 2.10-2.01 (m, 1H), 0.82 (d,  $J = 7.2$  Hz, 6H);  $^{13}\text{C}$  NMR (125 MHz,  $\text{CDCl}_3$ )  $\delta$  181.1, 138.1 (d,  $J = 11.5$  Hz), 137.8, 136.0, 134.5, 132.7, 132.6, 132.4, 130.4, 128.6, 128.5, 128.28 (d,  $J = 6.8$  Hz), 128.26 (d,  $J = 6.9$  Hz), 127.8, 127.6, 126.0, 57.5, 45.9, 31.8, 31.2 (d,  $J = 13.6$  Hz), 18.9, 18.4, 17.7;  $^{31}\text{P}$  NMR (162 MHz,  $\text{CDCl}_3$ , 85%  $\text{H}_3\text{PO}_4$ )  $\delta$  -23.5; **Mp**: 54-56 °C. **HRMS** Calcd. for  $\text{C}_{26}\text{H}_{32}\text{N}_2\text{PS}^+$   $[\text{M}+\text{H}]^+$ : 435.2024, found: 435.2012;  $[\alpha]^{20}_{\text{D}} = +15.8$  (c 0.26,  $\text{CH}_2\text{Cl}_2$ ).

**(S)-1-(1-(diphenylphosphaneyl)-3-methylbutan-2-yl)-3-(2-fluorobenzyl)thiourea (LB13)**

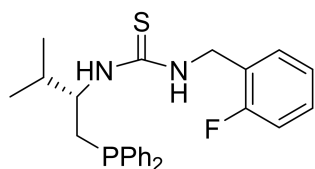

**LB13**

Compound **LB13** (209.8 mg, 89% yield) was obtained as a white solid following the *general procedure II* from **LBa** (0.54 mmol, 146 mg) and 1-fluoro-2-(isothiocyanatomethyl)benzene (0.65 mmol, 108 mg) stirred for 24 hours.  $^1\text{H}$  NMR (400 MHz,  $\text{CDCl}_3$ )  $\delta$  7.45-7.29 (m, 11H), 7.25-7.21 (m, 1H), 7.09-6.98 (m, 2H), 6.60 (brs, 1H), 6.10 (brs, 1H), 4.43 (brs, 2H), 2.42-2.26 (m, 2H), 2.07-2.02 (m, 1H), 0.83 (d,  $J = 6.8$  Hz, 6H);  $^{13}\text{C}$  NMR (125 MHz,  $\text{CDCl}_3$ )  $\delta$  181.3, 160.2 (d,  $J = 244.5$  Hz), 138.0 (d,  $J = 11.6$  Hz), 137.7, 132.7 (d,  $J = 19.1$  Hz), 132.5 (d,  $J = 18.9$  Hz), 129.6 (d,  $J = 3.1$  Hz), 129.1 (d,  $J = 8.0$  Hz), 128.6, 128.5, 128.3 (d,  $J = 6.8$  Hz), 128.27 (d,  $J = 6.9$  Hz), 124.2 (d,  $J = 3.1$  Hz), 115.0 (d,  $J = 21.3$  Hz), 57.6, 41.0, 31.9 (d,  $J = 6.5$  Hz), 31.2 (d,  $J = 12.9$  Hz), 18.4, 17.7;  $^{31}\text{P}$  NMR (162 MHz,  $\text{CDCl}_3$ , 85%  $\text{H}_3\text{PO}_4$ )  $\delta$  -23.2;  $^{19}\text{F}$  NMR (376 MHz,  $\text{CDCl}_3$ )  $\delta$  -118.3; **Mp**: 43-45 °C; **HRMS** Calcd. for  $\text{C}_{25}\text{H}_{29}\text{FN}_2\text{PS}^+$   $[\text{M}+\text{H}]^+$ : 439.1773, found: 439.1761;  $[\alpha]^{20}_{\text{D}} = +7.8$  (c 0.20,  $\text{CH}_2\text{Cl}_2$ ).

**(S)-1-(1-(diphenylphosphaneyl)-3-methylbutan-2-yl)-3-(3-fluorobenzyl)thiourea (LB14)**

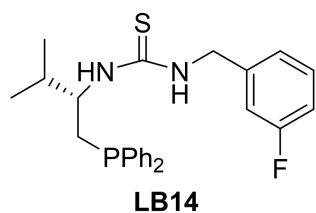

Compound **LB14** (189.2 mg, 86% yield) was obtained as a white solid following the *general procedure II* from **LBa** (0.5 mmol, 136 mg) and 1-fluoro-3-(isothiocyanatomethyl)benzene (0.6 mmol, 100.3 mg, 82  $\mu$ L) stirred for 24 hours.  $^1\text{H NMR}$  (400 MHz,  $\text{CDCl}_3$ )  $\delta$  7.45-7.30 (m, 10H), 7.24-7.20 (m, 1H), 6.99-6.90 (m, 3H), 6.34 (brs, 1H), 4.44 (brs, 2H), 2.39-2.25 (m, 2H), 2.08-1.99 (m, 1H), 0.79 (s, 6H);  $^{13}\text{C NMR}$  (125 MHz,  $\text{CDCl}_3$ )  $\delta$  181.6, 162.8 (d,  $J = 245.5$  Hz), 139.8, 138.1, 132.8, 132.7, 132.5, 130.3 (d,  $J = 9.5$  Hz), 130.1 (d,  $J = 8.1$  Hz), 128.7 (d,  $J = 11.5$  Hz), 128.44 (d,  $J = 6.8$  Hz), 128.41 (d,  $J = 6.9$  Hz), 122.8, 114.4 (d,  $J = 21.1$  Hz), 114.1 (d,  $J = 21.8$  Hz), 57.7, 47.1, 30.0, 31.2 (d,  $J = 11.3$  Hz), 18.5, 17.7;  $^{31}\text{P NMR}$  (162 MHz,  $\text{CDCl}_3$ , 85%  $\text{H}_3\text{PO}_4$ )  $\delta$  -23.5;  $^{19}\text{F NMR}$  (376 MHz,  $\text{CDCl}_3$ )  $\delta$  -112.0; **Mp**: 97-99  $^\circ\text{C}$ . **HRMS** Calcd. for  $\text{C}_{25}\text{H}_{29}\text{FN}_2\text{PS}^+$   $[\text{M}+\text{H}]^+$ : 439.1773, found: 439.1762;  $[\alpha]_{\text{D}}^{20} = +13.5$  (c 0.21,  $\text{CH}_2\text{Cl}_2$ ).

**(S)-1-(1-(diphenylphosphaneyl)-3-methylbutan-2-yl)-3-(4-fluorobenzyl)thiourea (LB15)**

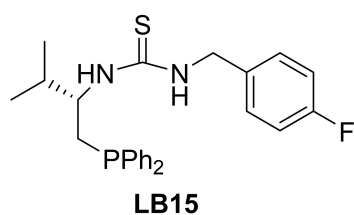

Compound **LB15** (179.6 mg, 82% yield) was obtained as a white solid following the *general procedure II* from **LBa** (0.5 mmol, 136 mg) and 1-fluoro-4-(isothiocyanatomethyl)benzene (0.6 mmol, 100.3 mg, 82  $\mu$ L) stirred for 24 hours.  $^1\text{H NMR}$  (400 MHz,  $\text{CDCl}_3$ )  $\delta$  7.44-7.30 (m, 10H), 7.18-7.15 (m, 2H), 6.98-6.93 (m, 2H), 6.29 (brs, 1H), 4.37 (brs, 2H), 2.40-2.25 (m, 2H), 2.04-1.98 (m, 1H), 0.79 (d,  $J = 6.8$  Hz, 6H);  $^{13}\text{C NMR}$  (125 MHz,  $\text{CDCl}_3$ )  $\delta$  181.2, 161.9 (d,  $J = 244.8$  Hz), 138.0 (d,  $J = 11.3$  Hz), 137.7, 132.7, 132.6, 132.4, 128.9 (d,  $J = 7.9$  Hz),

128.6, 128.5, 128.32 (d,  $J = 6.8$  Hz), 128.28 (d,  $J = 6.9$  Hz), 115.3 (d,  $J = 21.4$  Hz), 57.6, 46.7, 31.9, 31.1 (d,  $J = 13.3$  Hz), 18.3, 17.7;  $^{31}\text{P}$  NMR (162 MHz,  $\text{CDCl}_3$ , 85%  $\text{H}_3\text{PO}_4$ )  $\delta$  -23.6;  $^{19}\text{F}$  NMR (376 MHz,  $\text{CDCl}_3$ )  $\delta$  -114.2; **Mp**: 93-95 °C. **HRMS** Calcd. for  $\text{C}_{25}\text{H}_{29}\text{N}_2\text{FPS}^+$   $[\text{M}+\text{H}]^+$ : 439.1773, found: 439.1761;  $[\alpha]^{20}_{\text{D}} = +10.8$  (c 0.21,  $\text{CH}_2\text{Cl}_2$ ).

**(S)-1-(1-(diphenylphosphaneyl)-3-methylbutan-2-yl)-3-(4-(trifluoromethyl)benzyl)thiourea (LB16)**

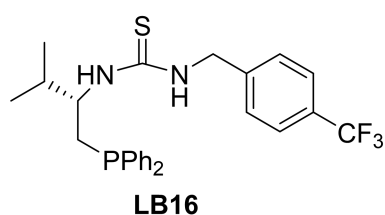

Compound **LB16** (154.4 mg, 83% yield) was obtained as a white solid following the *general procedure II* from **LBa** (0.38 mmol, 103 mg) and 1-(isothiocyanatomethyl)-4-(trifluoromethyl)benzene (0.76 mmol, 165 mg) stirred for 24 hours.  $^1\text{H}$  NMR (400 MHz,  $\text{CDCl}_3$ )  $\delta$  7.53-7.30 (m, 14H), 7.15 (brs, 1H), 6.39 (brs, 1H), 4.51 (brs, 2H), 2.42-2.24 (m, 2H), 2.05-1.97 (m, 1H), 0.81 (s, 6H);  $^{13}\text{C}$  NMR (125 MHz,  $\text{CDCl}_3$ )  $\delta$  181.6, 141.5, 138.1 (d,  $J = 10.4$  Hz), 137.6, 132.7 (d,  $J = 19.1$  Hz), 132.4 (d,  $J = 18.8$  Hz), 128.7, 128.5, 128.4 (d,  $J = 6.8$  Hz), 128.3 (d,  $J = 7.0$  Hz), 127.3, 125.3 (d,  $J = 3.8$  Hz), 123.8 (q,  $J = 271$  Hz), 57.6 (d,  $J = 16.3$  Hz), 46.9, 32.1, 31.3, 18.3, 17.7;  $^{31}\text{P}$  NMR (162 MHz,  $\text{CDCl}_3$ , 85%  $\text{H}_3\text{PO}_4$ )  $\delta$  -23.4;  $^{19}\text{F}$  NMR (376 MHz,  $\text{CDCl}_3$ )  $\delta$  -62.3; **Mp**: 101-103 °C. **HRMS** Calcd. for  $\text{C}_{26}\text{H}_{29}\text{N}_2\text{F}_3\text{PS}^+$   $[\text{M}+\text{H}]^+$ : 489.1741, found: 489.1730;  $[\alpha]^{20}_{\text{D}} = +7.7$  (c 0.15,  $\text{CH}_2\text{Cl}_2$ ).

**(S)-1-(1-(diphenylphosphaneyl)-3-methylbutan-2-yl)-3-(4-methoxybenzyl)thiourea (LB17)**

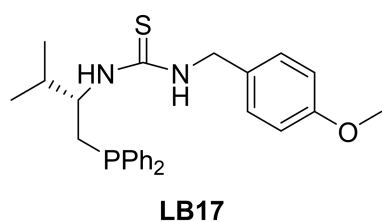

Compound **LB17** (403.8 mg, 90% yield) was obtained as a white solid following the *general procedure II* from **LBa** (1 mmol, 272 mg) and 1-(isothiocyanatomethyl)-4-methoxybenzene (1.2 mmol, 215 mg, 198  $\mu$ L) stirred for 24 hours.  $^1\text{H NMR}$  (400 MHz,  $\text{CDCl}_3$ )  $\delta$  7.46-7.28 (m, 10H), 7.12 (d,  $J = 8.4$  Hz, 2H), 6.80 (d,  $J = 8.4$  Hz, 2H), 4.53 (brs, 2H), 3.69 (s, 3H), 2.37-2.25 (m, 2H), 2.08-1.95 (m, 1H), 0.76 (s, 6H);  $^{13}\text{C NMR}$  (125 MHz,  $\text{CDCl}_3$ )  $\delta$  180.9, 158.7, 138.0 (d,  $J = 12.1$  Hz), 137.8, 132.6, 132.5, 132.3, 128.4, 128.3, 128.2, 128.14, 128.09, 113.8, 57.4, 54.9, 46.8, 31.7, 31.1 (d,  $J = 13.9$  Hz), 18.3, 17.6;  $^{31}\text{P NMR}$  (162 MHz,  $\text{CDCl}_3$ , 85%  $\text{H}_3\text{PO}_4$ )  $\delta$  -23.5; **Mp**: 43-45  $^\circ\text{C}$ . **HRMS** Calcd. for  $\text{C}_{26}\text{H}_{32}\text{N}_2\text{OPS}^+$   $[\text{M}+\text{H}]^+$ : 451.1973, found: 451.1962;  $[\alpha]_D^{20} = +18.5$  (c 0.22,  $\text{CH}_2\text{Cl}_2$ ).

**1-((S)-1-(diphenylphosphaneyl)-3-methylbutan-2-yl)-3-((R)-1-phenylethyl)thiourea (LB21)**

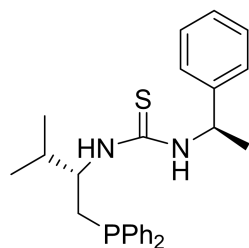

**LB21**

Compound **LB21** (193 mg, 89% yield) was obtained as a white solid following the *general procedure II* from **LBa** (0.5 mmol, 136 mg) and (*R*)-(1-isothiocyanatoethyl)benzene (0.6 mmol, 98 mg) stirred for 24 hours.  $^1\text{H NMR}$  (400 MHz,  $\text{CDCl}_3$ )  $\delta$  7.53 (t,  $J = 7.2$  Hz, 2H), 7.45 (t,  $J = 7.2$  Hz, 2H), 7.35-7.28 (m, 8H), 7.22 (t,  $J = 7.2$  Hz, 1H), 7.17 (d,  $J = 7.2$  Hz, 2H), 6.89 (brs, 1H), 5.11 (brs, 1H), 4.56 (brs, 1H), 3.63 (brs, 1H), 2.37 (dd,  $J = 14.4, 5.2$  Hz, 1H), 2.26 (dd,  $J = 14.4, 8.0$  Hz, 1H), 1.84-1.79 (m, 1H), 1.31 (d,  $J = 6.8$  Hz, 3H), 0.52 (s, 3H), 0.41 (s, 3H);  $^{13}\text{C NMR}$  (100 MHz,  $\text{CDCl}_3$ )  $\delta$  179.2, 142.0, 138.2, 132.7 (d,  $J = 19.3$  Hz), 132.4 (d,  $J = 18.9$  Hz), 128.9, 128.5, 128.3 (d,  $J = 3.3$  Hz), 128.2 (d,  $J = 2.6$  Hz), 128.1, 127.6, 125.3, 58.1, 52.8, 31.4 (d,  $J = 9.0$  Hz), 30.8 (d,  $J = 13.0$  Hz), 23.6, 17.8, 17.1;  $^{31}\text{P NMR}$  (162 MHz,  $\text{CDCl}_3$ , 85%  $\text{H}_3\text{PO}_4$ )  $\delta$  -23.6; **Mp**: 51-53  $^\circ\text{C}$ . **HRMS** Calcd. for

$C_{26}H_{32}N_2PS^+ [M+H]^+$ : 435.2024, found: 435.2013;  $[\alpha]^{20}_D = +0.38$  (c 0.26,  $CH_2Cl_2$ ).

**1-((S)-1-(diphenylphosphaneyl)-3-methylbutan-2-yl)-3-((S)-1-phenylethyl)thiourea (LB22)**

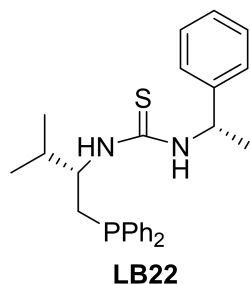

Compound **LB22** (1.0 g, 88% yield) was obtained as a white solid following the *general procedure II* from **LBa** (2.62 mmol, 713 mg) and (S)-1-isothiocyanoethylbenzene (3.14 mmol, 512 mg) stirred for 24 hours.  $^1H$  NMR (400 MHz,  $CDCl_3$ )  $\delta$  7.41-7.30 (m, 14H), 7.24-7.20 (m, 1H), 6.54 (brs, 1H), 5.82 (brs, 1H), 4.83 (brs, 1H), 4.27 (brs, 1H), 2.18-2.00 (m, 3H), 1.48 (d,  $J = 6.4$  Hz, 3H), 0.82 (d,  $J = 6.8$  Hz, 3H), 0.75 (d,  $J = 4.0$  Hz, 3H);  $^{13}C$  NMR (125 MHz,  $CDCl_3$ )  $\delta$  180.5, 142.2, 137.8 (d,  $J = 11.9$  Hz), 132.6, 132.5, 132.3, 128.7, 128.3, 128.2, 128.1 (d,  $J = 6.6$  Hz), 128.0 (d,  $J = 6.9$  Hz), 127.3, 125.6, 57.1 (d,  $J = 14.9$  Hz), 53.5, 31.3 (d,  $J = 14.6$  Hz), 31.0, 22.9, 18.6, 17.0;  $^{31}P$  NMR (162 MHz,  $CDCl_3$ , 85%  $H_3PO_4$ )  $\delta$  -23.9; **Mp**: 49-51 °C; **HRMS** Calcd. for  $C_{26}H_{32}N_2PS^+ [M+H]^+$ : 435.2024, found: 435.2011;  $[\alpha]^{20}_D = +34.4$  (c 0.24  $CH_2Cl_2$ ).

**1-((R)-1-(diphenylphosphaneyl)-3-phenylpropan-2-yl)-3-((S)-1-phenylethyl)thiourea (LB23)**

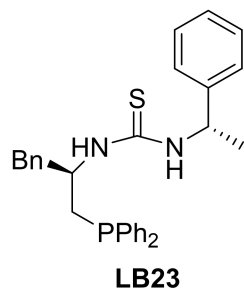

Compound **LB23** (216.2 mg, 88% yield) was obtained as a white solid following the *general procedure II* from **LBc** (0.6 mmol, 194 mg) and

(*S*)-(1-isothiocyanatoethyl)benzene (0.72 mmol, 119 mg) stirred for 24 hours.  $^1\text{H}$  NMR (400 MHz,  $\text{CDCl}_3$ )  $\delta$  7.49-7.31 (m, 14H), 7.22-7.16 (m, 5H), 6.91 (s, 2H), 5.54 (brs, 1H), 4.93 (brs, 1H), 4.05 (brs, 1H), 2.96-2.92 (m, 1H), 2.73 (s, 1H), 2.49-2.45 (m, 1H), 2.28-2.22 (m, 1H), 1.37 (d,  $J = 6.4$  Hz, 3H);  $^{13}\text{C}$  NMR (100 MHz,  $\text{CDCl}_3$ )  $\delta$  179.4, 141.9, 137.8 (d,  $J = 11.8$  Hz), 137.3, 136.8, 132.7 (d,  $J = 19.3$  Hz), 132.4 (d,  $J = 18.9$  Hz), 128.9, 128.8, 128.6, 128.5, 128.3 (d,  $J = 13.6$  Hz), 128.2, 128.1, 127.5, 126.0, 125.3, 54.0 (d,  $J = 14.9$  Hz), 52.9, 40.6 (d,  $J = 9.5$  Hz), 32.4 (d,  $J = 15.3$  Hz), 23.5;  $^{31}\text{P}$  NMR (162 MHz,  $\text{CDCl}_3$ , 85%  $\text{H}_3\text{PO}_4$ )  $\delta$  -23.7; **Mp**: 53-55 °C; **HRMS** Calcd. for  $\text{C}_{30}\text{H}_{32}\text{N}_2\text{PS}^+ [\text{M}+\text{H}]^+$ : 483.2024, found: 483.2012;  $[\alpha]_D^{20} = -12.7$  (c 0.23  $\text{CH}_2\text{Cl}_2$ ).

**1-((*S*)-2-(diphenylphosphaneyl)-1-phenylethyl)-3-((*S*)-1-phenylethyl)thiourea  
(LB24)**

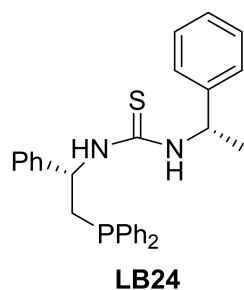

Compound **LB24** (229 mg, 98% yield) was obtained as a white solid following the *general procedure II* from **LBb** (0.5 mmol, 152.5 mg) and (*S*)-(1-isothiocyanatoethyl)benzene (0.6 mmol, 100 mg) stirred for 24 hours.  $^1\text{H}$  NMR (400 MHz,  $\text{CDCl}_3$ )  $\delta$  7.39-7.31 (m, 18H), 7.16-7.14 (m, 2H), 6.64 (brs, 1H), 6.14 (brs, 1H), 5.06 (brs, 1H), 2.74-2.69 (m, 1H), 2.37 (brs, 1H), 1.31 (d,  $J = 6.8$  Hz, 3H);  $^{13}\text{C}$  NMR (125 MHz,  $\text{CDCl}_3$ )  $\delta$  180.2, 142.3, 140.9 (d,  $J = 3.0$  Hz), 137.4, 136.9, 132.73 (d,  $J = 15.3$  Hz), 132.68 (d,  $J = 15.3$  Hz), 128.8, 128.7 (d,  $J = 3.6$  Hz), 128.4 (d,  $J = 5.5$  Hz), 127.9, 127.6, 126.3, 125.9, 56.5 (d,  $J = 14.2$  Hz), 53.9, 36.7 (d,  $J = 12.0$  Hz), 22.4;  $^{31}\text{P}$  NMR (162 MHz,  $\text{CDCl}_3$ , 85%  $\text{H}_3\text{PO}_4$ )  $\delta$  -23.7; **Mp**: 62-64 °C; **HRMS** Calcd. for  $\text{C}_{29}\text{H}_{30}\text{N}_2\text{PS}^+ [\text{M}+\text{H}]^+$ : 469.1867, found: 469.1856;  $[\alpha]_D^{20} = +10.5$  (c 0.20  $\text{CH}_2\text{Cl}_2$ ).

**1-((*R*)-1-(diphenylphosphaneyl)-3-methylbutan-2-yl)-3-((*S*)-1-phenylethyl)thiourea**



## ea (LB25)

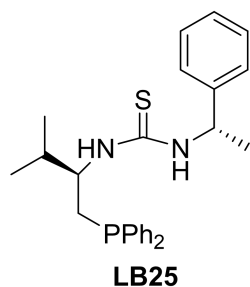

Compound **LB25** (205.5 mg, 95% yield) was obtained as a white solid following the *general procedure II* from **LBd** (0.5 mmol, 136 mg) and (*S*)-(1-isothiocyanatoethyl)benzene (0.6 mmol, 97.8 mg) stirred for 24 hours.  $^1\text{H}$  NMR (400 MHz,  $\text{CDCl}_3$ )  $\delta$  7.54-7.28 (m, 12H), 7.23-7.15 (m, 3H), 7.00 (brs, 1H), 5.10 (brs, 1H), 4.56 (brs, 1H), 3.61 (brs, 1H), 2.36 (dd,  $J = 14.4, 4.8$  Hz, 1H), 2.26 (dd,  $J = 14.4, 8.4$  Hz, 1H), 1.85-1.77 (m, 1H), 1.30 (d,  $J = 6.4$  Hz, 3H), 0.50 (s, 3H), 0.41 (s, 3H);  $^{13}\text{C}$  NMR (100 MHz,  $\text{CDCl}_3$ )  $\delta$  179.3, 142.0, 138.3, 132.6 (d,  $J = 26.7$  Hz), 132.4 (d,  $J = 26.2$  Hz), 128.9, 128.5, 128.3, 128.2 (d,  $J = 1.9$  Hz), 128.1, 127.6, 125.3, 58.1, 52.8, 31.5 (d,  $J = 9.4$  Hz), 30.8 (d,  $J = 14.4$  Hz), 23.6, 17.9, 17.1;  $^{31}\text{P}$  NMR (162 MHz,  $\text{CDCl}_3$ , 85%  $\text{H}_3\text{PO}_4$ )  $\delta$  -23.5; **Mp**: 51-56 °C. **HRMS** Calcd. for  $\text{C}_{26}\text{H}_{32}\text{N}_2\text{PS}^+$   $[\text{M}+\text{H}]^+$ : 435.2024, found: 435.2012;  $[\alpha]_D^{20} = -4.7$  (c 0.23,  $\text{CH}_2\text{Cl}_2$ ).

## General procedure (III) for the synthesis of R-C compounds 3

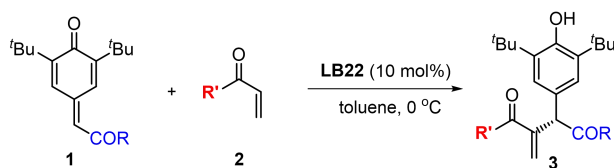

**Procedure (III):** To a solution of compound **1** (0.1 mmol, 1.0 eq.) and chiral phosphine **LB22** (0.01 mmol, 0.1 eq.) in toluene (1.0 mL) was added vinyl ketone **2** (0.15 mmol, 1.5 eq.) under nitrogen atmosphere at 0 °C. TLC monitor until the compound **1** consumed after six hours. The reaction mixture was then concentrated on a rotary evaporator under reduce pressure and the residue was subjected to purification by column chromatography (silica gel, PE/EtOAc: 20/1 to 10/1,  $R_f = 0.5$ -0.6) to afford the corresponding product **3**.

**Methyl (S)-2-(3,5-di-tert-butyl-4-hydroxyphenyl)-3-methylene-4-oxopentanoate (3a)**

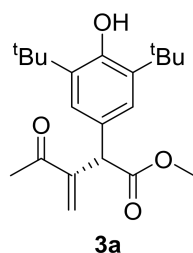

Compound **3a** (34.5 mg, 99% yield) was obtained as a white solid following the *general procedure III* from **1a** (0.1 mmol, 27.6 mg) and **2a** (0.15 mmol, 10.5 mg, 12.5  $\mu$ L) stirred for 6 hours.  $^1\text{H NMR}$  (400 MHz,  $\text{CDCl}_3$ )  $\delta$  6.99 (s, 2H), 6.22 (s, 1H), 5.57 (s, 1H), 5.20 (s, 1H), 4.77 (s, 1H), 3.69 (s, 3H), 2.40 (s, 3H), 1.41 (s, 18H);  $^{13}\text{C NMR}$  (100 MHz,  $\text{CDCl}_3$ )  $\delta$  198.9, 173.0, 153.2, 148.1, 136.1, 128.4, 126.4, 125.5, 52.3, 51.7, 34.3, 30.2, 25.9; **Mp**: 111-113  $^\circ\text{C}$ ; **HRMS** Calcd. for  $\text{C}_{21}\text{H}_{29}\text{O}_4$   $[\text{M}-\text{H}]^-$ : 345.2066, found: 345.2078.

$[\alpha]_D^{20} = -106.4$  (c 0.16,  $\text{CH}_2\text{Cl}_2$ ) for 95% ee; Enantiomeric excess was determined by HPLC with a Chiralcel AD-H column, Hexane/*i*PrOH = 95/5, 0.5 mL/min, 230nm,  $t_{\text{minor}} = 15.167$  min,  $t_{\text{major}} = 11.200$  min.

**Racemic Sample 3a**

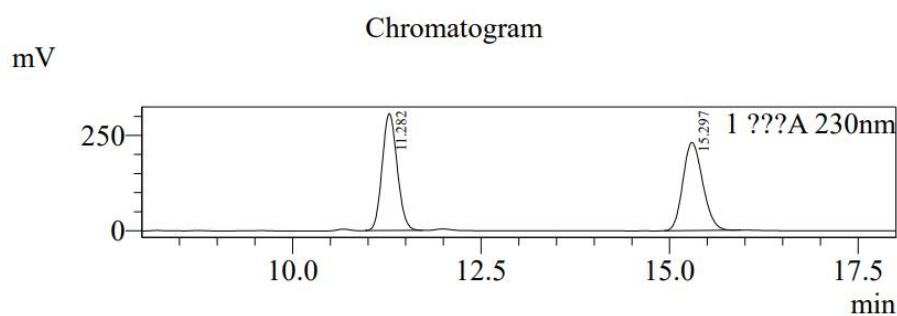

Peak Table

???A 230nm

| Peak# | Ret. Time | Area    | Height | Area%   |
|-------|-----------|---------|--------|---------|
| 1     | 11.282    | 4248400 | 306421 | 50.172  |
| 2     | 15.297    | 4219319 | 230706 | 49.828  |
| Total |           | 8467720 | 537127 | 100.000 |

**Enantiomeric Sample 3a**

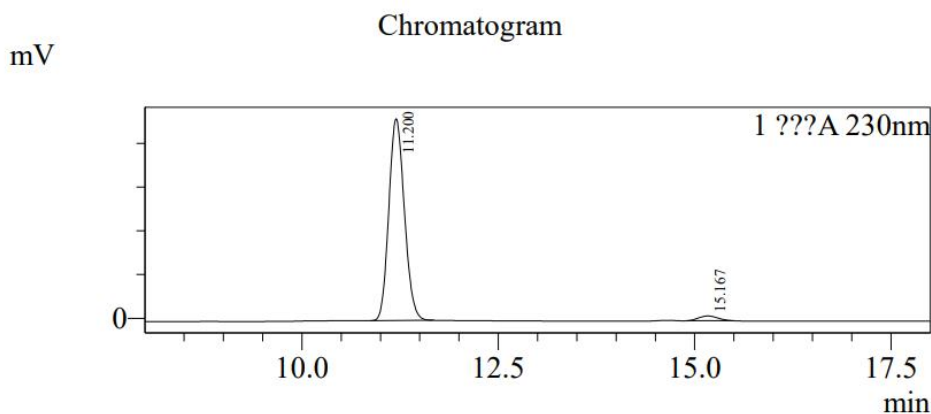

???A 230nm

| Peak# | Ret. Time | Area    | Height | Area%   |
|-------|-----------|---------|--------|---------|
| 1     | 11.200    | 3180643 | 230830 | 97.255  |
| 2     | 15.167    | 89788   | 5436   | 2.745   |
| Total |           | 3270431 | 236265 | 100.000 |

**Ethyl (S)-2-(3,5-di-tert-butyl-4-hydroxyphenyl)-3-methylene-4-oxopentanoate (3b)**

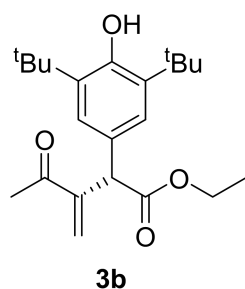

Compound **3b** (39.8 mg, 94% yield) was obtained as a white solid following the *general procedure III* from **1b** (0.1 mmol, 34.1 mg) and **2a** (0.15 mmol, 10.5 mg, 12.5  $\mu$ L) stirred for 6 hours.  $^1\text{H NMR}$  (400 MHz,  $\text{CDCl}_3$ )  $\delta$  6.99 (s, 2H), 6.20 (s, 1H), 5.56-5.55 (m, 1H), 5.18 (s, 1H), 4.75 (s, 1H), 4.23-4.08 (m, 2H), 2.39 (s, 3H), 1.41 (s, 18H), 1.23 (t,  $J = 7.2$  Hz, 3H);  $^{13}\text{C NMR}$  (100 MHz,  $\text{CDCl}_3$ )  $\delta$  198.9, 172.4, 153.1, 148.3, 136.1, 128.1, 126.6, 125.5, 61.0, 51.9, 34.3, 30.2, 25.8, 14.1; **Mp**: 108-110  $^\circ\text{C}$ ; **HRMS** Calcd. for  $\text{C}_{22}\text{H}_{31}\text{O}_4$   $[\text{M}-\text{H}]^-$ : 359.2222, found: 359.2218.

$[\alpha]_D^{20} = -112.9$  (c 0.14,  $\text{CH}_2\text{Cl}_2$ ) for 91% ee; Enantiomeric excess was determined by HPLC with a Chiralcel AD-H column, Hexane/*i*PrOH = 95/5, 0.5 mL/min, 230nm,  $t_{\text{minor}} = 12.179$  min,  $t_{\text{major}} = 9.930$  min.

**Racemic Sample 3b**

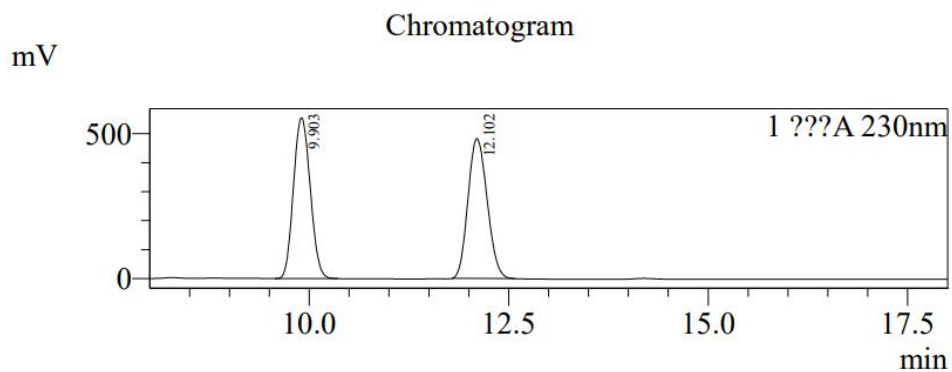

Peak Table

???A 230nm

| Peak# | Ret. Time | Area     | Height  | Area%   |
|-------|-----------|----------|---------|---------|
| 1     | 9.903     | 8131440  | 555040  | 50.149  |
| 2     | 12.102    | 8083260  | 482457  | 49.851  |
| Total |           | 16214701 | 1037497 | 100.000 |

### Enantiomeric Sample 3b

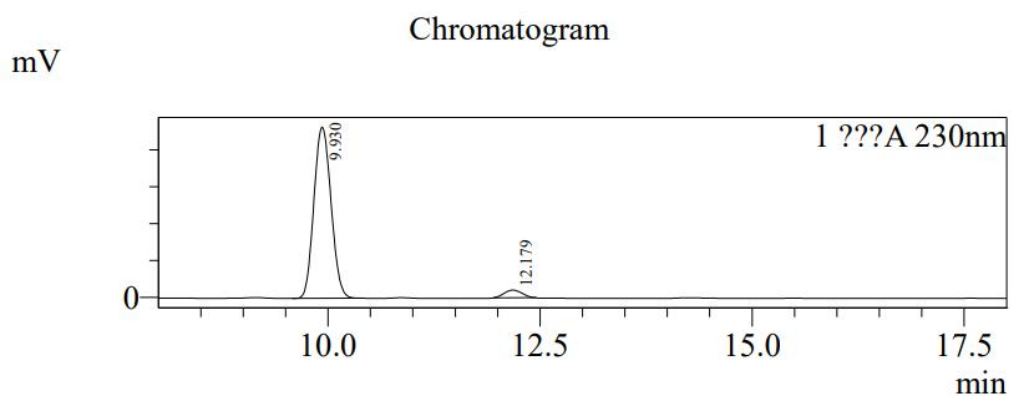

Peak Table

???A 230nm

| Peak# | Ret. Time | Area    | Height | Area%   |
|-------|-----------|---------|--------|---------|
| 1     | 9.930     | 6538877 | 464195 | 95.506  |
| 2     | 12.179    | 307692  | 20954  | 4.494   |
| Total |           | 6846570 | 485148 | 100.000 |

### Isopropyl

### (*S*)-2-(3,5-di-*tert*-butyl-4-hydroxyphenyl)-3-methylene-4-oxopentanoate (**3c**)

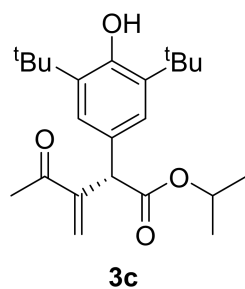

Compound **3c** (36.6 mg, 98% yield) was obtained as a white solid following the *general procedure III* from **1c** (0.1 mmol, 30.4 mg) and **2a** (0.15 mmol, 10.5 mg, 12.5  $\mu$ L) stirred for 6 hours.  $^1\text{H NMR}$  (400 MHz,  $\text{CDCl}_3$ )  $\delta$  6.97 (s, 2H), 6.18 (s, 1H), 5.52 (s, 1H), 5.16 (s, 1H), 5.07-4.97 (m, 1H), 4.72 (s, 1H), 2.39 (s, 3H), 1.41 (s, 18H), 1.25 (d,  $J = 6.4$  Hz, 3H), 1.16 (d,  $J = 6.4$  Hz, 3H);  $^{13}\text{C NMR}$  (100 MHz,  $\text{CDCl}_3$ )  $\delta$  199.0, 171.8, 153.0, 148.5, 136.0, 127.8, 126.8, 125.5, 68.2, 52.2, 34.3, 30.3, 25.8, 21.7, 21.4; **Mp**: 111-112  $^\circ\text{C}$ ; **HRMS** Calcd. for  $\text{C}_{23}\text{H}_{33}\text{O}_4$   $[\text{M}-\text{H}]^-$ : 373.2384, found: 373.2390.  $[\alpha]_D^{20} = -86.4$  (c 0.30,  $\text{CH}_2\text{Cl}_2$ ) for 92% ee; Enantiomeric excess was determined by HPLC with a Chiralcel AD-H column, Hexane/ $i$ PrOH = 95/5, 0.5 mL/min, 230nm,  $t_{\text{minor}} = 10.901$  min,  $t_{\text{major}} = 9.440$  min.

### Racemic Sample 3c

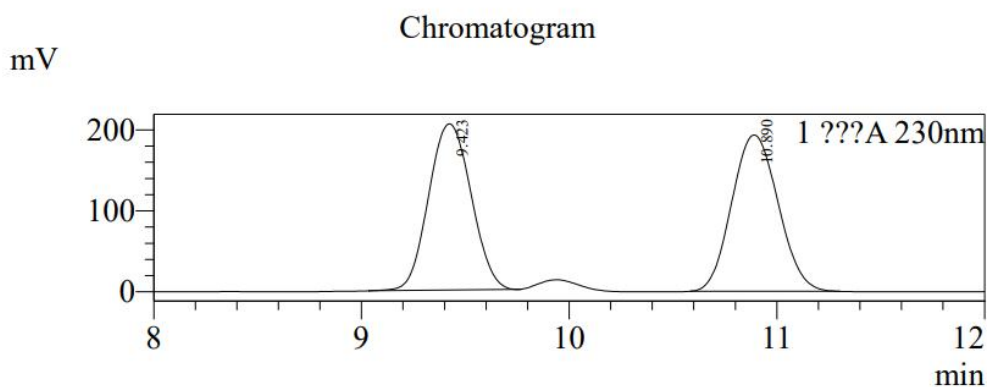

Peak Table

???A 230nm

| Peak# | Ret. Time | Area    | Height | Area%   |
|-------|-----------|---------|--------|---------|
| 1     | 9.423     | 2921028 | 205326 | 49.334  |
| 2     | 10.890    | 2999843 | 193091 | 50.666  |
| Total |           | 5920870 | 398417 | 100.000 |

### Enantiomeric Sample 3c

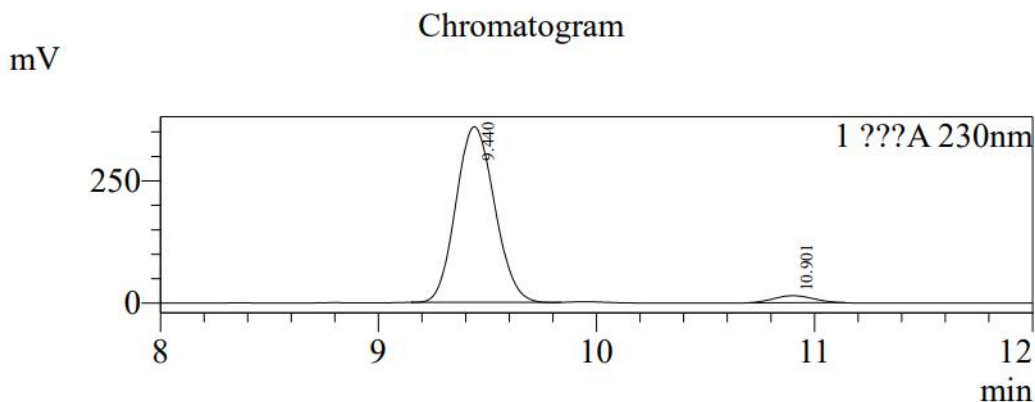

Peak Table

???A 230nm

| Peak# | Ret. Time | Area    | Height | Area%   |
|-------|-----------|---------|--------|---------|
| 1     | 9.440     | 4435534 | 359236 | 96.081  |
| 2     | 10.901    | 180942  | 14376  | 3.919   |
| Total |           | 4616476 | 373612 | 100.000 |

### Cyclopropylmethyl

#### (*S*)-2-(3,5-di-*tert*-butyl-4-hydroxyphenyl)-3-methylene-4-oxopentanoate (**3d**)

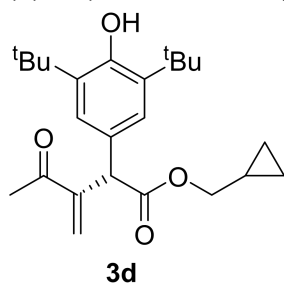

Compound **3d** (35.2 mg, 91% yield) was obtained as a white solid following the *general procedure III* from **1d** (0.1 mmol, 31.6 mg) and **2a** (0.15 mmol, 10.5 mg, 12.5  $\mu$ L) stirred for 6 hours.  $^1\text{H NMR}$  (400 MHz,  $\text{CDCl}_3$ )  $\delta$  7.00 (s, 2H), 6.21 (s, 1H), 5.57 (s, 1H), 5.17 (s, 1H), 4.79 (s, 1H), 3.98-3.89 (m, 2H), 2.40 (s, 3H), 1.41 (s, 18H), 1.14-1.07 (m, 1H), 0.54-0.49 (m, 2H), 0.24 (q,  $J = 5.2$  Hz, 2H);  $^{13}\text{C NMR}$  (100 MHz,  $\text{CDCl}_3$ )  $\delta$  198.9, 172.6, 153.1, 148.3, 136.0, 128.0, 126.7, 125.6, 69.6, 52.0, 34.3, 30.3, 25.9, 9.7, 3.3, 3.1; **Mp**: 106-109  $^\circ\text{C}$ ; **HRMS** Calcd. for  $\text{C}_{24}\text{H}_{33}\text{O}_4$   $[\text{M}-\text{H}]^-$ : 385.2379, found: 385.2373.

$[\alpha]_{\text{D}}^{20} = -4.4$  (c 0.07,  $\text{CH}_2\text{Cl}_2$ ) for 91% ee; Enantiomeric excess was determined by HPLC with a Chiralcel AD-H column, Hexane/*i*PrOH = 95/5, 0.5 mL/min, 230nm,  $t_{\text{minor}} = 13.709$  min,  $t_{\text{major}} = 10.864$  min.

#### Racemic Sample 3d

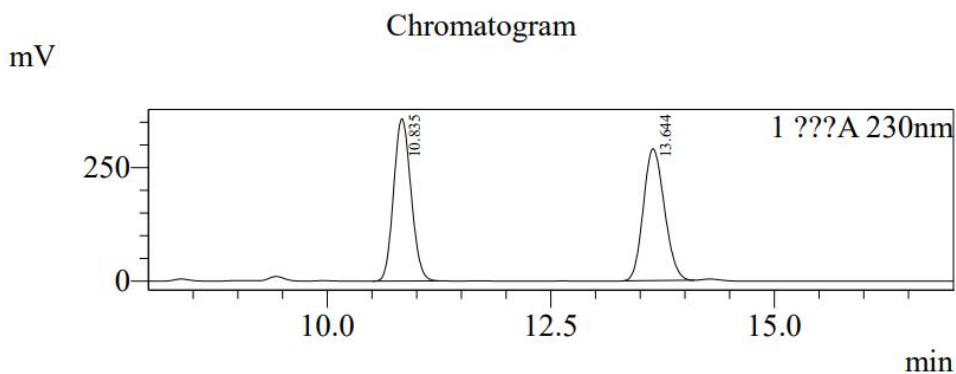

Peak Table

???A 230nm

| Peak# | Ret. Time | Area    | Height | Area%   |
|-------|-----------|---------|--------|---------|
| 1     | 10.835    | 4838777 | 357510 | 50.338  |
| 2     | 13.644    | 4773867 | 290278 | 49.662  |
| Total |           | 9612644 | 647788 | 100.000 |

### Enantiomeric Sample 3d

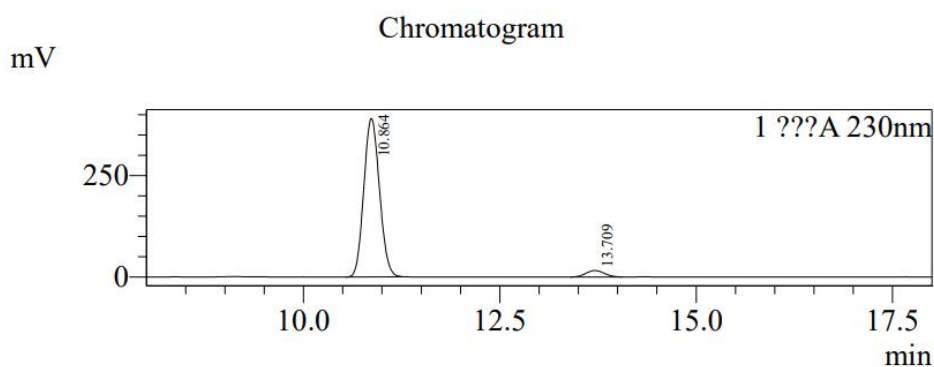

Peak Table

???A 230nm

| Peak# | Ret. Time | Area    | Height | Area%   |
|-------|-----------|---------|--------|---------|
| 1     | 10.864    | 5429406 | 390440 | 95.424  |
| 2     | 13.709    | 260377  | 16014  | 4.576   |
| Total |           | 5689784 | 406454 | 100.000 |

### Cinnamyl

#### (*S*)-2-(3,5-di-*tert*-butyl-4-hydroxyphenyl)-3-methylene-4-oxopentanoate (**3e**)

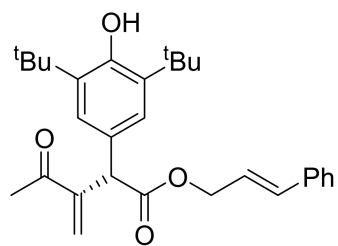

**3e**

Compound **3e** (37.6 mg, 83% yield) was obtained as a white solid following the

general procedure III from **1e** (0.1mmol, 37.8 mg) and **2a** (0.15 mmol, 10.5 mg, 12.5  $\mu$ L) stirred for 6 hours.  $^1\text{H NMR}$  (400 MHz,  $\text{CDCl}_3$ )  $\delta$  7.34-7.27 (m, 4H), 7.25-7.21 (m, 1H), 7.01 (s, 2H), 6.56 (d,  $J = 16.0$  Hz, 1H), 6.27-6.20 (m, 2H), 5.59 (s, 1H), 5.18 (s, 1H), 4.82 (s, 1H), 4.77 (d,  $J = 6.4$  Hz, 2H), 2.41 (s, 3H), 1.39 (s, 18H);  $^{13}\text{C NMR}$  (100 MHz,  $\text{CDCl}_3$ )  $\delta$  198.9, 172.2, 153.2, 148.1, 136.2, 136.1, 133.9, 128.5, 128.3, 127.9, 126.6, 126.4, 125.6, 123.1, 65.4, 51.9, 34.3, 30.2, 25.8; **Mp**: 104-106  $^\circ\text{C}$ ; **HRMS** Calcd. for  $\text{C}_{29}\text{H}_{35}\text{O}_4$  [M-H] $^-$ : 447.2541, found: 447.2550.

$[\alpha]_D^{20} = -88.9$  (c 0.18,  $\text{CH}_2\text{Cl}_2$ ) for 94% ee; Enantiomeric excess was determined by HPLC with a Chiralcel AD-H column, Hexane/*i*PrOH = 95/5, 0.5 mL/min, 230nm,  $t_{\text{minor}} = 22.167$  min,  $t_{\text{major}} = 18.444$  min.

### Racemic Sample 3e

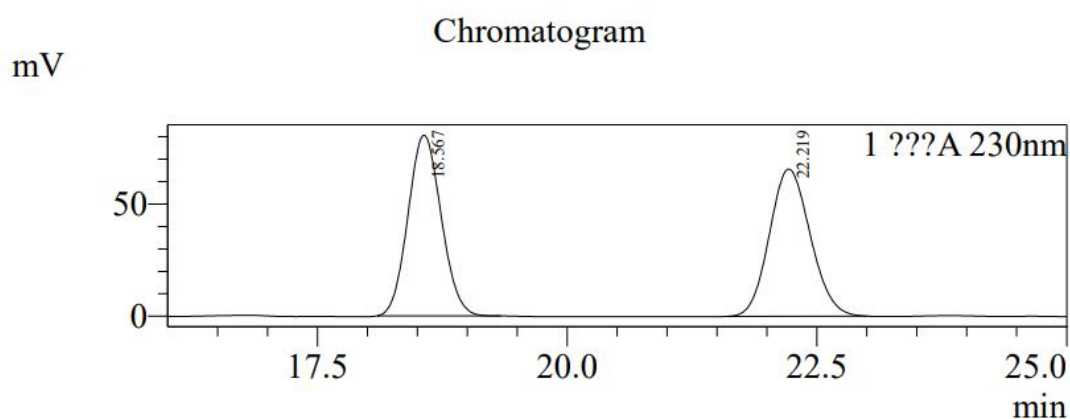

Peak Table

???A 230nm

| Peak# | Ret. Time | Area    | Height | Area%   |
|-------|-----------|---------|--------|---------|
| 1     | 18.567    | 1865395 | 80606  | 49.947  |
| 2     | 22.219    | 1869350 | 65604  | 50.053  |
| Total |           | 3734745 | 146210 | 100.000 |

### Enantiomeric Sample 3e



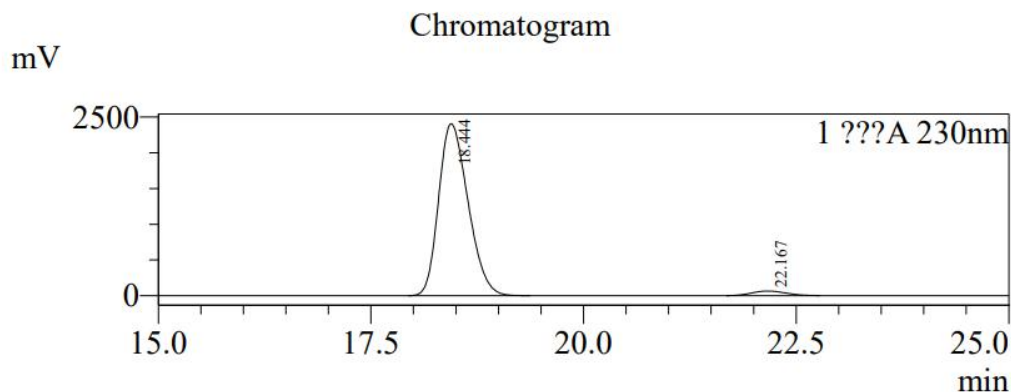

Peak Table

???A 230nm

| Peak# | Ret. Time | Area     | Height  | Area%   |
|-------|-----------|----------|---------|---------|
| 1     | 18.444    | 57838448 | 2406319 | 97.019  |
| 2     | 22.167    | 1777277  | 63743   | 2.981   |
| Total |           | 59615725 | 2470062 | 100.000 |

### Prop-2-yn-1-yl

### 2-(3,5-di-*tert*-butyl-4-hydroxyphenyl)-3-methylene-4-oxopentanoate (**3f**)

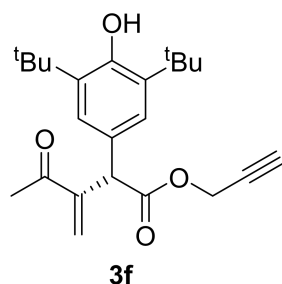

Compound **3f** (36.3 mg, 98% yield) was obtained as a white solid following the *general procedure III* from **1f** (0.1mmol, 30.0 mg) and **2a** (0.15 mmol, 10.5 mg, 12.5  $\mu$ L) stirred for 6 hours.  $^1\text{H NMR}$  (400 MHz,  $\text{CDCl}_3$ )  $\delta$  6.99 (s, 2H), 6.23 (s, 1H), 5.58 (s, 1H), 5.20 (s, 1H), 4.80 (s, 1H), 4.73-4.64 (m, 2H), 2.43-2.42 (m, 1H), 2.40 (s, 3H), 1.41 (s, 18H);  $^{13}\text{C NMR}$  (100 MHz,  $\text{CDCl}_3$ )  $\delta$  198.8, 171.6, 153.3, 147.8, 136.2, 128.5, 125.9, 125.6, 77.6, 74.8, 52.4, 51.6, 34.3, 30.2, 25.8; **Mp**: 103-105  $^\circ\text{C}$ ; **HRMS** Calcd. for  $\text{C}_{23}\text{H}_{29}\text{O}_4^-$  [M-H] $^-$ : 369.2066, found: 369.2066.

$[\alpha]_D^{20} = -100.8$  (c 0.13,  $\text{CH}_2\text{Cl}_2$ ) for 91% ee; Enantiomeric excess was determined by HPLC with a Chiralcel AD-H column, Hexane/*i*PrOH = 95/5, 0.5 mL/min, 230nm,  $t_{\text{minor}} = 19.404$  min,  $t_{\text{major}} = 13.592$  min.

### Racemic Sample 3f

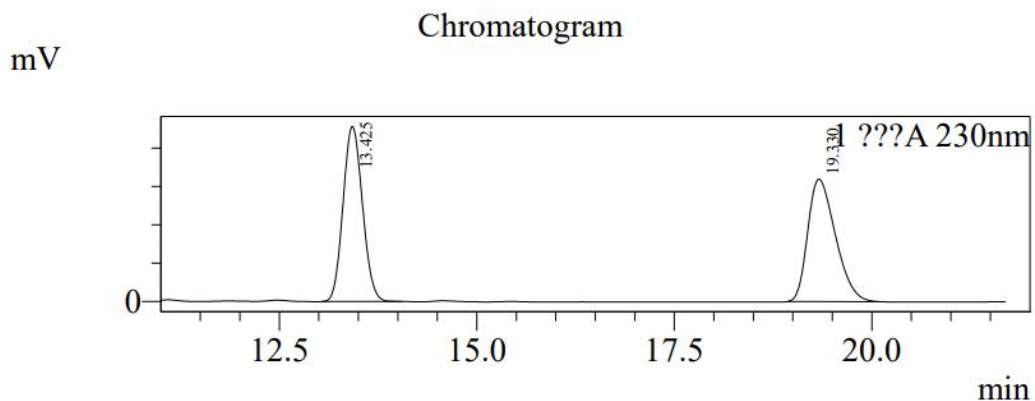

Peak Table

???A 230nm

| Peak# | Ret. Time | Area    | Height | Area%   |
|-------|-----------|---------|--------|---------|
| 1     | 13.425    | 3904637 | 228424 | 50.147  |
| 2     | 19.330    | 3881680 | 159480 | 49.853  |
| Total |           | 7786317 | 387904 | 100.000 |

**Enantiomeric Sample 3f**

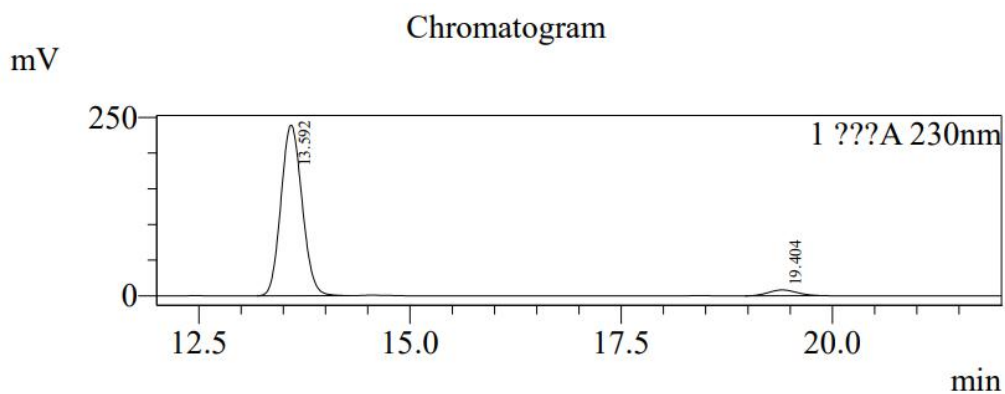

Peak Table

???A 230nm

| Peak# | Ret. Time | Area    | Height | Area%   |
|-------|-----------|---------|--------|---------|
| 1     | 13.592    | 4163916 | 239148 | 95.556  |
| 2     | 19.404    | 193645  | 8198   | 4.444   |
| Total |           | 4357561 | 247346 | 100.000 |

**Benzyl 2-(3,5-di-*tert*-butyl-4-hydroxyphenyl)-3-methylene-4-oxopentanoate (3g)**

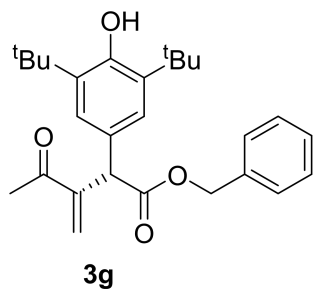

Compound **3g** (24.6 mg, 97% yield) was obtained as a white solid following the *general procedure III* from **1g** (0.06 mmol, 21.5 mg) and **2a** (0.15 mmol, 10.5 mg, 12.5  $\mu$ L) stirred for 6 hours.  $^1\text{H NMR}$  (400 MHz,  $\text{CDCl}_3$ )  $\delta$  7.31-7.27 (m, 4H), 7.26-7.25 (m, 1H), 6.96 (s, 2H), 6.21 (s, 1H), 5.59 (s, 1H), 5.17 (s, 1H), 5.14 (s, 2H), 4.83 (s, 1H), 2.39 (s, 3H), 1.38 (s, 18H);  $^{13}\text{C NMR}$  (100 MHz,  $\text{CDCl}_3$ )  $\delta$  198.9, 172.3, 153.2, 148.0, 136.1, 136.0, 128.4, 128.3, 127.97, 127.95, 126.4, 125.6, 66.5, 51.9, 34.3, 30.2, 25.8; **Mp**: 108-110  $^\circ\text{C}$ ; **HRMS** Calcd. for  $\text{C}_{27}\text{H}_{33}\text{O}_4$   $[\text{M}-\text{H}]^-$ : 421.2379, found: 421.2373.

$[\alpha]_D^{20} = -122.8$  (c 0.22,  $\text{CH}_2\text{Cl}_2$ ) for 94% ee; Enantiomeric excess was determined by HPLC with a Chiralcel AD-H column, Hexane/ $i$ PrOH = 95/5, 0.5 mL/min, 230nm,  $t_{\text{minor}} = 28.510$  min,  $t_{\text{major}} = 14.157$  min.

### Racemic Sample 3g

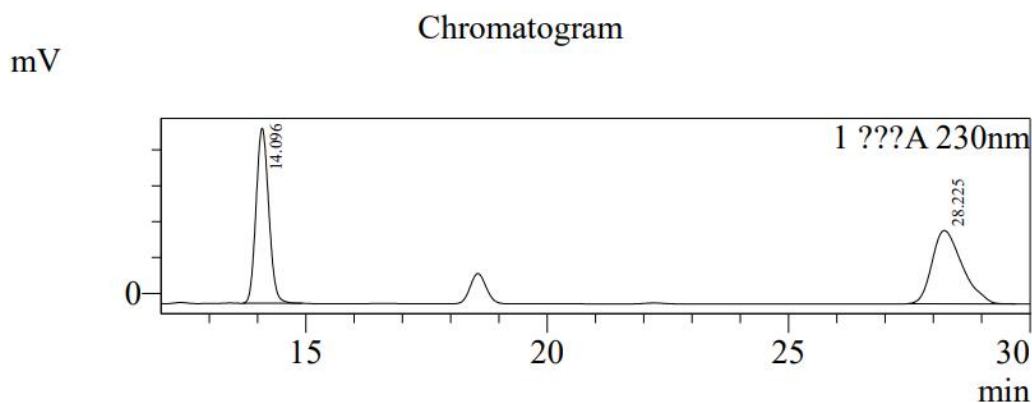

Peak Table

???A 230nm

| Peak# | Ret. Time | Area    | Height | Area%   |
|-------|-----------|---------|--------|---------|
| 1     | 14.096    | 4454080 | 243864 | 50.127  |
| 2     | 28.225    | 4431558 | 102105 | 49.873  |
| Total |           | 8885638 | 345969 | 100.000 |

### Enantiomeric Sample 3g

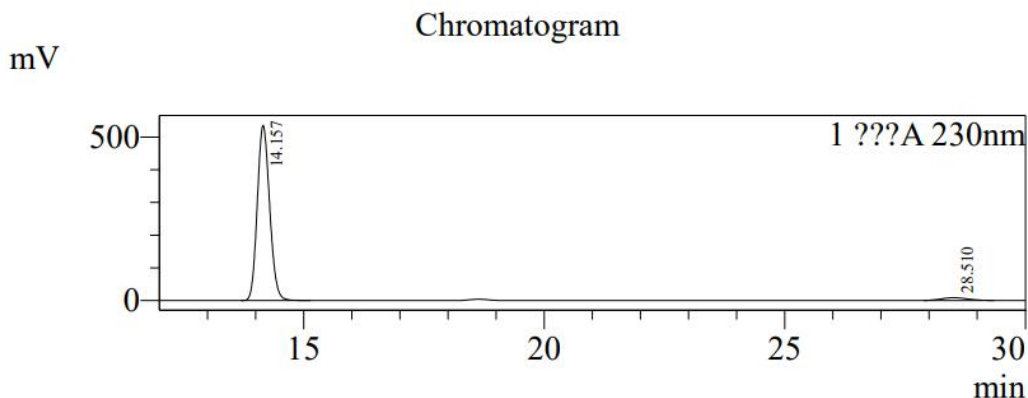

Peak Table

???A 230nm

| Peak# | Ret. Time | Area    | Height | Area%   |
|-------|-----------|---------|--------|---------|
| 1     | 14.157    | 9553896 | 536041 | 96.764  |
| 2     | 28.510    | 319500  | 8429   | 3.236   |
| Total |           | 9873396 | 544470 | 100.000 |

### Benzhydryl

#### (S)-2-(3,5-di-*tert*-butyl-4-hydroxyphenyl)-3-methylene-4-oxopentanoate (**3h**)

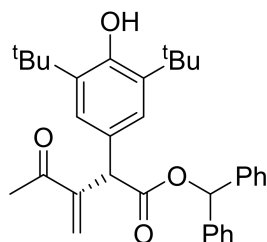

**3h**

Compound **3h** (41.8 mg, 84% yield) was obtained as a white solid following the *general procedure III* from **1h** (0.1 mmol, 42.8 mg) and **2a** (0.15 mmol, 10.5 mg, 12.5  $\mu$ L) stirred for 6 hours.  $^1\text{H NMR}$  (400 MHz,  $\text{CDCl}_3$ )  $\delta$  7.33-7.28 (m, 5H), 7.21-7.20 (m, 3H), 7.11-7.09 (m, 2H), 6.93 (s, 2H), 6.86 (s, 1H), 6.21 (s, 1H), 5.63 (s, 1H), 5.16 (s, 1H), 4.96 (s, 1H), 2.36 (s, 3H), 1.36 (s, 18H);  $^{13}\text{C NMR}$  (100 MHz,  $\text{CDCl}_3$ )  $\delta$  198.8, 171.3, 153.1, 147.7, 140.0, 139.8, 136.0, 128.4, 128.2, 128.0, 127.8, 127.6, 127.2, 127.0, 126.3, 125.6, 77.2, 51.9, 34.3, 30.2, 25.8; **Mp**: 99-101  $^\circ\text{C}$ ; **HRMS** Calcd. for  $\text{C}_{33}\text{H}_{37}\text{O}_4$   $[\text{M}-\text{H}]^-$ : 497.2692, found: 497.2709.

$[\alpha]_{\text{D}}^{20} = -73.6$  (c 0.38,  $\text{CH}_2\text{Cl}_2$ ) for 78% ee; Enantiomeric excess was determined by HPLC with a Chiralcel OD-H column, Hexane/*i*PrOH = 95/5, 0.5 mL/min, 230nm,  $t_{\text{minor}} = 20.419$  min,  $t_{\text{major}} = 11.165$  min.

### Racemic Sample 3h

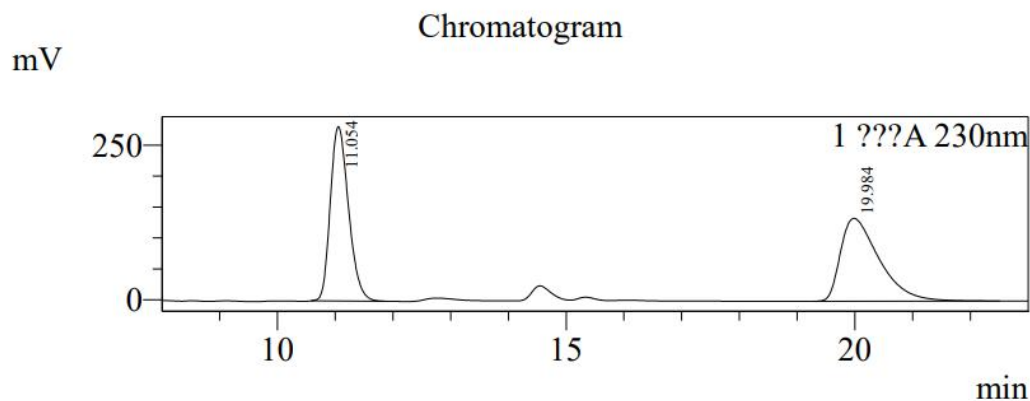

Peak Table

???A 230nm

| Peak# | Ret. Time | Area     | Height | Area%   |
|-------|-----------|----------|--------|---------|
| 1     | 11.054    | 6187971  | 282085 | 49.758  |
| 2     | 19.984    | 6248188  | 134032 | 50.242  |
| Total |           | 12436158 | 416117 | 100.000 |

### Enantiomeric Sample 3h

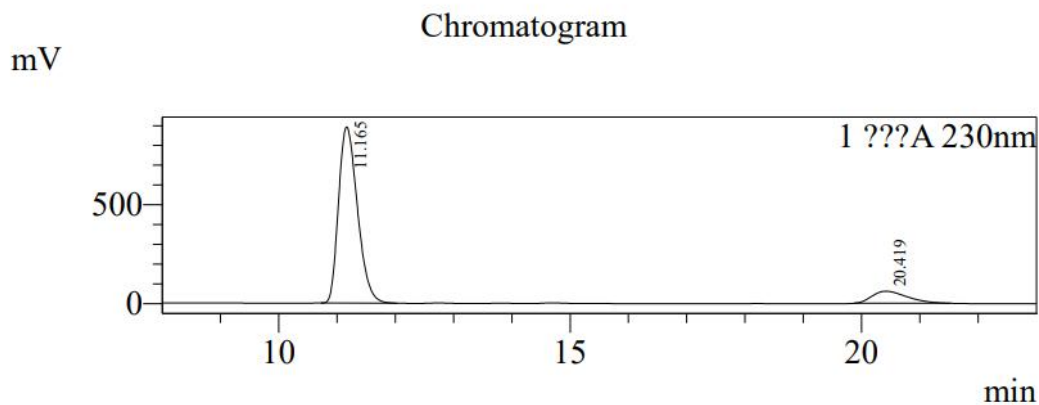

Peak Table

???A 230nm

| Peak# | Ret. Time | Area     | Height | Area%   |
|-------|-----------|----------|--------|---------|
| 1     | 11.165    | 20124349 | 890450 | 88.839  |
| 2     | 20.419    | 2528370  | 60645  | 11.161  |
| Total |           | 22652720 | 951095 | 100.000 |

### **Furan-2-ylmethyl**

**(S)-2-(3,5-di-*tert*-butyl-4-hydroxyphenyl)-3-methylene-4-oxopentanoate (3i)**

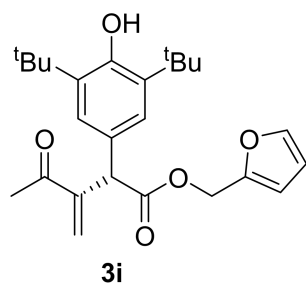

Compound **3i** (20.2 mg, 98% yield) was obtained as a white solid following the *general procedure III* from **1i** (0.05 mmol, 17.1 mg) and **2a** (0.075 mmol, 5.26 mg, 7  $\mu$ L) stirred for 6 hours.  $^1\text{H NMR}$  (400 MHz,  $\text{CDCl}_3$ )  $\delta$  7.36 (t,  $J = 0.8$  Hz, 1H), 6.94 (s, 2H), 6.36 (d,  $J = 2.8$  Hz, 1H), 6.33-6.31(m, 1H), 6.20 (s, 1H), 5.55 (s, 1H), 5.16 (s, 1H), 5.09 (s, 2H), 4.79 (s, 1H), 2.38 (s, 3H), 1.38 (s, 18H);  $^{13}\text{C NMR}$  (100 MHz,  $\text{CDCl}_3$ )  $\delta$  198.8, 172.0, 153.2, 149.5, 148.0, 143.0, 136.0, 128.3, 126.2, 125.6, 110.6, 110.5, 58.5, 51.7, 34.3, 30.2, 25.8; **Mp**: 66-67  $^\circ\text{C}$ ; **HRMS** Calcd. for  $\text{C}_{25}\text{H}_{31}\text{O}_5^-$  [M-H] $^-$ : 411.2171, found: 411.2184.

$[\alpha]_D^{20} = -85.6$  (c 0.13,  $\text{CH}_2\text{Cl}_2$ ) for 92% ee; Enantiomeric excess was determined by HPLC with a Chiralcel AD-H column, Hexane/ $i$ PrOH = 95/5, 0.5 mL/min, 230nm,  $t_{\text{minor}} = 26.416$  min,  $t_{\text{major}} = 18.209$  min.

### Racemic Sample 3i

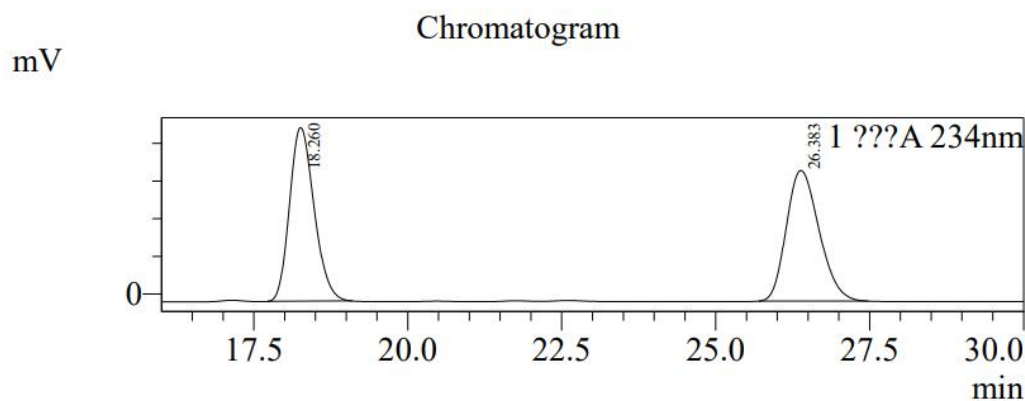

Peak Table

???A 234nm

| Peak# | Ret. Time | Area     | Height | Area%   |
|-------|-----------|----------|--------|---------|
| 1     | 18.260    | 6408256  | 230644 | 49.964  |
| 2     | 26.383    | 6417413  | 173327 | 50.036  |
| Total |           | 12825669 | 403971 | 100.000 |

### Enantiomeric Sample 3i

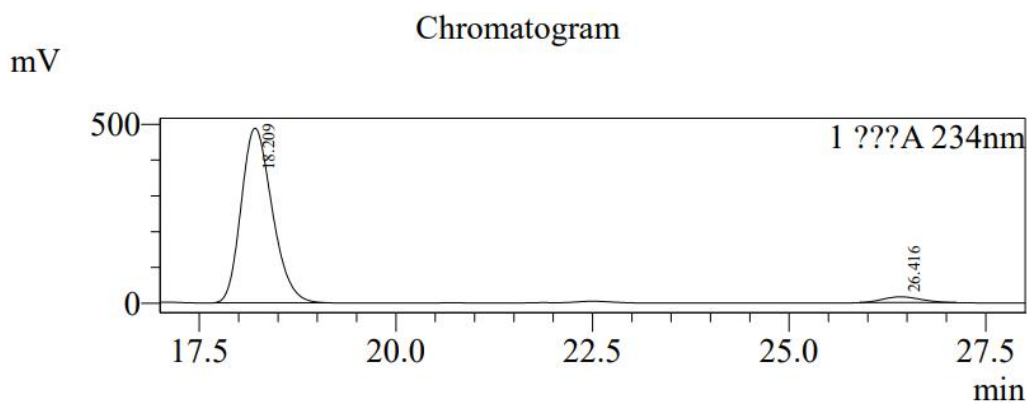

???A 234nm

| Peak# | Ret. Time | Area     | Height | Area%   |
|-------|-----------|----------|--------|---------|
| 1     | 18.209    | 13391237 | 488112 | 96.106  |
| 2     | 26.416    | 542536   | 16117  | 3.894   |
| Total |           | 13933773 | 504229 | 100.000 |

**Phenyl (*S*)-2-(3,5-di-*tert*-butyl-4-hydroxyphenyl)-3-methylene-4-oxopentanoate (3j)**

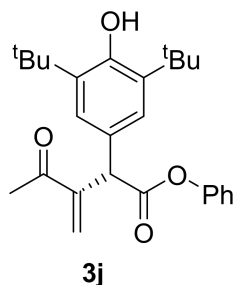

Compound **3j** (18.7 mg, 92% yield) was obtained as a white solid following the *general procedure III* from **1j** (0.05 mmol, 15.4 mg) and **2a** (0.075 mmol, 5.26 mg, 7  $\mu$ L) stirred for 6 hours.  $^1\text{H NMR}$  (400 MHz,  $\text{CDCl}_3$ )  $\delta$  7.35 (t,  $J = 7.6$  Hz, 2H), 7.20 (t,  $J = 7.6$  Hz, 1H), 7.10 (s, 2H), 7.06 (d,  $J = 8.4$  Hz, 2H), 6.27 (s, 1H), 5.63 (s, 1H), 5.24 (s, 1H), 4.95 (s, 1H), 2.44 (s, 3H), 1.44 (s, 18H);  $^{13}\text{C NMR}$  (100 MHz,  $\text{CDCl}_3$ )  $\delta$  199.0, 171.1, 153.4, 151.0, 148.0, 136.3, 129.3, 128.7, 126.0, 125.71, 125.65, 121.5, 52.2, 34.4, 30.3, 25.8; **Mp**: 100-102  $^\circ\text{C}$ ; **HRMS** Calcd. for  $\text{C}_{26}\text{H}_{31}\text{O}_4^-$  [M-H] $^-$ : 407.2228, found: 407.2235.

$[\alpha]_D^{20} = -104.7$  (c 0.12,  $\text{CH}_2\text{Cl}_2$ ) for 91% ee; Enantiomeric excess was determined by HPLC with a Chiralcel AD-H column, Hexane/*i*PrOH = 95/5, 0.5 mL/min, 230nm,  $t_{\text{minor}} = 22.126$  min,  $t_{\text{major}} = 14.505$  min.

**Racemic Sample 3j**



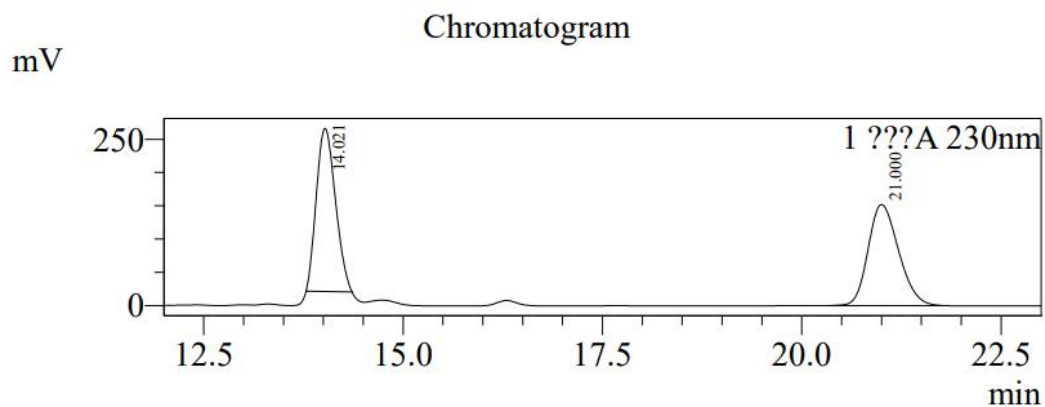

Peak Table

???A 230nm

| Peak# | Ret. Time | Area    | Height | Area%   |
|-------|-----------|---------|--------|---------|
| 1     | 14.021    | 4076636 | 244908 | 50.237  |
| 2     | 21.000    | 4038091 | 151943 | 49.763  |
| Total |           | 8114727 | 396851 | 100.000 |

**Enantiomeric Sample 3j**

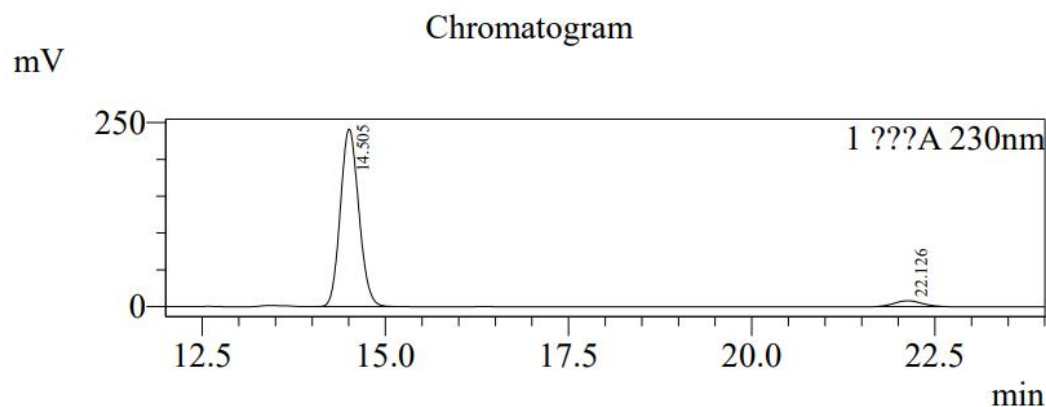

Peak Table

???A 230nm

| Peak# | Ret. Time | Area    | Height | Area%   |
|-------|-----------|---------|--------|---------|
| 1     | 14.505    | 4232976 | 241099 | 95.413  |
| 2     | 22.126    | 203524  | 7871   | 4.587   |
| Total |           | 4436500 | 248969 | 100.000 |

**(S)-2-(3,5-di-*tert*-butyl-4-hydroxyphenyl)-N-ethyl-N-methyl-3-methylene-4-oxo-*nt*anamide (3k)**

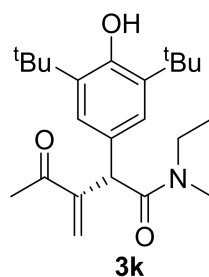



Compound **3k** (21.9 mg, 59% yield) was obtained as a white solid following the *general procedure III* from **1k** (0.05 mmol, 16 mg) and **2a** (0.075 mmol, 5.26 mg, 7  $\mu$ L) stirred for 6 hours.  $^1\text{H NMR}$  (400 MHz,  $\text{CDCl}_3$ )  $\delta$  6.96 (d,  $J = 4.8$  Hz, 2H), 6.13 (d,  $J = 5.6$  Hz, 1H), 5.35 (d,  $J = 32.0$  Hz, 1H), 5.16 (s, 1H), 5.02 (d,  $J = 16.8$  Hz, 1H), 3.67-3.33 (m, 1H), 3.26-3.11 (m, 1H), 2.88 (d,  $J = 5.2$  Hz, 3H), 2.40 (s, 3H), 1.41 (s, 18H), 1.07-0.99 (m, 3H);  $^{13}\text{C NMR}$  (100 MHz,  $\text{CDCl}_3$ )  $\delta$  200.03, 199.98, 171.3, 171.1, 152.9, 152.8, 150.0, 149.8, 136.2, 127.41, 127.36, 127.3, 126.9, 125.7, 125.6, 53.4, 50.0, 49.6, 44.8, 43.0, 35.2, 34.4, 33.0, 30.3, 26.1, 12.7, 12.0; **Mp**: 151-153  $^\circ\text{C}$ ; **HRMS** Calcd. for  $\text{C}_{23}\text{H}_{34}\text{NO}_3^-$   $[\text{M}-\text{H}]^-$ : 372.2539, found: 372.2540.

$[\alpha]_D^{20} = -105.2$  (c 0.13,  $\text{CH}_2\text{Cl}_2$ ) for 85% ee; Enantiomeric excess was determined by HPLC with a Chiralcel AD-H column, Hexane/ $i$ PrOH = 95/5, 0.5 mL/min, 234 nm,  $t_{\text{minor}} = 43.920$  min,  $t_{\text{major}} = 13.580$  min.

### Racemic Sample 3k

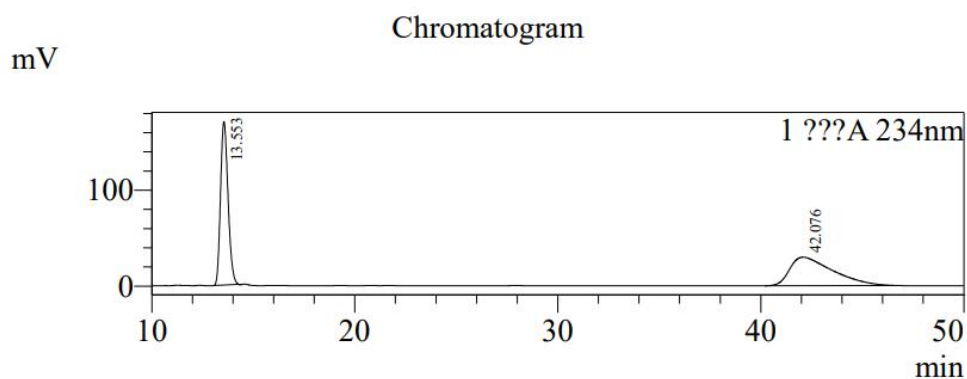

Peak Table

???A 234nm

| Peak# | Ret. Time | Area    | Height | Area%   |
|-------|-----------|---------|--------|---------|
| 1     | 13.553    | 4371257 | 170388 | 49.985  |
| 2     | 42.076    | 4373801 | 29723  | 50.015  |
| Total |           | 8745058 | 200111 | 100.000 |

### Enantiomeric Sample 3k

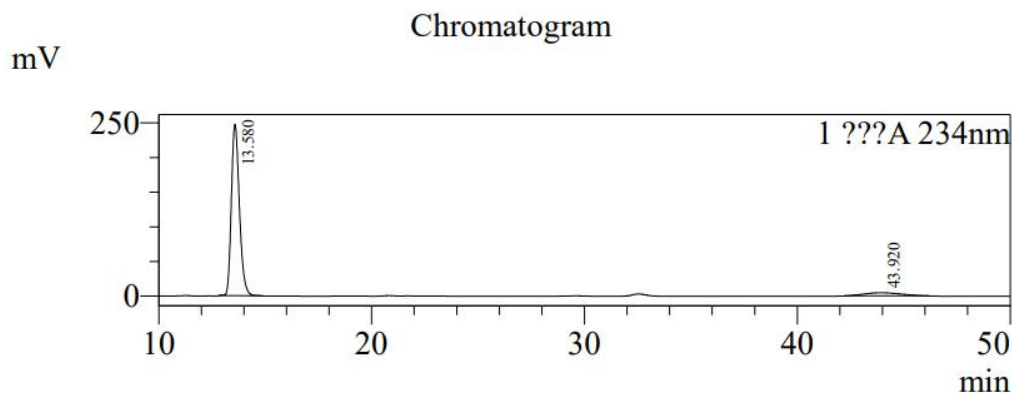

Peak Table

???A 234nm

| Peak# | Ret. Time | Area    | Height | Area%   |
|-------|-----------|---------|--------|---------|
| 1     | 13.580    | 6488205 | 247465 | 92.260  |
| 2     | 43.920    | 544355  | 4511   | 7.740   |
| Total |           | 7032559 | 251976 | 100.000 |

**(S)-2-(3,5-di-*tert*-butyl-4-hydroxyphenyl)-N,N-diethyl-3-methylene-4-oxopentana-  
mide (31)**

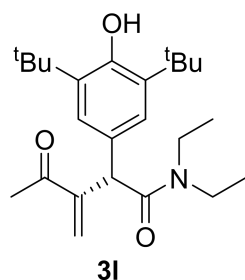

Compound **31** (27.5mg, 71% yield) was obtained as a yellow solid following the *general procedure III* from **11** (0.1 mmol, 31.7 mg) and **2a** (0.15 mmol, 10.5 mg, 12.5  $\mu$ L) stirred for 6 hours.  $^1\text{H NMR}$  (400 MHz,  $\text{CDCl}_3$ )  $\delta$  6.95 (s, 2H), 6.13 (d,  $J = 0.4$  Hz, 1H), 5.31 (d,  $J = 1.6$  Hz, 1H), 5.15 (s, 1H), 5.00 (s, 1H), 3.70-3.61 (m, 1H), 3.35-3.26 (m, 1H), 3.15-2.96 (m, 2H), 2.40 (s, 3H), 1.40 (s, 18H), 1.07 (td,  $J = 7.2, 3.6$  Hz, 6H);  $^{13}\text{C NMR}$  (100 MHz,  $\text{CDCl}_3$ )  $\delta$  200.2, 170.8, 152.9, 150.1, 136.3, 127.6, 127.5, 125.7, 49.9, 42.6, 40.6, 34.5, 30.5, 26.2, 13.7, 12.8; **Mp**: 131-133  $^\circ\text{C}$ ; **HRMS** Calcd. for  $\text{C}_{24}\text{H}_{36}\text{NO}_3^-$  [M-H] $^-$ : 386.2695, found: 386.2701.

$[\alpha]_D^{20} = -115.0$  (c 0.10,  $\text{CH}_2\text{Cl}_2$ ) for 81% ee; Enantiomeric excess was determined by HPLC with a Chiralcel AD-H column, Hexane/*i*PrOH = 95/5, 0.5 mL/min, 230nm,  $t_{\text{minor}} = 19.882$  min,  $t_{\text{major}} = 10.512$  min.

**Racemic Sample 31**

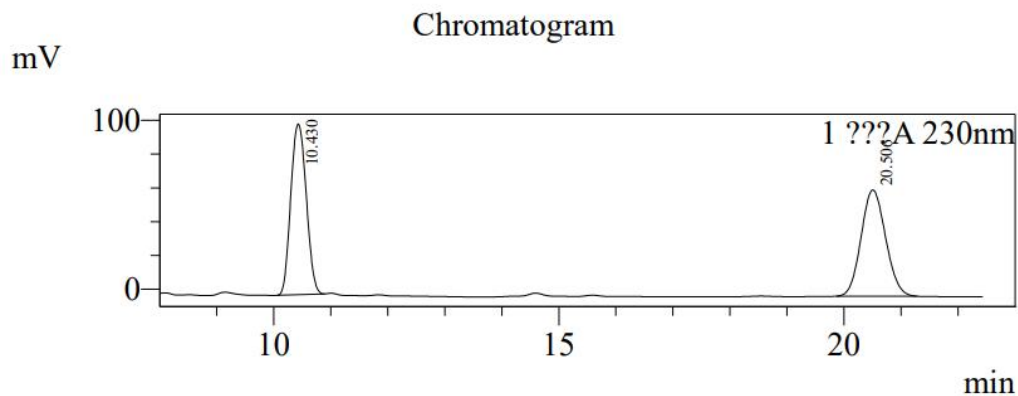

Peak Table

???A 230nm

| Peak# | Ret. Time | Area    | Height | Area%   |
|-------|-----------|---------|--------|---------|
| 1     | 10.430    | 1904710 | 101003 | 50.375  |
| 2     | 20.506    | 1876365 | 62894  | 49.625  |
| Total |           | 3781075 | 163897 | 100.000 |

**Enantiomeric Sample 3l**

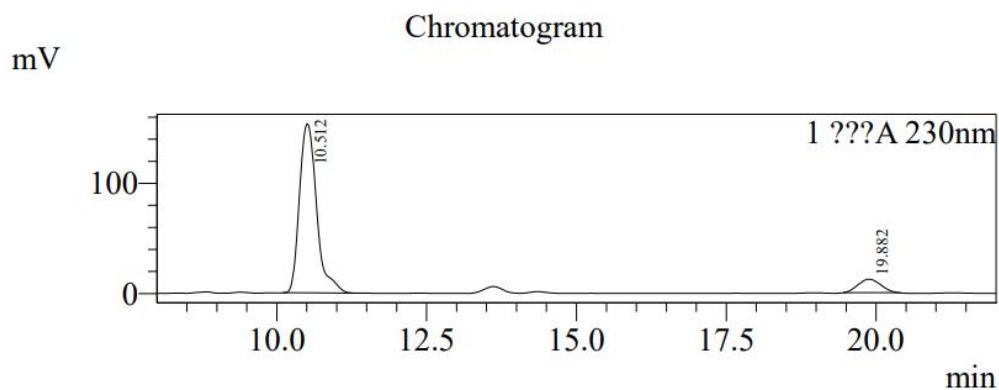

Peak Table

???A 230nm

| Peak# | Ret. Time | Area    | Height | Area%   |
|-------|-----------|---------|--------|---------|
| 1     | 10.512    | 3068306 | 153352 | 90.478  |
| 2     | 19.882    | 322923  | 12222  | 9.522   |
| Total |           | 3391230 | 165574 | 100.000 |

**(S)-N,N-dibutyl-2-(3,5-di-*tert*-butyl-4-hydroxyphenyl)-3-methylene-4-oxopentamide (3m)**

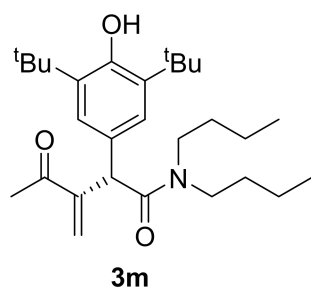

Compound **3m** (43.8 mg, 99% yield) was obtained as a white solid following the *general procedure III* from **1m** (0.1 mmol, 37.3 mg) and **2a** (0.15 mmol, 10.5 mg, 12.5  $\mu$ L) stirred for 6 hours.  $^1\text{H NMR}$  (400 MHz,  $\text{CDCl}_3$ )  $\delta$  6.94 (s, 2H), 6.11 (s, 1H), 5.28 (s, 1H), 5.15 (s, 1H), 4.98 (s, 1H), 3.64-3.57 (m, 1H), 3.25-3.17 (m, 1H), 3.02-2.90 (m, 2H), 2.40 (s, 3H), 1.64-1.58 (m, 1H), 1.56-1.49 (m, 2H), 1.40 (s, 18H), 1.29-1.14 (m, 5H), 0.89-0.83 (m, 6H);  $^{13}\text{C NMR}$  (100 MHz,  $\text{CDCl}_3$ )  $\delta$  200.1, 171.1, 152.8, 150.1, 136.2, 127.6, 127.1, 125.7, 50.3, 48.0, 45.8, 34.3, 30.3, 29.7, 26.1, 20.1, 13.9, 13.8; **Mp**: 114-116  $^\circ\text{C}$ ; **HRMS** Calcd. for  $\text{C}_{28}\text{H}_{44}\text{NO}_3^-$  [M-H] $^-$ : 442.3321, found: 442.3333.

$[\alpha]_D^{20} = -60.5$  (c 0.16,  $\text{CH}_2\text{Cl}_2$ ) for 55% ee; Enantiomeric excess was determined by HPLC with a Chiralcel AD-H column, Hexane/ $i$ PrOH = 95/5, 0.5 mL/min, 230nm,  $t_{\text{minor}} = 11.064$  min,  $t_{\text{major}} = 7.608$  min.

### Racemic Sample 3m

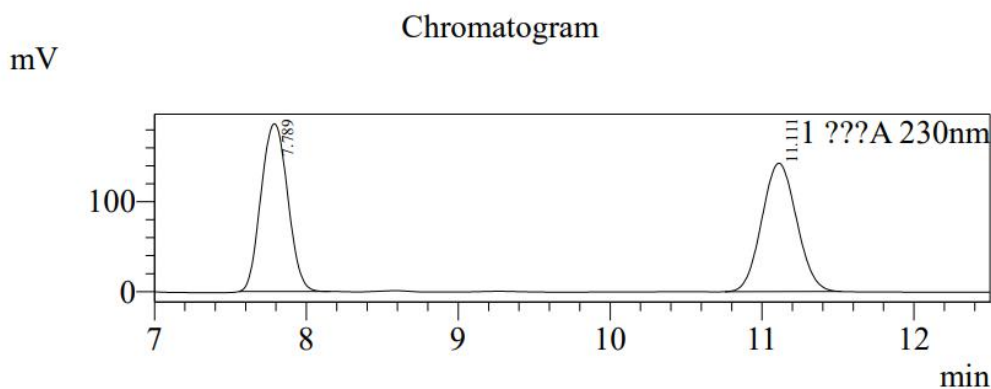

Peak Table

???A 230nm

| Peak# | Ret. Time | Area    | Height | Area%   |
|-------|-----------|---------|--------|---------|
| 1     | 7.789     | 2282418 | 186649 | 50.050  |
| 2     | 11.111    | 2277868 | 142787 | 49.950  |
| Total |           | 4560287 | 329436 | 100.000 |

### Enantiomeric Sample 3m

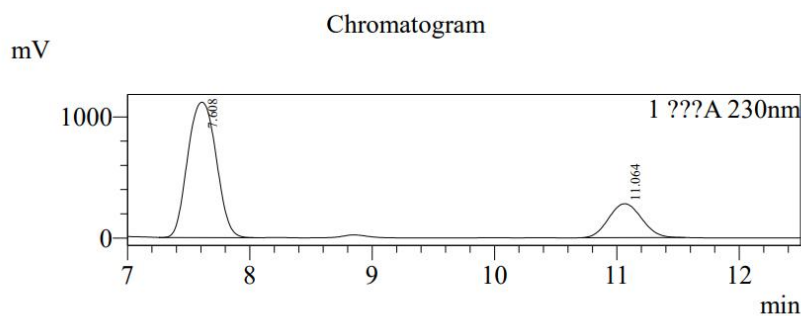

Peak Table

| Peak# | Ret. Time | Area     | Height  | Area%   |
|-------|-----------|----------|---------|---------|
| 1     | 7.608     | 18139881 | 1118302 | 77.543  |
| 2     | 11.064    | 5253294  | 280344  | 22.457  |
| Total |           | 23393175 | 1398646 | 100.000 |

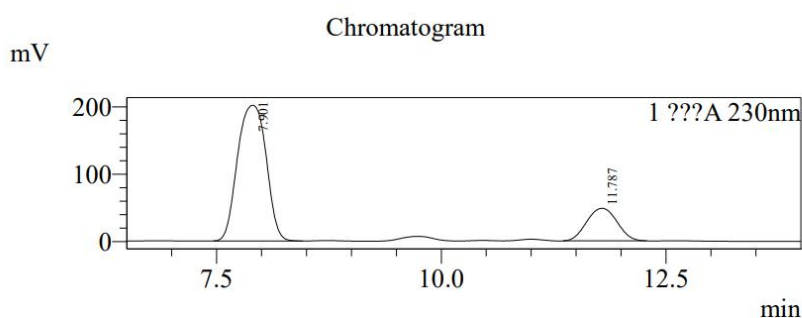

Peak Table

| Peak# | Ret. Time | Area    | Height | Area%   |
|-------|-----------|---------|--------|---------|
| 1     | 7.901     | 4481932 | 201502 | 79.798  |
| 2     | 11.787    | 1134682 | 48334  | 20.202  |
| Total |           | 5616614 | 249837 | 100.000 |

**(S)-2-(3,5-di-*tert*-butyl-4-hydroxyphenyl)-3-methylene-1-morpholinopentane-1,4-dione (3n)**

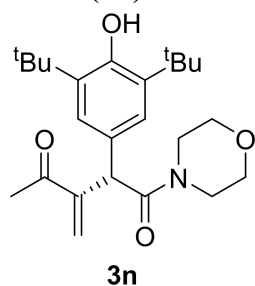

Compound **3n** (21.9 mg, 99% yield) was obtained as a white solid following the *general procedure III* from **1n** (0.05 mmol, 16.6 mg) and **2a** (0.075 mmol, 5.3 mg, 7  $\mu$ L) stirred for 6 hours.  $^1\text{H NMR}$  (400 MHz,  $\text{CDCl}_3$ )  $\delta$  6.93 (s, 2H), 6.17 (s, 1H), 5.35 (s, 1H), 5.20 (s, 1H), 5.01 (s, 1H), 3.83-3.66 (m, 2H), 3.56-3.33 (m, 5H), 3.03 (t,  $J$  = 8.4 Hz, 1H), 2.42 (s, 3H), 1.41 (s, 18H);  $^{13}\text{C NMR}$  (100 MHz,  $\text{CDCl}_3$ )  $\delta$  199.9, 170.3, 153.0, 149.4, 136.5, 127.6, 126.8, 125.6, 66.8, 66.2, 49.6, 46.6, 42.5, 34.4, 30.3, 26.0;

**Mp:** 141-143 °C; **HRMS** Calcd. for C<sub>24</sub>H<sub>34</sub>NO<sub>4</sub><sup>-</sup> [M-H]<sup>-</sup>: 400.2488, found: 400.2498.

[α]<sub>D</sub><sup>20</sup> = -84.4 (c 0.16, CH<sub>2</sub>Cl<sub>2</sub>) for 81% ee; Enantiomeric excess was determined by HPLC with a Chiralcel AD-H column, Hexane/PrOH = 95/5, 0.5 mL/min, 230nm, t<sub>minor</sub> = 54.764 min, t<sub>major</sub> = 28.587 min.

### Racemic Sample 3n

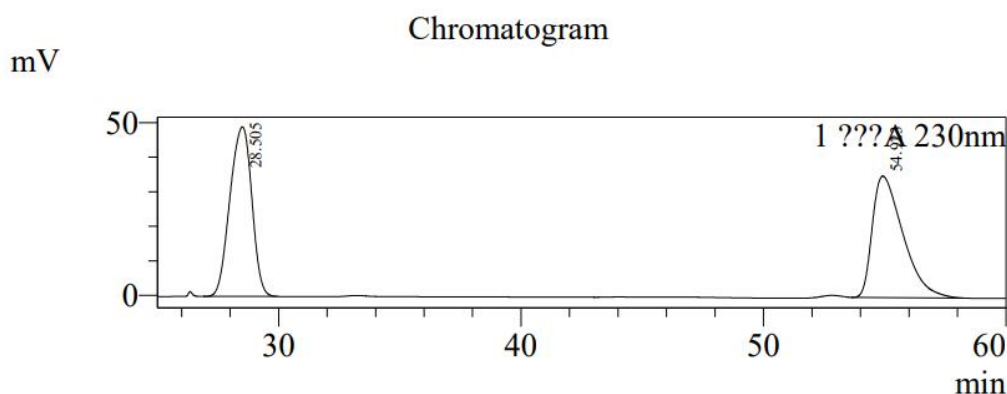

Peak Table

???A 230nm

| Peak# | Ret. Time | Area    | Height | Area%   |
|-------|-----------|---------|--------|---------|
| 1     | 28.505    | 3077414 | 49045  | 49.906  |
| 2     | 54.923    | 3089056 | 35146  | 50.094  |
| Total |           | 6166470 | 84190  | 100.000 |

### Enantiomeric Sample 3n

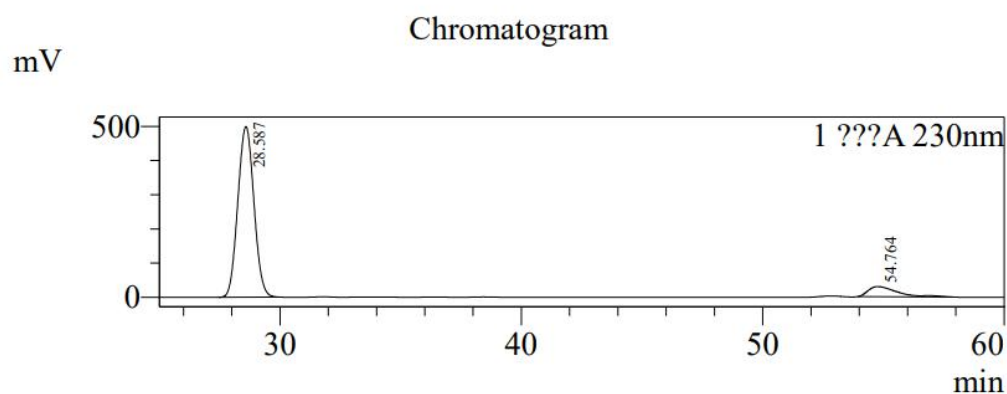

Peak Table

???A 230nm

| Peak# | Ret. Time | Area     | Height | Area%   |
|-------|-----------|----------|--------|---------|
| 1     | 28.587    | 23153758 | 498985 | 90.332  |
| 2     | 54.764    | 2477982  | 29268  | 9.668   |
| Total |           | 25631740 | 528254 | 100.000 |

**(S)-2-(3,5-di-*tert*-butyl-4-hydroxyphenyl)-3-methylene-1-(piperidin-1-yl)pentane-1,4-dione (3o)**

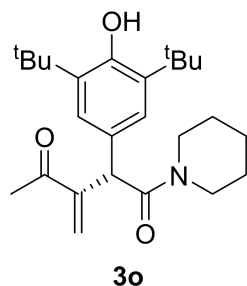

Compound **3o** (20.1 mg, 99% yield) was obtained as a white solid following the *general procedure III* from **1o** (0.05 mmol, 16.45 mg) and **2a** (0.075 mmol, 5.26 mg, 7  $\mu$ L) stirred for 6 hours.  $^1\text{H NMR}$  (400 MHz,  $\text{CDCl}_3$ )  $\delta$  6.94 (s, 2H), 6.12 (s, 1H), 5.33 (s, 1H), 5.16 (s, 1H), 5.06 (s, 1H), 3.84 (d,  $J = 13.2$  Hz, 1H), 3.40 (d,  $J = 13.2$  Hz, 1H), 3.27-3.19 (m, 2H), 2.42 (s, 3H), 1.56-1.49 (m, 4H), 1.40 (s, 18H), 1.38-1.35 (m, 2H);  $^{13}\text{C NMR}$  (100 MHz,  $\text{CDCl}_3$ )  $\delta$  200.1, 169.8, 152.8, 149.9, 136.2, 127.4, 126.9, 125.7, 50.0, 47.2, 43.3, 34.4, 30.3, 26.1, 25.6, 25.3, 24.5; **Mp**: 147-149  $^\circ\text{C}$ ; **HRMS** Calcd. for  $\text{C}_{25}\text{H}_{36}\text{NO}_3^-$  [ $\text{M}-\text{H}$ ] $^-$ : 398.2695, found: 398.2705.

$[\alpha]_{\text{D}}^{20} = -31.3$  (c 0.48,  $\text{CH}_2\text{Cl}_2$ ) for 75% ee; Enantiomeric excess was determined by HPLC with a Chiralcel OD-H column, Hexane/ $i$ PrOH = 99/1, 0.5 mL/min, 230nm,  $t_{\text{minor}} = 31.083$  min,  $t_{\text{major}} = 35.919$  min.

### Racemic Sample 3o

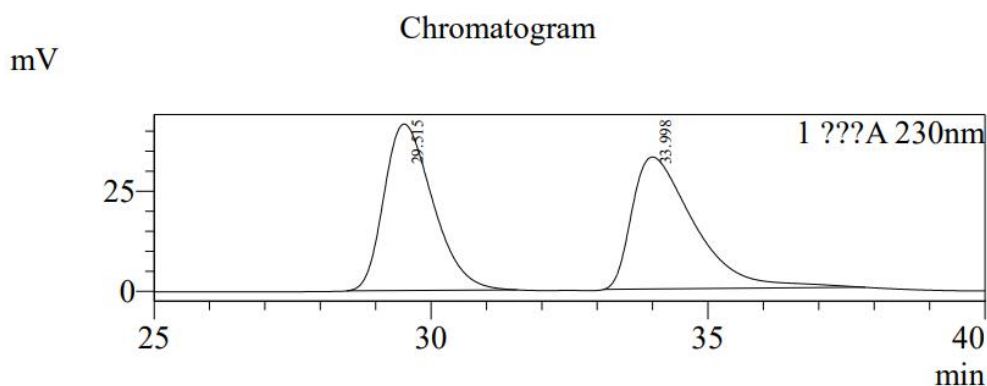

Peak Table

???A 230nm

| Peak# | Ret. Time | Area    | Height | Area%   |
|-------|-----------|---------|--------|---------|
| 1     | 29.515    | 2549499 | 41576  | 49.689  |
| 2     | 33.998    | 2581397 | 32972  | 50.311  |
| Total |           | 5130896 | 74548  | 100.000 |

### Enantiomeric Sample 3o

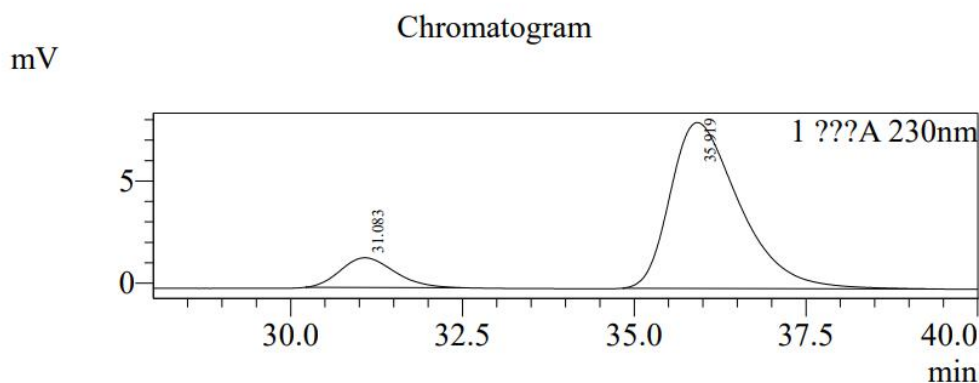

Peak Table

???A 230nm

| Peak# | Ret. Time | Area   | Height | Area%   |
|-------|-----------|--------|--------|---------|
| 1     | 31.083    | 79590  | 1453   | 12.284  |
| 2     | 35.919    | 568346 | 8114   | 87.716  |
| Total |           | 647936 | 9567   | 100.000 |

**(S)-2-(3,5-di-*tert*-butyl-4-hydroxyphenyl)-3-methylene-1-(pyrrolidin-1-yl)pentane-1,4-dione (3p)**

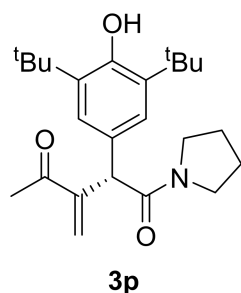

Compound **3p** (10.2 mg, 53% yield) was obtained as a white solid following the *general procedure III* from **1p** (0.05 mmol, 16.5 mg) and **2a** (0.075 mmol, 5.3 mg, 7  $\mu$ L) stirred for 6 hours.  $^1\text{H NMR}$  (400 MHz,  $\text{CDCl}_3$ )  $\delta$  7.03 (s, 2H), 6.17 (s, 1H), 5.48 (s, 1H), 5.16 (s, 1H), 4.90 (s, 1H), 3.69-3.62 (m, 1H), 3.57-3.50 (m, 1H), 3.39-3.33 (m, 1H), 3.26-3.20 (m, 1H), 2.40 (s, 3H), 1.97-1.92 (m, 1H), 1.86-1.74 (m, 3H), 1.42 (s, 18H);  $^{13}\text{C NMR}$  (100 MHz,  $\text{CDCl}_3$ )  $\delta$  199.9, 170.1, 152.9, 149.4, 136.0, 127.8, 127.0, 125.8, 50.9, 46.5, 46.0, 34.3, 30.3, 26.1, 24.3; **Mp**: 155-157  $^\circ\text{C}$ ; **HRMS** Calcd. for  $\text{C}_{24}\text{H}_{34}\text{NO}_3$   $[\text{M}-\text{H}]^-$ : 384.2544, found: 384.2550.

$[\alpha]_D^{20} = -73.3$  (c 0.09,  $\text{CH}_2\text{Cl}_2$ ) for 73% ee; Enantiomeric excess was determined by HPLC with a Chiralcel OD-H column, Hexane/*i*PrOH = 99/1, 0.5 mL/min, 230nm,  $t_{\text{minor}} = 37.907$  min,  $t_{\text{major}} = 41.120$  min.

**Racemic Sample 3p**



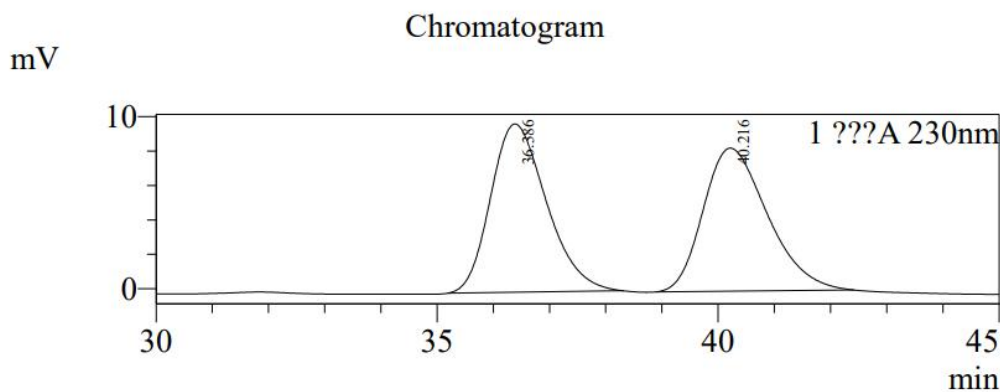

Peak Table

???A 230nm

| Peak# | Ret. Time | Area    | Height | Area%   |
|-------|-----------|---------|--------|---------|
| 1     | 36.386    | 674123  | 9765   | 50.549  |
| 2     | 40.216    | 659480  | 8305   | 49.451  |
| Total |           | 1333603 | 18070  | 100.000 |

### Enantiomeric Sample 3p

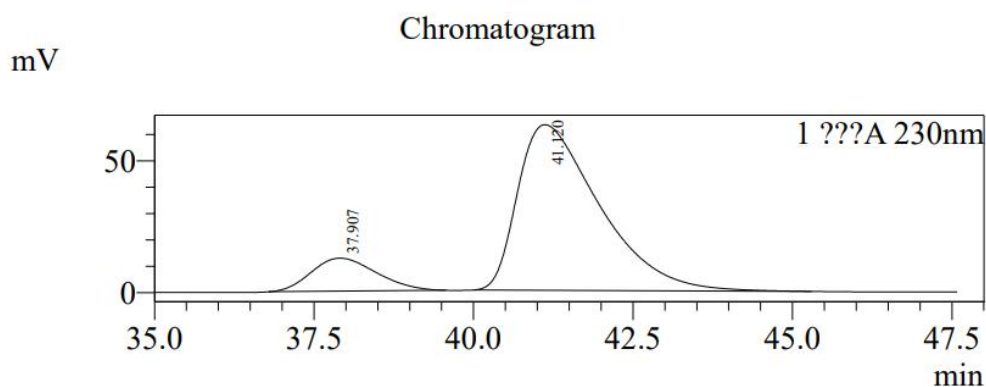

Peak Table

???A 230nm

| Peak# | Ret. Time | Area    | Height | Area%   |
|-------|-----------|---------|--------|---------|
| 1     | 37.907    | 890358  | 12553  | 13.700  |
| 2     | 41.120    | 5608502 | 62908  | 86.300  |
| Total |           | 6498860 | 75461  | 100.000 |

### **(S)-2-(3,5-di-*tert*-butyl-4-hydroxyphenyl)-*N*-methoxy-*N*-methyl-3-methylene-4-oxopentanamide (3q)**

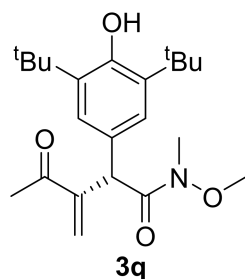

Compound **3q** (21.3 mg, 99% yield) was obtained as a white solid following the *general procedure III* from **1q** (0.05 mmol, 15.3 mg) and **2a** (0.075 mmol, 5.3 mg, 7

$\mu\text{L}$ ) stirred for 6 hours.  $^1\text{H NMR}$  (400 MHz,  $\text{CDCl}_3$ )  $\delta$  7.01 (s, 2H), 6.21 (s, 1H), 5.52 (s, 1H), 5.25 (s, 1H), 5.15 (s, 1H), 3.56 (s, 3H), 3.17 (s, 3H), 2.40 (s, 3H), 1.41 (s, 18H);  $^{13}\text{C NMR}$  (100 MHz,  $\text{CDCl}_3$ )  $\delta$  199.5, 173.1, 152.9, 148.9, 136.0, 128.3, 126.9, 125.8, 60.9, 48.4, 34.3, 30.3, 26.0; **Mp**: 121-123  $^\circ\text{C}$ ; **HRMS** Calcd. for  $\text{C}_{22}\text{H}_{32}\text{NO}_4^-$  [M-H] $^-$ : 374.2337, found: 374.2342.

$[\alpha]_D^{20} = -108.8$  (c 0.16,  $\text{CH}_2\text{Cl}_2$ ) for 91% ee; Enantiomeric excess was determined by HPLC with a Chiralcel AD-H column, Hexane/*i*PrOH = 95/5, 0.5 mL/min, 230nm,  $t_{\text{minor}} = 25.825$  min,  $t_{\text{major}} = 14.922$  min.

### Racemic Sample 3q

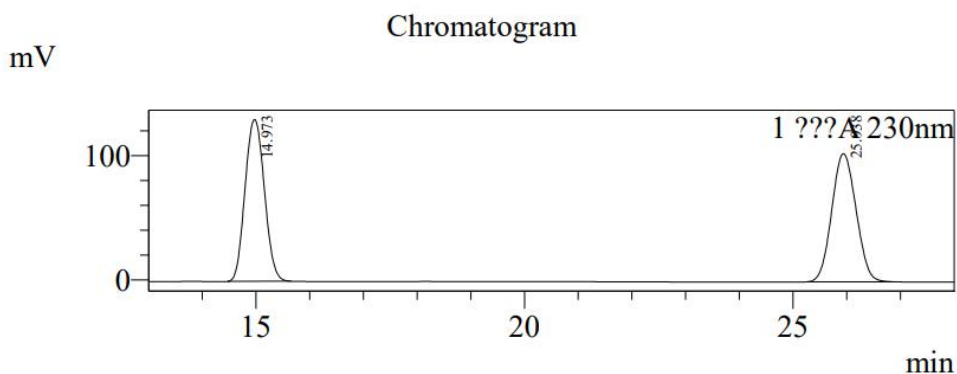

Peak Table

??A 230nm

| Peak# | Ret. Time | Area    | Height | Area%   |
|-------|-----------|---------|--------|---------|
| 1     | 14.973    | 3256441 | 130244 | 50.150  |
| 2     | 25.938    | 3236959 | 103058 | 49.850  |
| Total |           | 6493400 | 233302 | 100.000 |

### Enantiomeric Sample 3q

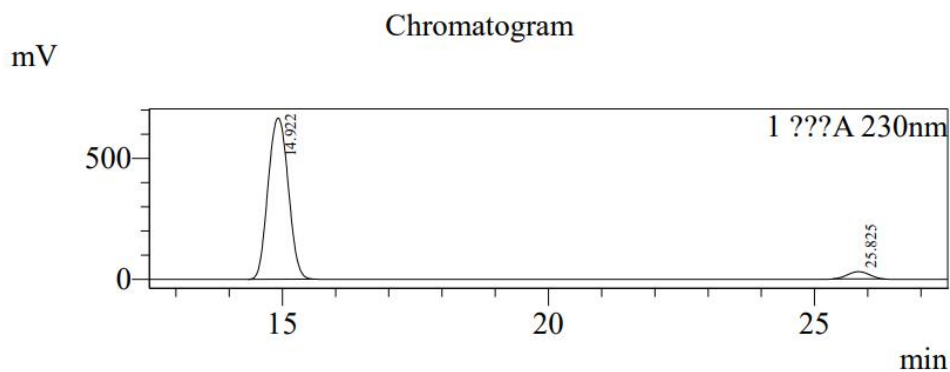

Peak Table

??A 230nm

| Peak# | Ret. Time | Area     | Height | Area%   |
|-------|-----------|----------|--------|---------|
| 1     | 14.922    | 17579680 | 666610 | 95.367  |
| 2     | 25.825    | 854037   | 30085  | 4.633   |
| Total |           | 18433717 | 696695 | 100.000 |

### S-phenyl

### (S)-2-(3,5-di-*tert*-butyl-4-hydroxyphenyl)-3-methylene-4-oxopentane-thioate (**3r**)

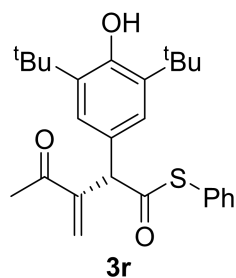

Compound **3r** (8.4 mg, 47% yield) was obtained as a yellow viscous liquid following the *general procedure III* from **1r** (0.042 mmol, 14.75 mg) and **2a** (0.063 mmol, 4.4 mg, 5.3  $\mu$ L) stirred for 6 hours.  $^1\text{H NMR}$  (400 MHz,  $\text{CDCl}_3$ )  $\delta$  7.38 (s, 5H), 7.01 (s, 2H), 6.26 (s, 1H), 5.75 (d,  $J = 1.2$  Hz, 1H), 5.22 (s, 1H), 5.19 (s, 1H), 2.39 (s, 3H), 1.42 (s, 18H);  $^{13}\text{C NMR}$  (100 MHz,  $\text{CDCl}_3$ )  $\delta$  198.4, 197.0, 153.4, 147.5, 136.1, 134.6, 129.3, 129.1, 128.8, 128.2, 126.0, 125.9, 58.6, 34.4, 30.3, 25.9; **HRMS** Calcd. for  $\text{C}_{26}\text{H}_{31}\text{O}_3\text{S}^-$  [ $\text{M}-\text{H}$ ]: 423.1999, found: 423.2009.

$[\alpha]_{\text{D}}^{20} = -68.1$  (c 0.12,  $\text{CH}_2\text{Cl}_2$ ) for 82% ee; Enantiomeric excess was determined by HPLC with a Chiralcel AD-H column, Hexane/ $i$ PrOH = 95/5, 0.5 mL/min, 230 nm,  $t_{\text{minor}} = 16.993$  min,  $t_{\text{major}} = 11.776$  min.

### Racemic Sample 3r

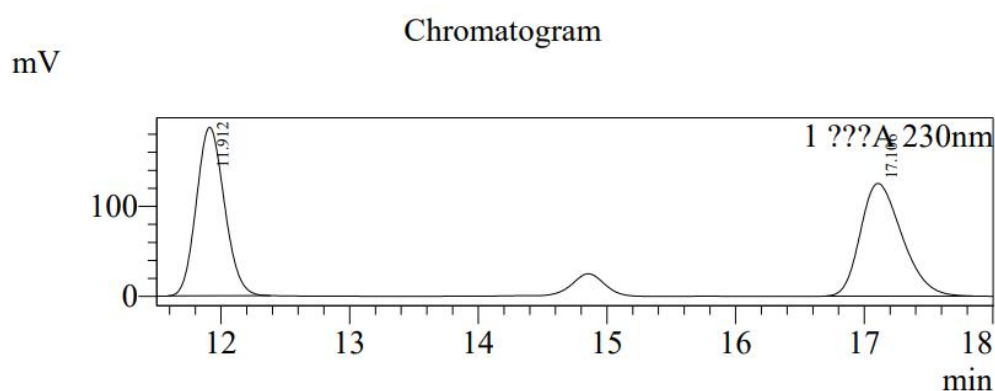

Peak Table

| Peak# | Ret. Time | Area    | Height | Area%   |
|-------|-----------|---------|--------|---------|
| 1     | 11.912    | 2841123 | 187004 | 50.257  |
| 2     | 17.106    | 2812060 | 125068 | 49.743  |
| Total |           | 5653184 | 312072 | 100.000 |

### Enantiomeric Sample 3r

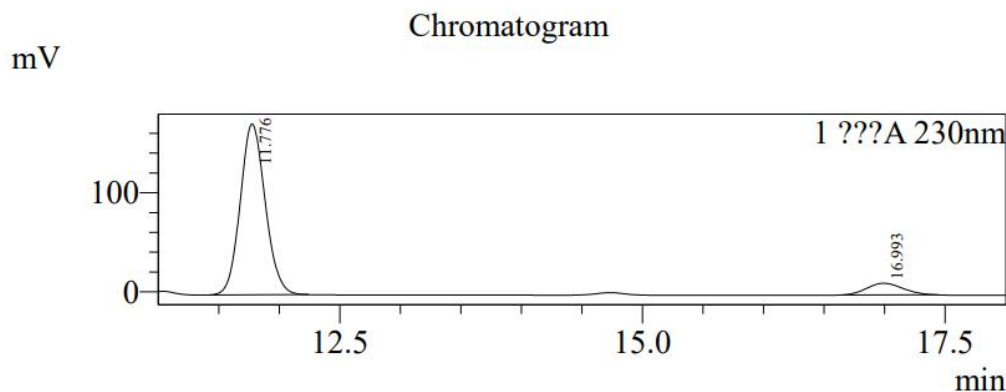

Peak Table

???A 230nm

| Peak# | Ret. Time | Area    | Height | Area%   |
|-------|-----------|---------|--------|---------|
| 1     | 11.776    | 2479919 | 172628 | 91.067  |
| 2     | 16.993    | 243273  | 11767  | 8.933   |
| Total |           | 2723192 | 184395 | 100.000 |

### **S**-benzyl

### **(S)**-2-(3,5-di-*tert*-butyl-4-hydroxyphenyl)-3-methylene-4-oxopentane-thioate (**3s**)

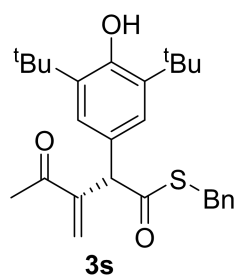

Compound **3s** (10.5 mg, 32% yield) was obtained as a yellow viscous liquid following the *general procedure III* from **1u** (0.076 mmol, 27.8 mg) and **2a** (0.09 mmol, 6.3 mg, 7.5  $\mu$ L) stirred for 6 hours.  $^1\text{H NMR}$  (400 MHz,  $\text{CDCl}_3$ )  $\delta$  7.25-7.20 (m, 5H), 6.96 (s, 2H), 6.27 (s, 1H), 5.71 (d,  $J = 1.2$  Hz, 1H), 5.18 (s, 1H), 5.10 (s, 1H), 4.17 (d,  $J = 14.0$  Hz, 1H), 4.05 (d,  $J = 14.0$  Hz, 1H), 2.40 (s, 3H), 1.38 (s, 18H);  $^{13}\text{C NMR}$  (100 MHz,  $\text{CDCl}_3$ )  $\delta$  198.4, 198.0, 153.3, 147.5, 137.6, 136.0, 129.0, 128.8, 128.5, 127.1, 126.3, 125.7, 58.9, 34.3, 33.5, 30.2, 25.9; **HRMS** Calcd. for  $\text{C}_{27}\text{H}_{33}\text{O}_3\text{S}^-$  [M-H]: 437.2156, found: 437.2162.

$[\alpha]_D^{20} = -13.1$  (c 0.54,  $\text{CH}_2\text{Cl}_2$ ) for 84% ee; Enantiomeric excess was determined by HPLC with a Chiralcel AD-H column, Hexane/*i*PrOH = 95/5, 0.5 mL/min, 230nm,  $t_{\text{minor}} = 27.489$  min,  $t_{\text{major}} = 12.685$  min.

### **Racemic Sample 3s**

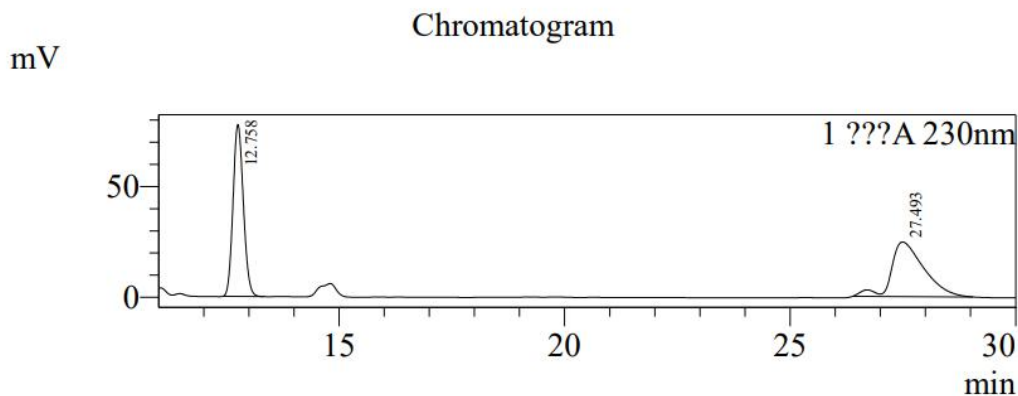

Peak Table

???A 230nm

| Peak# | Ret. Time | Area    | Height | Area%   |
|-------|-----------|---------|--------|---------|
| 1     | 12.758    | 1240664 | 77635  | 50.043  |
| 2     | 27.493    | 1238531 | 24625  | 49.957  |
| Total |           | 2479195 | 102259 | 100.000 |

### Enantiomeric Sample 3s

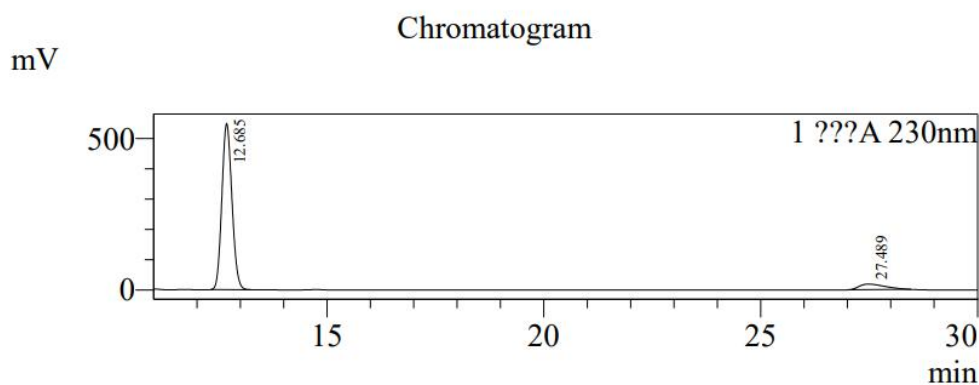

Peak Table

???A 230nm

| Peak# | Ret. Time | Area    | Height | Area%   |
|-------|-----------|---------|--------|---------|
| 1     | 12.685    | 8899540 | 548362 | 92.012  |
| 2     | 27.489    | 772576  | 18531  | 7.988   |
| Total |           | 9672116 | 566893 | 100.000 |

### **Methyl (S)-2-(3,5-di-*tert*-butyl-4-hydroxyphenyl)-3-methylene-4-oxohexanoate (3t)**

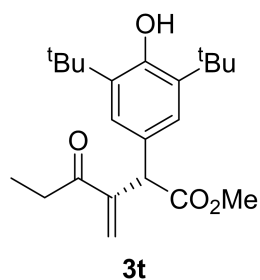

Compound **3t** (28.9 mg, 94% yield) was obtained as a white solid following the

general procedure III from **1a** (0.1 mmol, 27.6 mg) and **2b** (0.15 mmol, 12.6 mg, 14.8  $\mu\text{L}$ ) stirred for 6 hours.  $^1\text{H NMR}$  (400 MHz,  $\text{CDCl}_3$ )  $\delta$  6.99 (s, 2H), 6.21 (s, 1H), 5.51 (d,  $J = 1.2$  Hz, 1H), 4.78 (s, 1H), 3.69 (s, 3H), 2.78 (q,  $J = 7.2$  Hz, 2H), 1.41 (s, 18H), 1.12 (t,  $J = 7.2$  Hz, 3H);  $^{13}\text{C NMR}$  (100 MHz,  $\text{CDCl}_3$ )  $\delta$  201.6, 173.1, 153.2, 147.6, 136.1, 126.9, 126.5, 125.6, 52.2, 52.0, 34.3, 30.8, 30.2, 8.2; **Mp**: 92-94  $^\circ\text{C}$ ; **HRMS** Calcd. for  $\text{C}_{22}\text{H}_{33}\text{O}_4^+ [\text{M}+\text{H}]^+$ : 361.2373, found: 361.2379.

$[\alpha]_{\text{D}}^{20} = -125.2$  (c 0.14,  $\text{CH}_2\text{Cl}_2$ ) for 90% ee; Enantiomeric excess was determined by HPLC with a Chiralcel AD-H column, Hexane/*i*PrOH = 95/5, 0.5 mL/min, 230nm,  $t_{\text{minor}} = 10.759$  min,  $t_{\text{major}} = 15.462$  min.

### Racemic Sample 3t

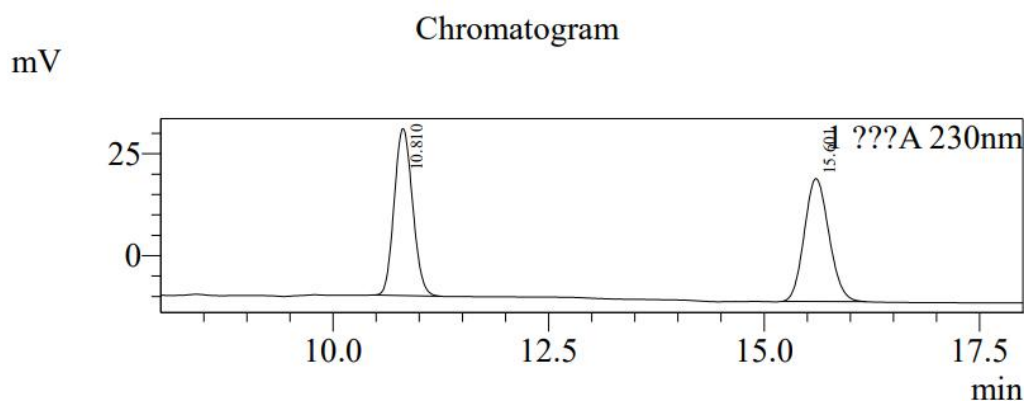

Peak Table

???A 230nm

| Peak# | Ret. Time | Area    | Height | Area%   |
|-------|-----------|---------|--------|---------|
| 1     | 10.810    | 606309  | 40986  | 50.317  |
| 2     | 15.601    | 598659  | 30130  | 49.683  |
| Total |           | 1204968 | 71116  | 100.000 |

### Enantiomeric Sample 3t

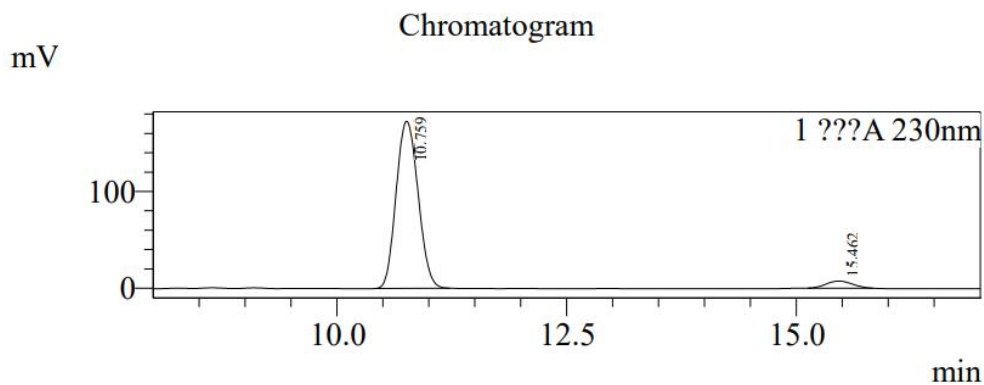

Peak Table

???A 230nm

| Peak# | Ret. Time | Area    | Height | Area%   |
|-------|-----------|---------|--------|---------|
| 1     | 10.759    | 2869975 | 172716 | 95.187  |
| 2     | 15.462    | 145129  | 7302   | 4.813   |
| Total |           | 3015104 | 180018 | 100.000 |

**Ethyl (*S*)-2-(3,5-di-*tert*-butyl-4-hydroxyphenyl)-3-methylene-4-oxohexanoate (**3u**)**

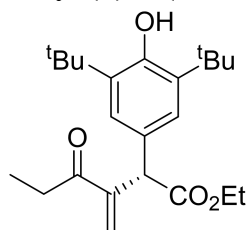

**3u**

Compound **3u** (30.7 mg, 82% yield) was obtained as a white solid following the *general procedure III* from **1b** (0.1 mmol, 30.6 mg) and **2b** (0.15 mmol, 12.6 mg, 15  $\mu$ L) stirred for 6 hours.  $^1\text{H NMR}$  (400 MHz,  $\text{CDCl}_3$ )  $\delta$  6.98 (s, 2H), 6.20 (s, 1H), 5.49 (d,  $J = 1.6$  Hz, 1H), 5.18 (s, 1H), 4.76 (s, 1H), 4.22-4.08 (m, 2H), 2.78 (q,  $J = 7.2$  Hz, 2H), 1.41 (s, 18H), 1.23 (t,  $J = 7.2$  Hz, 3H), 1.12 (t,  $J = 7.2$  Hz, 3H);  $^{13}\text{C NMR}$  (100 MHz,  $\text{CDCl}_3$ )  $\delta$  201.6, 172.5, 153.1, 147.8, 136.0, 126.9, 126.6, 125.5, 61.0, 52.2, 34.3, 30.8, 30.2, 14.1, 8.3; **Mp**: 65-67  $^\circ\text{C}$ ; **HRMS** Calcd. for  $\text{C}_{22}\text{H}_{33}\text{O}_4$   $[\text{M}-\text{H}]^-$ : 373.2384, found: 373.2390.

$[\alpha]_D^{20} = -92.4$  (c 0.15,  $\text{CH}_2\text{Cl}_2$ ) for 91% ee; Enantiomeric excess was determined by HPLC with a Chiralcel AD-H column, Hexane/*i*PrOH = 95/5, 0.5 mL/min, 230nm,  $t_{\text{minor}} = 12.749$  min,  $t_{\text{major}} = 9.759$  min.

**Racemic Sample 3u**



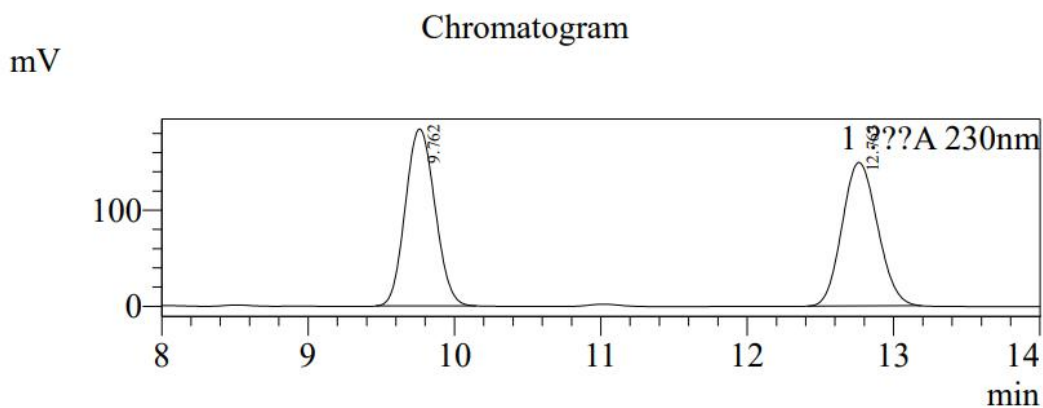

Peak Table

???A 230nm

| Peak# | Ret. Time | Area    | Height | Area%   |
|-------|-----------|---------|--------|---------|
| 1     | 9.762     | 2598217 | 184158 | 50.805  |
| 2     | 12.763    | 2515854 | 149360 | 49.195  |
| Total |           | 5114070 | 333518 | 100.000 |

### Enantiomeric Sample 3u

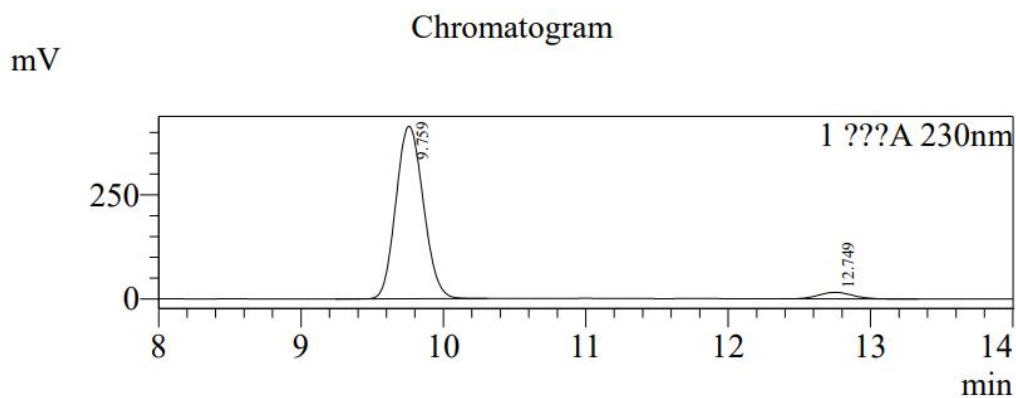

Peak Table

???A 230nm

| Peak# | Ret. Time | Area    | Height | Area%   |
|-------|-----------|---------|--------|---------|
| 1     | 9.759     | 5564462 | 414562 | 95.581  |
| 2     | 12.749    | 257267  | 15607  | 4.419   |
| Total |           | 5821730 | 430169 | 100.000 |

### **Methyl (S)-3-benzoyl-2-(3,5-di-*tert*-butyl-4-hydroxyphenyl)but-3-enoate (3v)**

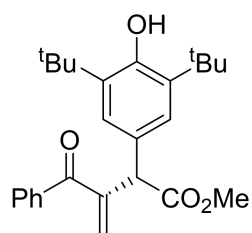

**3v**

Compound **3v** (36.2 mg, 89% yield) was obtained as a white solid following the



*general procedure III* from **1a** (0.1 mmol, 27.6 mg) and **2c** (0.15 mmol, 19.8 mg, 19  $\mu\text{L}$ ) stirred for 6 hours.  $^1\text{H NMR}$  (400 MHz,  $\text{CDCl}_3$ )  $\delta$  7.82 (d,  $J = 7.6$  Hz, 2H), 7.54 (t,  $J = 7.6$  Hz, 1H), 7.44 (t,  $J = 7.6$  Hz, 2H), 7.09 (s, 2H), 5.80 (s, 1H), 5.58 (s, 1H), 5.22 (s, 1H), 5.06 (s, 1H), 3.69 (s, 3H), 1.44 (s, 18H);  $^{13}\text{C NMR}$  (100 MHz,  $\text{CDCl}_3$ )  $\delta$  197.6, 173.0, 153.3, 147.3, 137.5, 136.2, 132.3, 129.7, 128.5, 128.1, 126.3, 125.7, 53.0, 52.3, 34.3, 30.3; **Mp**: 136-138  $^\circ\text{C}$ ; **HRMS** Calcd. for  $\text{C}_{26}\text{H}_{33}\text{O}_4^+$   $[\text{M}+\text{H}]^+$ : 409.2373, found: 409.2378.

$[\alpha]_{\text{D}}^{20} = -12.8$  (c 0.13,  $\text{CH}_2\text{Cl}_2$ ) for 20% ee; Enantiomeric excess was determined by HPLC with a Chiralcel AD-H column, Hexane/*i*PrOH = 95/5, 0.5 mL/min, 230nm,  $t_{\text{minor}} = 25.423$  min,  $t_{\text{major}} = 12.923$  min.

### Racemic Sample 3v

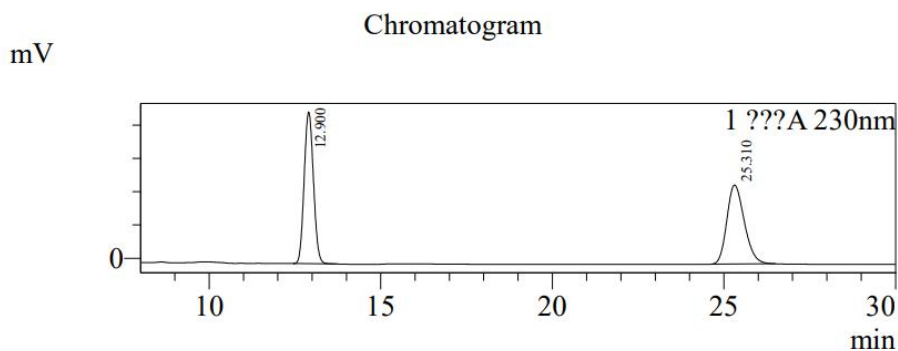

Peak Table

| ???A 230nm |           |         |        |         |
|------------|-----------|---------|--------|---------|
| Peak#      | Ret. Time | Area    | Height | Area%   |
| 1          | 12.900    | 4278375 | 227685 | 50.517  |
| 2          | 25.310    | 4190744 | 118559 | 49.483  |
| Total      |           | 8469119 | 346244 | 100.000 |

### Enantiomeric Sample 3v

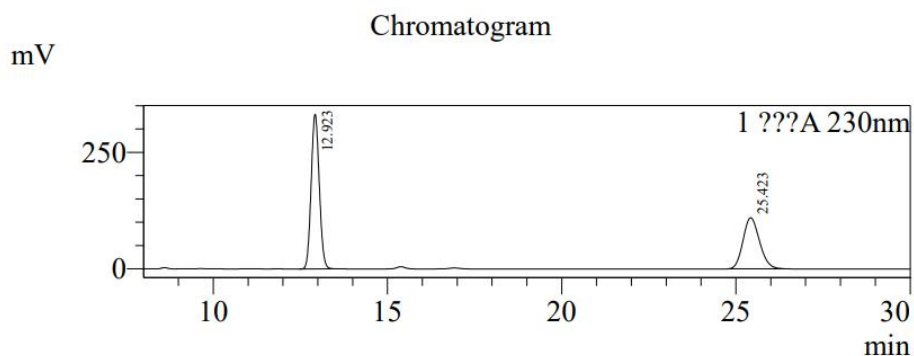

| Peak# | Ret. Time | Area    | Height | Area%   |
|-------|-----------|---------|--------|---------|
| 1     | 12.923    | 5368095 | 331709 | 59.852  |
| 2     | 25.423    | 3600819 | 109540 | 40.148  |
| Total |           | 8968914 | 441248 | 100.000 |

**Methyl (*S*)-2-(3,5-di-*tert*-butyl-4-hydroxyphenyl)-3-formylbut-3-enoate (**3w**)**

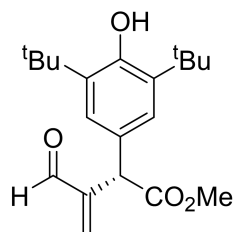

**3w**

Compound **3w** (16 mg, 96% yield) was obtained as a white solid following the *general procedure III* from **1a** (0.05 mmol, 13.8 mg) and acrolein **2d** (0.075 mmol, 4.2 mg, 5  $\mu$ L) stirred for 6 hours.  $^1\text{H NMR}$  (400 MHz,  $\text{CDCl}_3$ )  $\delta$  9.60 (s, 1H), 7.03 (s, 2H), 6.20 (d,  $J = 9.6$  Hz, 2H), 5.20 (s, 1H), 4.70 (s, 1H), 3.71 (s, 3H), 1.42 (s, 18H);  $^{13}\text{C NMR}$  (100 MHz,  $\text{CDCl}_3$ )  $\delta$  193.2, 172.2, 153.3, 148.7, 136.6, 136.2, 125.8, 125.3, 52.4, 49.6, 34.4, 30.2; **Mp**: 131-134  $^\circ\text{C}$ ; **HRMS** Calcd. for  $\text{C}_{20}\text{H}_{29}\text{O}_4^+$   $[\text{M}+\text{H}]^+$ : 333.2066, found: 333.2065.

$[\alpha]_{\text{D}}^{20} = -74.1$  (c 0.32,  $\text{CH}_2\text{Cl}_2$ ) for 86% ee; Enantiomeric excess was determined by HPLC with a Chiralcel AD-H column, Hexane/*i*PrOH = 95/5, 0.5 mL/min, 230nm,  $t_{\text{minor}} = 11.231$  min,  $t_{\text{major}} = 10.565$  min.

**Racemic Sample 3w**

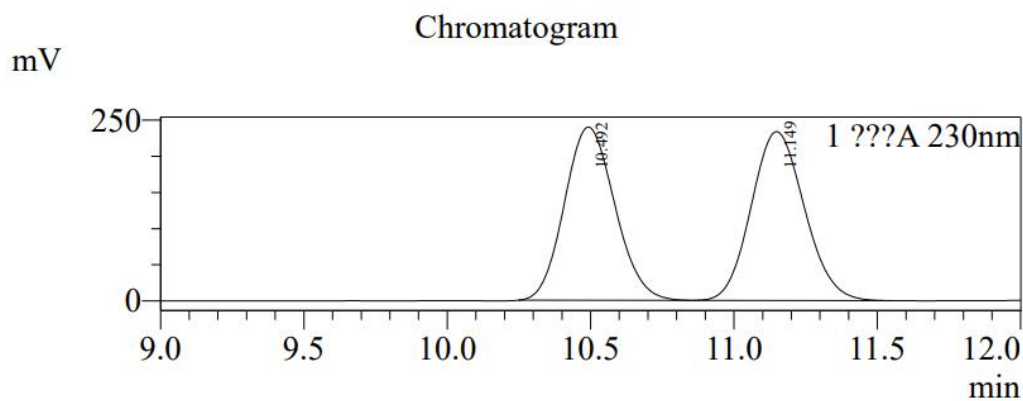

Peak Table

???A 230nm

| Peak# | Ret. Time | Area    | Height | Area%   |
|-------|-----------|---------|--------|---------|
| 1     | 10.492    | 2930001 | 239888 | 49.275  |
| 2     | 11.149    | 3016259 | 233636 | 50.725  |
| Total |           | 5946260 | 473524 | 100.000 |

**Enantiomeric Sample 3w**

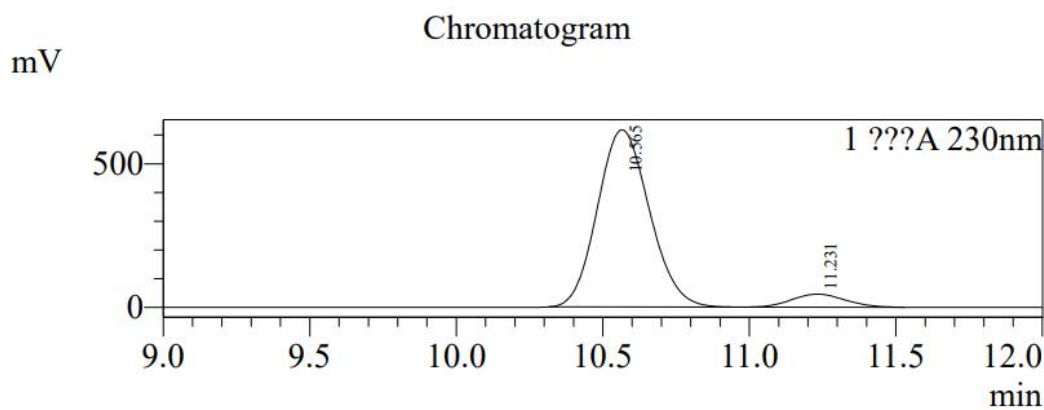

Peak Table

???A 230nm

| Peak# | Ret. Time | Area    | Height | Area%   |
|-------|-----------|---------|--------|---------|
| 1     | 10.565    | 7601215 | 617370 | 92.971  |
| 2     | 11.231    | 574657  | 45186  | 7.029   |
| Total |           | 8175872 | 662556 | 100.000 |

**4-ethyl-1-methyl (*S*)-2-(3,5-di-*tert*-butyl-4-hydroxyphenyl)-3-methylenesuccinate (3x).**

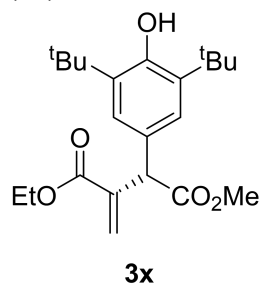

Compound **3x** (21.4 mg, 55% yield) was obtained as a white solid following the *general procedure III* from **1a** (0.1 mmol, 27.6 mg) and ethyl acrylate **2e** (0.15 mmol, 15 mg, 16  $\mu$ L) stirred for 6 hours.  $^1\text{H NMR}$  (400 MHz,  $\text{CDCl}_3$ )  $\delta$  (s, 2H), 6.38 (s, 1H), 5.35 (s, 1H), 5.20 (s, 1H), 4.72 (s, 1H), 4.28-4.19 (m, 2H), 3.71 (d,  $J = 1.2$  Hz, 3H), 1.42 (d,  $J = 1.2$  Hz, 18H), 1.30 (td,  $J = 7.2, 1.2$  Hz, 3H);  $^{13}\text{C NMR}$  (100 MHz,  $\text{CDCl}_3$ )  $\delta$  172.8, 166.5, 153.3, 139.8, 136.1, 127.8, 126.1, 125.6, 61.0, 53.0, 52.3, 34.3, 30.2, 14.1; **Mp**: 104-106  $^\circ\text{C}$ ; **HRMS** Calcd. for  $\text{C}_{22}\text{H}_{33}\text{O}_5^+$   $[\text{M}+\text{H}]^+$ : 377.2323, found: 377.2328.

$[\alpha]_{\text{D}}^{20} = -3.0$  (c 0.10,  $\text{CH}_2\text{Cl}_2$ ) for 86% ee; Enantiomeric excess was determined by HPLC with a Chiralcel AD-H column, Hexane/ $i$ PrOH = 95/5, 0.5 mL/min, 230nm,  $t_{\text{minor}} = 10.840$  min,  $t_{\text{major}} = 9.518$  min.

### Racemic Sample 3x

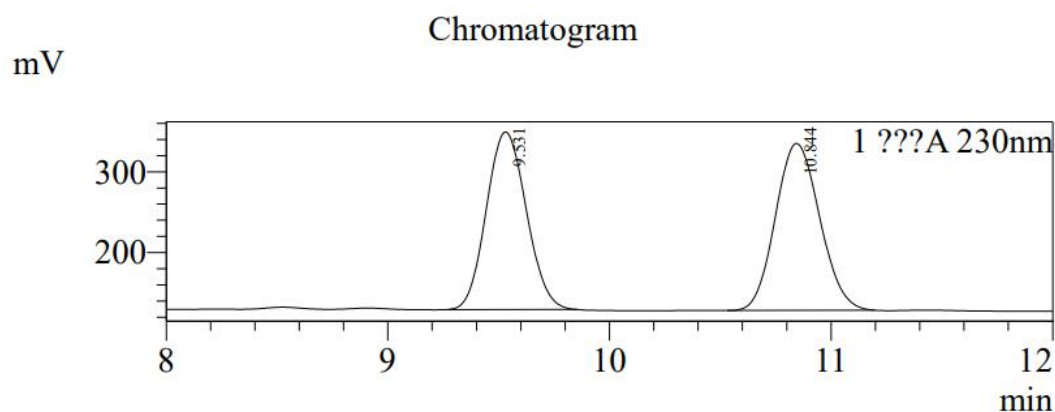

Peak Table

???A 230nm

| Peak# | Ret. Time | Area    | Height | Area%   |
|-------|-----------|---------|--------|---------|
| 1     | 9.531     | 2766647 | 220079 | 49.075  |
| 2     | 10.844    | 2870933 | 206730 | 50.925  |
| Total |           | 5637580 | 426809 | 100.000 |

### Enantiomeric Sample 3x

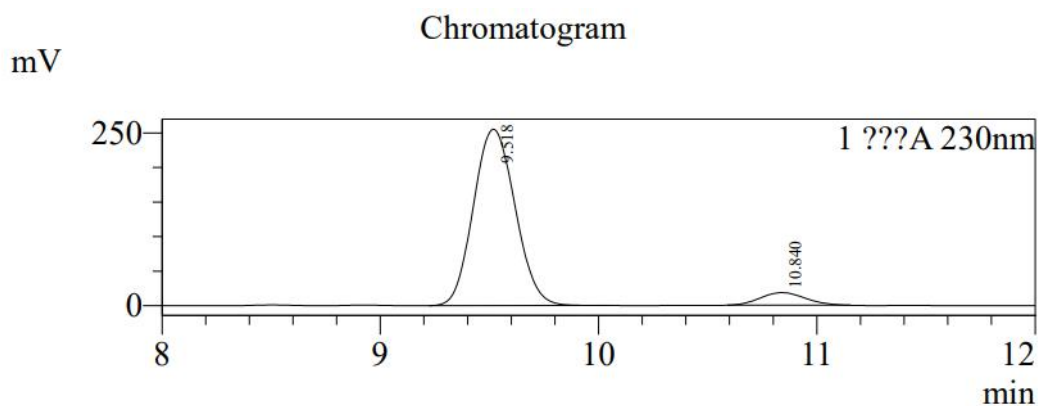

Peak Table

???A 230nm

| Peak# | Ret. Time | Area    | Height | Area%   |
|-------|-----------|---------|--------|---------|
| 1     | 9.518     | 3388542 | 255515 | 92.855  |
| 2     | 10.840    | 260748  | 18165  | 7.145   |
| Total |           | 3649290 | 273680 | 100.000 |

**(R)-2-(6-methoxynaphthalen-2-yl)propyl**

**(S)-2-(3,5-di-*tert*-butyl-4-hydroxyphenyl)-3-methylene-4-oxopentanoate (3y)**

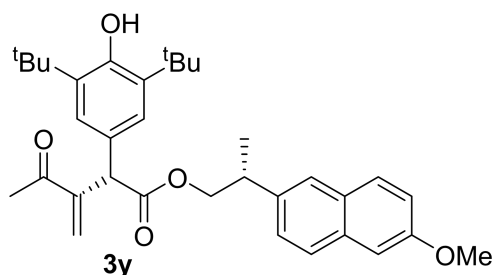

Compound **3y** (44.7 mg, 84% yield, >20:1 dr) was obtained as a white solid following the *general procedure III* from **1t** (0.1 mmol, 46 mg) and **2a** (0.15 mmol, 10.5 mg, 12.5  $\mu$ L) stirred for 6 hours.  $^1\text{H NMR}$  (400 MHz,  $\text{CDCl}_3$ )  $\delta$  7.67 (d,  $J = 2.0$  Hz, 1H), 7.65 (s, 1H), 7.56 (s, 1H), 7.29 (dd,  $J = 8.8, 2.0$  Hz, 1H), 7.14-7.09 (m, 2H), 7.00 (s, 2H), 6.17 (d,  $J = 1.2$  Hz, 1H), 5.58 (d,  $J = 1.6$  Hz, 1H), 5.19 (s, 1H), 4.77 (s, 1H), 4.32-4.18 (m, 2H), 3.91 (s, 3H), 3.21 (h,  $J = 6.8$  Hz, 1H), 2.31 (s, 3H), 1.41 (s, 18H), 1.31-1.29 (m, 3H);  $^{13}\text{C NMR}$  (100 MHz,  $\text{CDCl}_3$ )  $\delta$  198.9, 172.4, 157.3, 153.1, 147.9, 138.2, 136.0, 133.4, 129.1, 128.9, 128.1, 126.8, 126.5, 126.4, 125.6, 125.5, 118.7, 105.4, 69.9, 55.3, 52.0, 38.7, 34.3, 30.2, 25.8, 17.9; **Mp**: 126-128  $^\circ\text{C}$ . **HRMS** Calcd. for  $\text{C}_{34}\text{H}_{41}\text{O}_5$   $[\text{M}-\text{H}]^-$ : 529.2960, found: 529.2969;  $[\alpha]_D^{20} = -95.1$  (c 0.20,  $\text{CH}_2\text{Cl}_2$ ).

**(1R,2S,5R)-2-isopropyl-5-methylcyclohexyl**

**(S)-2-(3,5-di-tert-butyl-4-hydroxyphenyl)-3-methylene-4-oxopentanoate (3z)**

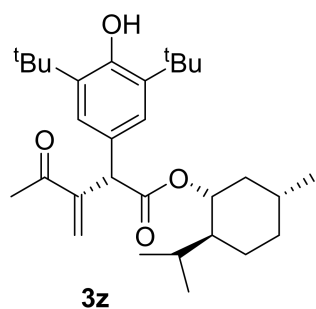

Compound **3z** (16 mg, 68% yield, >20:1 dr) was obtained as a white solid following the *general procedure III* from **1r** (0.05 mmol, 20 mg) and **2a** (0.075 mmol, 5.26 mg, 12.5  $\mu$ L) stirred for 6 hours.  $^1\text{H NMR}$  (400 MHz,  $\text{CDCl}_3$ )  $\delta$  6.98 (s, 2H), 6.21 (s, 1H), 5.62 (s, 1H), 5.15 (s, 1H), 4.67 (s, 1H), 4.61-4.55 (m, 1H), 2.39 (s, 3H), 2.06 (d,  $J$  = 12.0 Hz, 1H), 1.65-1.59 (m, 3H), 1.40 (s, 18H), 1.32-1.25 (m, 3H), 1.08-0.96 (m, 2H), 0.89 (d,  $J$  = 6.4 Hz, 3H), 0.66 (d,  $J$  = 6.8 Hz, 3H), 0.49 (d,  $J$  = 6.8 Hz, 3H);  $^{13}\text{C NMR}$  (100 MHz,  $\text{CDCl}_3$ )  $\delta$  199.1, 172.1, 153.1, 148.0, 136.0, 128.0, 126.6, 125.7, 74.6, 52.5, 46.9, 40.8, 34.3, 31.4, 30.3, 25.9, 23.5, 22.0, 20.4, 16.2; **Mp**: 100-102  $^\circ\text{C}$ ; **HRMS** Calcd. for  $\text{C}_{30}\text{H}_{45}\text{O}_4$   $[\text{M}-\text{H}]^-$ : 469.3323, found: 469.3330;  $[\alpha]^{20}_{\text{D}}$  = -126.4 (c 0.13,  $\text{CH}_2\text{Cl}_2$ ).

**(3R,8S,9S,10R,13R,14S,17R)-17-((S)-2,5-dimethylhexyl)-10,13-dimethyl-2,3,4,7,8,9,10,11,12,13,14,15,16,17-tetradecahydro-1H-cyclopenta[a]phenanthren-3-yl (S)-2-(3,5-di-tert-butyl-4-hydroxyphenyl)-3-methylene-4-oxopentanoate (3za)**

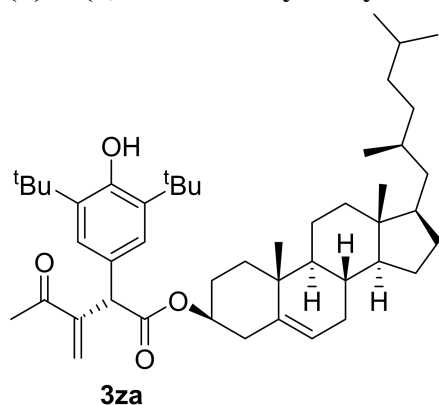

Compound **3za** (60.5 mg, 85% yield, >20:1 dr) was obtained as a white solid following the *general procedure III* from **1s** (0.1 mmol, 63.07 mg) and **2a** (0.15 mmol, 10.5 mg, 12.5  $\mu$ L) stirred for 6 hours.  $^1\text{H NMR}$  (400 MHz,  $\text{CDCl}_3$ )  $\delta$  6.98 (s, 2H), 6.18 (s, 1H), 5.52 (s, 1H), 5.36 (d,  $J$  = 4.4 Hz, 1H), 5.16 (s, 1H), 4.73 (s, 1H),

4.72-4.61 (m, 1H), 2.39 (s, 3H), 2.36-2.31 (m, 2H), 2.01-1.93 (m, 2H), 1.87-1.77 (m, 3H), 1.53-1.45 (m, 8H), 1.41 (s, 18H), 1.33-1.32 (m, 3H), 1.17-1.05 (m, 7H), 1.03-0.99 (m, 5H), 0.91 (d,  $J = 6.4$  Hz, 4H), 0.86 (d,  $J = 6.4$  Hz, 6H), 0.66 (s, 3H);  $^{13}\text{C}$  NMR (100 MHz,  $\text{CDCl}_3$ )  $\delta$  198.9, 171.7, 153.0, 148.5, 139.6, 136.0, 127.8, 126.8, 125.5, 122.6, 74.5, 56.6, 56.1, 52.2, 50.0, 42.3, 39.7, 39.5, 37.9, 36.9, 36.5, 36.1, 35.8, 34.3, 31.9, 30.3, 28.2, 28.0, 27.4, 25.9, 24.2, 23.8, 22.8, 22.5, 21.0, 19.3, 18.7, 11.8; **Mp**: 191-193 °C; **HRMS** Calcd. for  $\text{C}_{47}\text{H}_{71}\text{O}_4^-$   $[\text{M}-\text{H}]^-$ : 699.5358, found: 699.5367;  $[\alpha]_{\text{D}}^{20} = -68.3$  (c 0.17,  $\text{CH}_2\text{Cl}_2$ ).

**(S)-2-(3,5-di-*tert*-butyl-4-hydroxyphenyl)-3-formyl-*N*-methoxy-*N*-methylbut-3-enamide (3zb)**

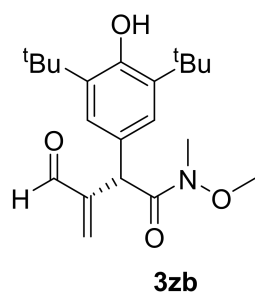

Compound **3zb** (15.4 mg, 85% yield) was obtained as a white solid following the *general procedure III* from **1q** (0.05 mmol, 15.3 mg) and acrolein **2d** (0.075 mmol, 4.2 mg, 5  $\mu\text{L}$ ) stirred for 8 hours.  $^1\text{H}$  NMR (500 MHz,  $\text{CDCl}_3$ )  $\delta$  9.60 (s, 1H), 7.06 (s, 2H), 6.21 (s, 1H), 6.15 (s, 1H), 5.16 (s, 1H), 3.58 (s, 3H), 3.19 (s, 3H), 1.41 (s, 18H);  $^{13}\text{C}$  NMR (125 MHz,  $\text{CDCl}_3$ )  $\delta$  193.6, 153.1, 149.4, 137.1, 136.1, 126.4, 125.6, 61.1, 46.0, 34.4, 30.3; **Mp**: 114-115 °C; **HRMS** Calcd. for  $\text{C}_{21}\text{H}_{30}\text{NO}_4^-$   $[\text{M}-\text{H}]^-$ : 360.2175, found: 360.2176.

$[\alpha]_{\text{D}}^{20} = -83.2$  (c 0.51,  $\text{CH}_2\text{Cl}_2$ ) for 88% ee; Enantiomeric excess was determined by HPLC with a Chiralcel AD-H column, Hexane/ $i$ PrOH = 95/5, 0.5 mL/min, 230 nm,  $t_{\text{minor}} = 16.304$  min,  $t_{\text{major}} = 14.738$  min.

**Racemic Sample 3zb**

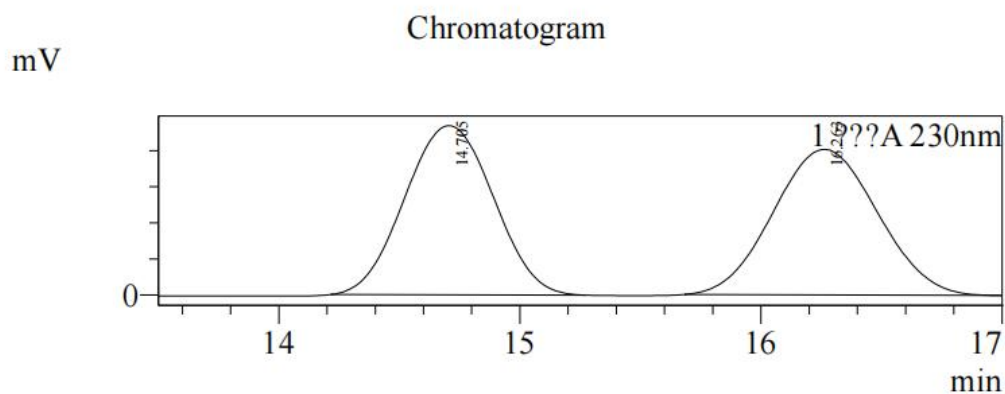

Peak Table

???A 230nm

| Peak# | Ret. Time | Area    | Height | Area%   |
|-------|-----------|---------|--------|---------|
| 1     | 14.705    | 2395275 | 93720  | 49.650  |
| 2     | 16.263    | 2429055 | 80638  | 50.350  |
| Total |           | 4824330 | 174359 | 100.000 |

**Enantiomeric Sample 3zb**

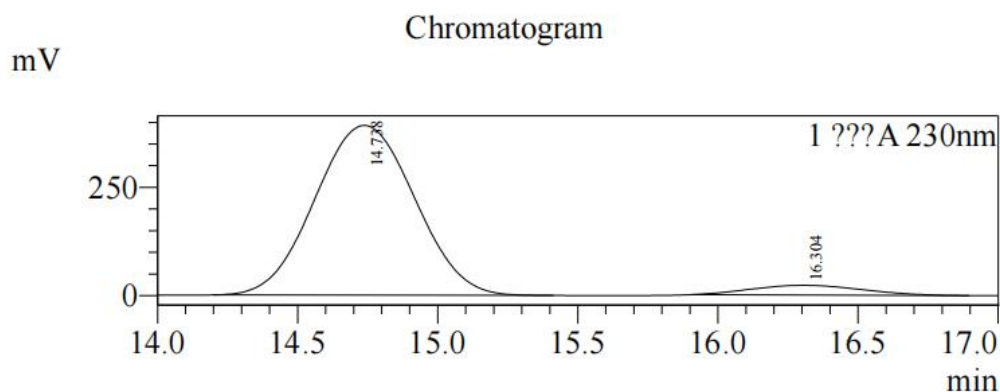

Peak Table

???A 230nm

| Peak# | Ret. Time | Area     | Height | Area%   |
|-------|-----------|----------|--------|---------|
| 1     | 14.738    | 9702234  | 391916 | 94.080  |
| 2     | 16.304    | 610558   | 22329  | 5.920   |
| Total |           | 10312792 | 414246 | 100.000 |

**Ethyl**

**(S)-3-(3,5-di-*tert*-butyl-4-hydroxyphenyl)-4-(methoxy(methyl)amino)-2-methylene-4-oxobutanoate (3zc)**



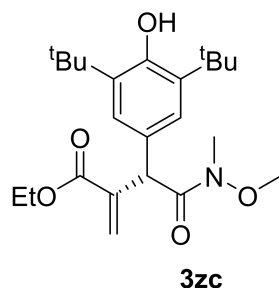

Compound **3zc** (10.0 mg, 24% yield) was obtained as a yellow viscous liquid following the *general procedure III* from **1q** (0.1 mmol, 30.6 mg) and ethyl acrylate **2e** (0.15 mmol, 15 mg, 16  $\mu$ L) stirred for 8 hours.  $^1\text{H NMR}$  (500 MHz,  $\text{CDCl}_3$ )  $\delta$  7.04 (s, 2H), 6.38 (s, 1H), 5.32 (s, 1H), 5.30 (s, 1H), 5.15 (s, 1H), 4.27-4.17 (m, 2H), 3.54 (s, 3H), 3.19 (s, 3H), 1.41 (s, 18H), 1.29 (t,  $J = 7.0$  Hz, 3H);  $^{13}\text{C NMR}$  (125 MHz,  $\text{CDCl}_3$ )  $\delta$  166.9, 153.0, 140.6, 136.0, 127.8, 126.7, 125.9, 61.0, 60.9, 49.5, 34.3, 30.4, 14.2; **HRMS** Calcd. for  $\text{C}_{23}\text{H}_{34}\text{NO}_5$   $[\text{M}-\text{H}]^-$ : 404.2437, found: 404.2433.

$[\alpha]_D^{20} = -37.6$  (c 0.19,  $\text{CH}_2\text{Cl}_2$ ) for 77% ee; Enantiomeric excess was determined by HPLC with a Chiralcel AD-H column, Hexane/ $i$ PrOH = 95/5, 0.5 mL/min, 230 nm,  $t_{\text{minor}} = 11.380$  min,  $t_{\text{major}} = 13.036$  min.

### Racemic Sample 3zc

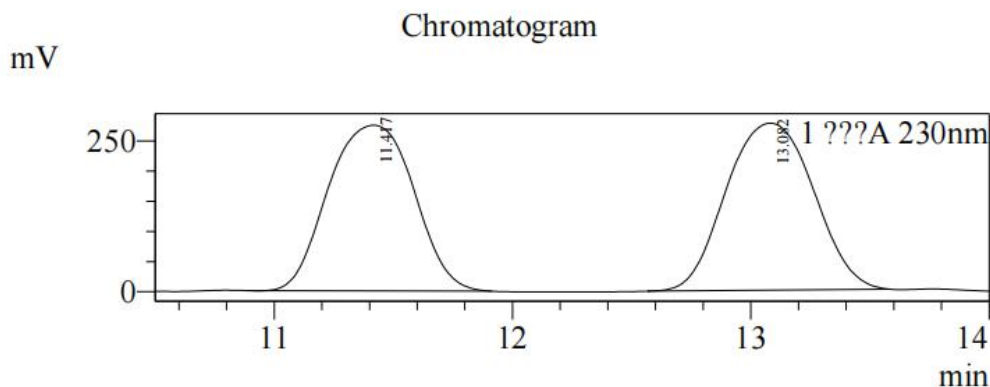

Peak Table

| ???A 230nm |           |          |        |         |
|------------|-----------|----------|--------|---------|
| Peak#      | Ret. Time | Area     | Height | Area%   |
| 1          | 11.417    | 6874910  | 274700 | 49.253  |
| 2          | 13.082    | 7083433  | 276882 | 50.747  |
| Total      |           | 13958343 | 551582 | 100.000 |

### Enantiomeric Sample 3zc

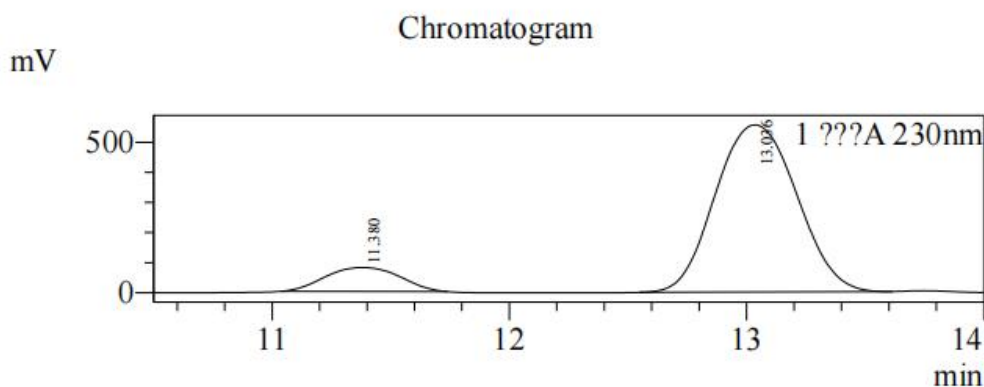

???A 230nm

| Peak# | Ret. Time | Area     | Height | Area%   |
|-------|-----------|----------|--------|---------|
| 1     | 11.380    | 1722414  | 79109  | 11.511  |
| 2     | 13.036    | 13241104 | 555059 | 88.489  |
| Total |           | 14963518 | 634168 | 100.000 |

**Methyl (S)-2-(3,5-di-*tert*-butyl-4-hydroxyphenyl)-3-methylene-4-oxoheptanoate (3zd)**

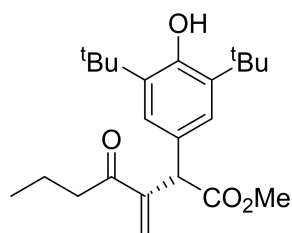

**3zd**

Compound **3zd** (28.9 mg, 77% yield) was obtained as a colorless viscous liquid following the *general procedure III* from **1a** (0.1 mmol, 27.6 mg) and hex-1-en-3-one **2f** (0.15 mmol, 14.7 mg, 19  $\mu$ L) stirred for 8 hours.  $^1\text{H NMR}$  (500 MHz,  $\text{CDCl}_3$ )  $\delta$  6.99 (s, 2H), 6.20 (s, 1H), 5.52 (d,  $J = 2.0$  Hz, 1H), 5.18 (s, 1H), 4.78 (s, 1H), 3.68 (s, 3H), 2.77-2.66 (m, 2H), 1.70-1.63 (m, 2H), 1.41 (s, 18H), 0.93 (t,  $J = 7.0$  Hz, 3H);  $^{13}\text{C NMR}$  (125 MHz,  $\text{CDCl}_3$ )  $\delta$  201.2, 173.0, 153.2, 148.0, 136.1, 126.9, 126.5, 125.6, 52.2, 52.0, 39.6, 34.3, 30.3, 17.8, 13.7; **HRMS** Calcd. for  $\text{C}_{23}\text{H}_{33}\text{O}_4$   $[\text{M}-\text{H}]^-$ : 373.2379, found: 373.2380.

$[\alpha]_D^{20} = -91.0$  (c 0.58,  $\text{CH}_2\text{Cl}_2$ ) for 93% ee; Enantiomeric excess was determined by HPLC with a Chiralcel AD-H column, Hexane/*i*PrOH = 95/5, 0.5 mL/min, 230 nm,

$t_{minor} = 12.015 \text{ min}$ ,  $t_{major} = 9.273 \text{ min}$ .

### Racemic Sample 3zd

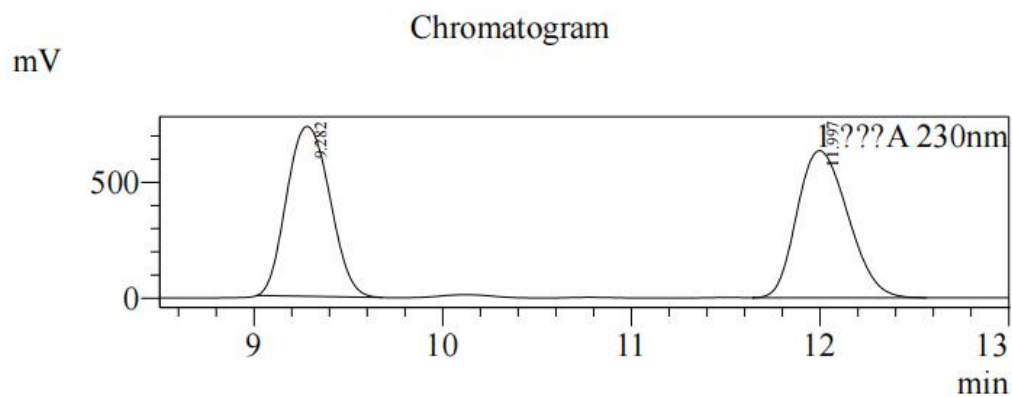

Peak Table

???A 230nm

| Peak# | Ret. Time | Area     | Height  | Area%   |
|-------|-----------|----------|---------|---------|
| 1     | 9.282     | 11678746 | 732848  | 49.563  |
| 2     | 11.997    | 11884774 | 633609  | 50.437  |
| Total |           | 23563519 | 1366457 | 100.000 |

### Enantiomeric Sample 3zd

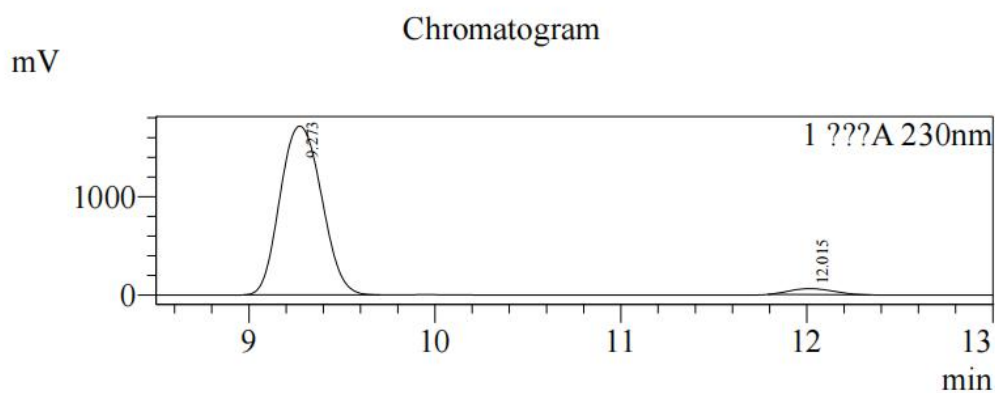

Peak Table

???A 230nm

| Peak# | Ret. Time | Area     | Height  | Area%   |
|-------|-----------|----------|---------|---------|
| 1     | 9.273     | 26668420 | 1713806 | 96.454  |
| 2     | 12.015    | 980415   | 60057   | 3.546   |
| Total |           | 27648835 | 1773863 | 100.000 |

**Methyl (*R*)-2-(3,5-di-*tert*-butyl-4-hydroxyphenyl)-3-methylene-4-oxopentanoate (3a')**

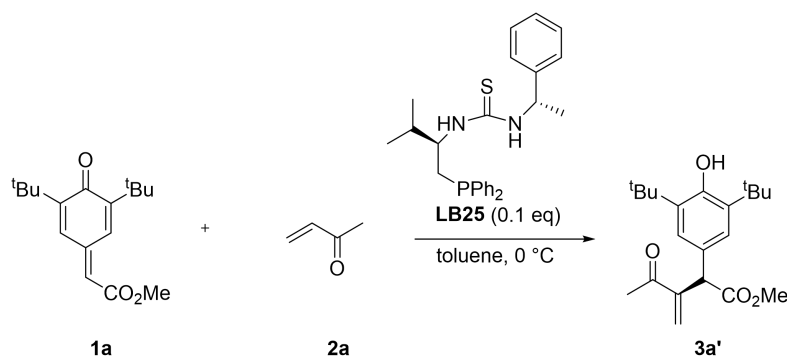

A stirred solution of **1a** (0.05 mmol), **LB25** (0.075 mmol) in 1 mL of toluene was cooled to 0 °C. Subsequently, methyl vinyl ketone **2a** (0.075 mmol) was added through a syringe. The mixture was stirred at this temperature for 6 hours. After completion of the reaction, the reaction mixture was directly purified by silica gel chromatography using petroleum ether/EtOAc as the eluent to afford the desired products.

Compound **3a'** (17.2 mg, 99% yield) was obtained as a white solid following the *general procedure IIIa* from **1a** (0.05 mmol, 13.8 mg) and **2b** (0.075 mmol, 5.3 mg, 7  $\mu\text{L}$ ) stirred for 6 hours.  $^1\text{H NMR}$  (400 MHz,  $\text{CDCl}_3$ )  $\delta$  6.99 (s, 2H), 6.22 (d,  $J = 1.2$  Hz, 1H), 5.57 (d,  $J = 1.6$  Hz, 1H), 5.20 (s, 1H), 4.77 (s, 1H), 3.69 (s, 3H), 2.40 (s, 3H), 1.41 (s, 18H);  $^{13}\text{C NMR}$  (100 MHz,  $\text{CDCl}_3$ )  $\delta$  199.0, 173.0, 153.2, 148.1, 136.1, 128.4, 126.4, 125.5, 52.3, 51.7, 34.3, 30.2, 25.9; **Mp**: 79-81 °C; **HRMS** Calcd. for  $\text{C}_{21}\text{H}_{29}\text{O}_4^-$  [M-H] $^-$ : 345.2066, found: 345.2078.

$[\alpha]_D^{20} = +98.5$  (c 0.33,  $\text{CH}_2\text{Cl}_2$ ) for -95% ee; Enantiomeric excess was determined by HPLC with a Chiralcel AD-H column, Hexane/ $i$ PrOH = 95/5, 0.5 mL/min, 230nm,  $t_{\text{minor}} = 10.233$  min,  $t_{\text{major}} = 12.937$  min.

### **Racemic Sample 3a'**

### Chromatogram

mV

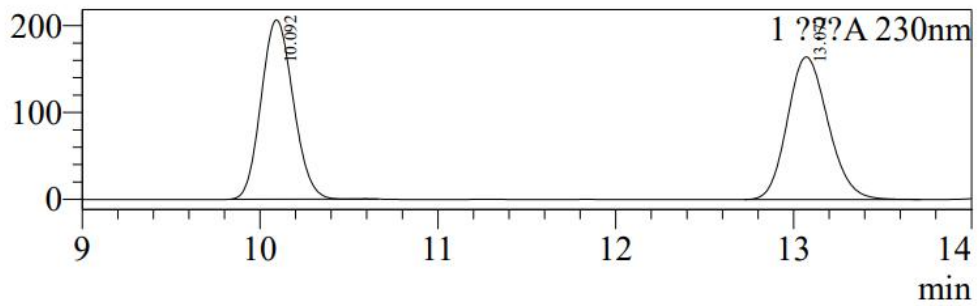

### Peak Table

???A 230nm

| Peak# | Ret. Time | Area    | Height | Area%   |
|-------|-----------|---------|--------|---------|
| 1     | 10.092    | 2589020 | 206559 | 49.763  |
| 2     | 13.071    | 2613693 | 164067 | 50.237  |
| Total |           | 5202713 | 370626 | 100.000 |

### Enantiomeric Sample 3a'

### Chromatogram

mV

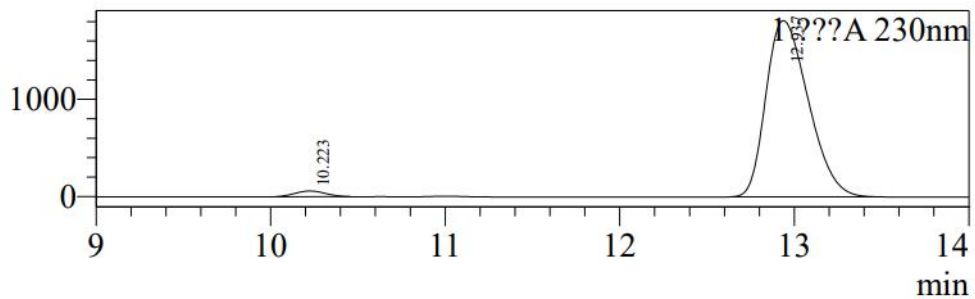

### Peak Table

???A 230nm

| Peak# | Ret. Time | Area     | Height  | Area%   |
|-------|-----------|----------|---------|---------|
| 1     | 10.223    | 708129   | 58332   | 2.263   |
| 2     | 12.937    | 30584592 | 1814626 | 97.737  |
| Total |           | 31292721 | 1872958 | 100.000 |

### 3. Synthetic applications

#### a) Scale-up experiment for the synthesis of **3a**

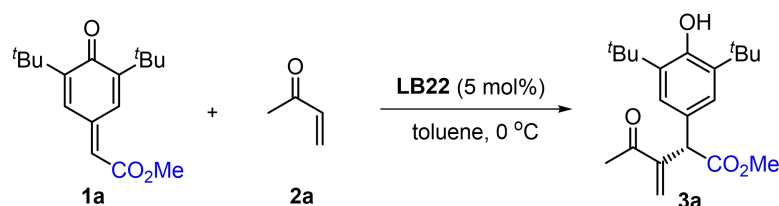

The scale up experiment was followed the general procedure *III*. To a solution of compound **1a** (2.0 mmol, 1.0 eq.) and chiral phosphine **LB22** (0.1 mmol, 0.05 eq.) in toluene (10 mL) was added vinyl ketone **2** (3.0 mmol, 1.5 eq.) under nitrogen atmosphere at 0 °C. TLC monitor until the compound **1a** consumed after 6 hours. The reaction mixture was then concentrated on a rotary evaporator under reduce pressure and the residue was subjected to purification by column chromatography (silica gel, PE/EtOAc: 20/1 to 10/1,  $R_f = 0.5-0.6$ ) to afford the corresponding product **3a** (0.57 g, 83% yield, 92% ee) as a white solid.

#### b) de-tert-butylation

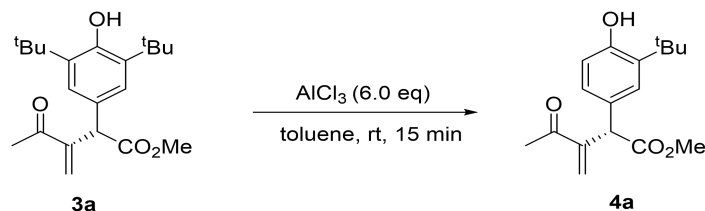

**Procedure (IV):** To a solution of **3a** (1.0 equiv.) in dry toluene was added  $\text{AlCl}_3$  (6.0 equiv.) under nitrogen. The reaction mixture was stirred at ambient temperature for 15 min. The mixture was then quenched with water and extracted twice with EtOAc, the organic layers were combined and dried over  $\text{Na}_2\text{SO}_4$ . The residue obtained was purified by column chromatography (petroleum ether/EtOAc) to afford the product **4a** in 88% yield with 92% ee.

#### Methyl (*S*)-2-(3-(*tert*-butyl)-4-hydroxyphenyl)-3-methylene-4-oxopentanoate (**4a**).

Compound **4** (25.6 mg, 88% yield) was obtained as colorless viscous liquid following the *procedure IV* from **3a** (0.1 mmol, 34.6 mg) and  $\text{AlCl}_3$  (0.6 mmol, 80 mg) stirred for 15 min.  $^1\text{H NMR}$  (400 MHz,  $\text{CDCl}_3$ )  $\delta$  7.07 (d,  $J = 2.0$  Hz, 1H), 6.91 (dd,  $J = 8.0$ ,

2.0 Hz, 1H), 6.64 (d,  $J = 8.0$  Hz, 1H), 6.24 (d,  $J = 0.8$  Hz, 1H), 5.59 (d,  $J = 1.6$  Hz, 1H), 4.78 (s, 1H), 3.69 (s, 3H), 2.40 (s, 3H), 1.38 (s, 9H);  $^{13}\text{C}$  NMR (100 MHz,  $\text{CDCl}_3$ )  $\delta$  199.2, 173.1, 153.9, 147.9, 136.6, 128.6, 128.0, 127.4, 127.1, 116.8, 52.4, 51.4, 34.6, 29.4, 25.8; HRMS Calcd. for  $\text{C}_{17}\text{H}_{21}\text{O}_4^-$  [M-H]: 289.1445, found: 289.1450.

$[\alpha]_D^{20} = -104.9$  (c 0.25,  $\text{CH}_2\text{Cl}_2$ ) for 92% ee; Enantiomeric excess was determined by HPLC with a Chiralcel AD-H column, Hexane/ $i$ PrOH = 90/10, 0.5 mL/min, 230nm,  $t_{\text{minor}} = 25.104$  min,  $t_{\text{major}} = 27.982$  min.

### Racemic Sample 4a

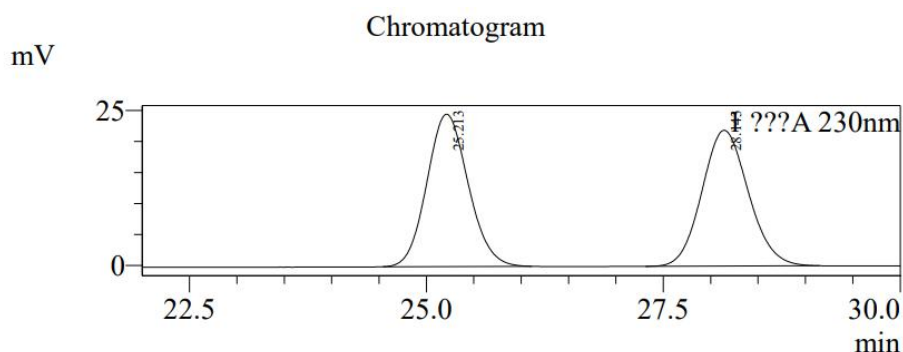

Peak Table

???A 230nm

| Peak# | Ret. Time | Area    | Height | Area%   |
|-------|-----------|---------|--------|---------|
| 1     | 25.213    | 744923  | 24566  | 49.944  |
| 2     | 28.143    | 746596  | 21898  | 50.056  |
| Total |           | 1491519 | 46464  | 100.000 |

### Enantiomeric Sample 4a

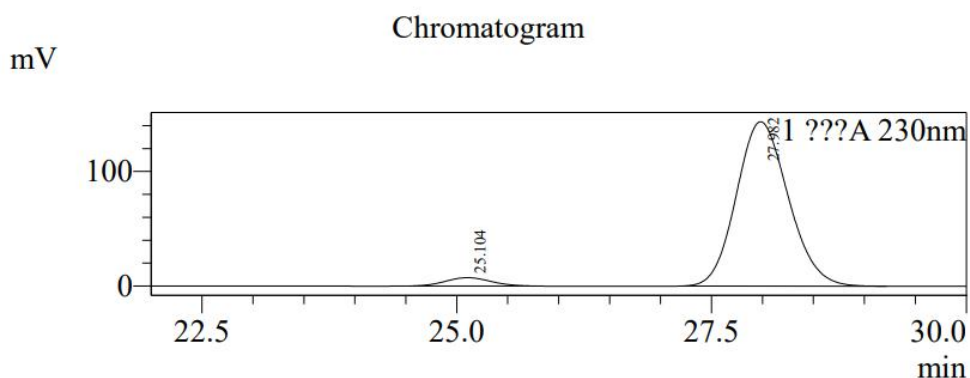

Peak Table

???A 230nm

| Peak# | Ret. Time | Area    | Height | Area%   |
|-------|-----------|---------|--------|---------|
| 1     | 25.104    | 224331  | 7307   | 4.227   |
| 2     | 27.982    | 5083146 | 143465 | 95.773  |
| Total |           | 5307477 | 150772 | 100.000 |

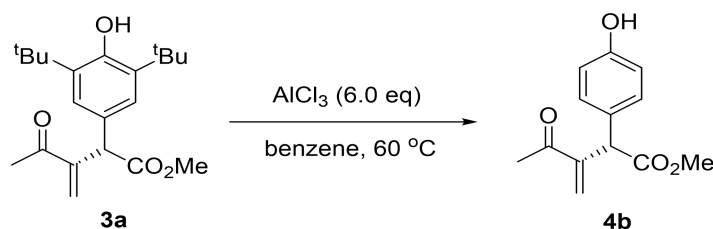

To a solution of **3a** (0.1 mmol, 34.6 mg) in benzene was added AlCl<sub>3</sub> (6.0 equiv.) under nitrogen. The reaction mixture was stirred at 60 °C for 3 h. The mixture was then quenched with water and extracted twice with EtOAc, the organic layers were combined and dried over Na<sub>2</sub>SO<sub>4</sub>. The residue obtained was purified by column chromatography (petroleum ether/EtOAc) to afford the product **4b** in 41% yield with 92% ee.

#### **Methyl (S)-2-(4-hydroxyphenyl)-3-methylene-4-oxopentanoate (4b)**

Compound **4b** (9.7 mg, 41% yield) was obtained as white solid following the *procedure IV* from **3a** (0.1 mmol, 34.6 mg) and AlCl<sub>3</sub> (0.6 mmol, 80 mg) stirred for 3 h. <sup>1</sup>H NMR (500 MHz, CDCl<sub>3</sub>) δ 7.09 (d, *J* = 8.5 Hz, 2H), 6.80 (d, *J* = 8.5 Hz, 2H), 6.23 (s, 1H), 5.62 (d, *J* = 1.5 Hz, 1H), 4.79 (s, 1H), 3.68 (s, 3H), 2.39 (s, 3H); <sup>13</sup>C NMR (125 MHz, CDCl<sub>3</sub>) δ 199.0, 172.9, 155.3, 147.7, 130.3, 128.2, 128.0, 115.8, 52.4, 51.1, 25.8; **Mp**: 123-125 °C; **HRMS** Calcd. for C<sub>13</sub>H<sub>13</sub>O<sub>4</sub>[M-H]<sup>-</sup>: 233.0814, found: 233.0820.

[α]<sub>D</sub><sup>20</sup> = -94.9 (c 0.32, CH<sub>2</sub>Cl<sub>2</sub>) for 92% ee; Enantiomeric excess was determined by HPLC with a Chiralcel OD-H column, Hexane/*i*PrOH = 90/10, 0.5 mL/min, 230 nm, *t*<sub>minor</sub> = 30.734 min, *t*<sub>major</sub> = 32.878 min.

#### **Racemic Sample 4b**



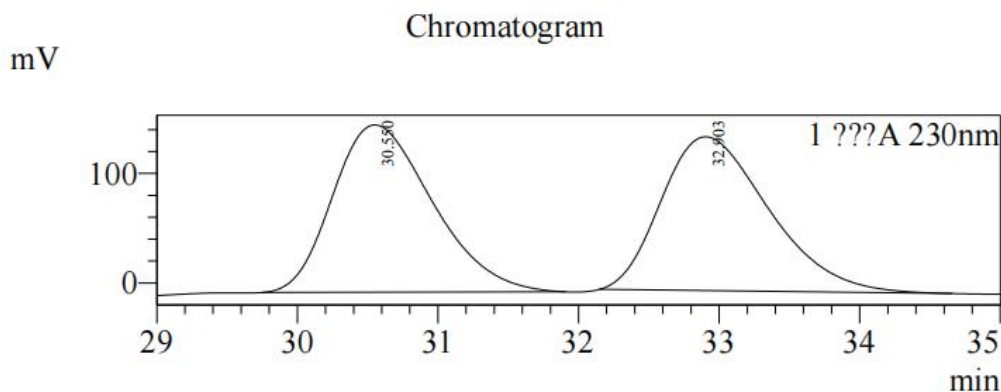

Peak Table

???A 230nm

| Peak# | Ret. Time | Area     | Height | Area%   |
|-------|-----------|----------|--------|---------|
| 1     | 30.550    | 7515348  | 152775 | 50.209  |
| 2     | 32.903    | 7452852  | 140378 | 49.791  |
| Total |           | 14968201 | 293153 | 100.000 |

### Enantiomeric Sample 4b

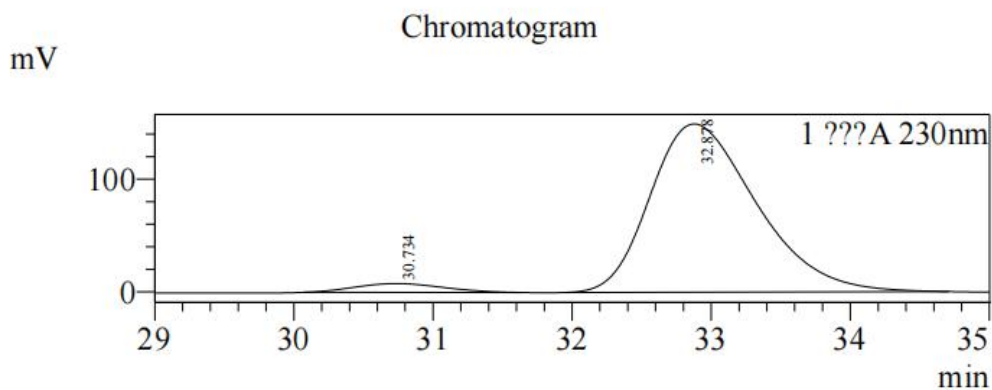

Peak Table

???A 230nm

| Peak# | Ret. Time | Area    | Height | Area%   |
|-------|-----------|---------|--------|---------|
| 1     | 30.734    | 344859  | 7834   | 4.174   |
| 2     | 32.878    | 7917386 | 149297 | 95.826  |
| Total |           | 8262244 | 157131 | 100.000 |

### c) Synthesis of compound 5

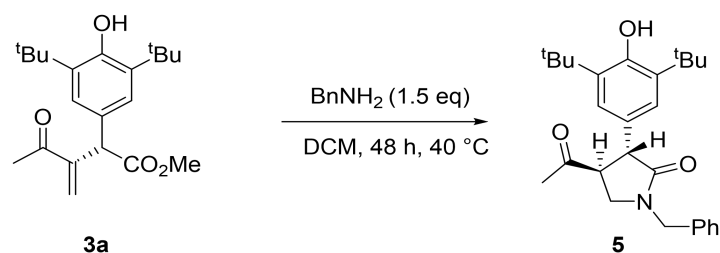

**Procedure (V):** Add BnNH<sub>2</sub> to a solution of **3a** in anhydrous DCM with a reflux

reactor, then the mixture was heated to 40 °C for 24 hours. After conversion, the mixture was purified by column chromatography (petroleum ether/EtOAc = 5/1) to afford the product **5** in 44% yield with 92% ee.

**(3*S*,4*R*)-4-acetyl-1-benzyl-3-(3,5-di-*tert*-butyl-4-hydroxyphenyl)pyrrolidin-2-one**  
**(5)**

Compound **5** (93.1 mg, 44% yield) was obtained as a white solid following the *procedure V* from **3a** (0.5 mmol, 173 mg) and BnNH<sub>2</sub> (0.75mmol, 80.4 mg, 80 μL) stirred at 40 °C for 24 hours. <sup>1</sup>H NMR (400 MHz, CDCl<sub>3</sub>) δ 7.37-7.29 (m, 5H), 7.00 (s, 2H), 5.22 (s, 1H), 4.81 (d, *J* = 14.4 Hz, 1H), 4.30 (d, *J* = 14.4 Hz, 1H), 3.83 (d, *J* = 7.6 Hz, 1H), 3.49 (dd, *J* = 7.6, 1.2 Hz, 2H), 3.33 (q, *J* = 7.6 Hz, 1H), 2.11 (s, 3H), 1.43 (s, 18H); <sup>13</sup>C NMR (100 MHz, CDCl<sub>3</sub>) δ 205.8, 173.1, 153.1, 136.2, 136.1, 129.6, 128.7, 128.1, 127.7, 124.5, 53.4, 50.8, 46.8, 45.7, 34.3, 30.1, 29.3; **Mp**: 146-148 °C; **HRMS** Calcd. for C<sub>27</sub>H<sub>34</sub>NO<sub>3</sub><sup>-</sup> [M-H]<sup>-</sup>: 420.2544, found: 420.2553.

[α]<sub>D</sub><sup>20</sup> = -112.7 (c 0.16, CH<sub>2</sub>Cl<sub>2</sub>) for 91% ee; Enantiomeric excess was determined by HPLC with a Chiralcel AD-H column, Hexane/<sup>i</sup>PrOH = 90/10, 0.5 mL/min, 230nm, *t*<sub>minor</sub> = 26.588 min, *t*<sub>major</sub> = 36.085 min.

**Racemic Sample 5**

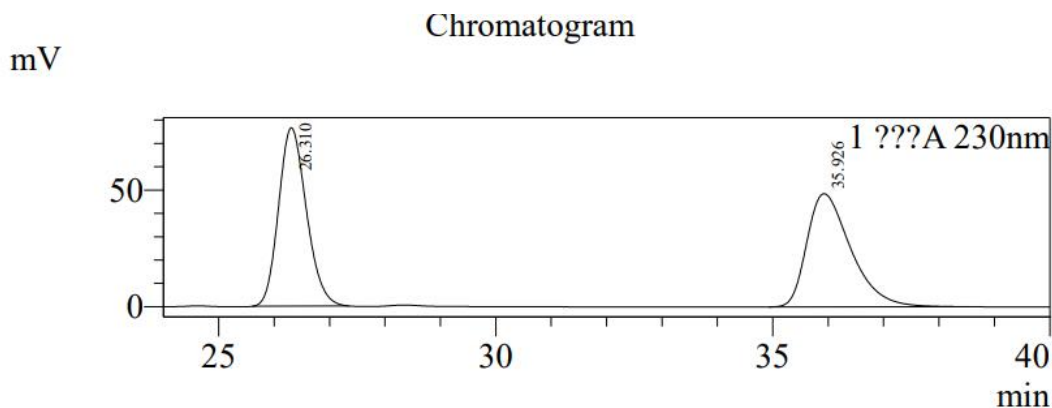

Peak Table

???A 230nm

| Peak# | Ret. Time | Area    | Height | Area%   |
|-------|-----------|---------|--------|---------|
| 1     | 26.310    | 2674822 | 76516  | 50.001  |
| 2     | 35.926    | 2674686 | 48554  | 49.999  |
| Total |           | 5349509 | 125070 | 100.000 |

**Enantiomeric Sample 5**

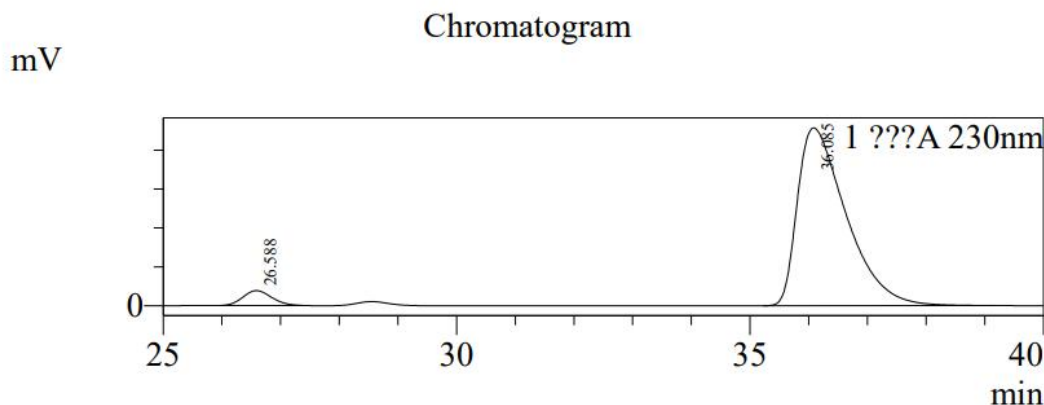

Peak Table

???A 230nm

| Peak# | Ret. Time | Area     | Height | Area%   |
|-------|-----------|----------|--------|---------|
| 1     | 26.588    | 646553   | 19107  | 4.675   |
| 2     | 36.085    | 13183006 | 228520 | 95.325  |
| Total |           | 13829559 | 247627 | 100.000 |

#### d) Preparation of compound 6

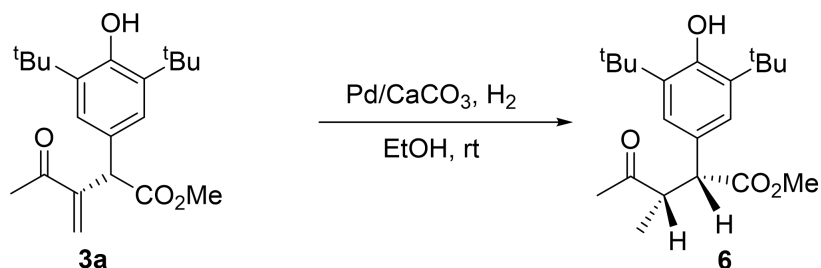

**Procedure (VI):** Compound **3a** was dissolved in ethanol, and then 5% Pd/CaCO<sub>3</sub> was added. The mixture was stirred overnight under a hydrogen balloon at room temperature. Then the mixture was filtered through a Celite pad and the solvent removed in vacuum, the residue obtained was purified by column chromatography (petroleum ether/EtOAc) to afford the product **6** in 80% yield with 91% ee.

#### Methyl (2*S*,3*R*)-2-(3,5-di-*tert*-butyl-4-hydroxyphenyl)-3-methyl-4-oxopentanoate (**6**).

Compound **6** (27.7 mg, 80% yield) was obtained as colorless viscous liquid following the *procedure VI* from **3a** (0.1 mmol, 34.6 mg) and 5% Pd/CaCO<sub>3</sub> (0.05 mmol, 5.5 mg) stirred overnight. <sup>1</sup>H NMR (400 MHz, CDCl<sub>3</sub>) δ 7.07 (s, 2H), 5.16 (s, 1H), 3.69 (d, *J* = 10.8 Hz, 1H), 3.67 (s, 3H), 3.33 (dq, *J* = 10.8, 6.8 Hz, 1H), 1.81 (s, 3H), 1.40 (s, 18H), 1.16 (d, *J* = 6.8 Hz, 3H); <sup>13</sup>C NMR (100 MHz, CDCl<sub>3</sub>) δ 210.8, 173.3, 153.1,

135.9, 127.2, 124.7, 54.1, 51.9, 50.0, 34.3, 30.19, 30.16, 15.6; **HRMS** Calcd. for  $C_{21}H_{31}O_4 [M-H]^-$ : 347.2228, found: 347.2233.

$[\alpha]_D^{20} = -69.2$  (c 0.42,  $CH_2Cl_2$ ) for 91% ee; Enantiomeric excess was determined by HPLC with a Chiralcel AD-H column, Hexane/PrOH = 95/5, 0.5 mL/min, 230nm,  $t_{minor} = 9.833$  min,  $t_{major} = 8.736$  min.

### Racemic Sample 6

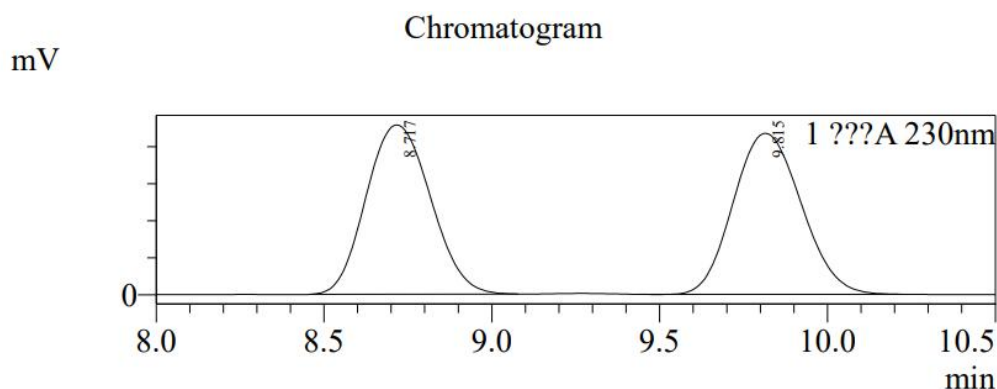

Peak Table

???A 230nm

| Peak# | Ret. Time | Area     | Height | Area%   |
|-------|-----------|----------|--------|---------|
| 1     | 8.717     | 6111826  | 457673 | 49.929  |
| 2     | 9.815     | 6129184  | 435426 | 50.071  |
| Total |           | 12241009 | 893099 | 100.000 |

### Enantiomeric Sample 6

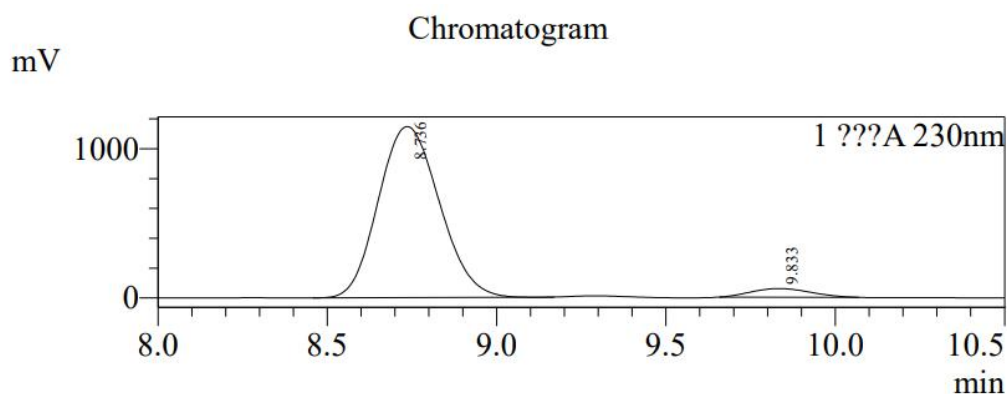

Peak Table

???A 230nm

| Peak# | Ret. Time | Area     | Height  | Area%   |
|-------|-----------|----------|---------|---------|
| 1     | 8.736     | 14358530 | 1146532 | 95.332  |
| 2     | 9.833     | 703133   | 57673   | 4.668   |
| Total |           | 15061663 | 1204205 | 100.000 |

### d) Preparation of 7 and 7'

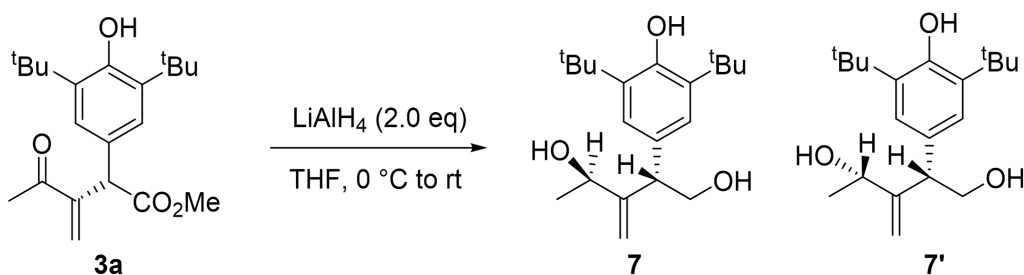

**Procedure (VII):** A solution of  $\text{LiAlH}_4$  in anhydrous THF was cooled to 0 °C under nitrogen atmosphere, the solution of **3a** in anhydrous THF was added dropwise while maintaining temperature at 0°C, then the mixture was warmed to room temperature for full conversion. The mixture was then quenched with water and extracted twice with EtOAc, the organic layers were combined and dried over anhydrous  $\text{Na}_2\text{SO}_4$ . The residue obtained was purified by column chromatography (petroleum ether/EtOAc) to afford the product **7** in 27% yield with 90% ee and the product **7'** in 53% yield with 99% ee.

**(2S,4R)-2-(3,5-di-*tert*-butyl-4-hydroxyphenyl)-3-methylenepentane-1,4-diol (7)**

Compound **7** (17.0 mg, 27% yield) was obtained as colorless viscous liquid following the *procedure VII* from **3a** (0.2 mmol, 69.2 mg) and  $\text{LiAlH}_4$  (0.4 mmol, 15.2 mg) stirred until full conversion.  $^1\text{H NMR}$  (400 MHz,  $\text{CDCl}_3$ )  $\delta$  7.02 (s, 2H), 5.38 (s, 1H), 5.13 (s, 1H), 5.08 (s, 1H), 4.20 (q,  $J = 6.4$  Hz, 1H), 3.97 (dd,  $J = 10.8, 8.0$  Hz, 1H), 3.85 (dd,  $J = 10.8, 6.4$  Hz, 1H), 3.52 (t,  $J = 7.2$  Hz, 1H), 1.91 (brs, 2H), 1.42 (s, 18H), 1.26 (d,  $J = 6.4$  Hz, 3H);  $^{13}\text{C NMR}$  (100 MHz,  $\text{CDCl}_3$ )  $\delta$  153.8, 152.7, 136.0, 130.4, 124.5, 109.6, 70.2, 66.1, 49.8, 34.4, 30.3, 22.5; **HRMS** Calcd. for  $\text{C}_{20}\text{H}_{31}\text{O}_3$   $[\text{M}-\text{H}]^-$ : 319.2273, found: 319.2284.

$[\alpha]_D^{20} = +34.6$  (c 0.24,  $\text{CH}_2\text{Cl}_2$ ) for 90% ee; Enantiomeric excess was determined by HPLC with a Chiralcel AD-H column, Hexane/*i*PrOH = 95/5, 0.5 mL/min, 230 nm,  $t_{\text{minor}} = 40.092$  min,  $t_{\text{major}} = 30.504$  min.

**Racemic Sample 7**

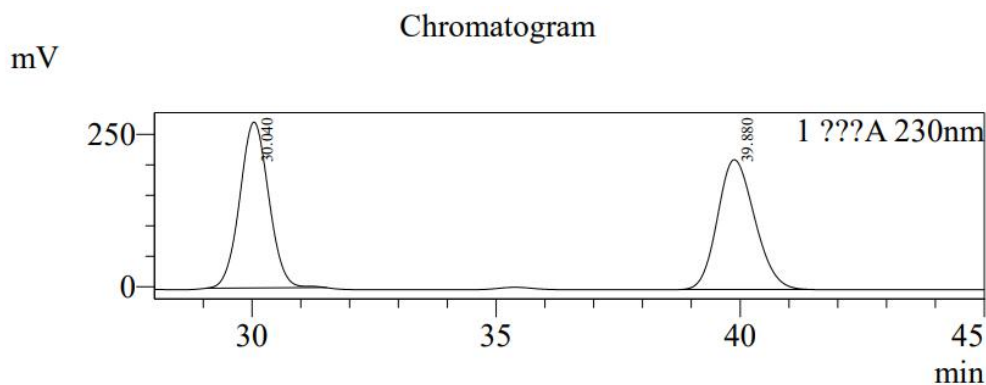

Peak Table

???A 230nm

| Peak# | Ret. Time | Area     | Height | Area%   |
|-------|-----------|----------|--------|---------|
| 1     | 30.040    | 11288094 | 272142 | 49.988  |
| 2     | 39.880    | 11293366 | 212889 | 50.012  |
| Total |           | 22581460 | 485031 | 100.000 |

### Enantiomeric Sample 7

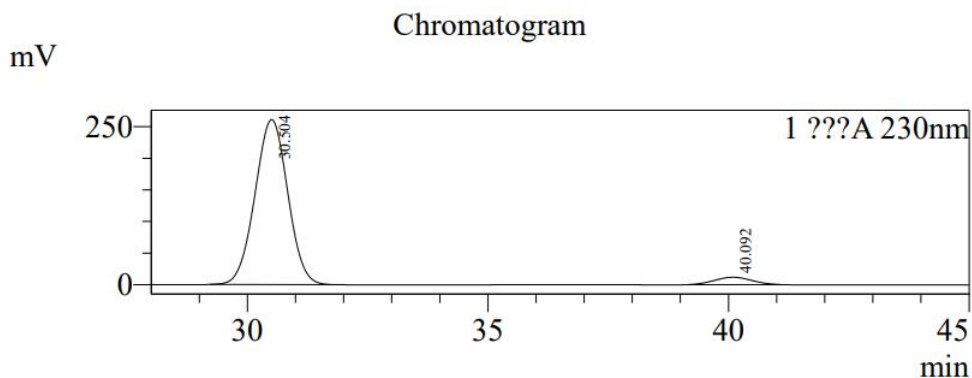

Peak Table

???A 230nm

| Peak# | Ret. Time | Area     | Height | Area%   |
|-------|-----------|----------|--------|---------|
| 1     | 30.504    | 12383138 | 261003 | 95.177  |
| 2     | 40.092    | 627528   | 11655  | 4.823   |
| Total |           | 13010666 | 272658 | 100.000 |

### **(2*S*,4*S*)-2-(3,5-di-*tert*-butyl-4-hydroxyphenyl)-3-methylenepentane-1,4-diol (7')**

Compound **7'** (33.9 mg, 53% yield) was obtained as white solid following the *procedure VII* from **3a** (0.2 mmol, 69.2 mg) and LiAlH<sub>4</sub> (0.4 mmol, 15.2 mg) stirred until full conversion. <sup>1</sup>H NMR (400 MHz, CDCl<sub>3</sub>) δ 7.04 (s, 2H), 5.36 (s, 1H), 5.09 (s, 1H), 4.18 (q, *J* = 6.4 Hz, 1H), 3.90 (dd, *J* = 10.8, 8.0 Hz, 1H), 3.82 (dd, *J* = 10.8, 6.8 Hz, 1H), 3.61 (t, *J* = 7.2 Hz, 1H), 2.19 (brs, 2H), 1.42 (s, 18H), 1.23 (d, *J* = 6.4 Hz, 3H); <sup>13</sup>C NMR (100 MHz, CDCl<sub>3</sub>) δ 152.9, 152.7, 135.9, 130.3, 124.7, 109.8, 70.6, 66.1, 50.2, 34.4, 30.2, 22.2; **Mp**: 102-104 °C; **HRMS** Calcd. for C<sub>20</sub>H<sub>31</sub>O<sub>3</sub> [M-H]<sup>-</sup>:

319.2273, found: 319.2284.

$[\alpha]_D^{20} = +65.9$  (c 0.14,  $\text{CH}_2\text{Cl}_2$ ) for 99% ee; Enantiomeric excess was determined by HPLC with a Chiralcel OD-H column, Hexane/ $\text{PrOH} = 95/5$ , 0.5 mL/min, 230 nm,  $t_{\text{major}} = 15.921$  min.

### Racemic Sample 7'

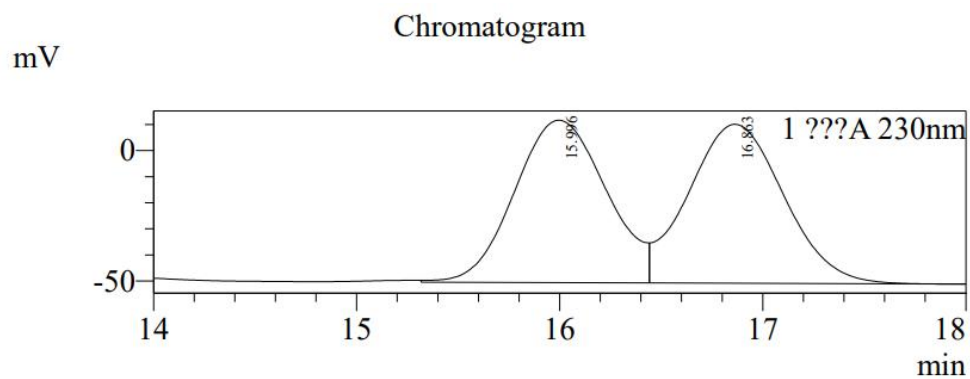

Peak Table

??A 230nm

| Peak# | Ret. Time | Area    | Height | Area%   |
|-------|-----------|---------|--------|---------|
| 1     | 15.996    | 1956656 | 62294  | 49.557  |
| 2     | 16.863    | 1991620 | 60979  | 50.443  |
| Total |           | 3948276 | 123274 | 100.000 |

### Enantiomeric Sample 7'

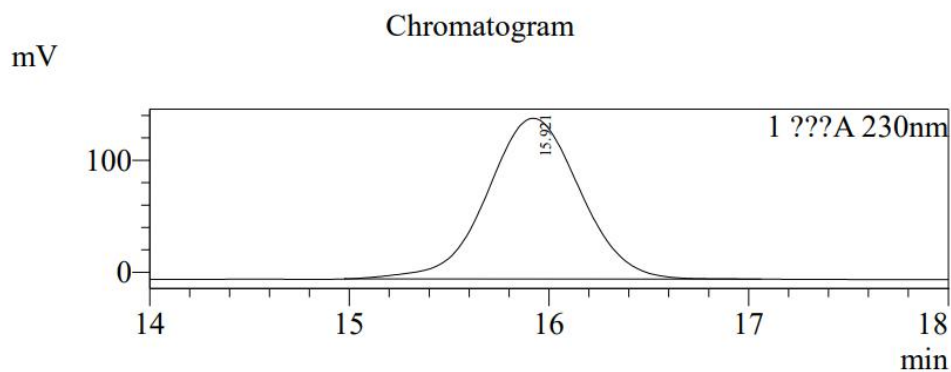

Peak Table

??A 230nm

| Peak# | Ret. Time | Area    | Height | Area%   |
|-------|-----------|---------|--------|---------|
| 1     | 15.921    | 4658443 | 143539 | 100.000 |
| Total |           | 4658443 | 143539 | 100.000 |

## **4. References**

- [1] (a) R. Zhuge, L. Wu, M. Quan, N. Butt, G. Yang, W. Zhang, *Adv. Synth. Catal.*, **2017**, *359*, 1028-1036; (b) P. Nesvadba, *Synth. Commun.*, **2000**, *30*, 2825-2832.
- [2] (a) M. Ito, A. Osaku, C. Kobayashi, A. Shiibashi, T. Ikariya, *Organometallics* **2009**, *28*, 390-393.
- [3] G. Bian, W. Shan, W. Su, *J. Chem. Res.*, **2005**, 585-586.
- [4] (a) H. Xiao, Z. Chai, C.-W. Zheng, Y.-Q. Yang, W. Liu, J.-K. Zhang, G. Zhao, *Angew. Chem., Int. Ed.*, **2010**, *49*, 4467; (b) X. Han, Y. Wang, F. Zhong, Y. Lu, *J. Am. Chem. Soc.*, **2011**, *133*, 1726; (c) X. Han, Y. Wang, F. Zhong, Y. Lu, *Org. Biomol. Chem.*, **2011**, *9*, 6734-6740; (d) F. Zhong, Y. Wang, X. Han, K.-W. Huang, Yixin Lu, *Org. Lett.*, **2011**, *13*, 1310-1313; (b) J. Gong, T. Li, K. Pan, X. Wu, *Chem. Commun.*, **2011**, *47*, 1491-1493; (c) H. Zhang, C. Jiang, J. Tan, H. Hu, Y. Chen, X. Ren, H. Zhang, T. Wang, *ACS Catal.*, **2020**, *10*, 5698-5706; (e) H. Deng, Y. Wei, M. Shi, *Adv. Synth. Catal.*, **2012**, *354*, 783-789; (f) Y. Jiang, Y. Yang, Q. He, W. Du, Y. Chen, *J. Org. Chem.*, **2020**, *85*, 10760-10771.



## 5. X-ray data of compound 3e and 5

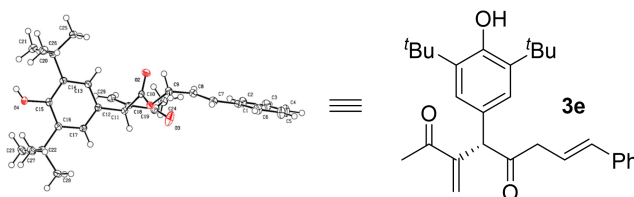

Table 1. Crystal data and structure refinement for Orth-full\_a-finalcif.

|                                   |                                                |         |
|-----------------------------------|------------------------------------------------|---------|
| Identification code               | Orth-full_a                                    |         |
| Empirical formula                 | C <sub>29</sub> H <sub>36</sub> O <sub>4</sub> |         |
| Formula weight                    | 448.58                                         |         |
| Temperature                       | 100(2) K                                       |         |
| Wavelength                        | 1.54178 ?                                      |         |
| Crystal system                    | Orthorhombic                                   |         |
| Space group                       | P2 <sub>1</sub> 2 <sub>1</sub> 2               |         |
| Unit cell dimensions              | a = 18.9096(6) ?                               | a = 90? |
|                                   | b = 22.5975(8) ?                               | b = 90? |
|                                   | c = 5.9615(2) ?                                | g = 90? |
| Volume                            | 2547.41(15) ? <sup>3</sup>                     |         |
| Z                                 | 4                                              |         |
| Density (calculated)              | 1.170 Mg/m <sup>3</sup>                        |         |
| Absorption coefficient            | 0.604 mm <sup>-1</sup>                         |         |
| F(000)                            | 968                                            |         |
| Crystal size                      | 0.25 x 0.08 x 0.06 mm <sup>3</sup>             |         |
| Theta range for data collection   | 3.912 to 72.210?                               |         |
| Index ranges                      | -23 ≤ h ≤ 22, -27 ≤ k ≤ 27, -7 ≤ l ≤ 7         |         |
| Reflections collected             | 30354                                          |         |
| Independent reflections           | 5037 [R(int) = 0.0454]                         |         |
| Completeness to theta = 67.679?   | 99.9 %                                         |         |
| Absorption correction             | Semi-empirical from equivalents                |         |
| Max. and min. transmission        | 0.964 and 0.944                                |         |
| Refinement method                 | Full-matrix least-squares on F <sup>2</sup>    |         |
| Data / restraints / parameters    | 5037 / 3 / 308                                 |         |
| Goodness-of-fit on F <sup>2</sup> | 1.073                                          |         |
| Final R indices [I > 2σ(I)]       | R1 = 0.0300, wR2 = 0.0780                      |         |
| R indices (all data)              | R1 = 0.0324, wR2 = 0.0794                      |         |
| Absolute structure parameter      | -0.01(6)                                       |         |
| Extinction coefficient            | n/a                                            |         |
| Largest diff. peak and hole       | 0.187 and -0.241 e. <sup>-3</sup>              |         |

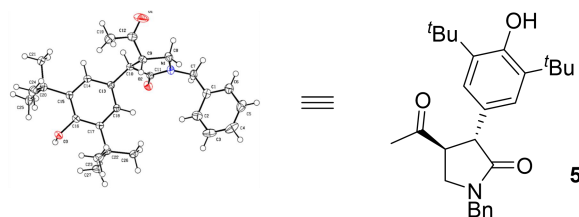

Table 1. Crystal data and structure refinement for ORTH-FULL2\_a-finalcif.

|                                   |                                                  |         |
|-----------------------------------|--------------------------------------------------|---------|
| Identification code               | ORTH-FULL2_a                                     |         |
| Empirical formula                 | C <sub>27</sub> H <sub>35</sub> N O <sub>3</sub> |         |
| Formula weight                    | 421.56                                           |         |
| Temperature                       | 100(2) K                                         |         |
| Wavelength                        | 1.54178 ?                                        |         |
| Crystal system                    | Orthorhombic                                     |         |
| Space group                       | P2 <sub>1</sub> 2 <sub>1</sub> 2 <sub>1</sub>    |         |
| Unit cell dimensions              | a = 10.0735(3) ?                                 | a = 90? |
|                                   | b = 10.4515(3) ?                                 | b = 90? |
|                                   | c = 22.6325(7) ?                                 | g = 90? |
| Volume                            | 2382.82(12) ? <sup>3</sup>                       |         |
| Z                                 | 4                                                |         |
| Density (calculated)              | 1.175 Mg/m <sup>3</sup>                          |         |
| Absorption coefficient            | 0.593 mm <sup>-1</sup>                           |         |
| F(000)                            | 912                                              |         |
| Crystal size                      | 0.2 x 0.15 x 0.12 mm <sup>3</sup>                |         |
| Theta range for data collection   | 3.906 to 72.378?                                 |         |
| Index ranges                      | -11 ≤ h ≤ 12, -12 ≤ k ≤ 12, -27 ≤ l ≤ 27         |         |
| Reflections collected             | 54308                                            |         |
| Independent reflections           | 4703 [R(int) = 0.0575]                           |         |
| Completeness to theta = 67.679?   | 99.7 %                                           |         |
| Absorption correction             | Semi-empirical from equivalents                  |         |
| Max. and min. transmission        | 0.931 and 0.899                                  |         |
| Refinement method                 | Full-matrix least-squares on F <sup>2</sup>      |         |
| Data / restraints / parameters    | 4703 / 1 / 290                                   |         |
| Goodness-of-fit on F <sup>2</sup> | 1.038                                            |         |
| Final R indices [I > 2σ(I)]       | R1 = 0.0284, wR2 = 0.0694                        |         |
| R indices (all data)              | R1 = 0.0306, wR2 = 0.0709                        |         |
| Absolute structure parameter      | 0.07(6)                                          |         |
| Extinction coefficient            | n/a                                              |         |
| Largest diff. peak and hole       | 0.162 and -0.166 e. <sup>-3</sup>                |         |

## 6. NMR Spectra

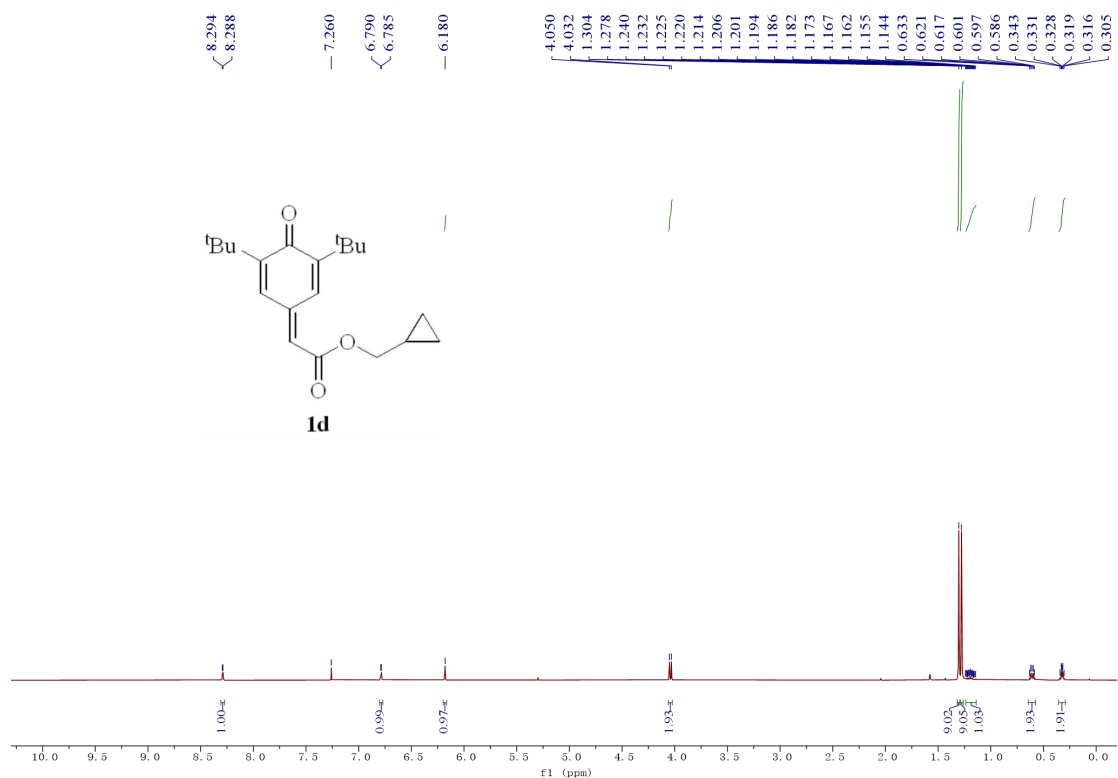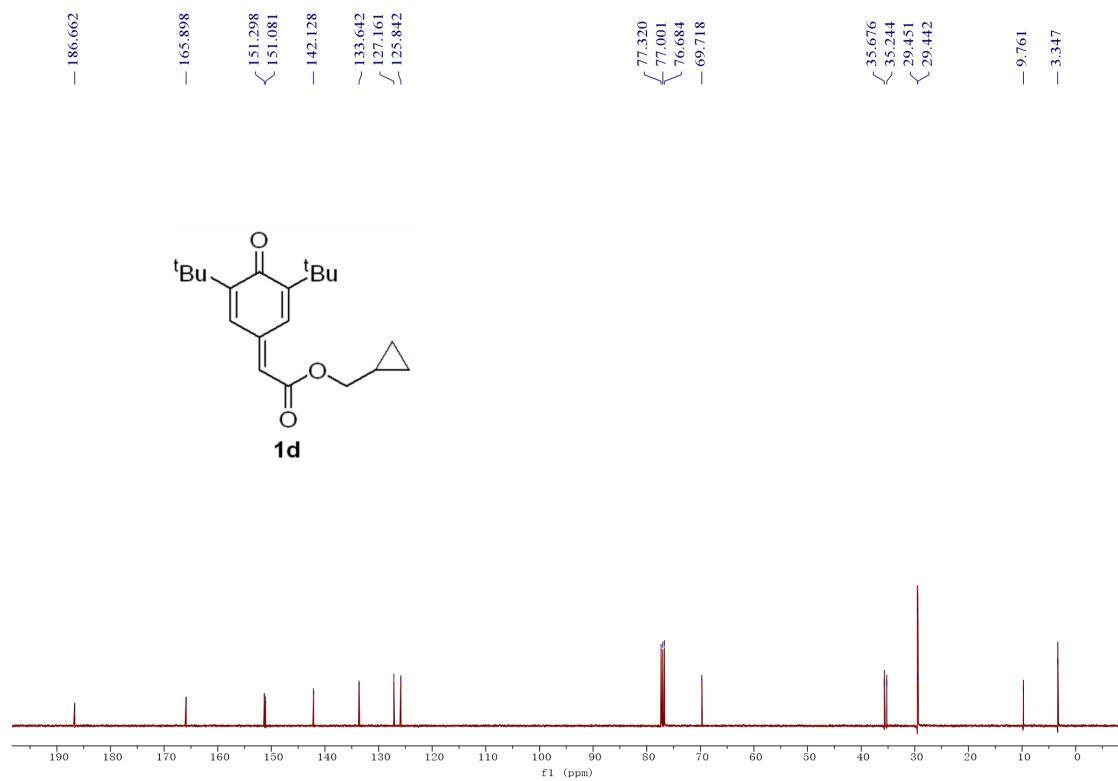

<sup>1</sup>H and <sup>13</sup>C NMR spectra of compound **1d**

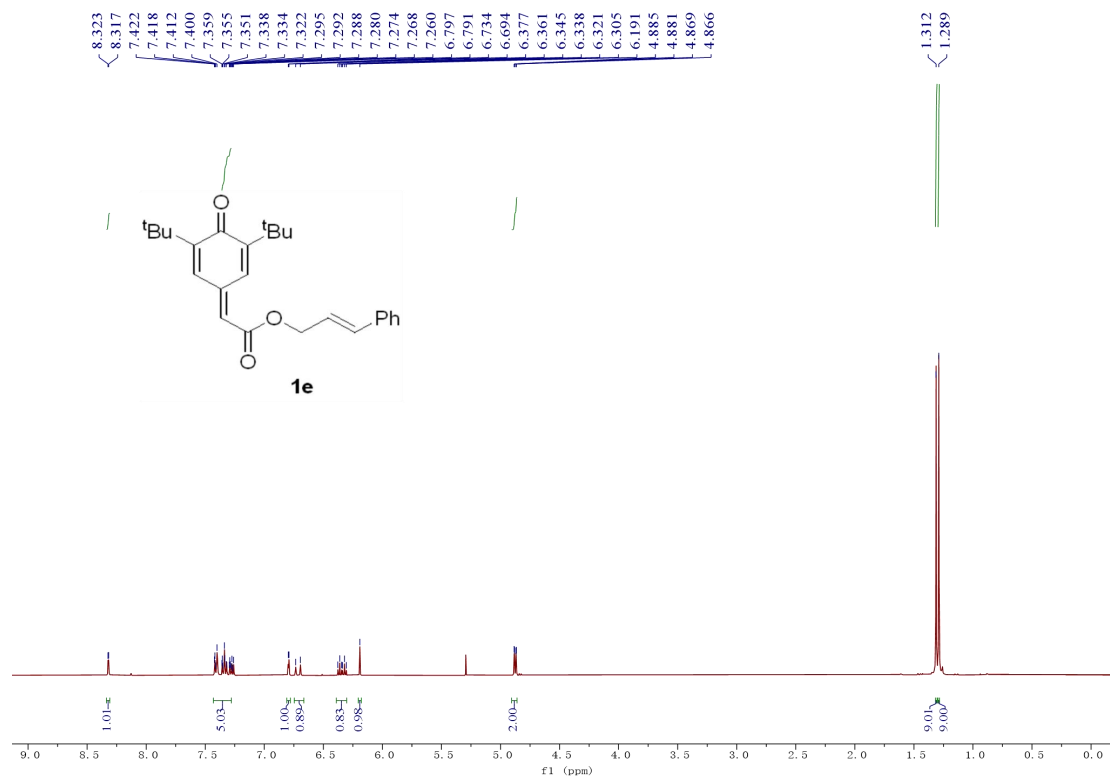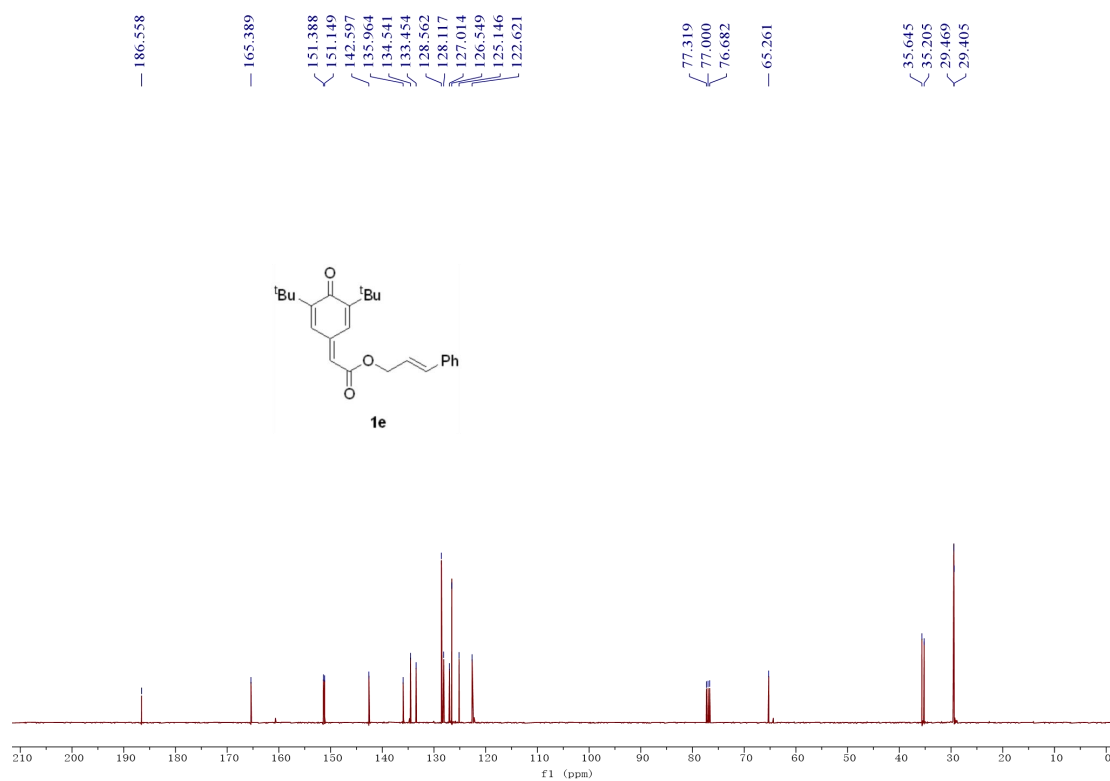

**<sup>1</sup>H and <sup>13</sup>C NMR spectra of compound 1e**

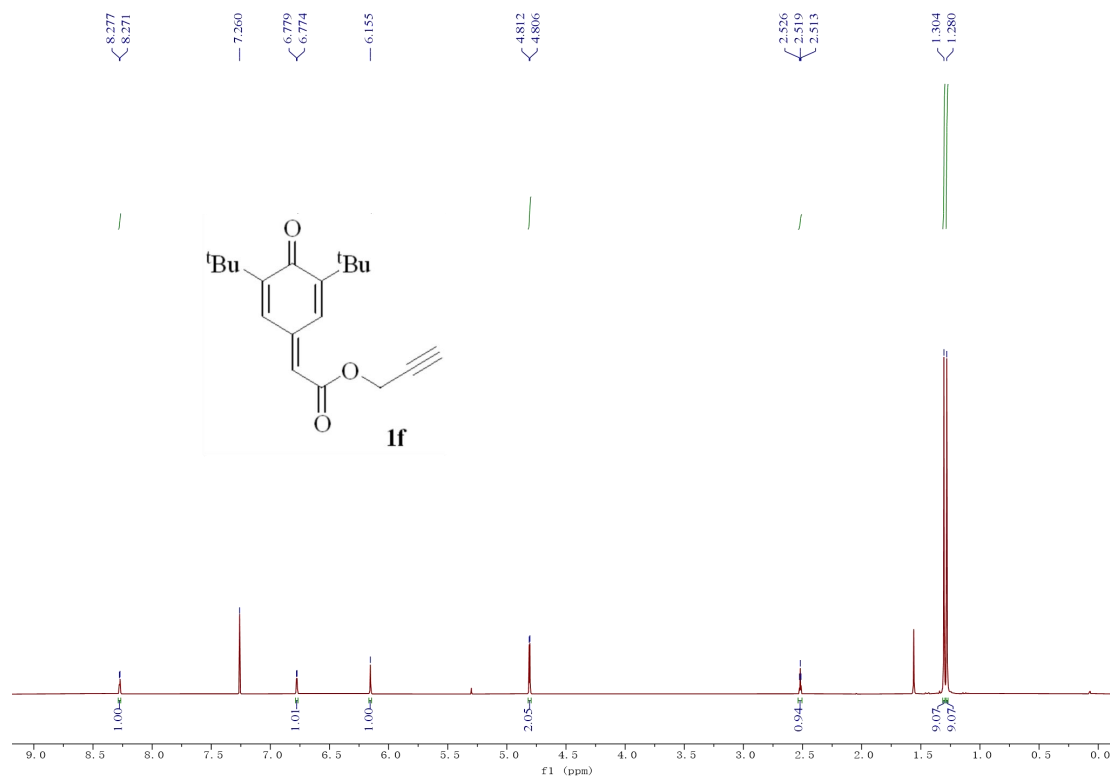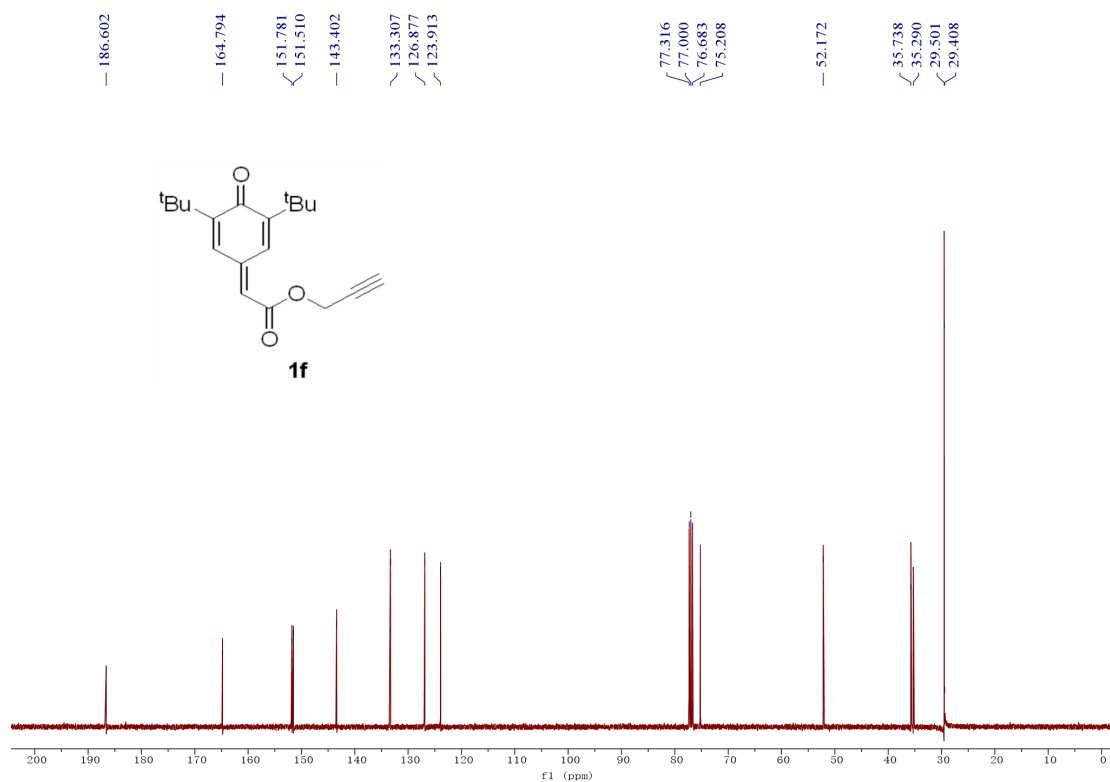

<sup>1</sup>H and <sup>13</sup>C NMR spectra of compound **1f**

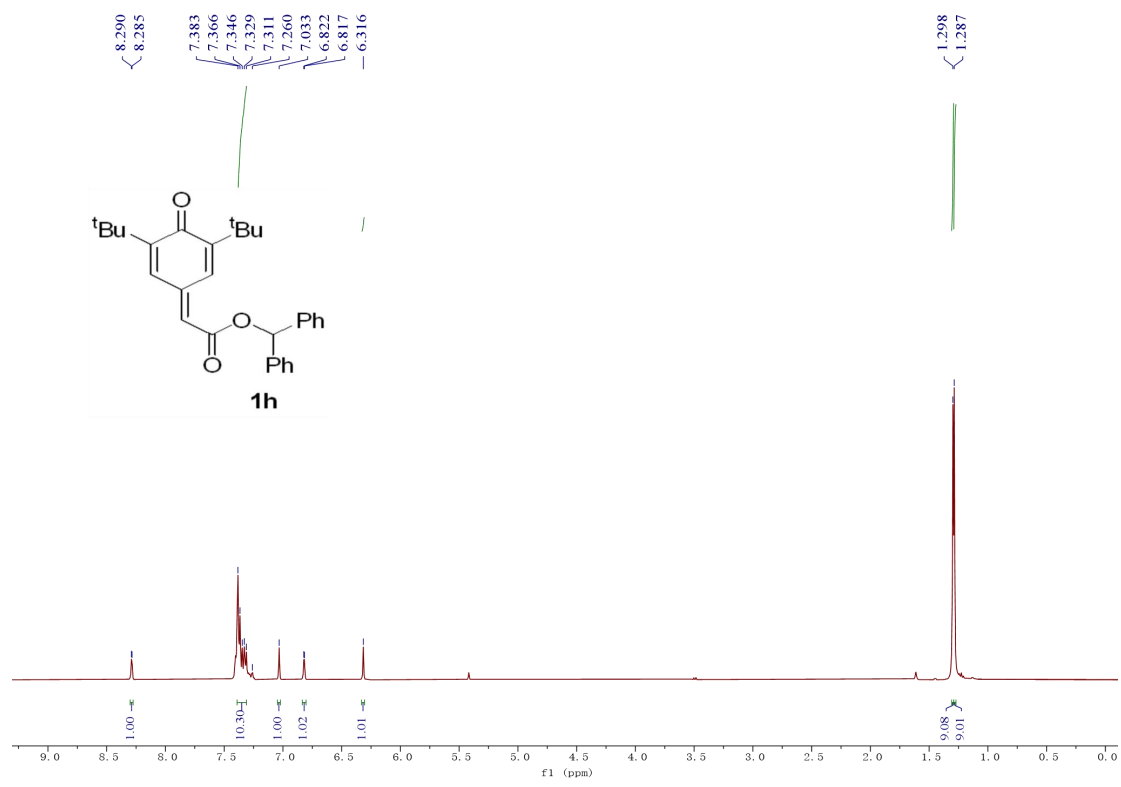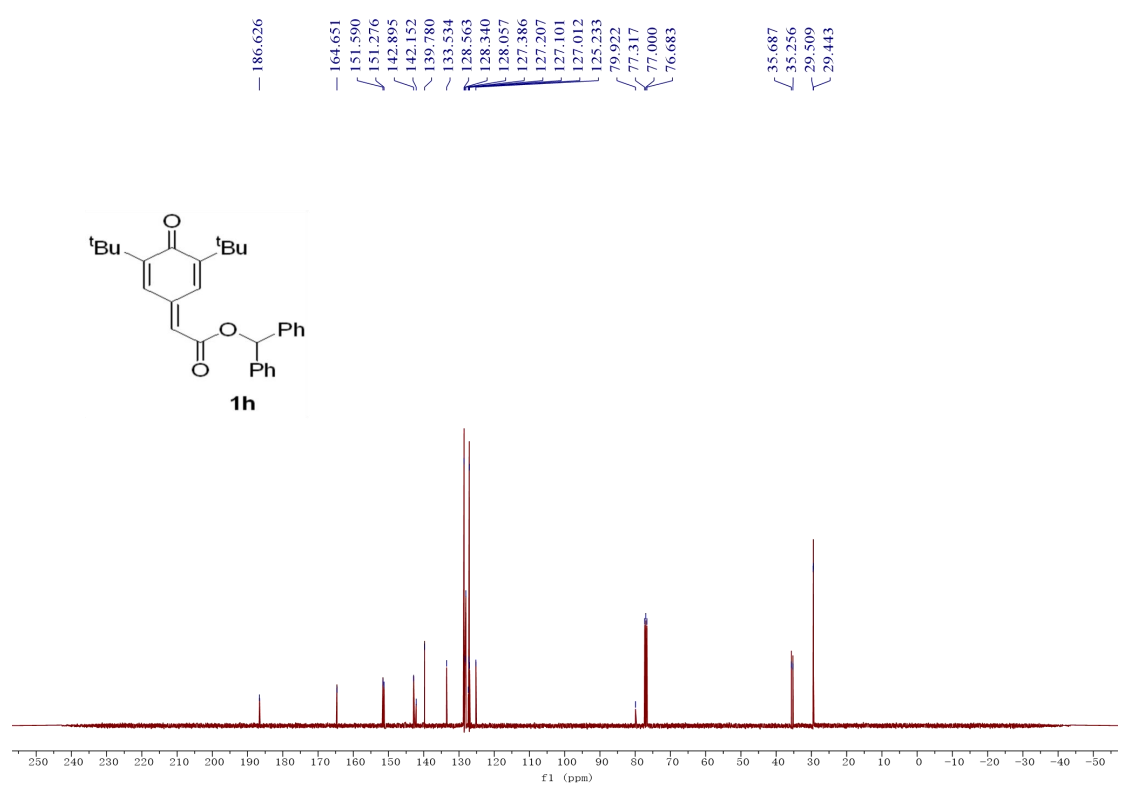

<sup>1</sup>H and <sup>13</sup>C NMR spectra of compound **1h**

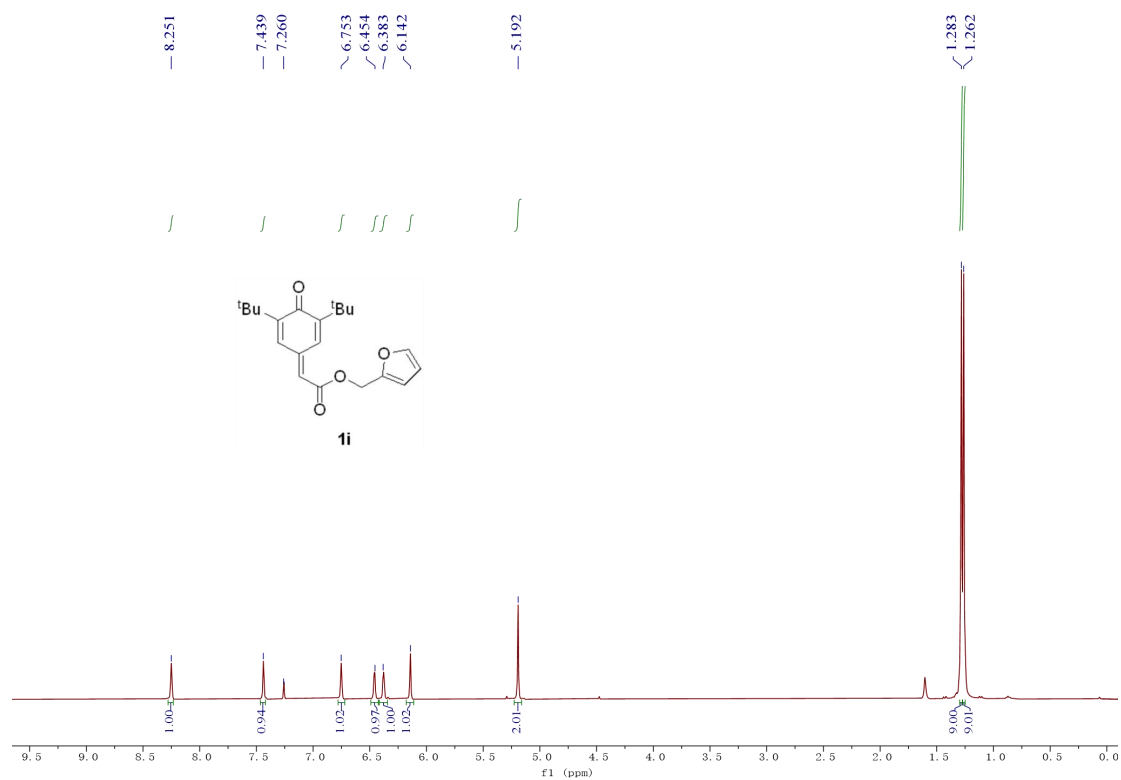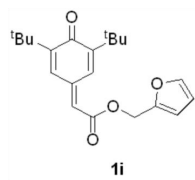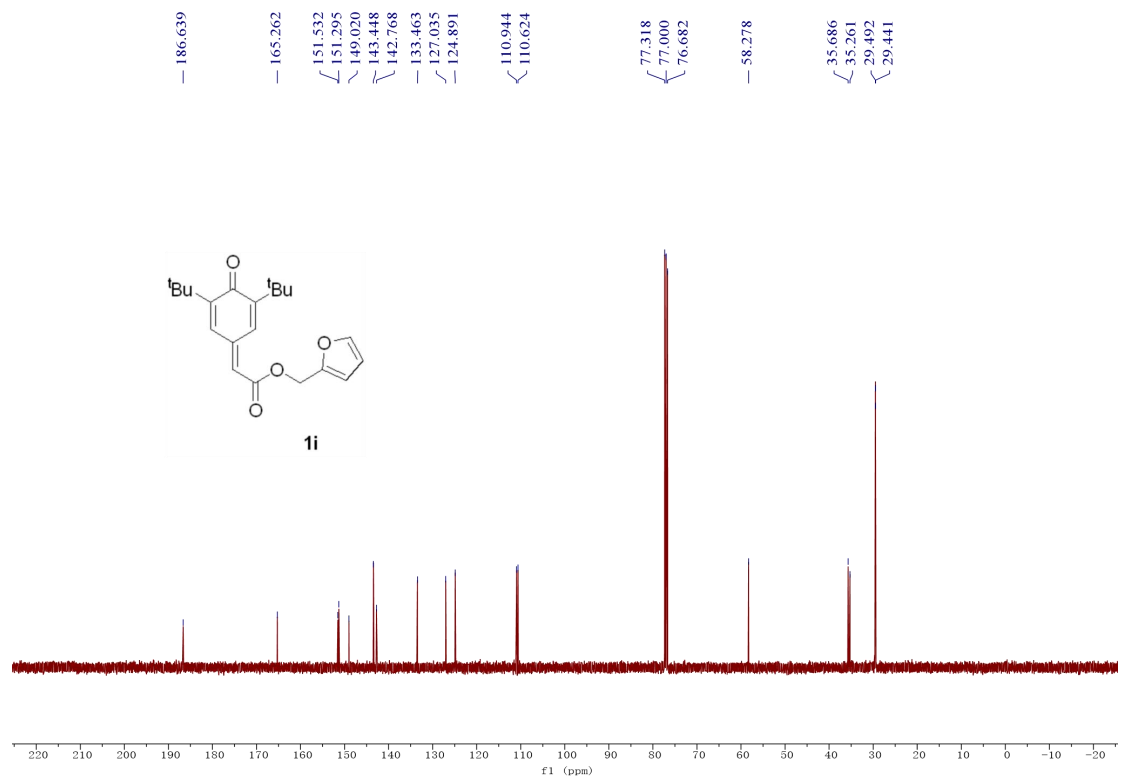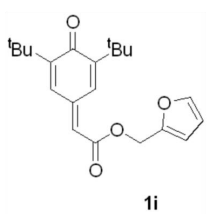

<sup>1</sup>H and <sup>13</sup>C NMR spectra of compound **1i**

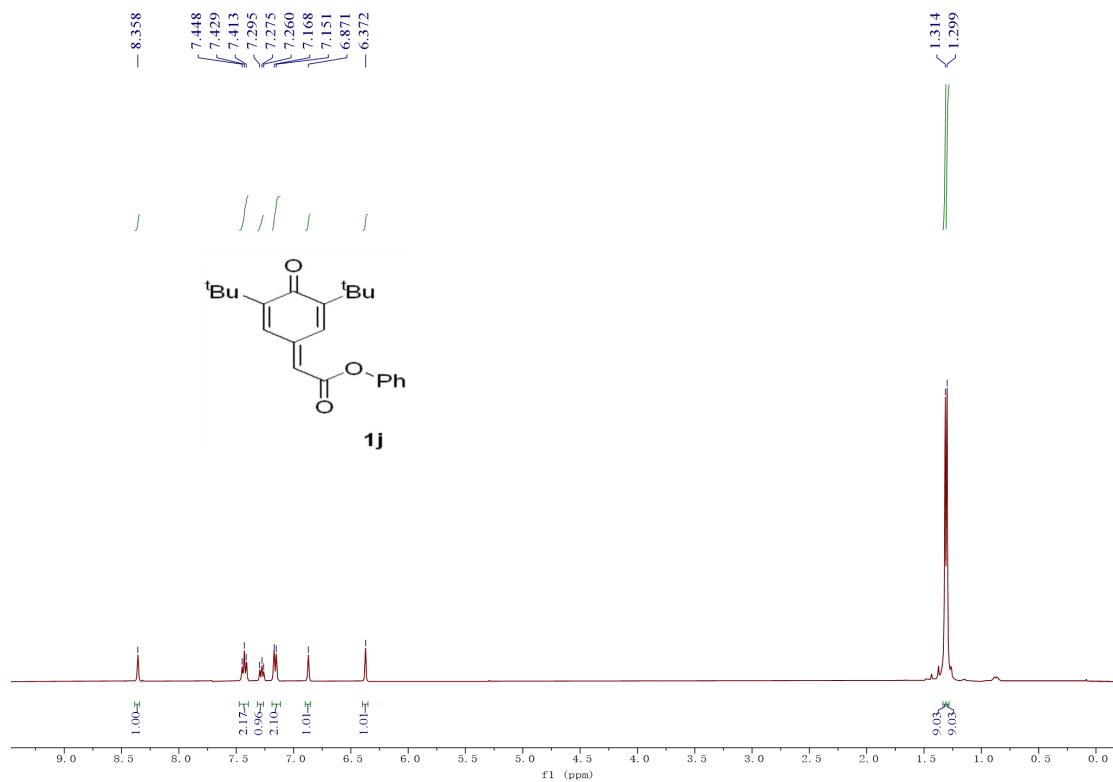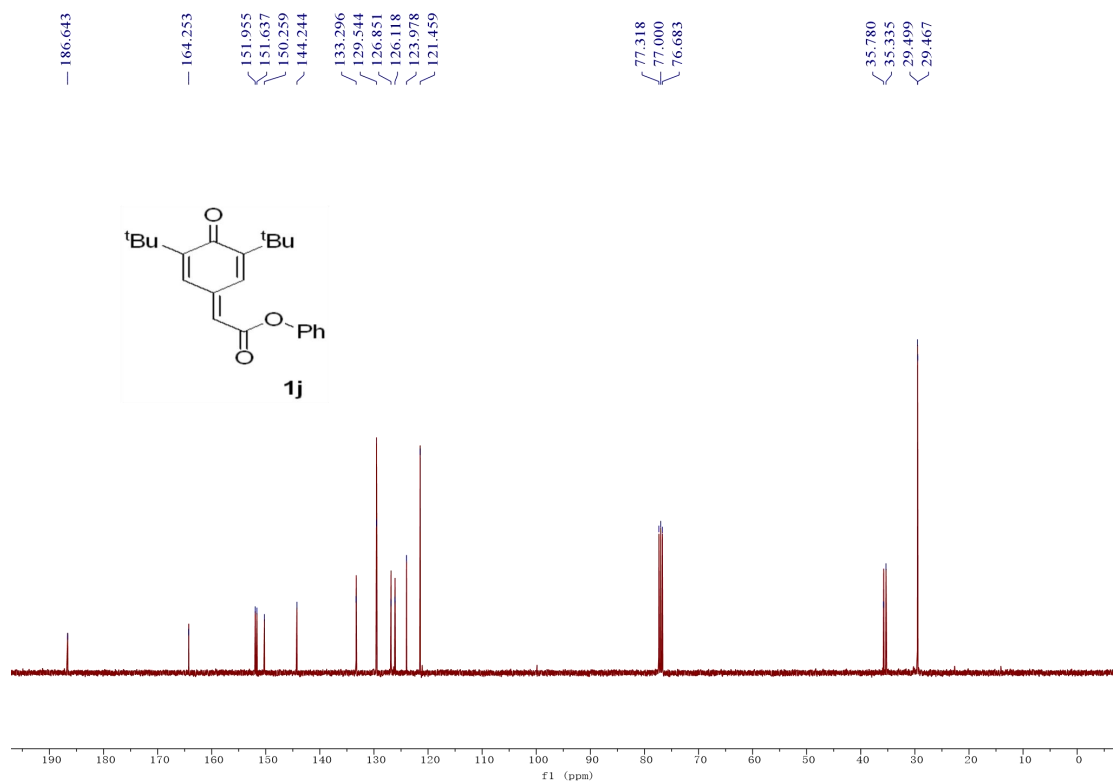

<sup>1</sup>H and <sup>13</sup>C NMR spectra of compound **1j**



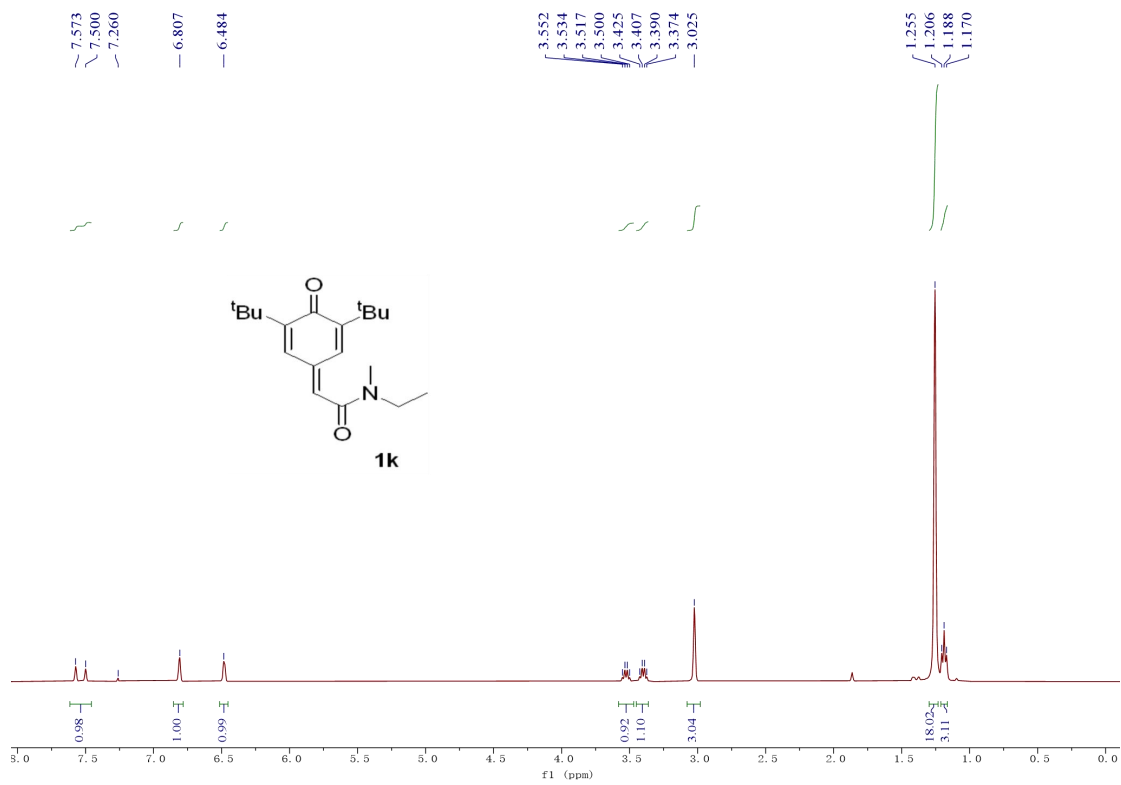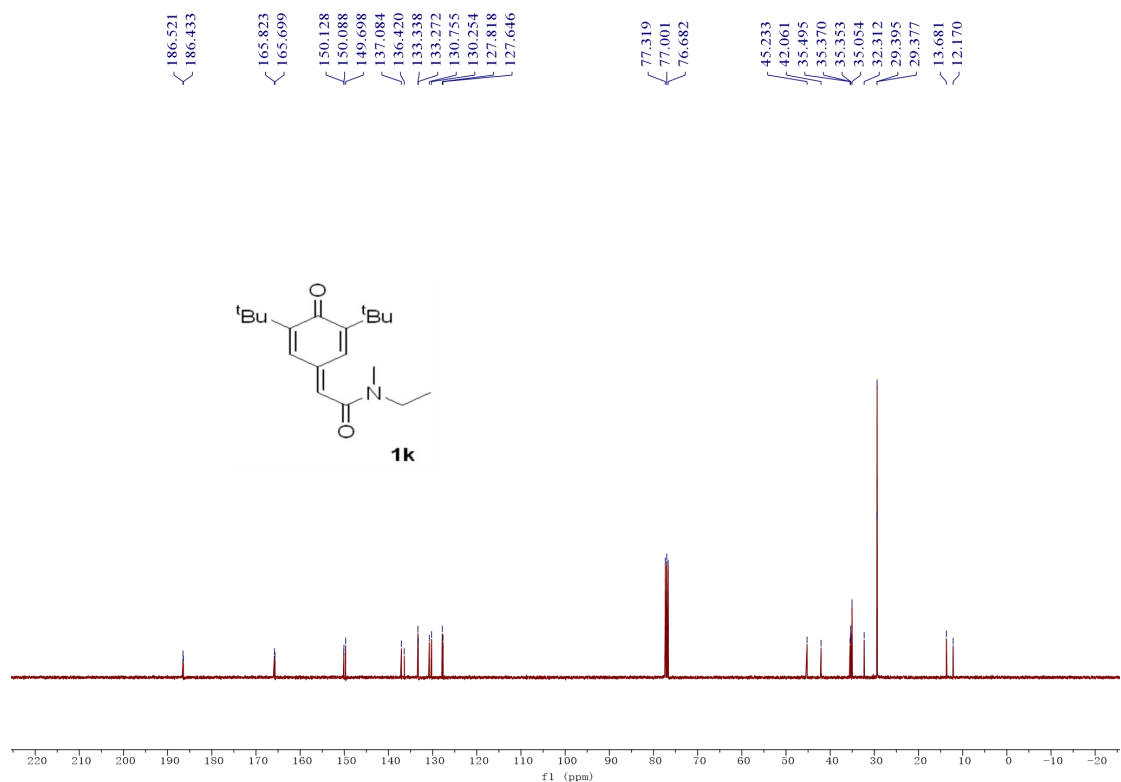

<sup>1</sup>H and <sup>13</sup>C NMR spectra of compound **1k**

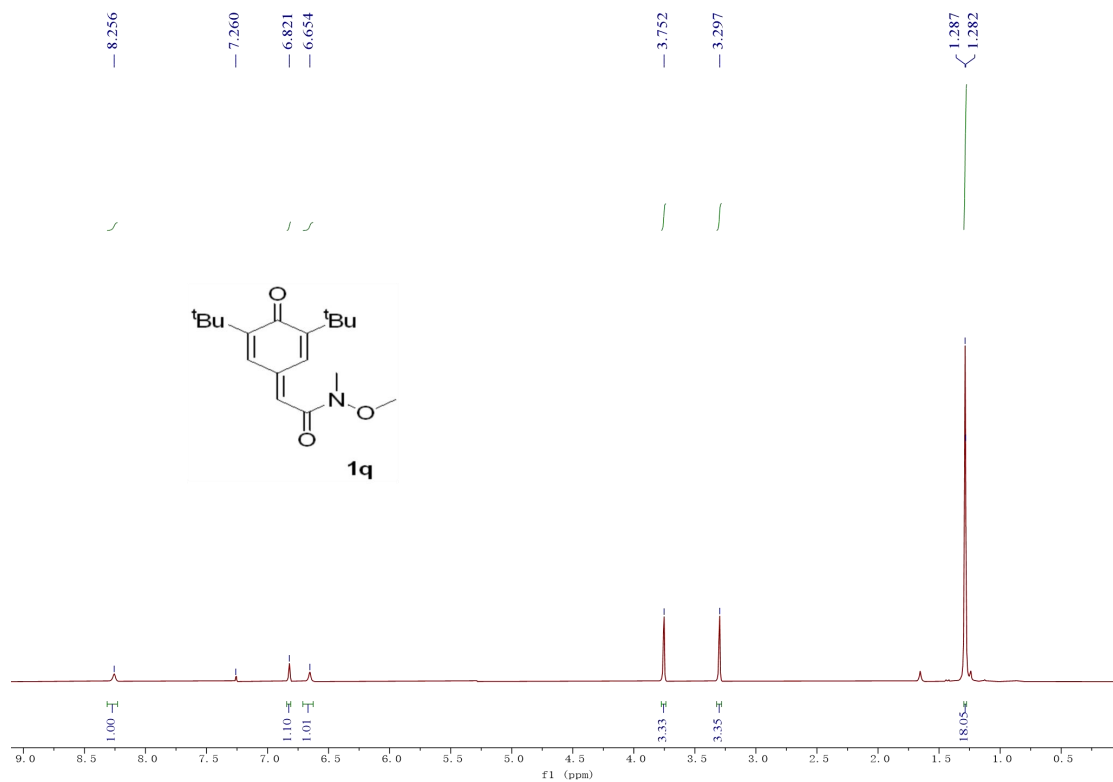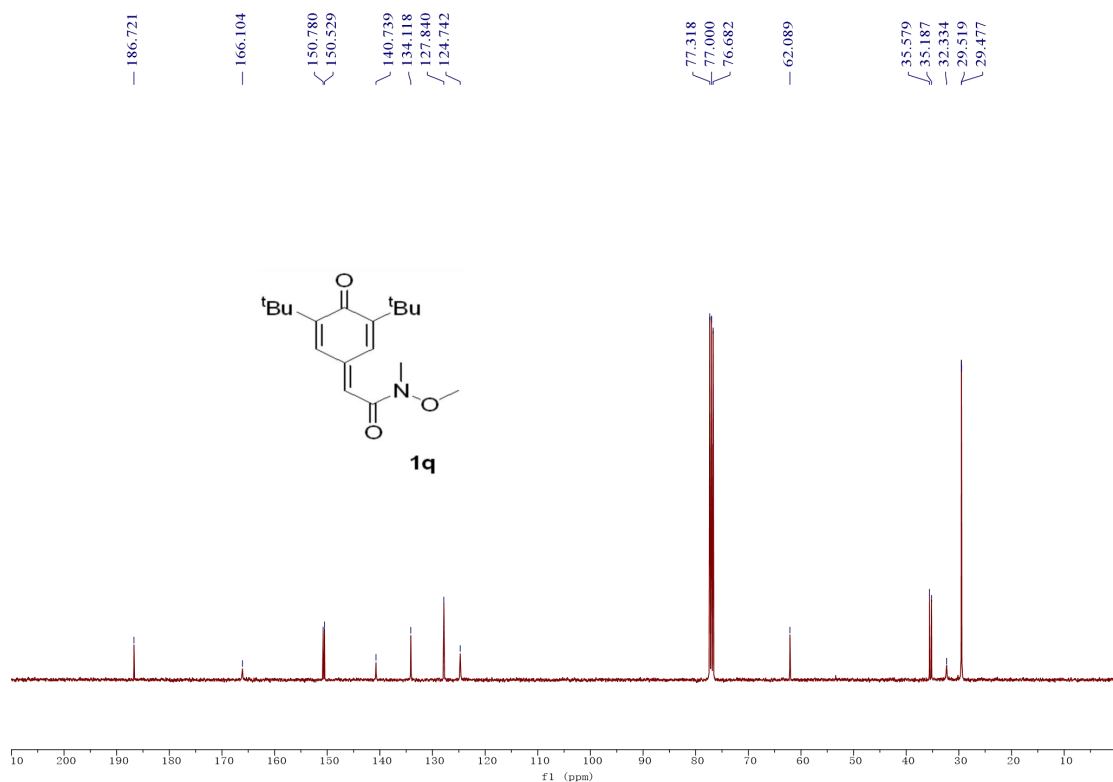

<sup>1</sup>H and <sup>13</sup>C NMR spectra of compound **1q**

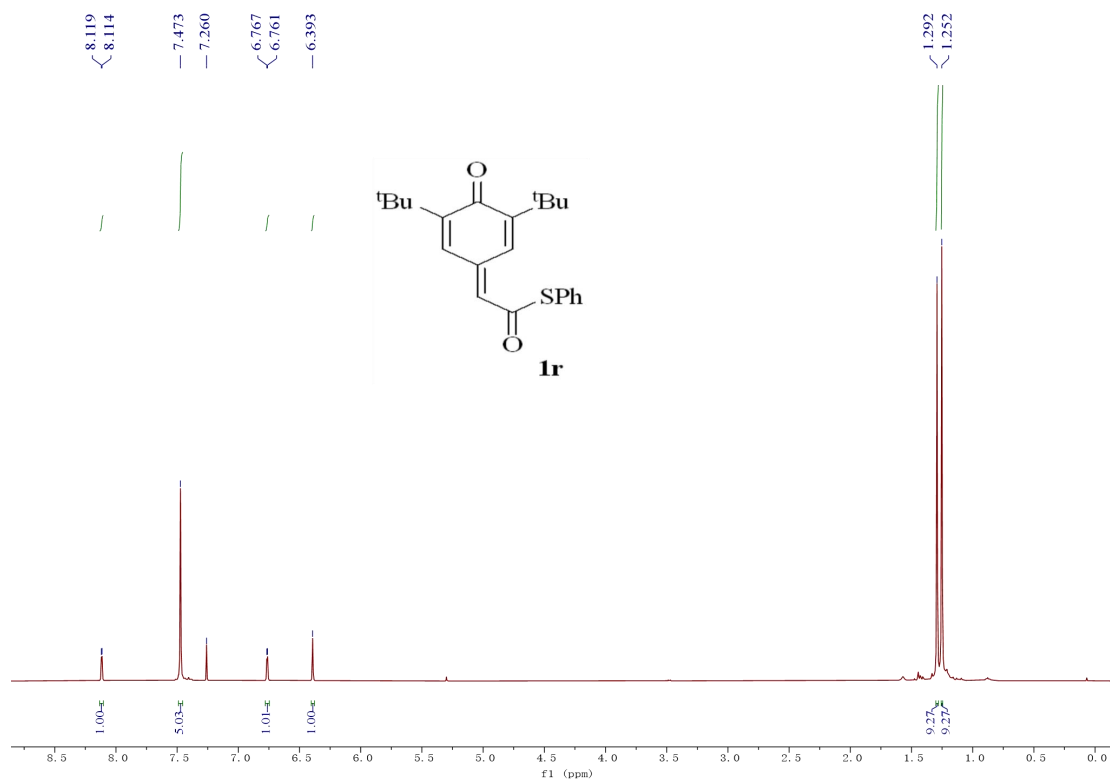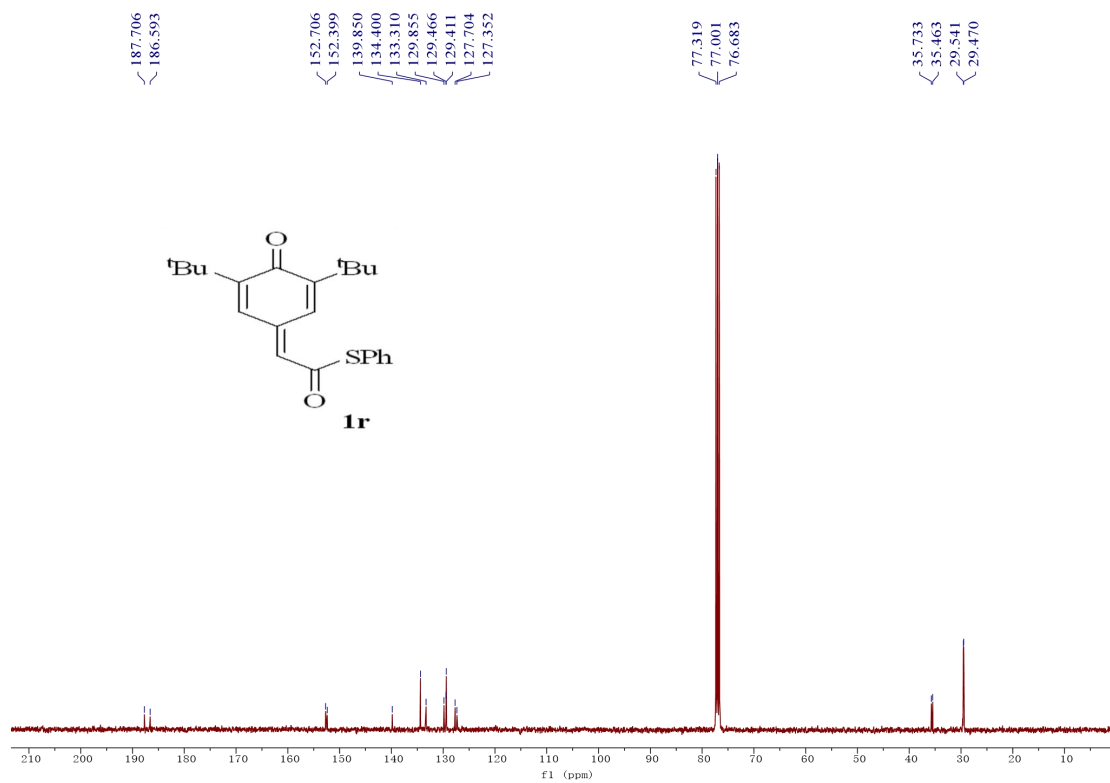

<sup>1</sup>H and <sup>13</sup>C NMR spectra of compound **1r**

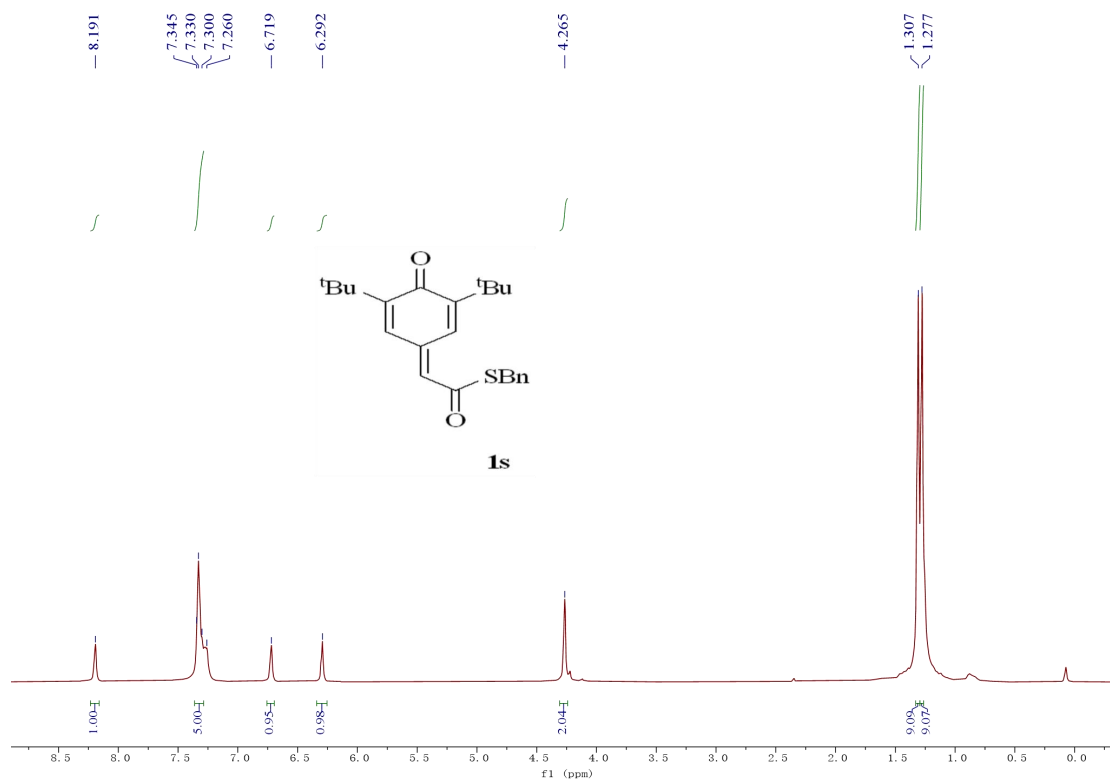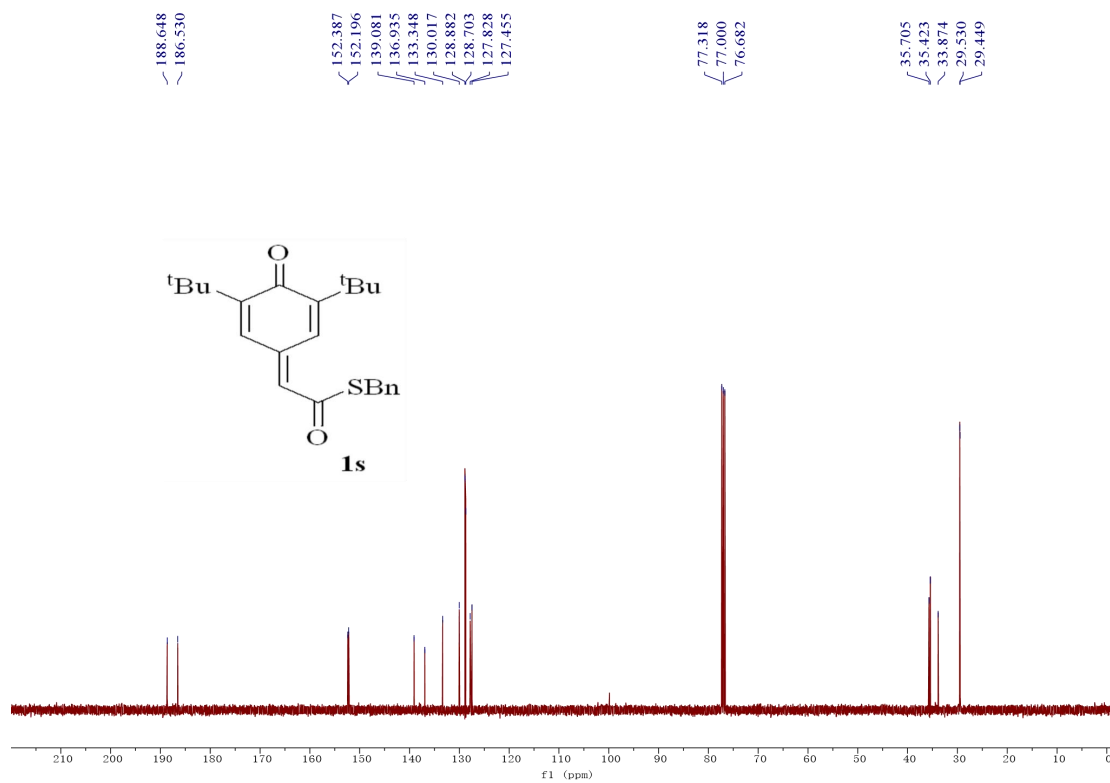

$^1\text{H}$  and  $^{13}\text{C}$  NMR spectra of compound **1s**

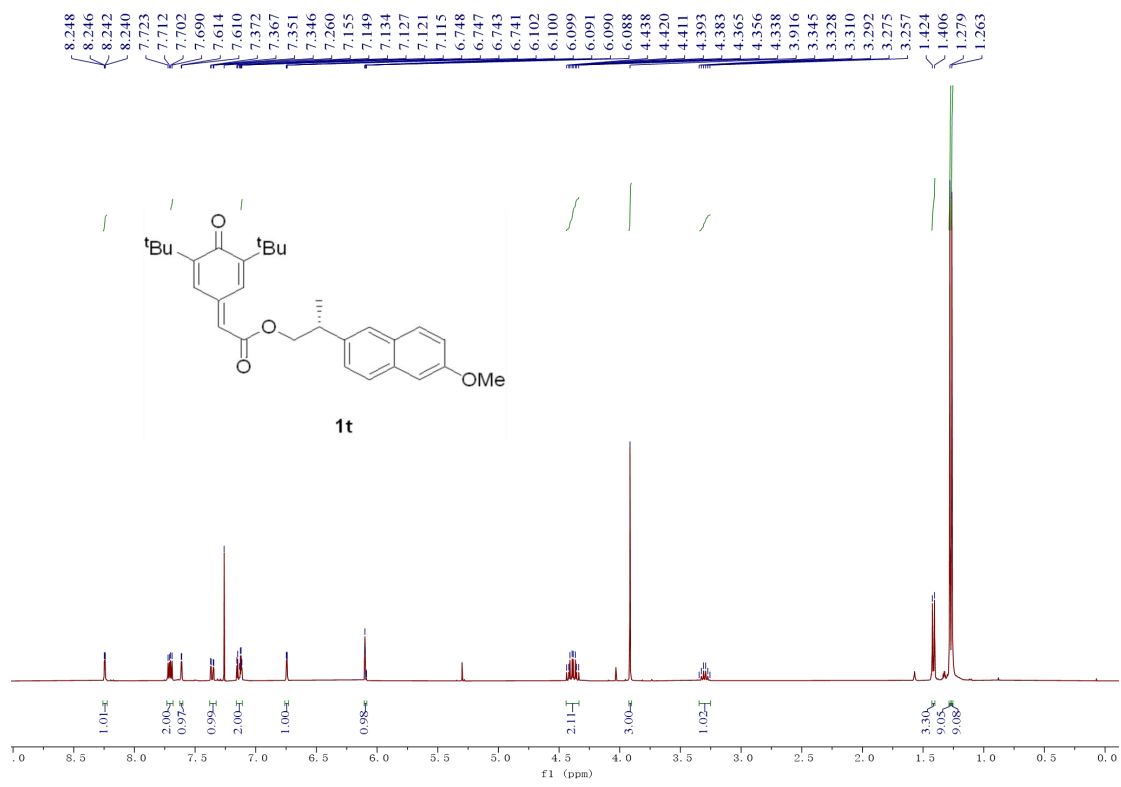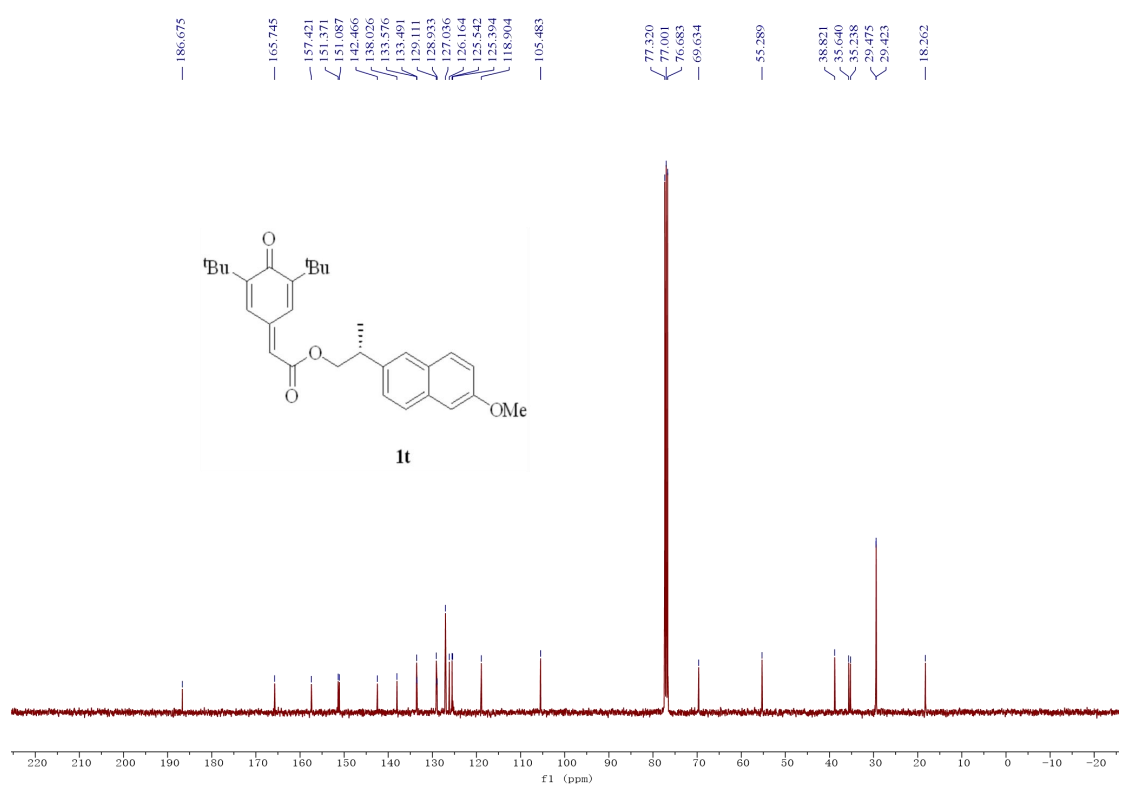

<sup>1</sup>H and <sup>13</sup>C NMR spectra of compound 1t

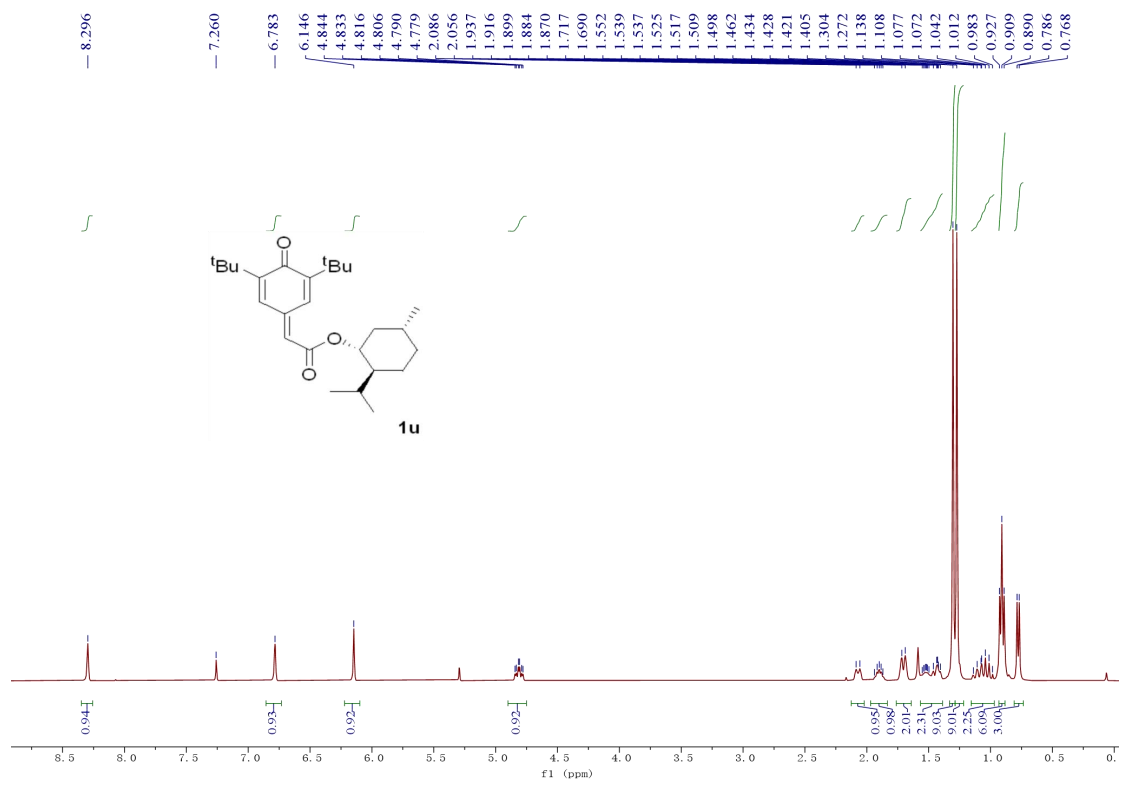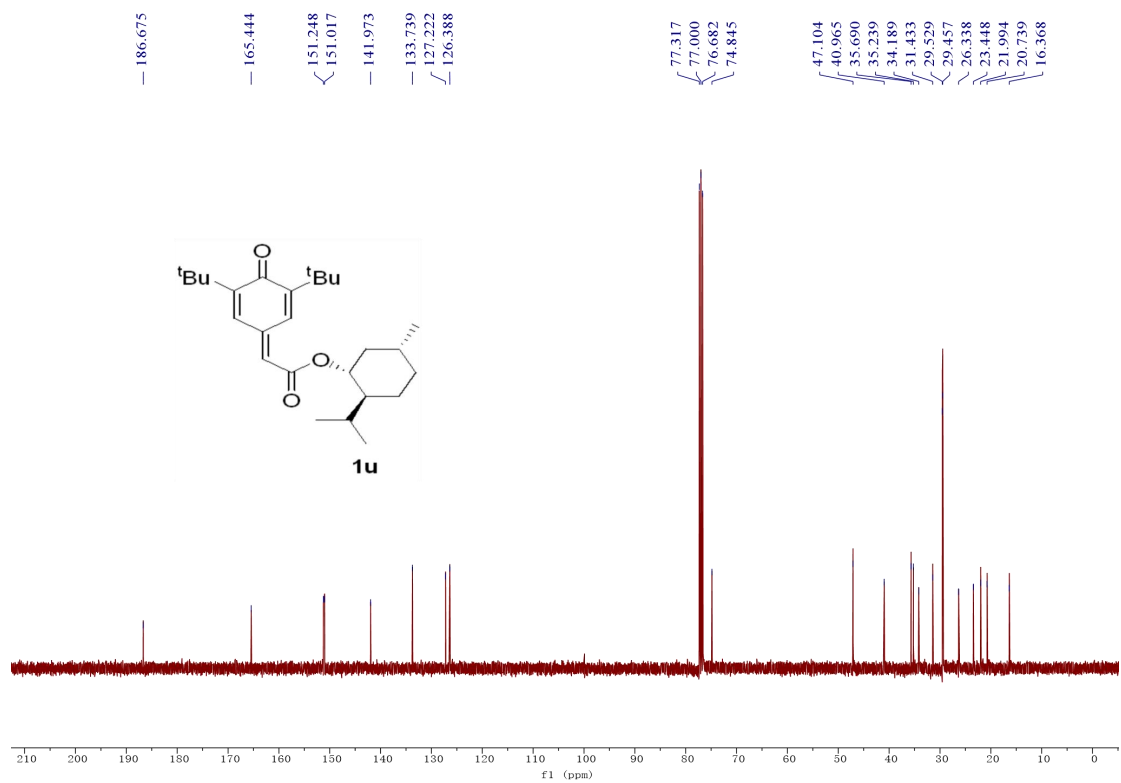

**<sup>1</sup>H and <sup>13</sup>C NMR spectra of compound 1u**

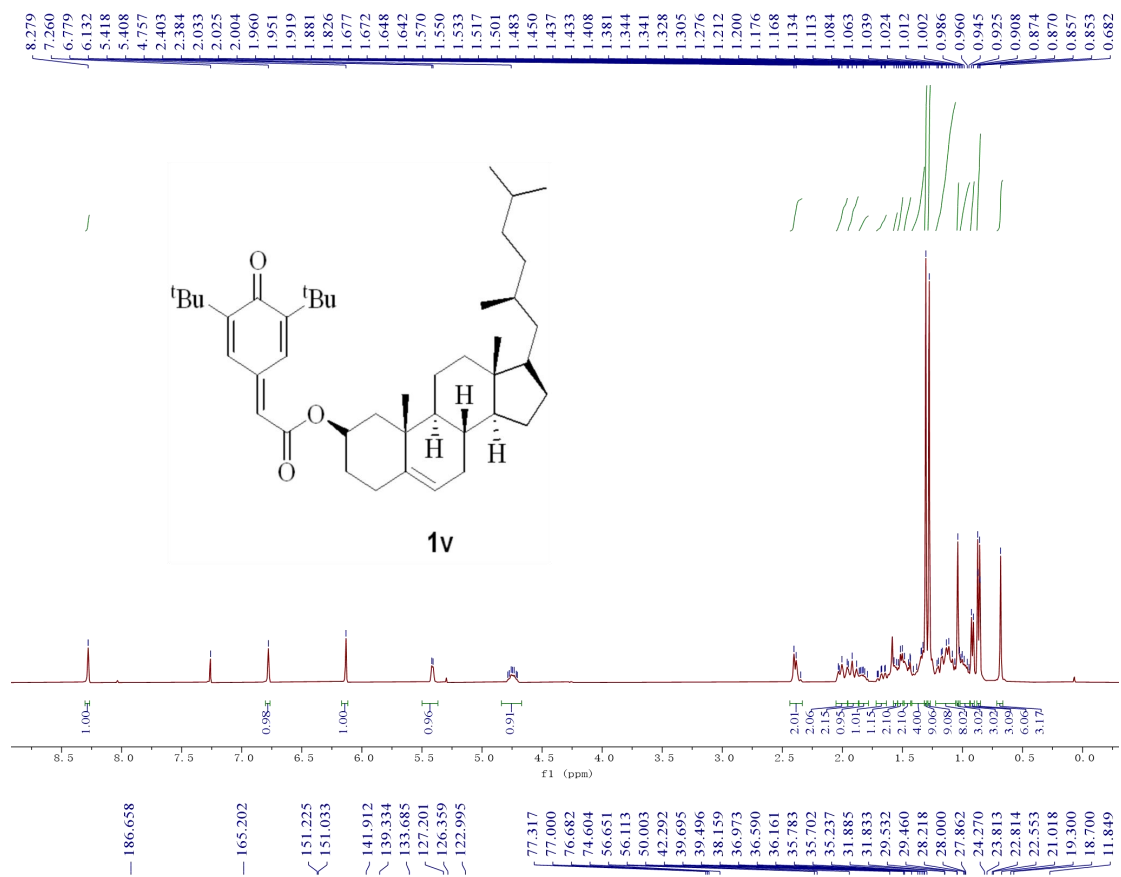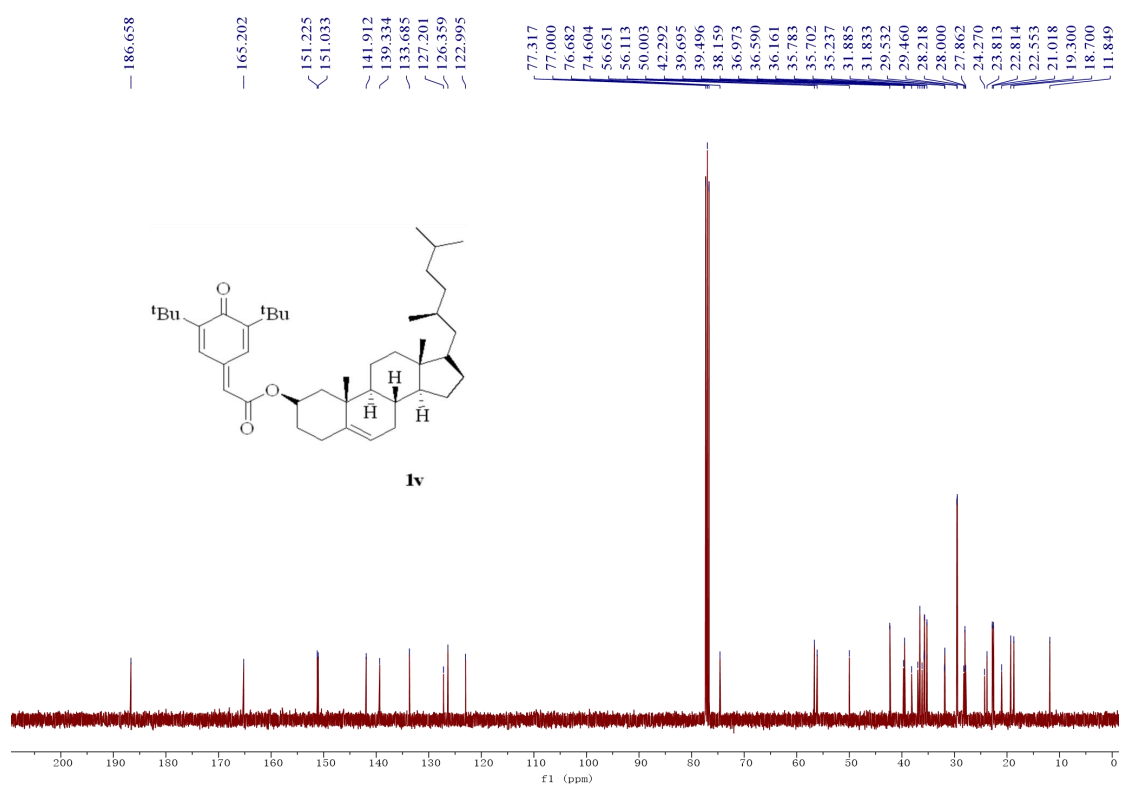

$^1\text{H}$  and  $^{13}\text{C}$  NMR spectra of compound **1v**

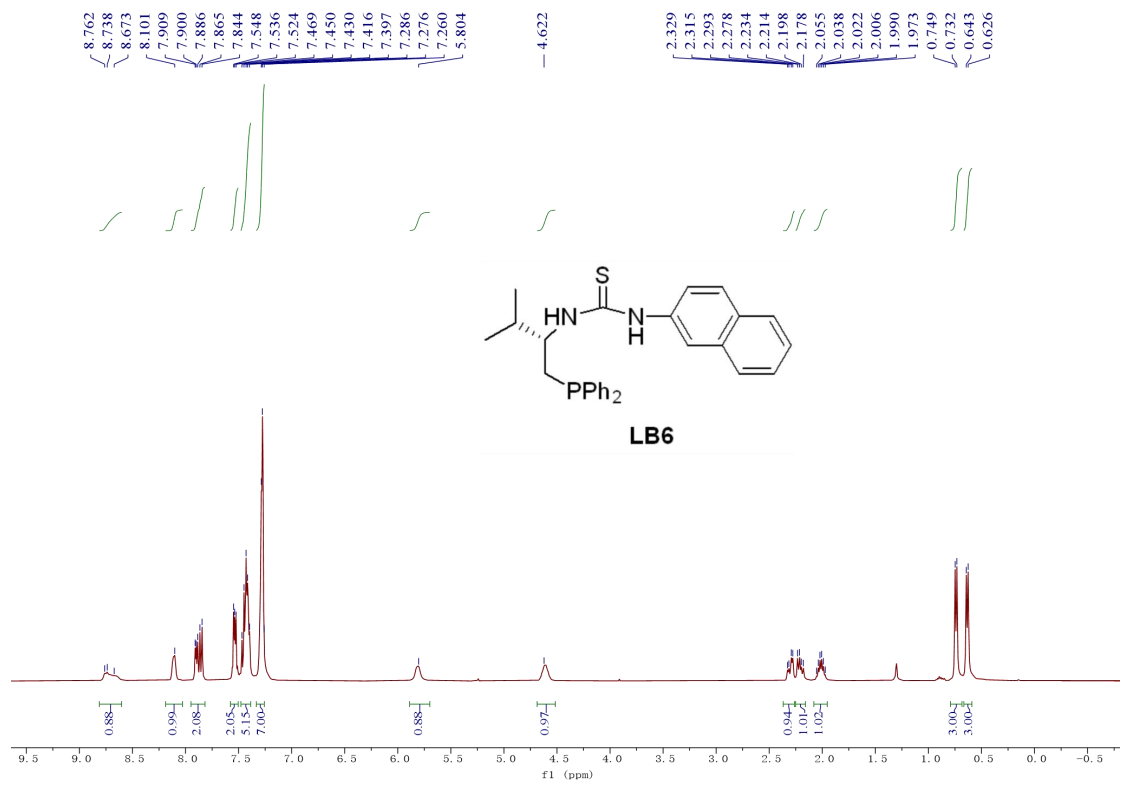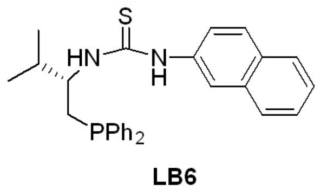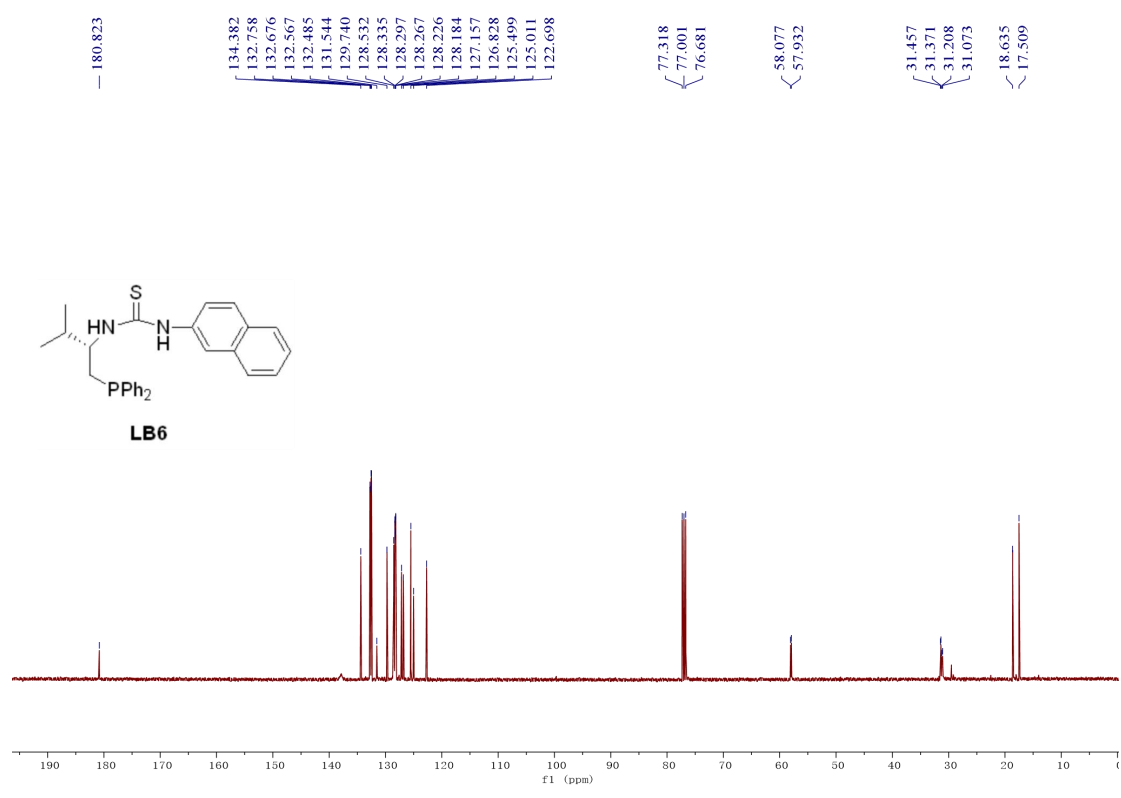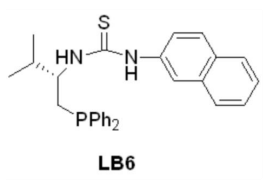



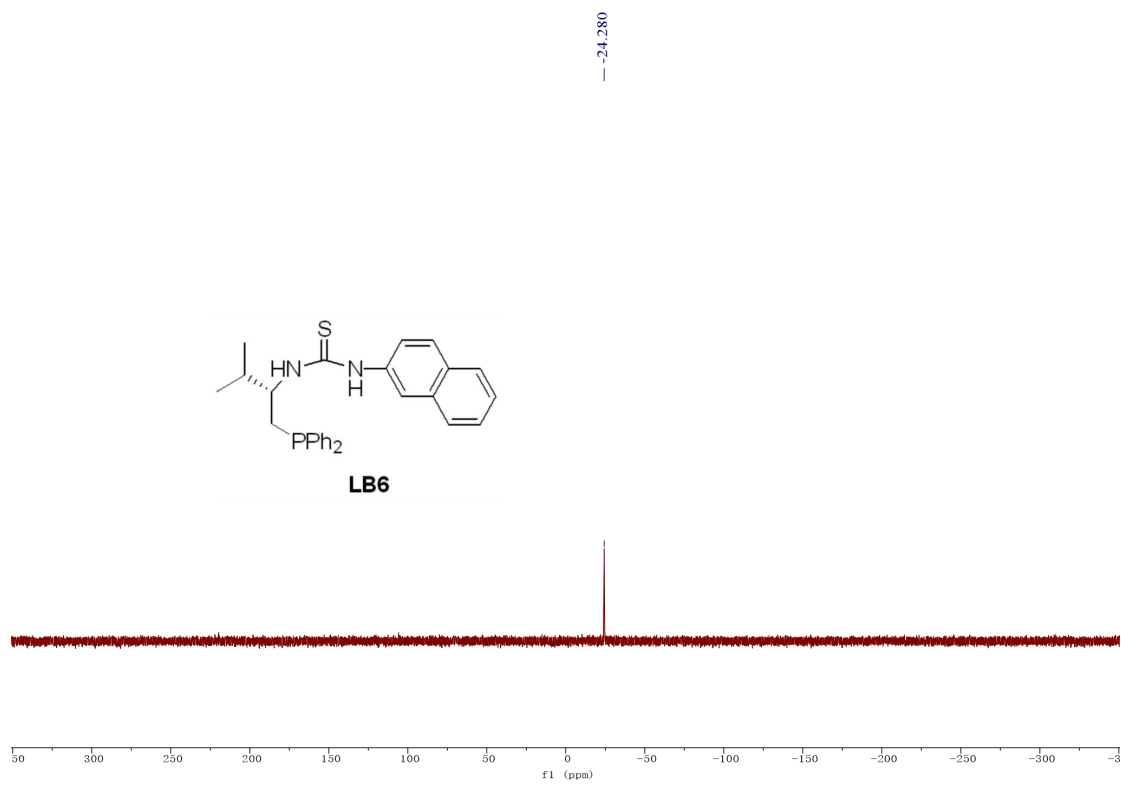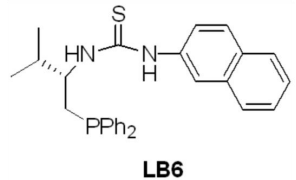

<sup>1</sup>H, <sup>13</sup>C and <sup>31</sup>P NMR spectra of compound **LB6**

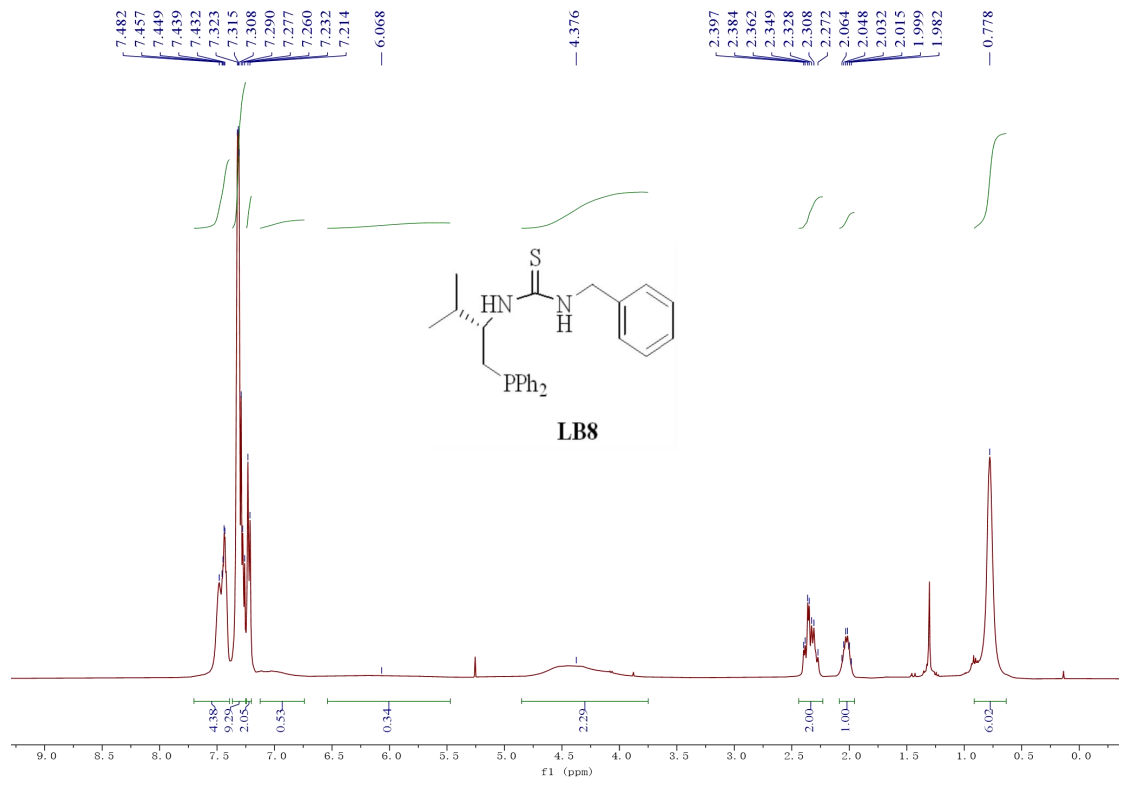

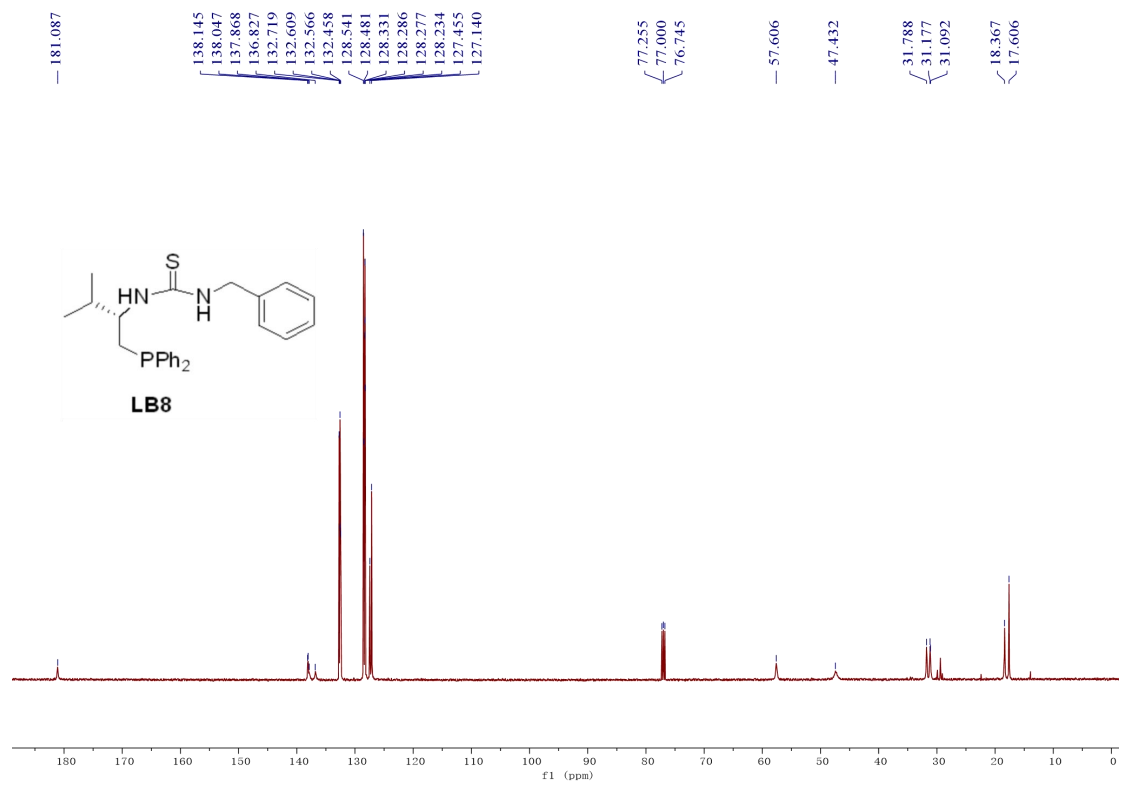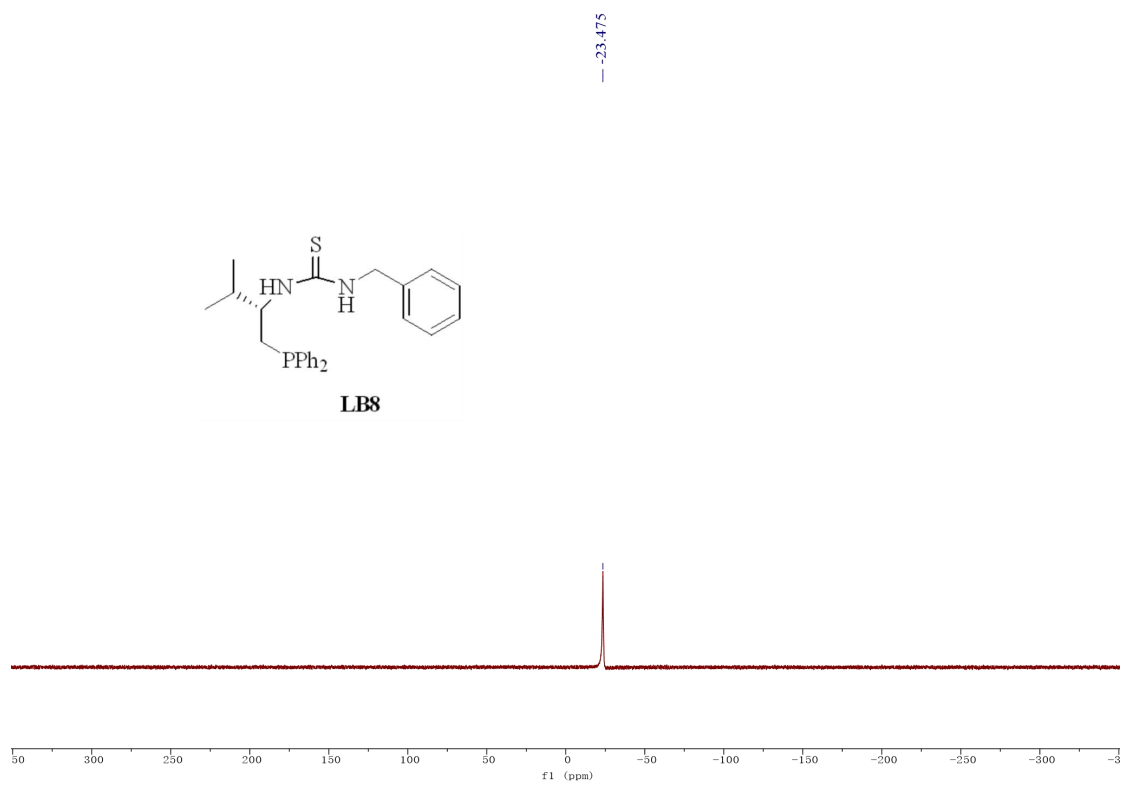

$^1\text{H}$ ,  $^{13}\text{C}$  and  $^{31}\text{P}$  NMR spectra of compound **LB8**

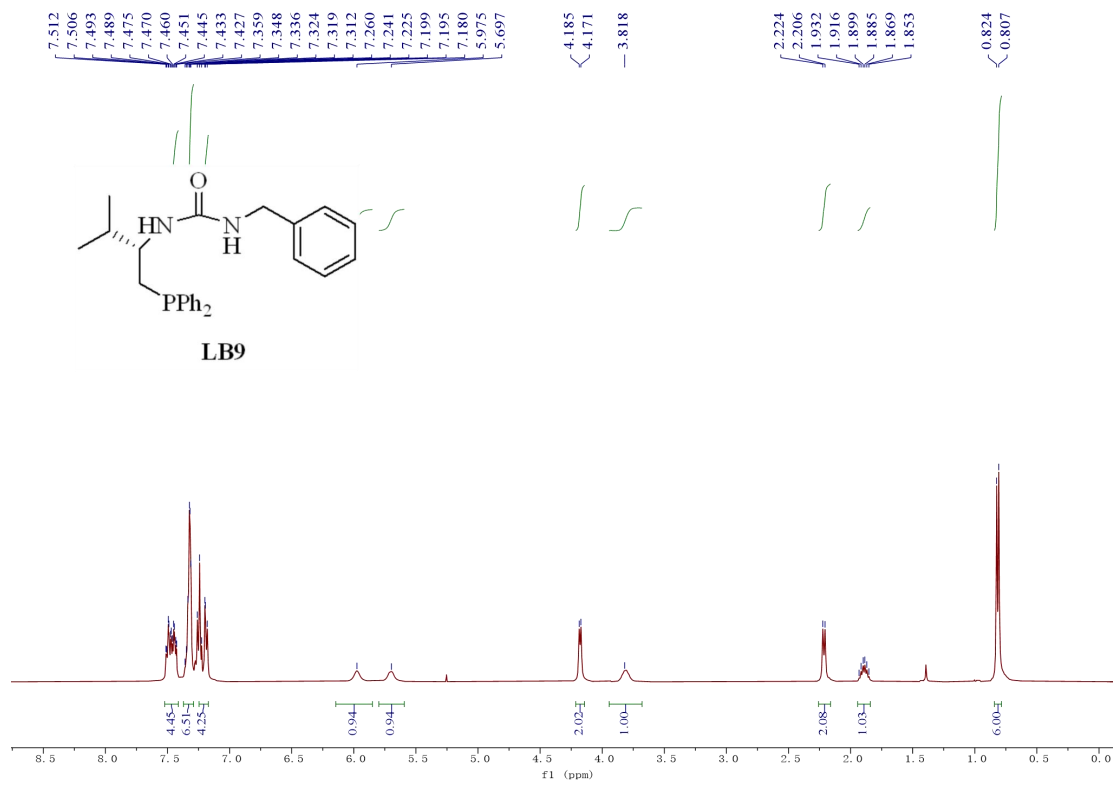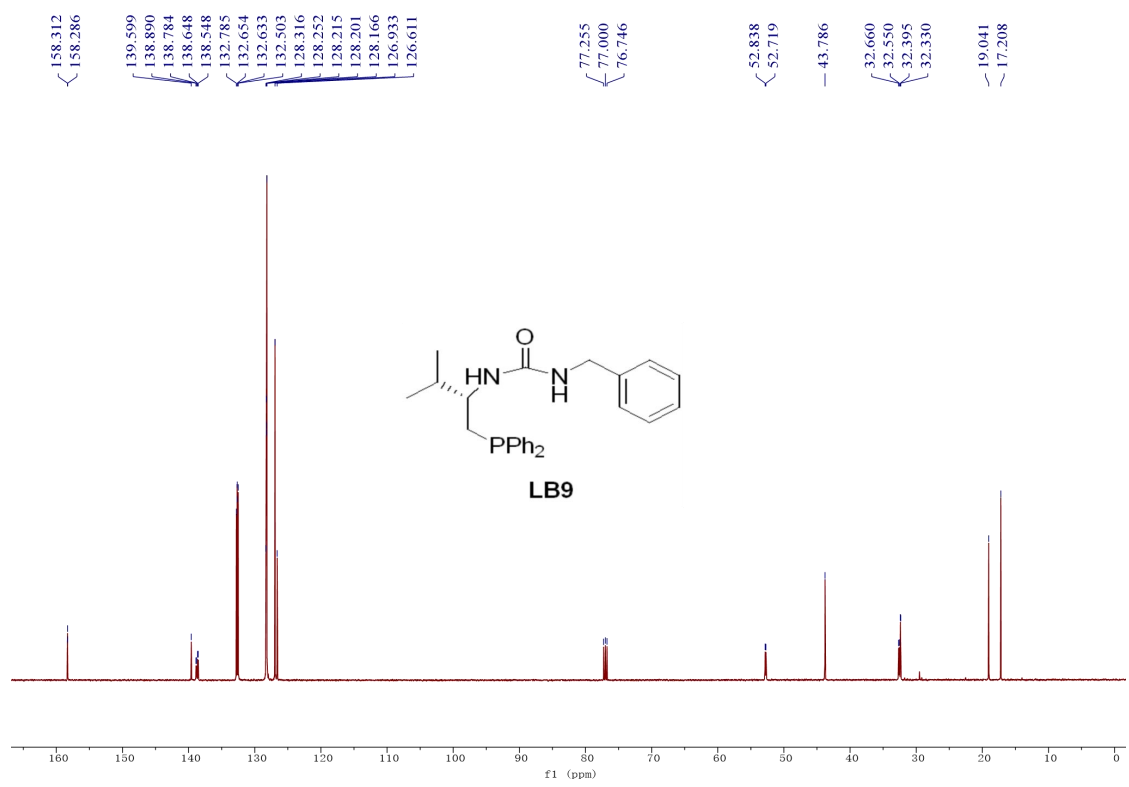

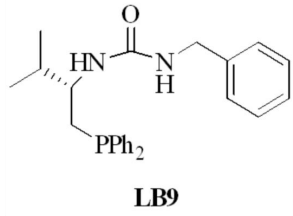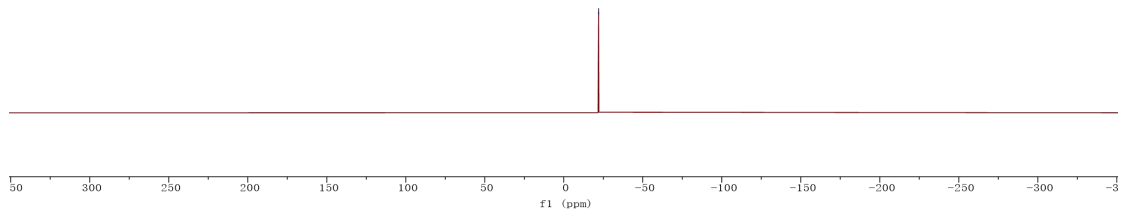

<sup>1</sup>H, <sup>13</sup>C and <sup>31</sup>P NMR spectra of compound **LB9**

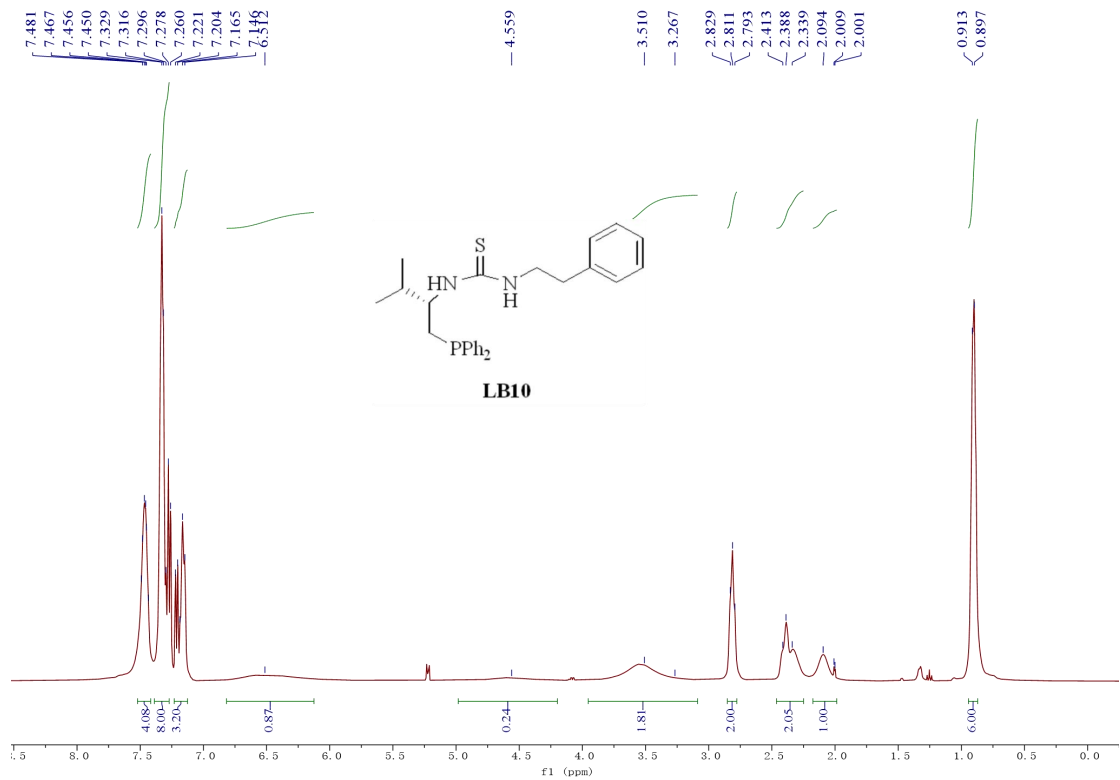

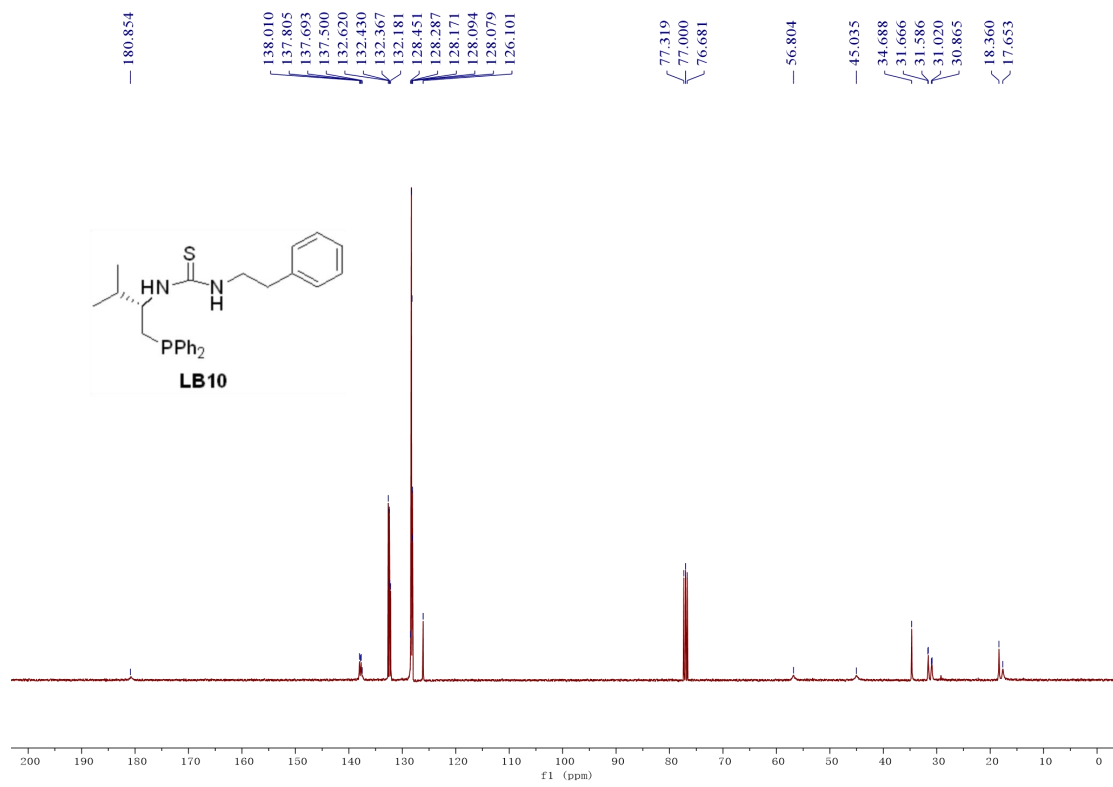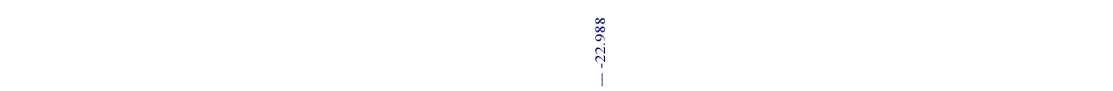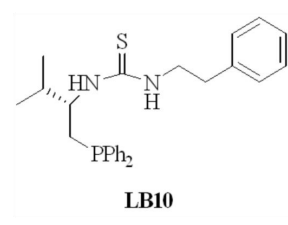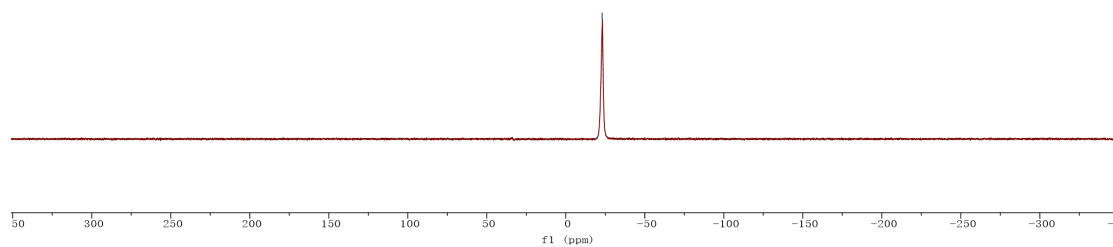

**<sup>1</sup>H, <sup>13</sup>C and <sup>31</sup>P NMR spectra of compound **LB10****

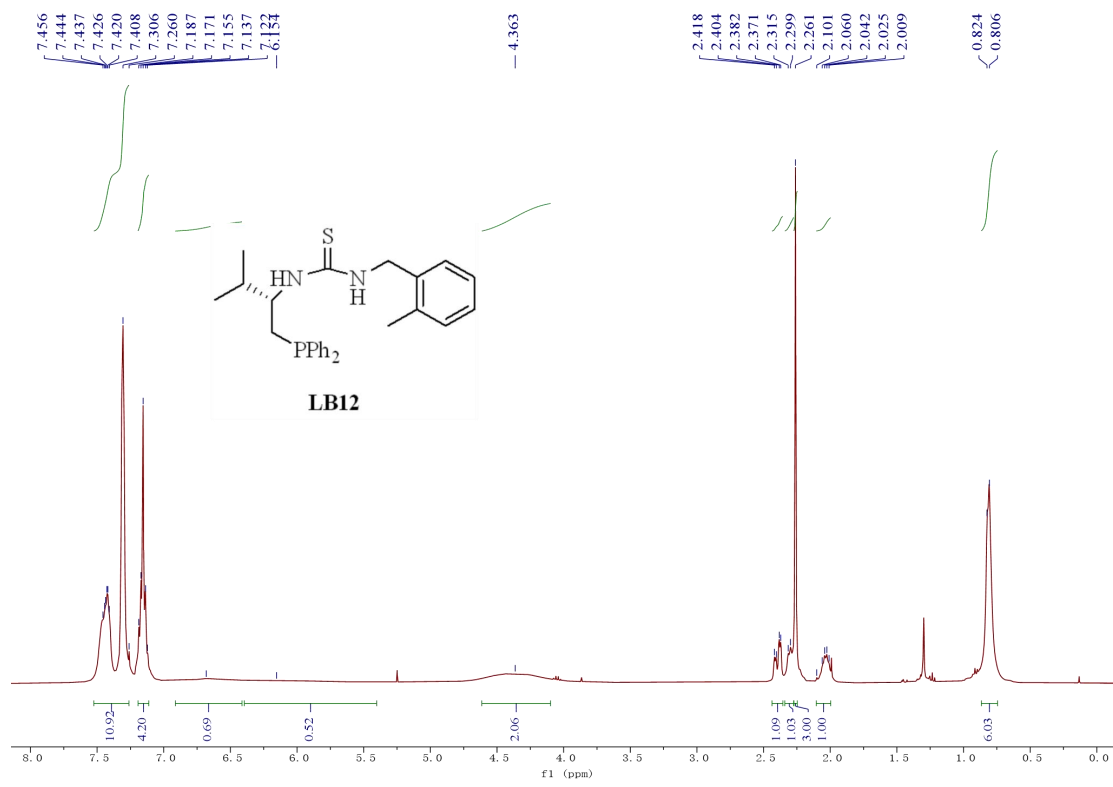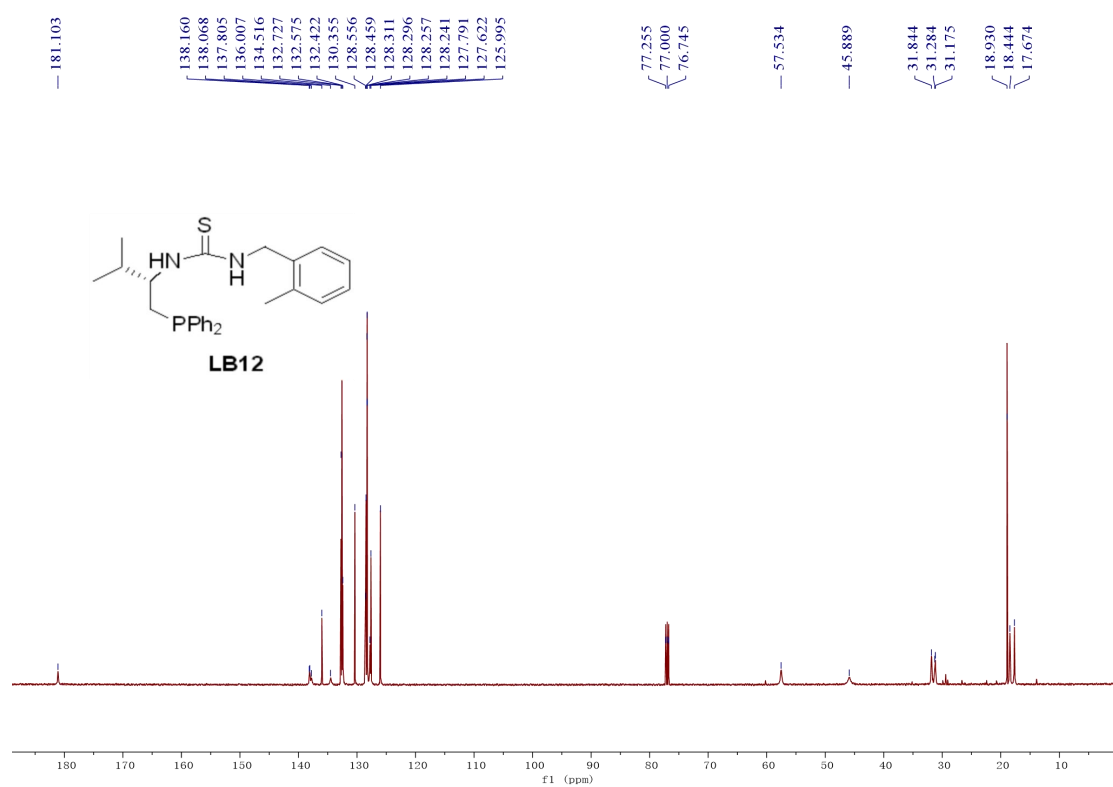

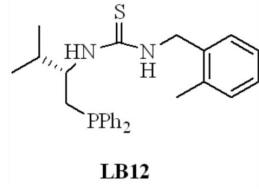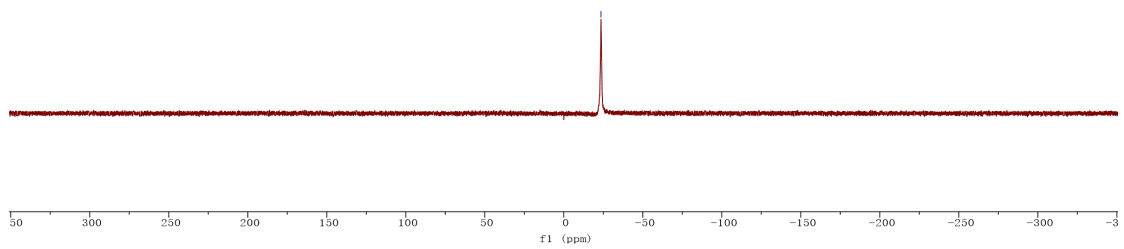

<sup>1</sup>H, <sup>13</sup>C and <sup>31</sup>P NMR spectra of compound LB12

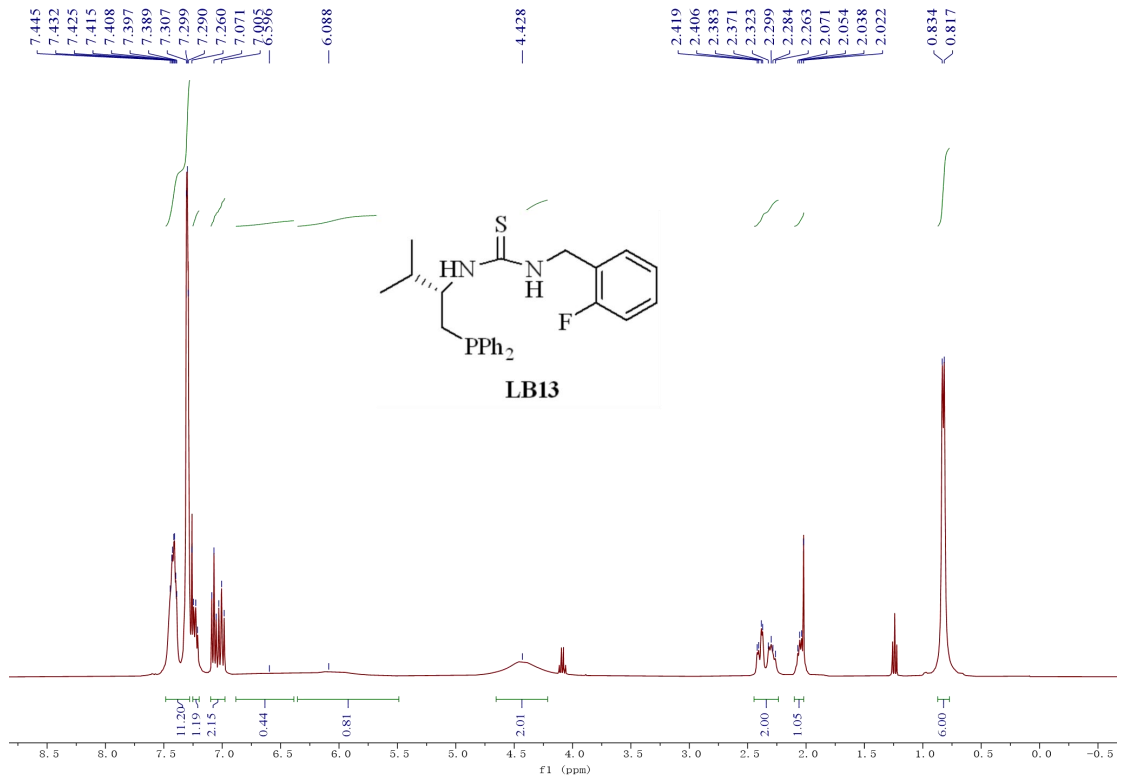

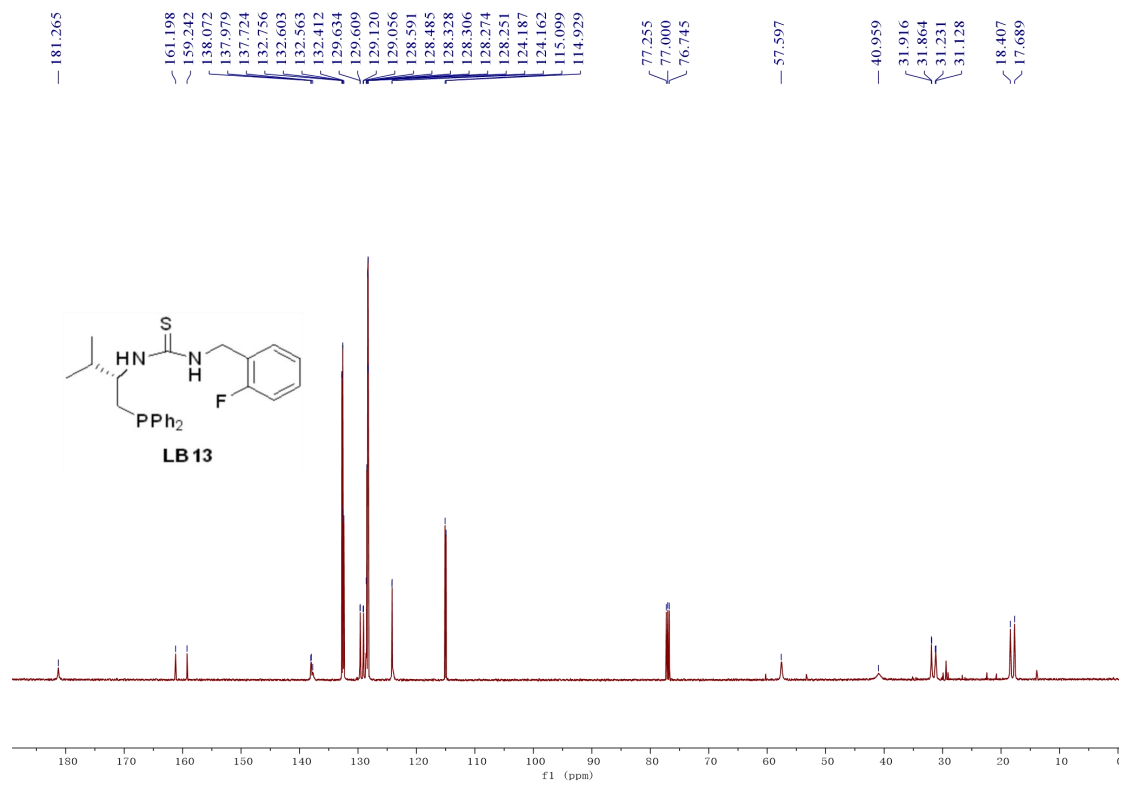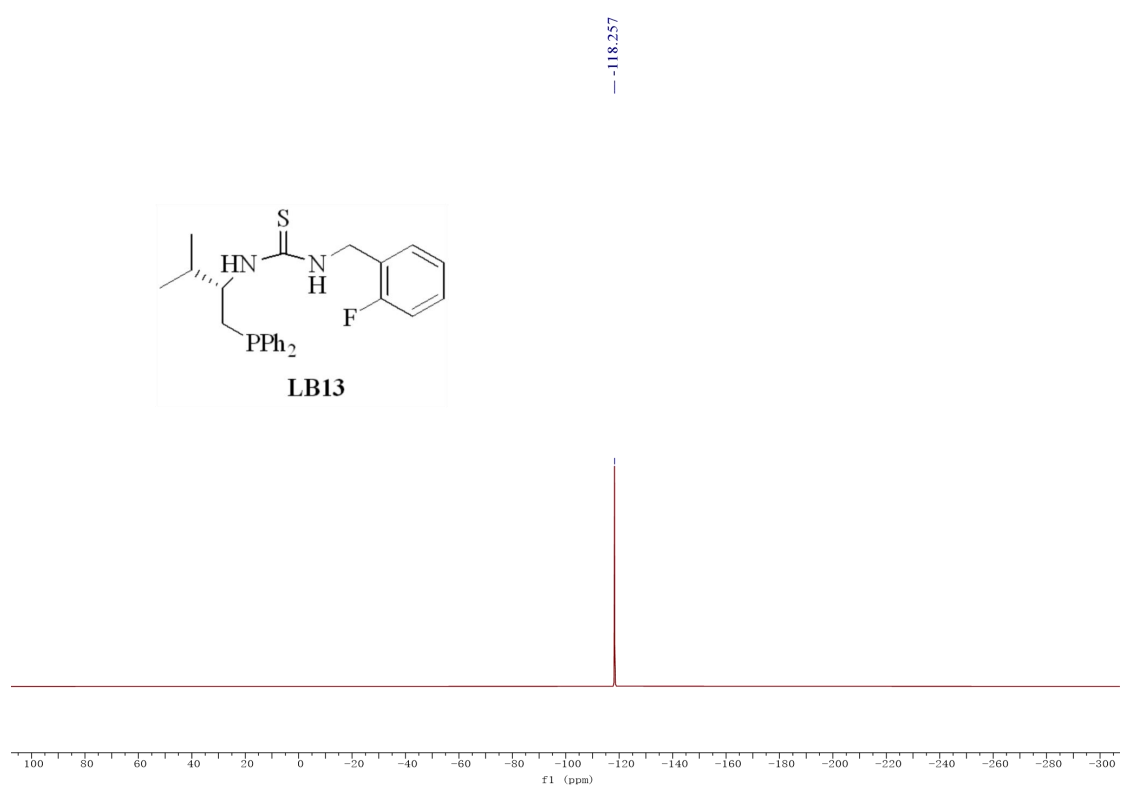



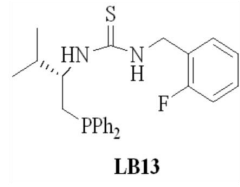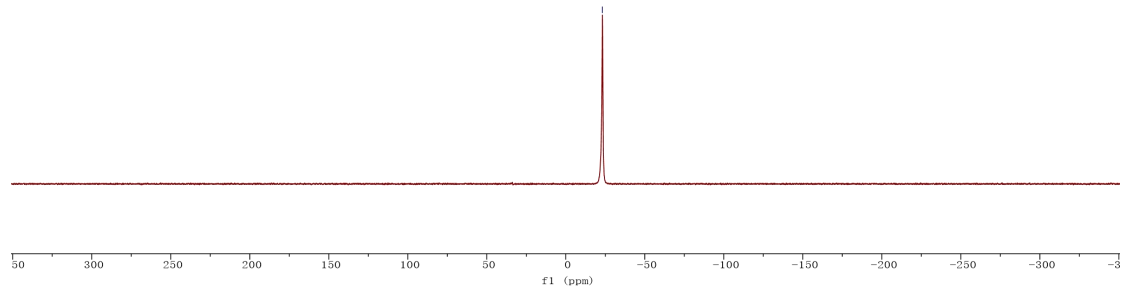

<sup>1</sup>H, <sup>13</sup>C, <sup>19</sup>F and <sup>31</sup>P NMR spectra of compound **LB13**

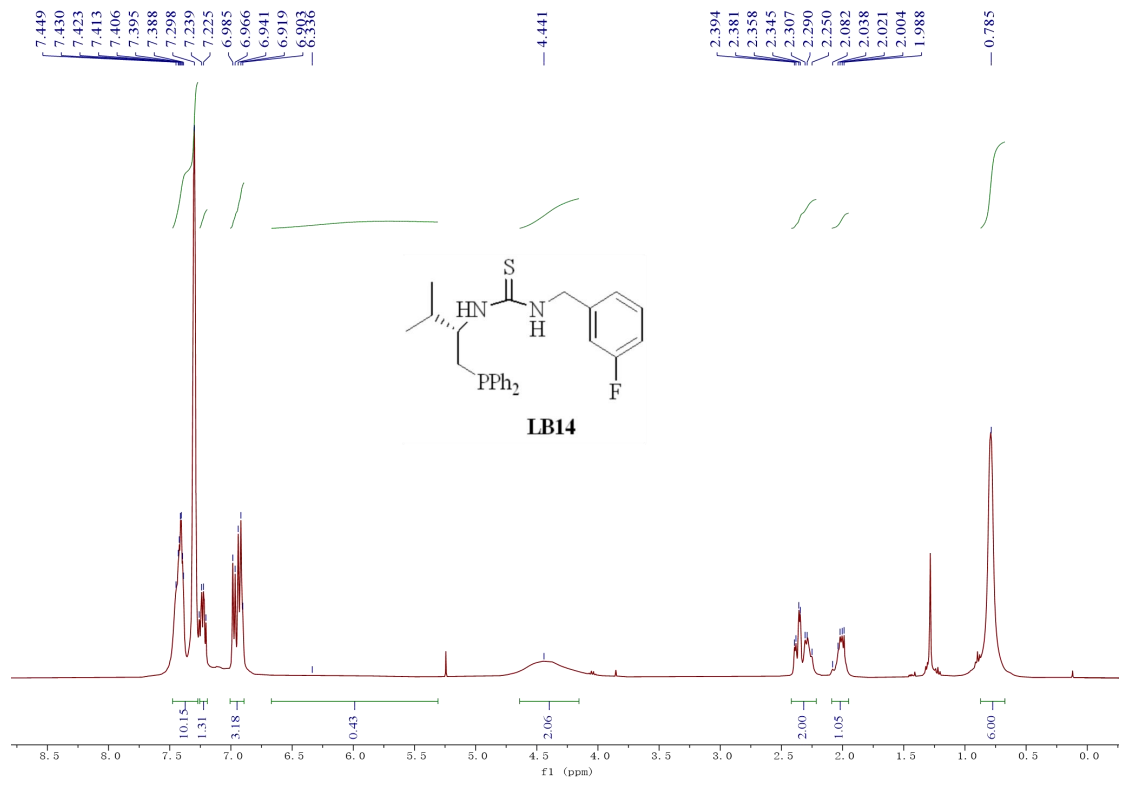

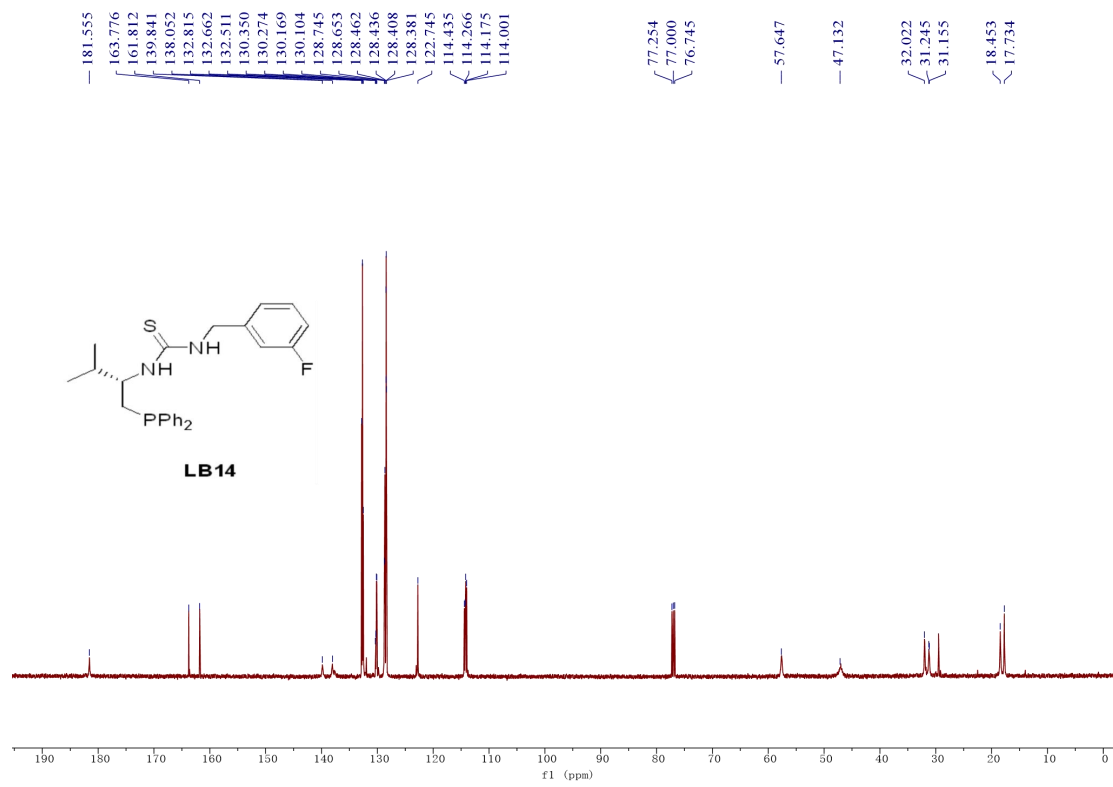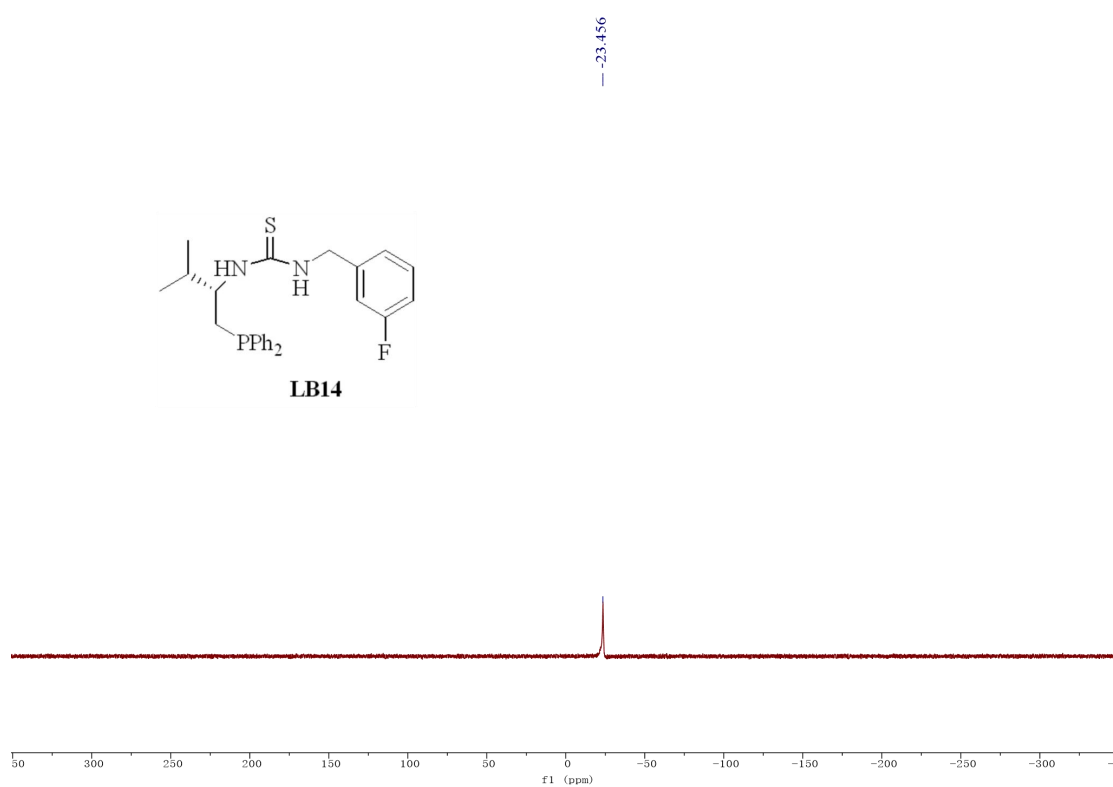

-112.007

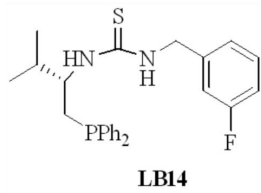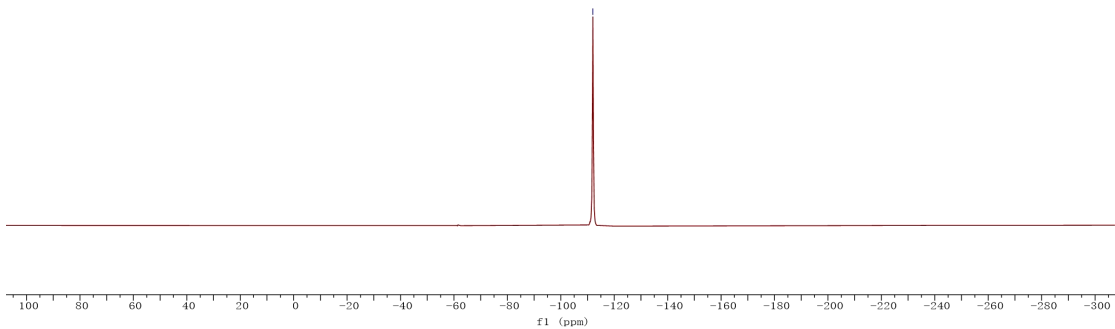

$^1\text{H}$ ,  $^{13}\text{C}$ ,  $^{31}\text{P}$  and  $^{19}\text{F}$  NMR spectra of compound **LB14**

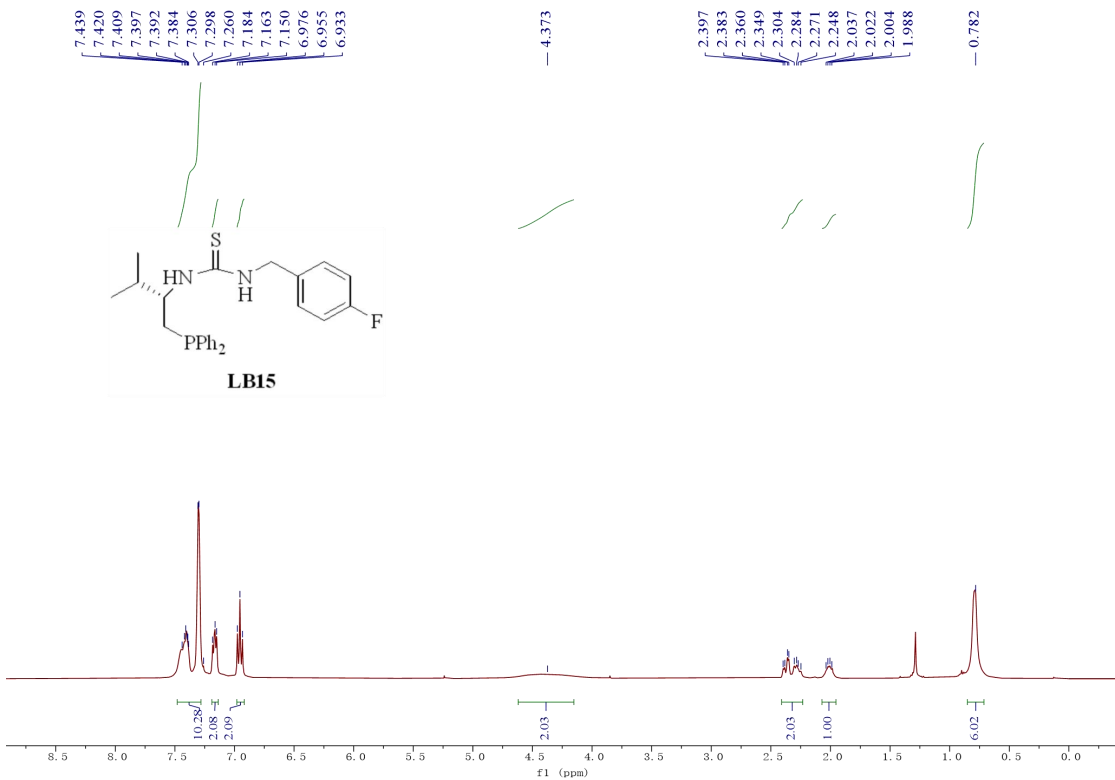

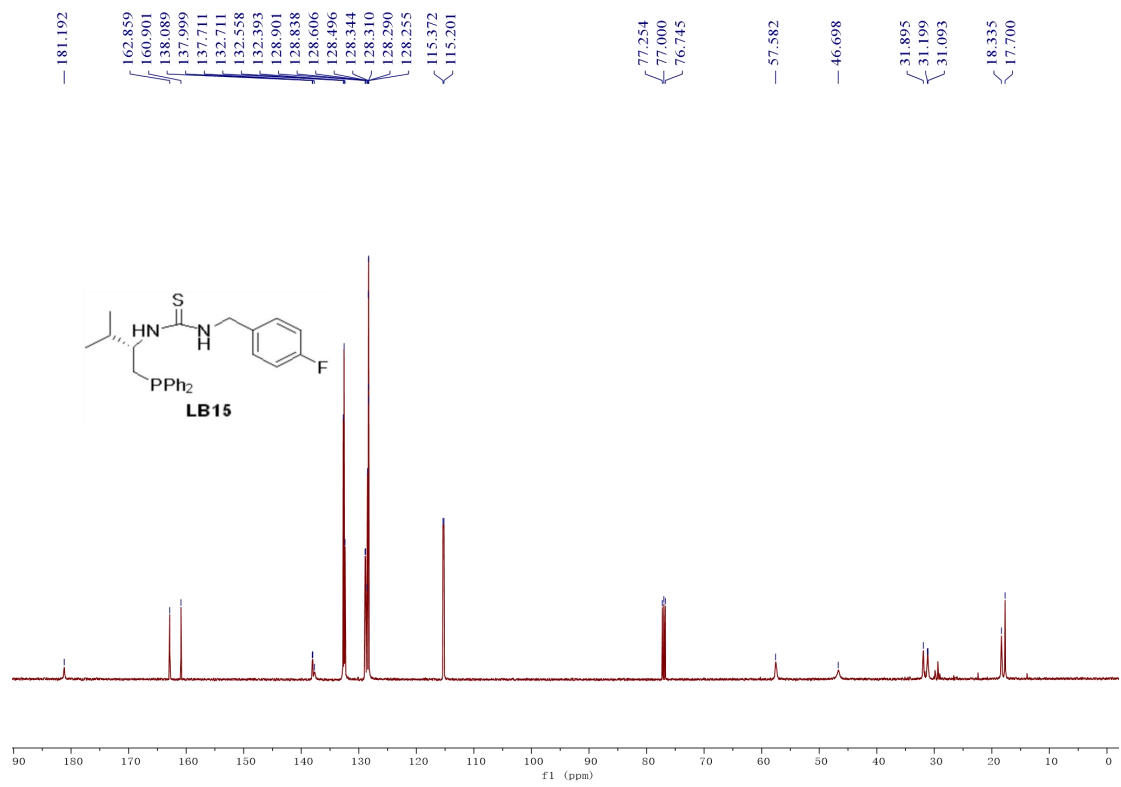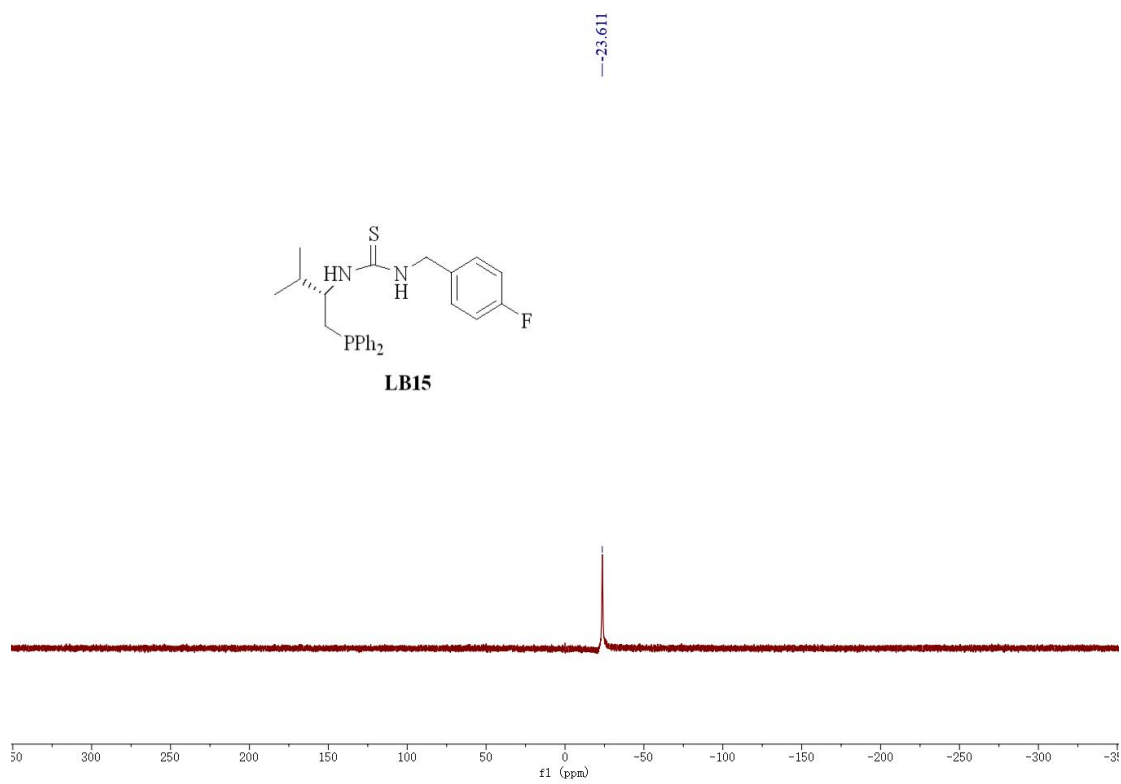

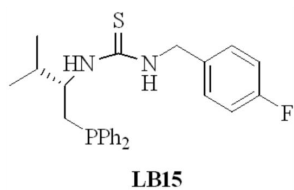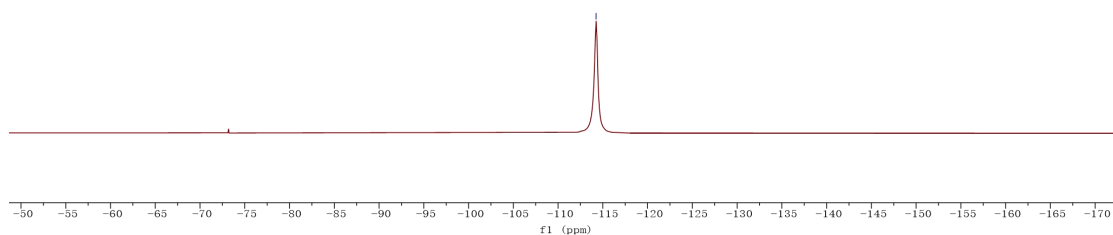

<sup>1</sup>H, <sup>13</sup>C, <sup>31</sup>P and <sup>19</sup>F NMR spectra of compound **LB15**

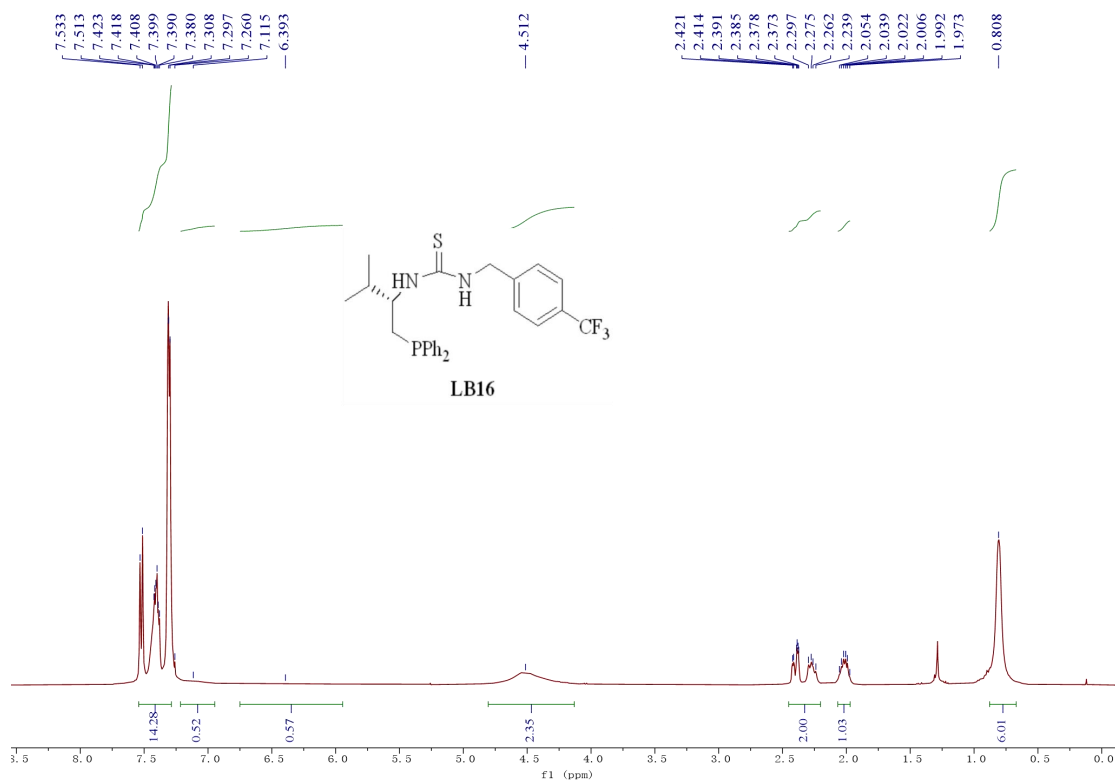

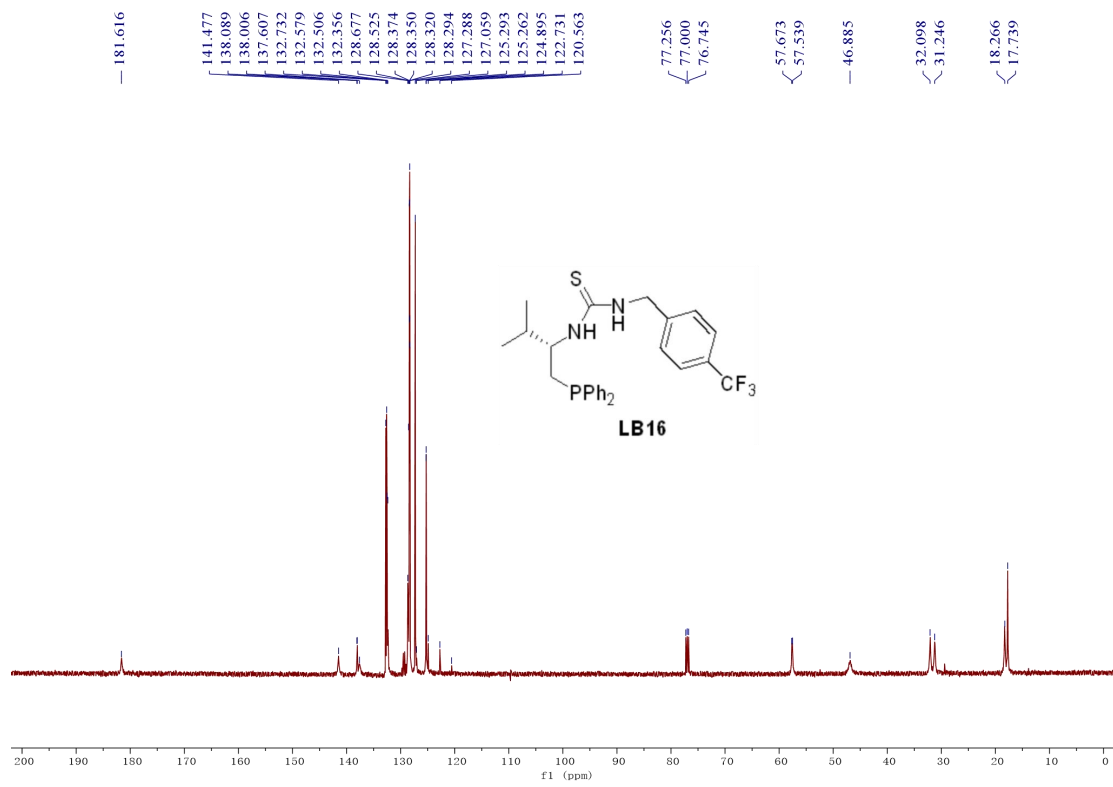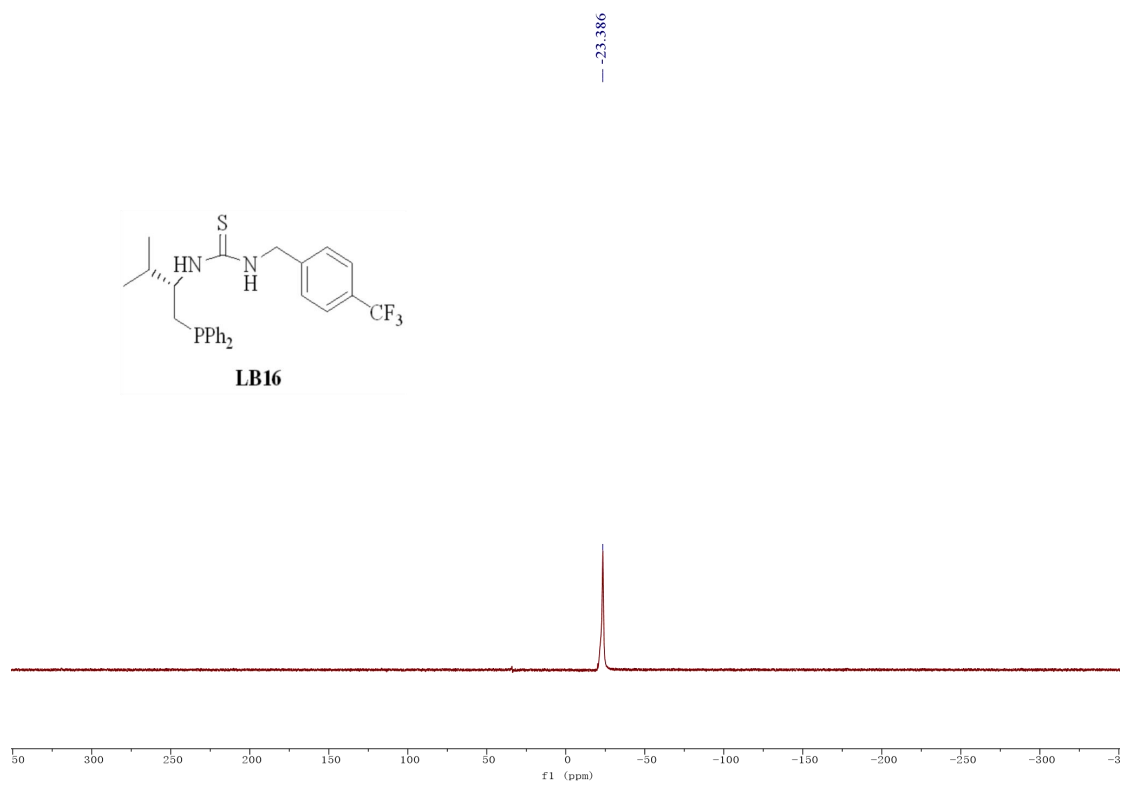

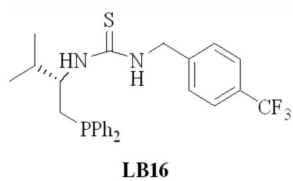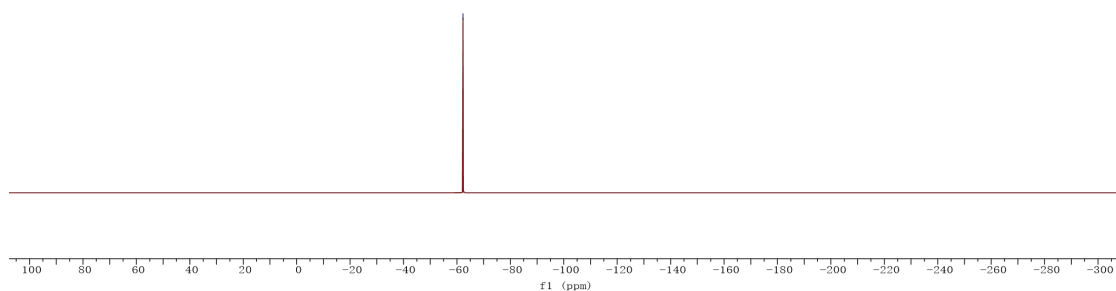

<sup>1</sup>H, <sup>13</sup>C, <sup>31</sup>P and <sup>19</sup>F NMR spectra of compound **LB16**

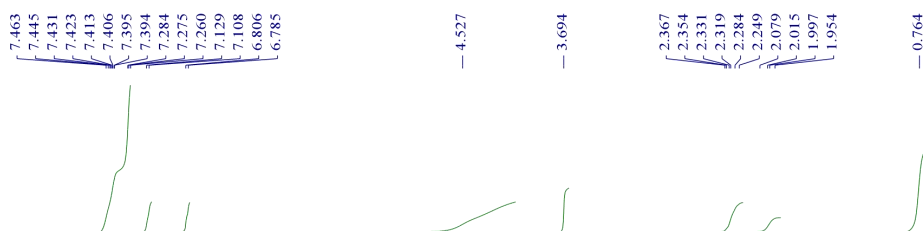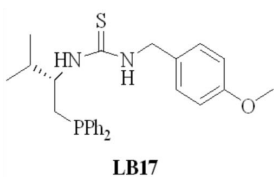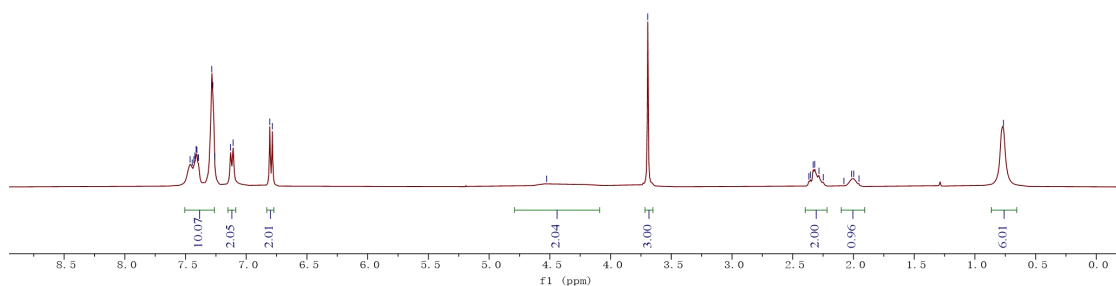

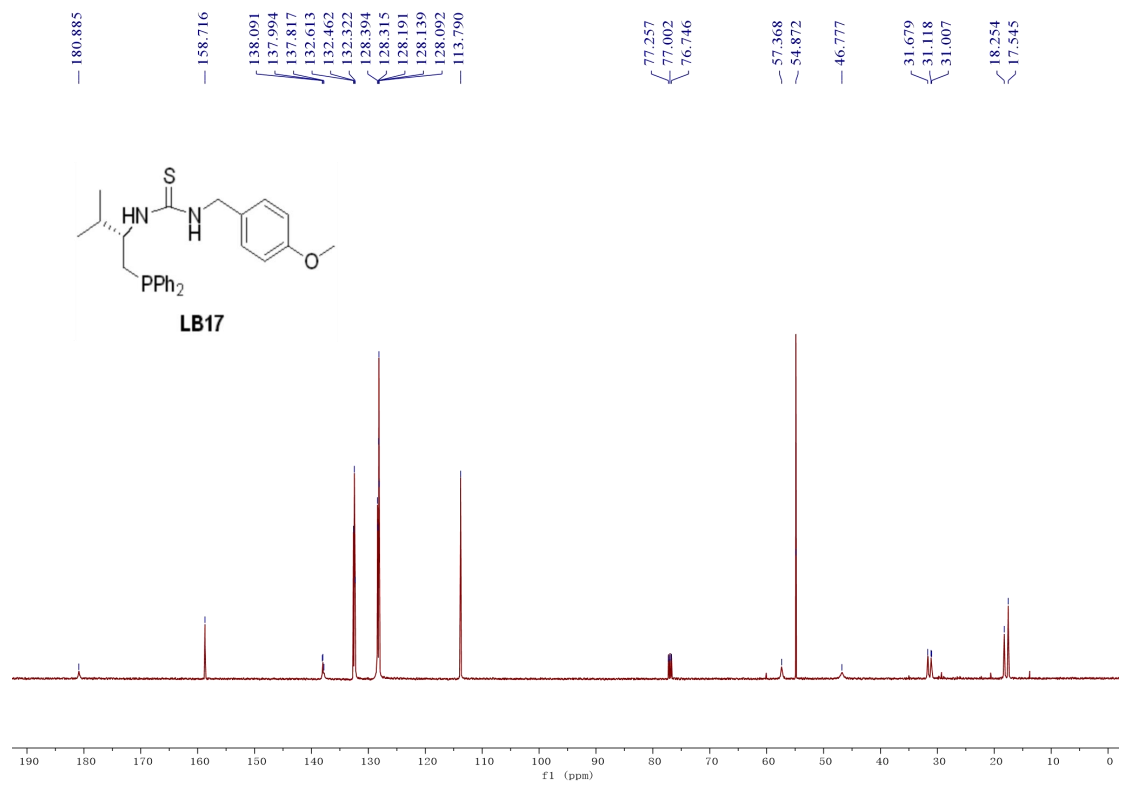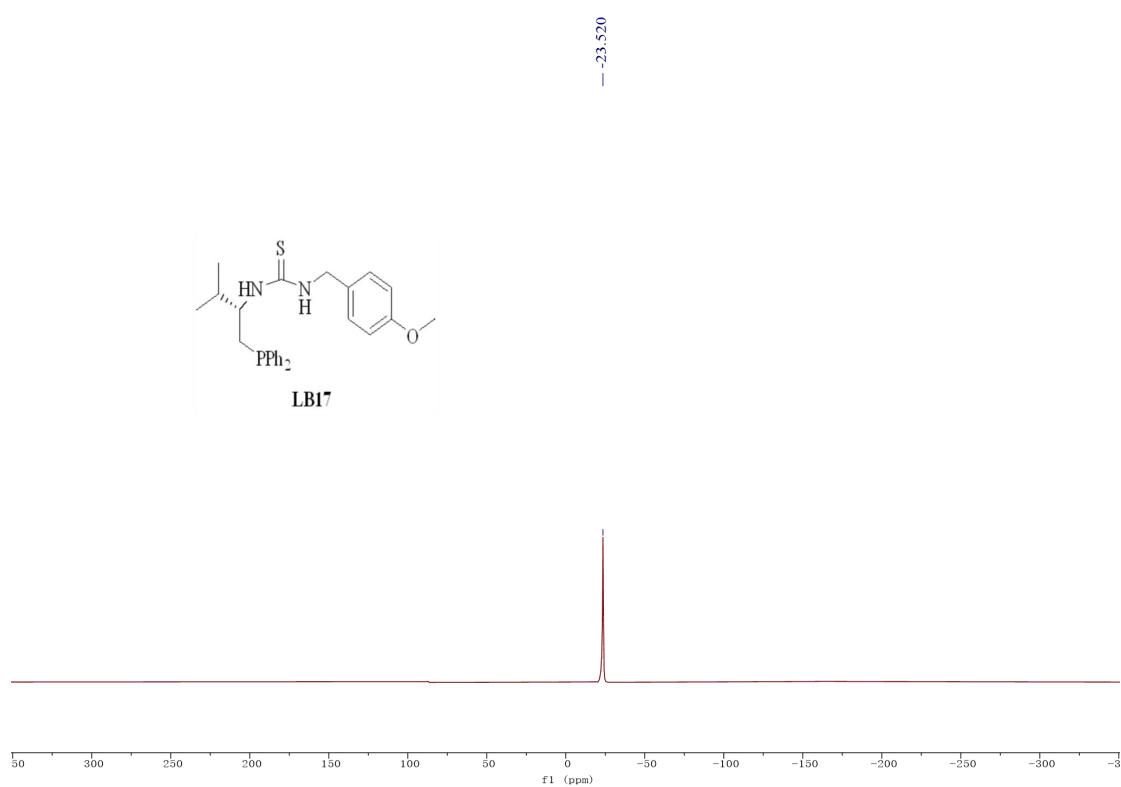

$^1\text{H}$ ,  $^{13}\text{C}$  and  $^{31}\text{P}$  NMR spectra of compound **LB17**



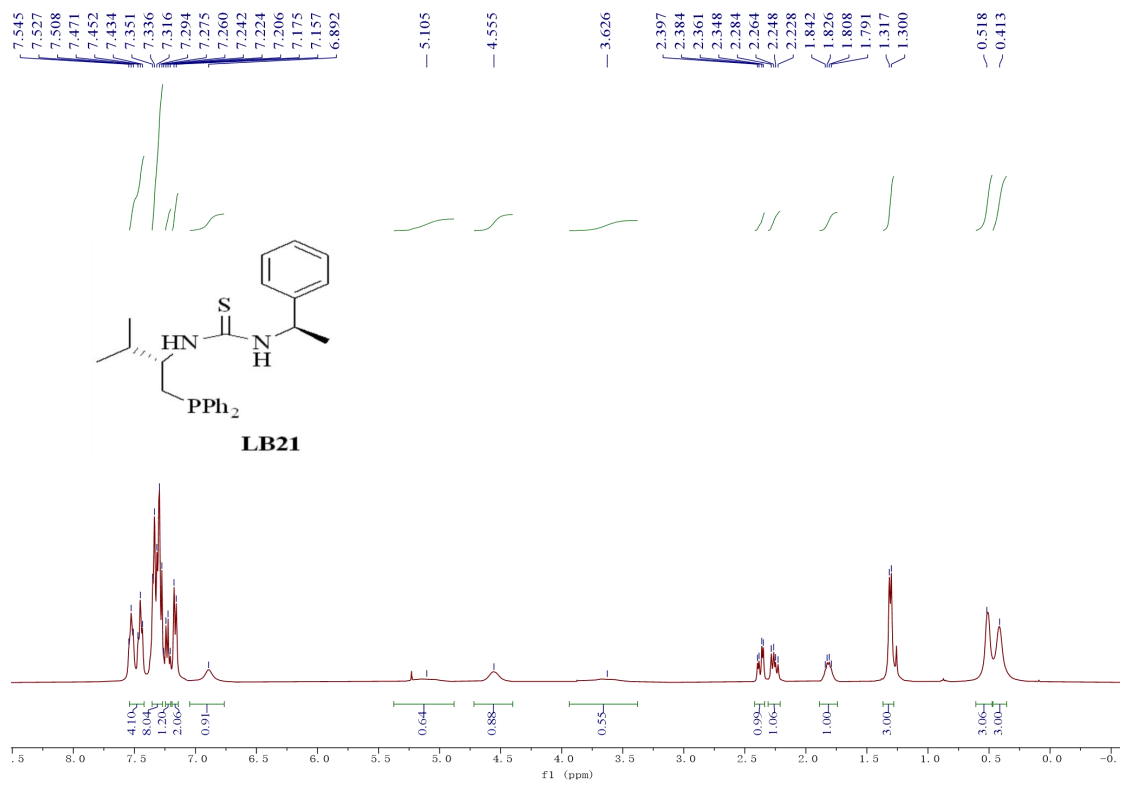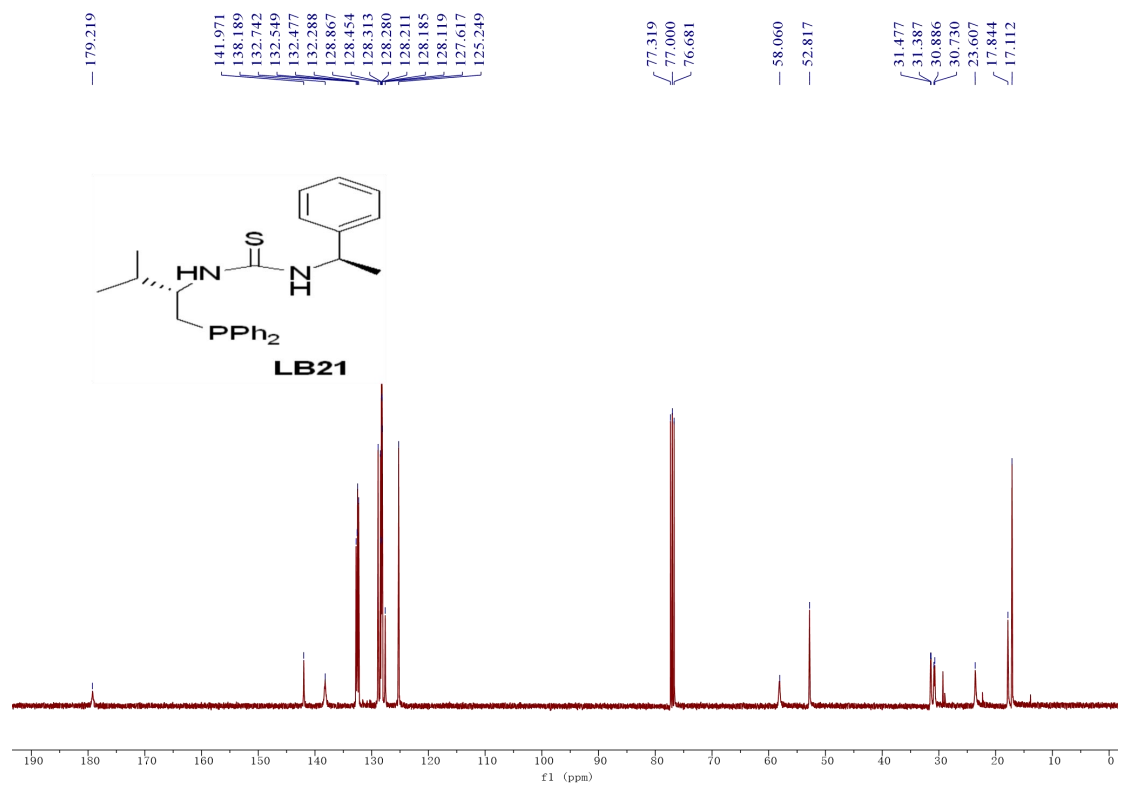

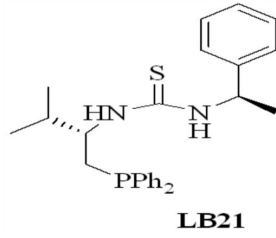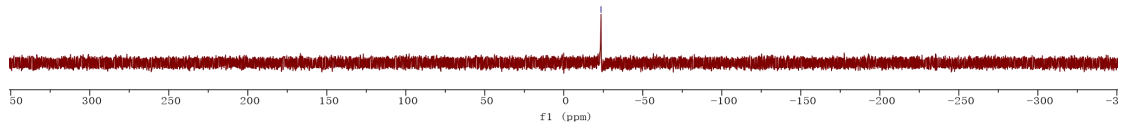

<sup>1</sup>H, <sup>13</sup>C and <sup>31</sup>P NMR spectra of compound **LB21**

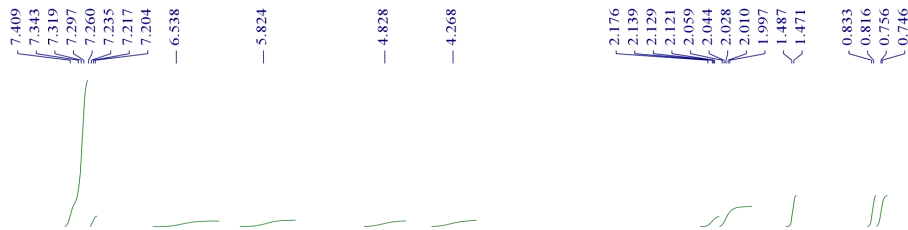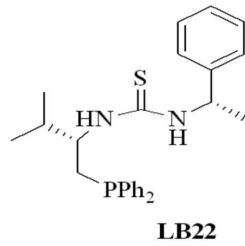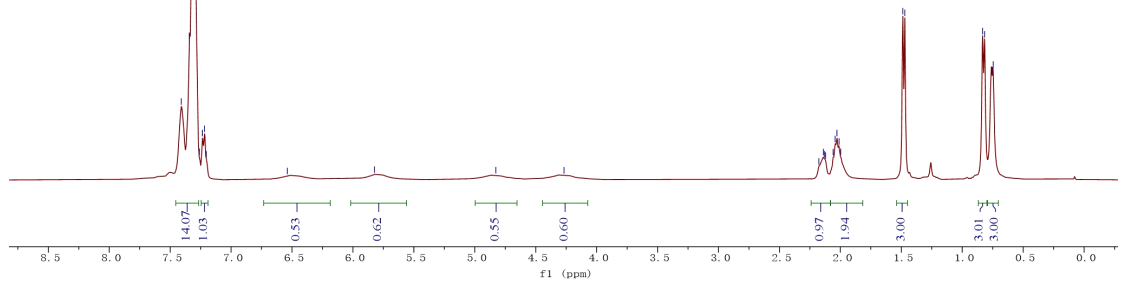

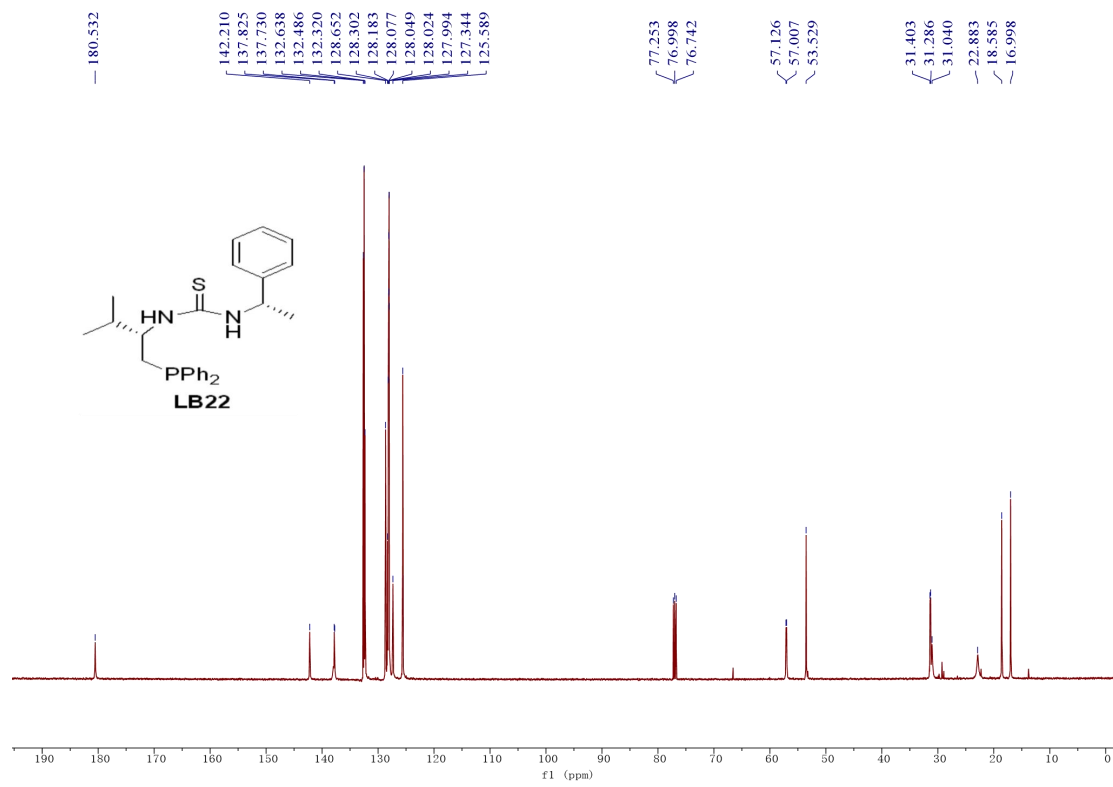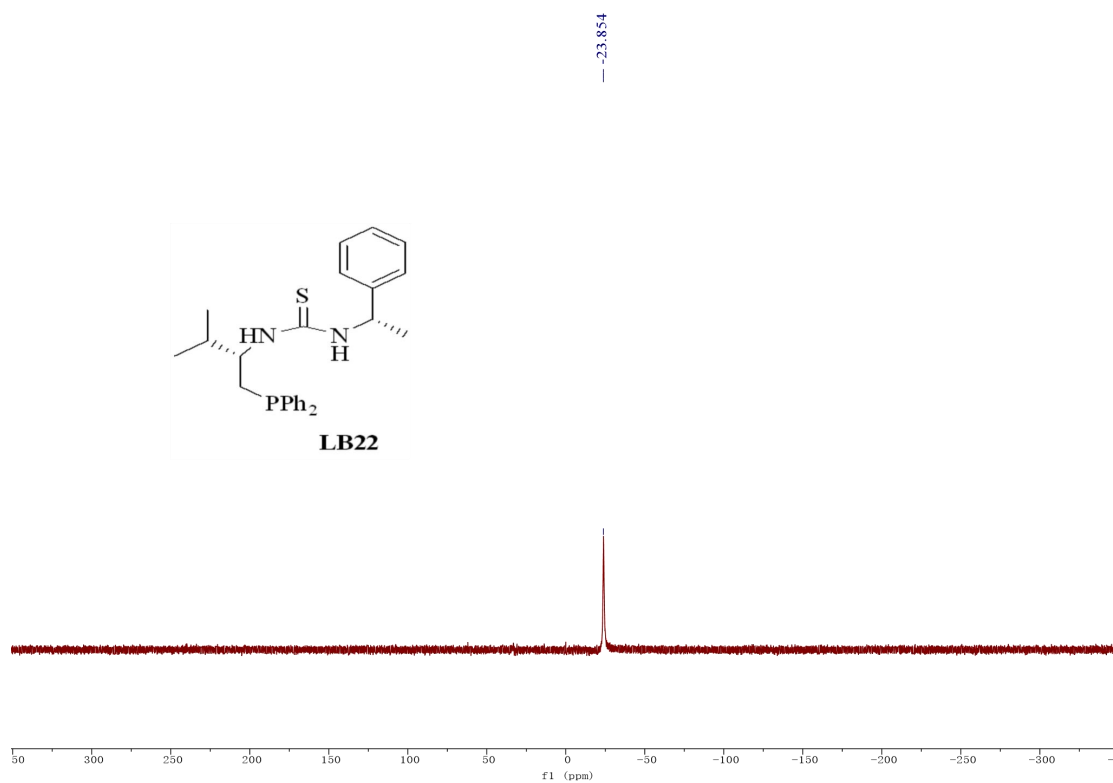

$^1\text{H}$ ,  $^{13}\text{C}$  and  $^{31}\text{P}$  NMR spectra of compound **LB22**

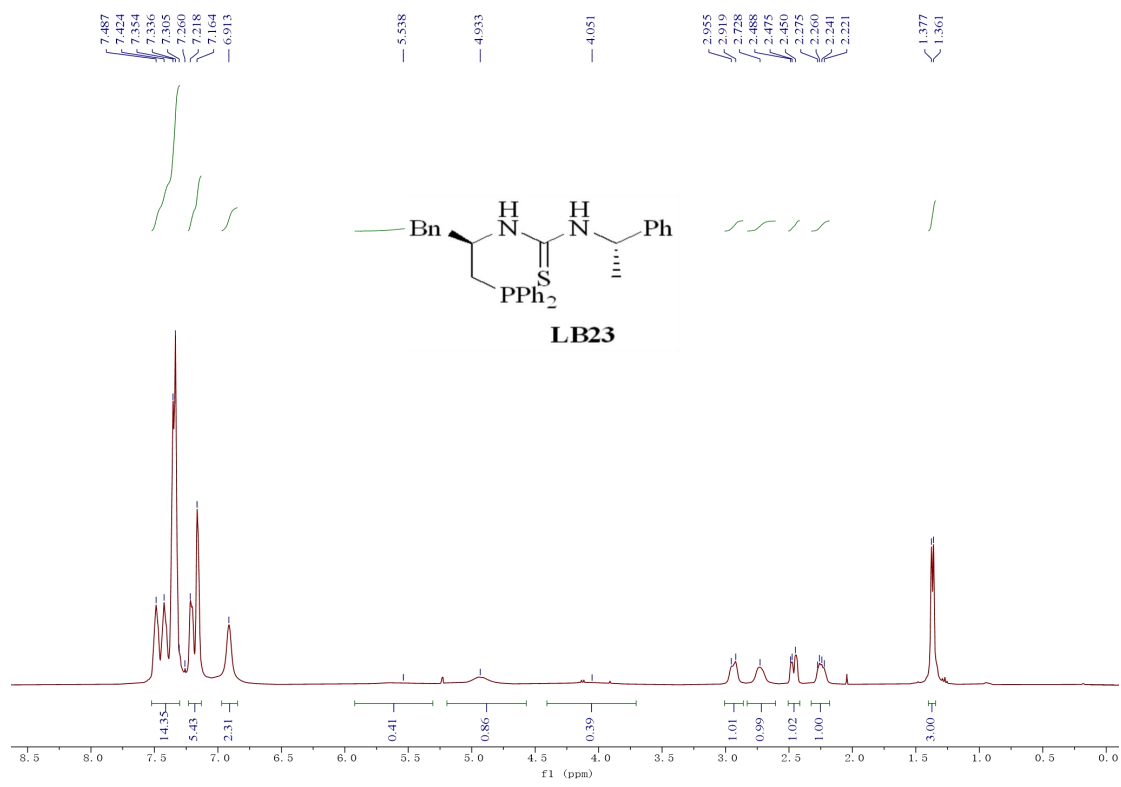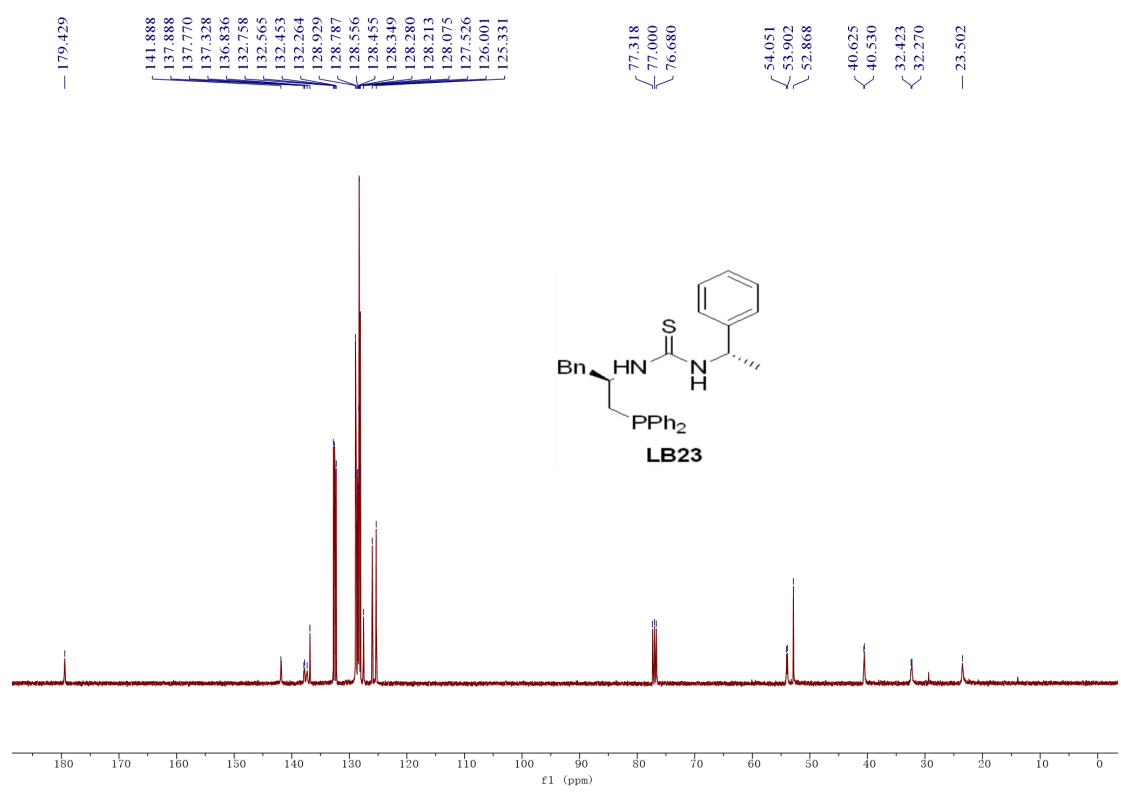

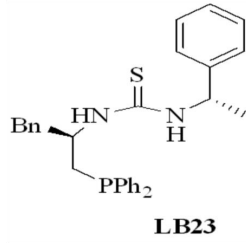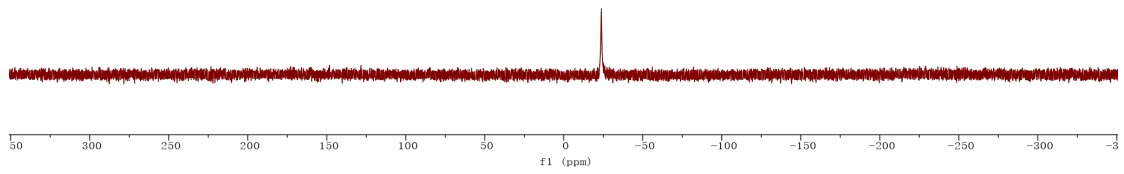

<sup>1</sup>H, <sup>13</sup>C and <sup>31</sup>P NMR spectra of compound **LB23**

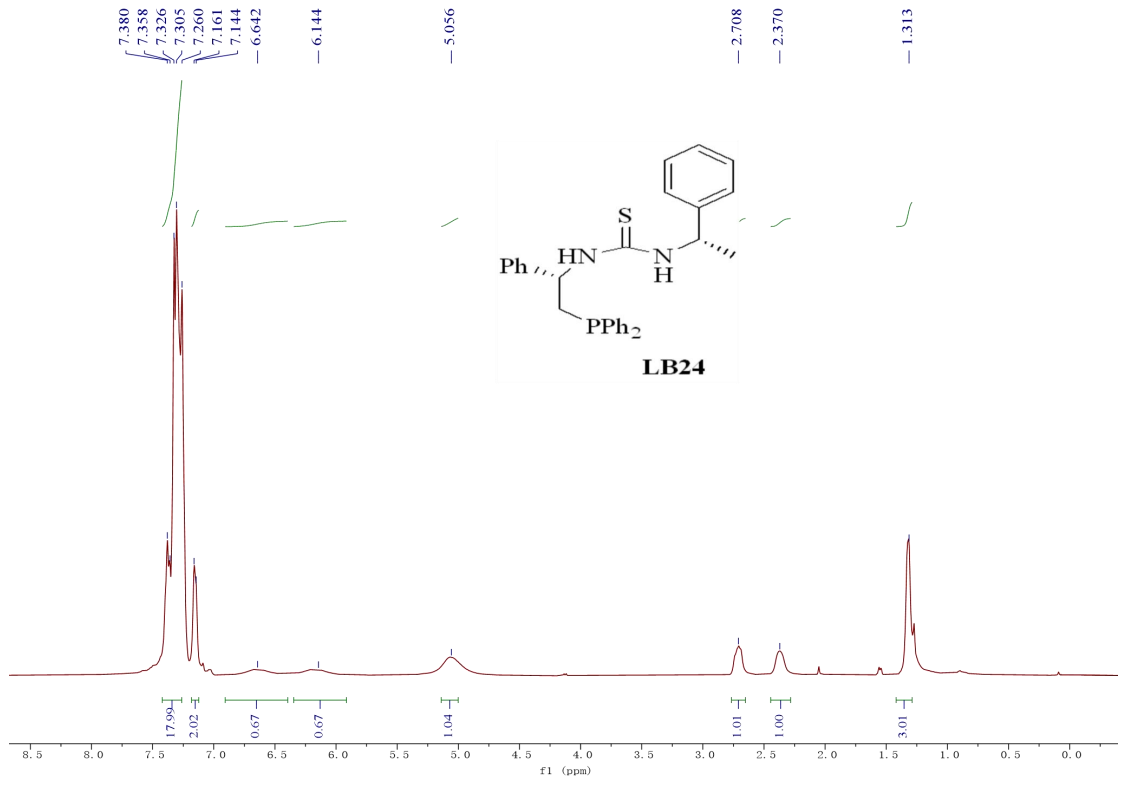

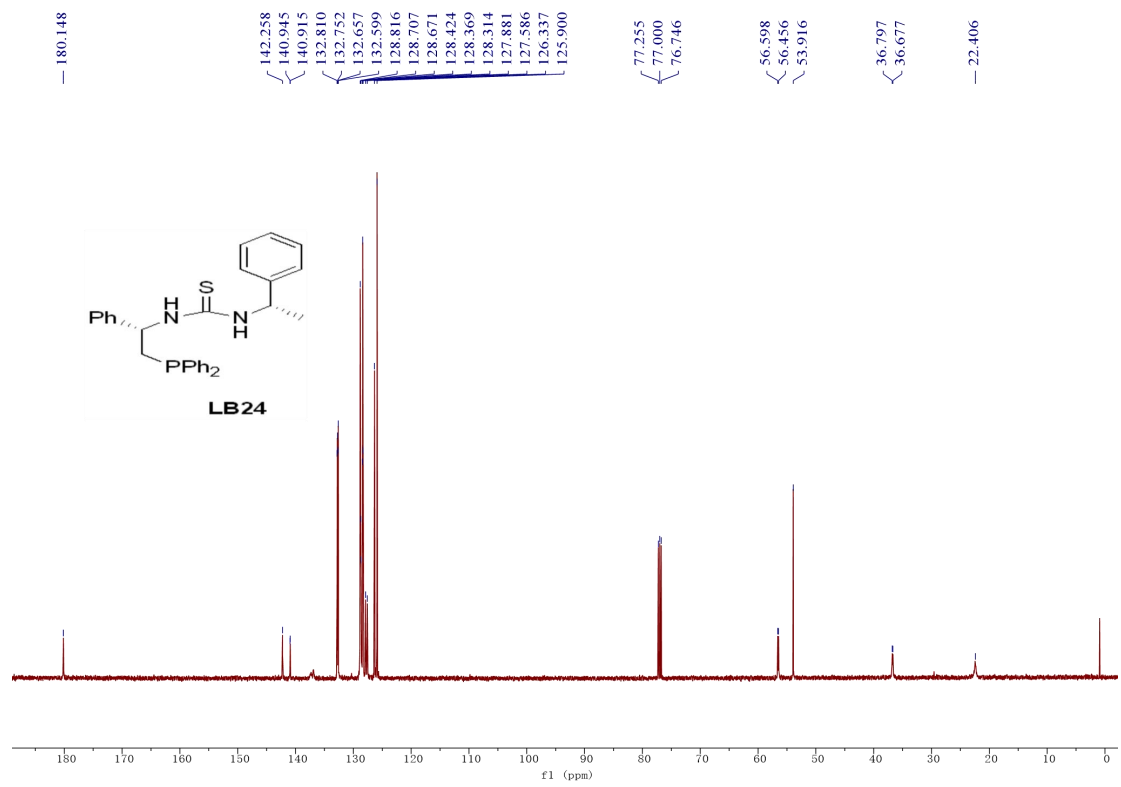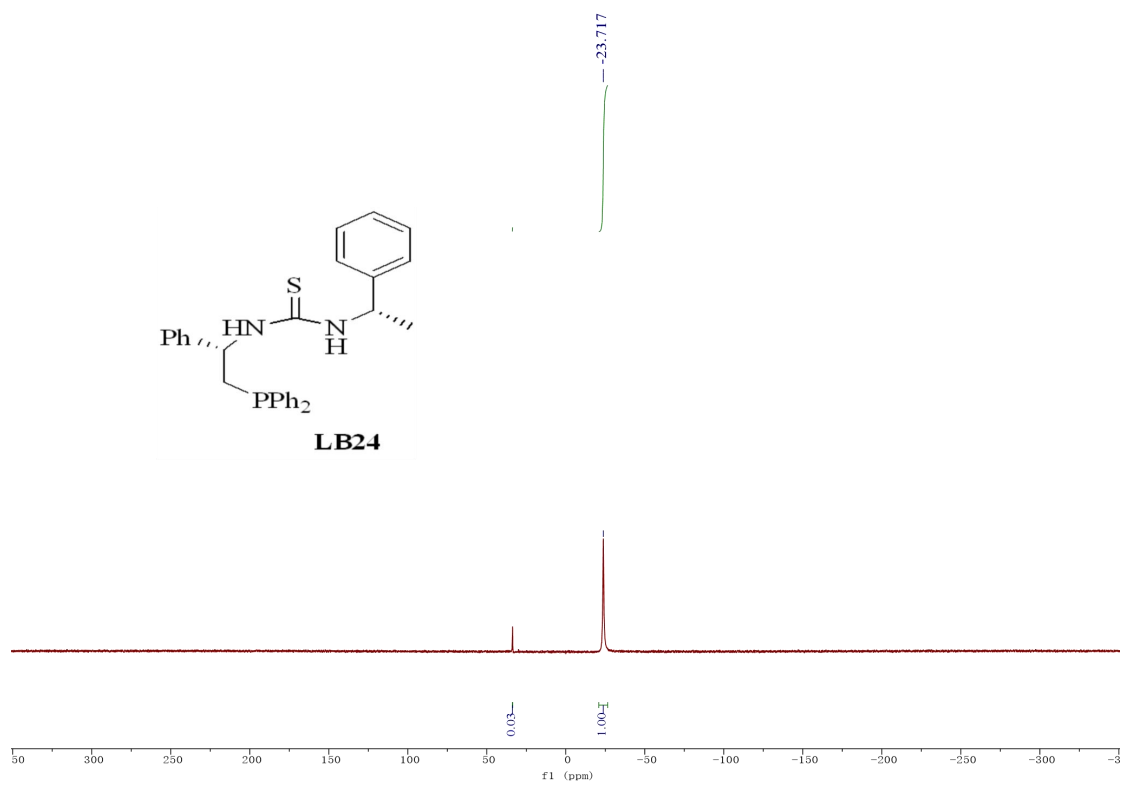

$^1\text{H}$ ,  $^{13}\text{C}$  and  $^{31}\text{P}$  NMR spectra of compound **LB24**

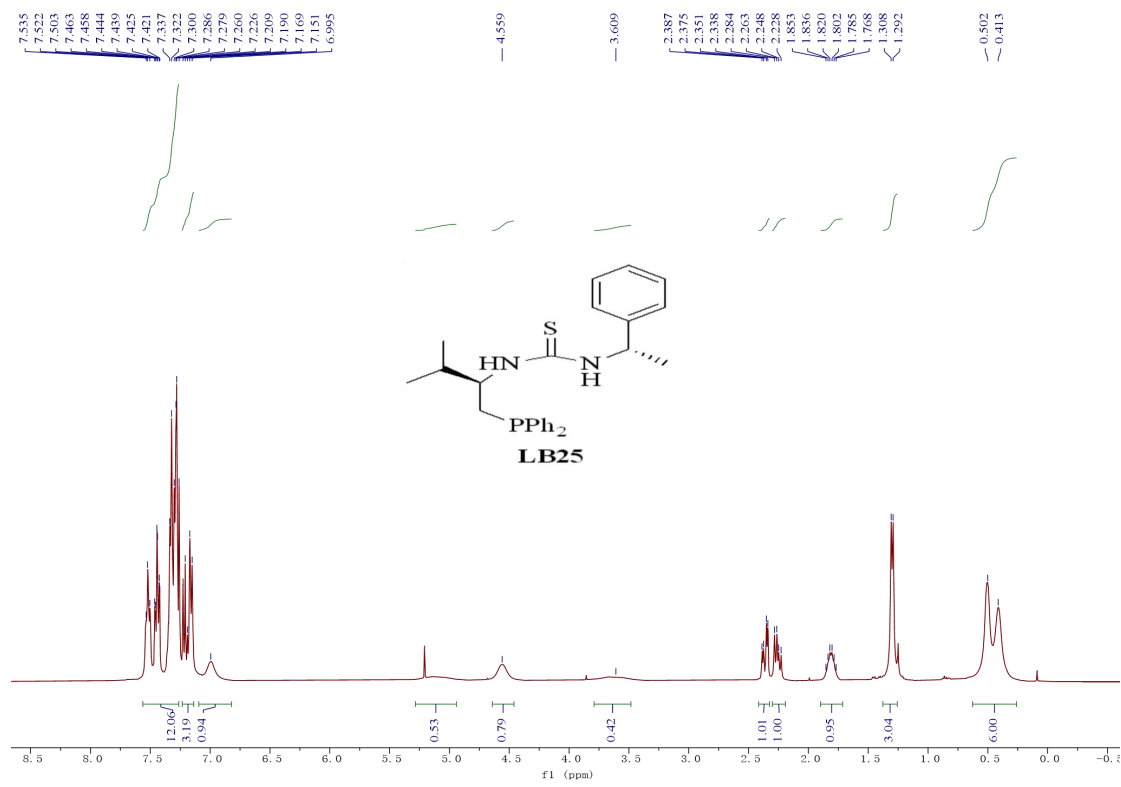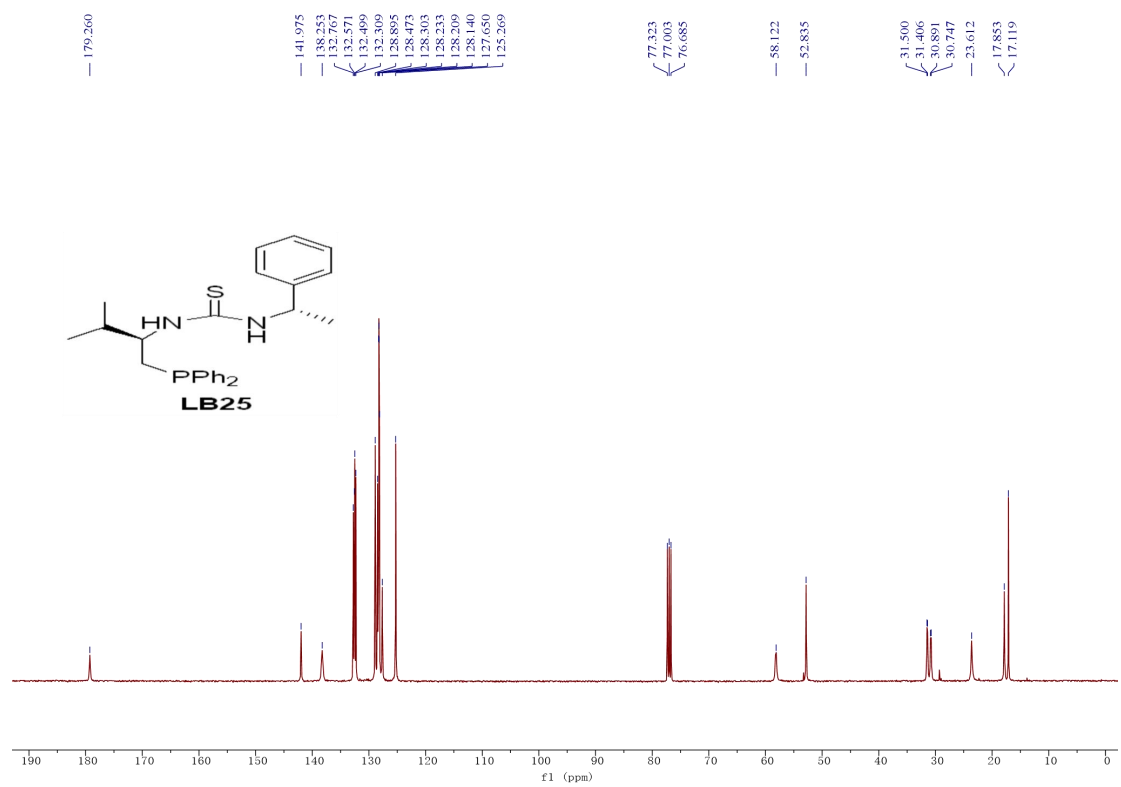

— 23.538

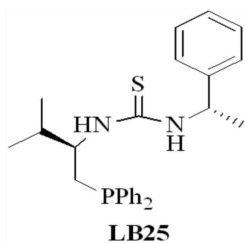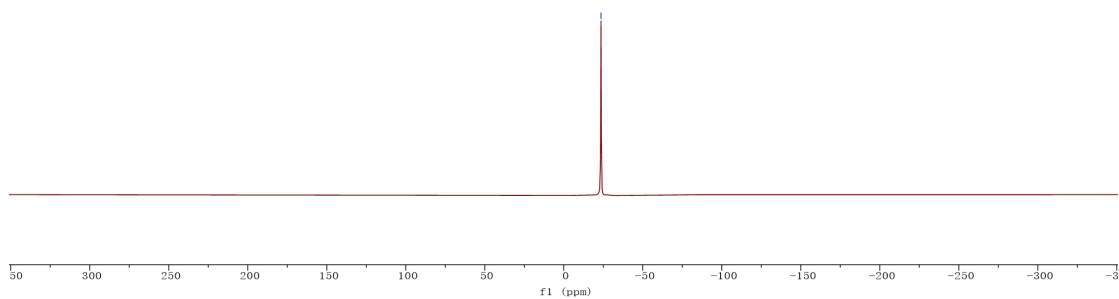

<sup>1</sup>H, <sup>13</sup>C and <sup>31</sup>P NMR spectra of compound **LB25**

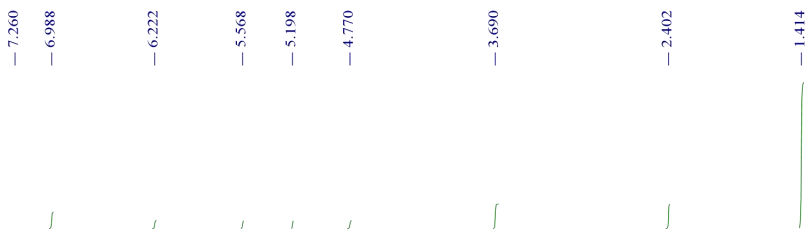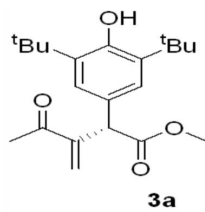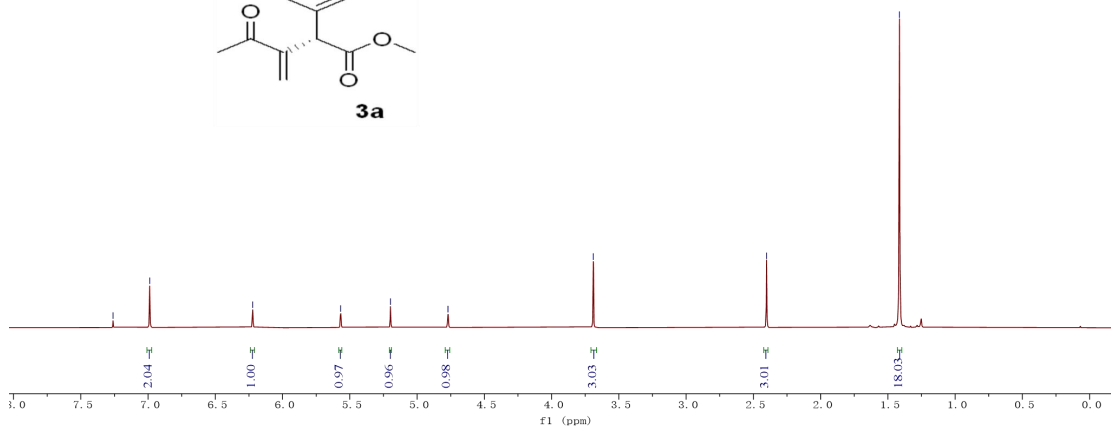



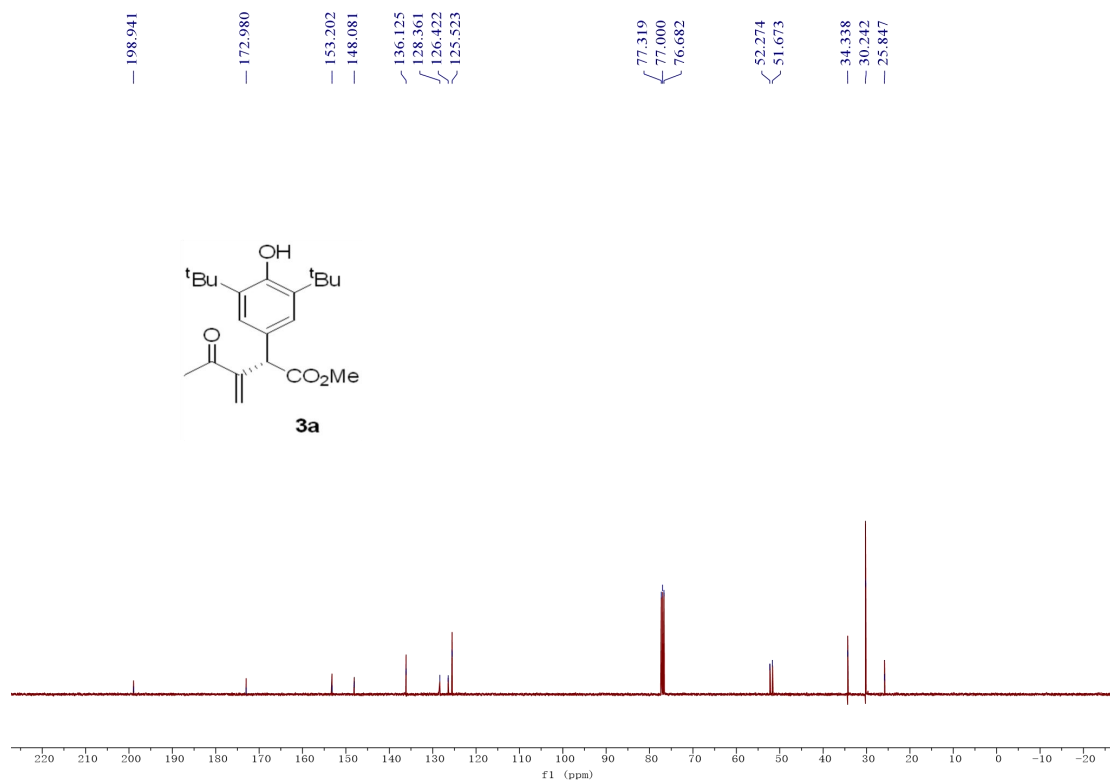

<sup>1</sup>H and <sup>13</sup>C NMR spectra of compound **3a**

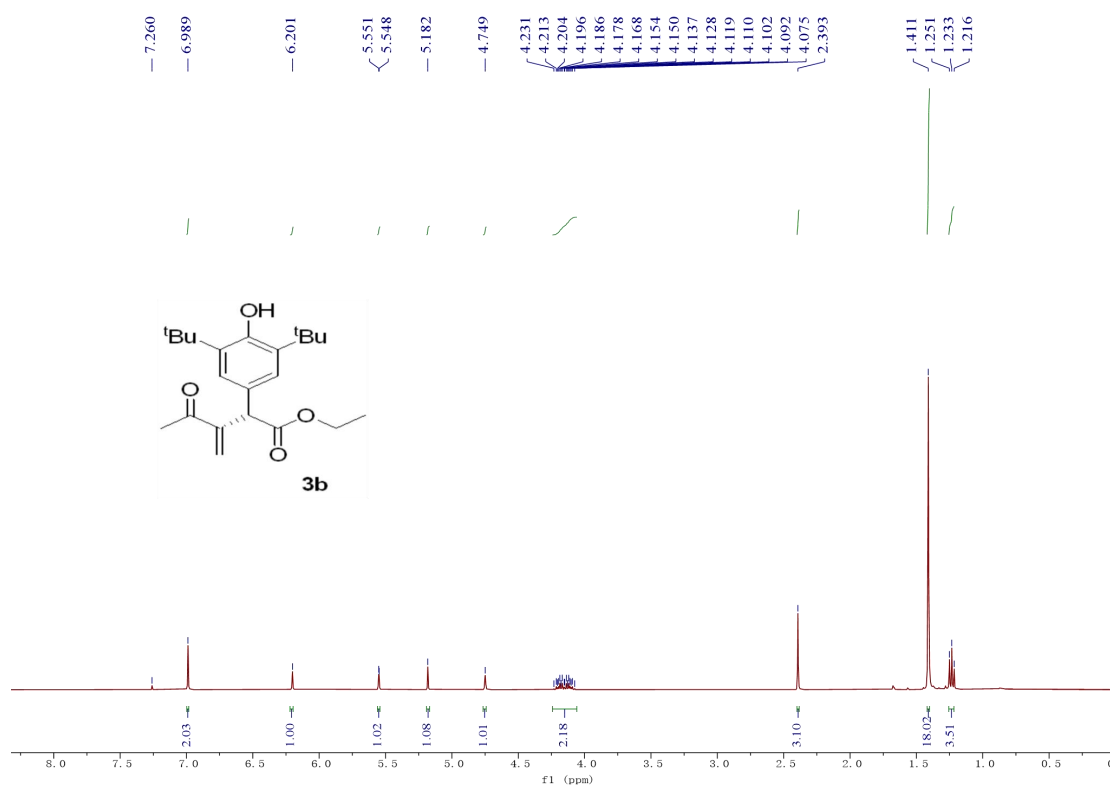

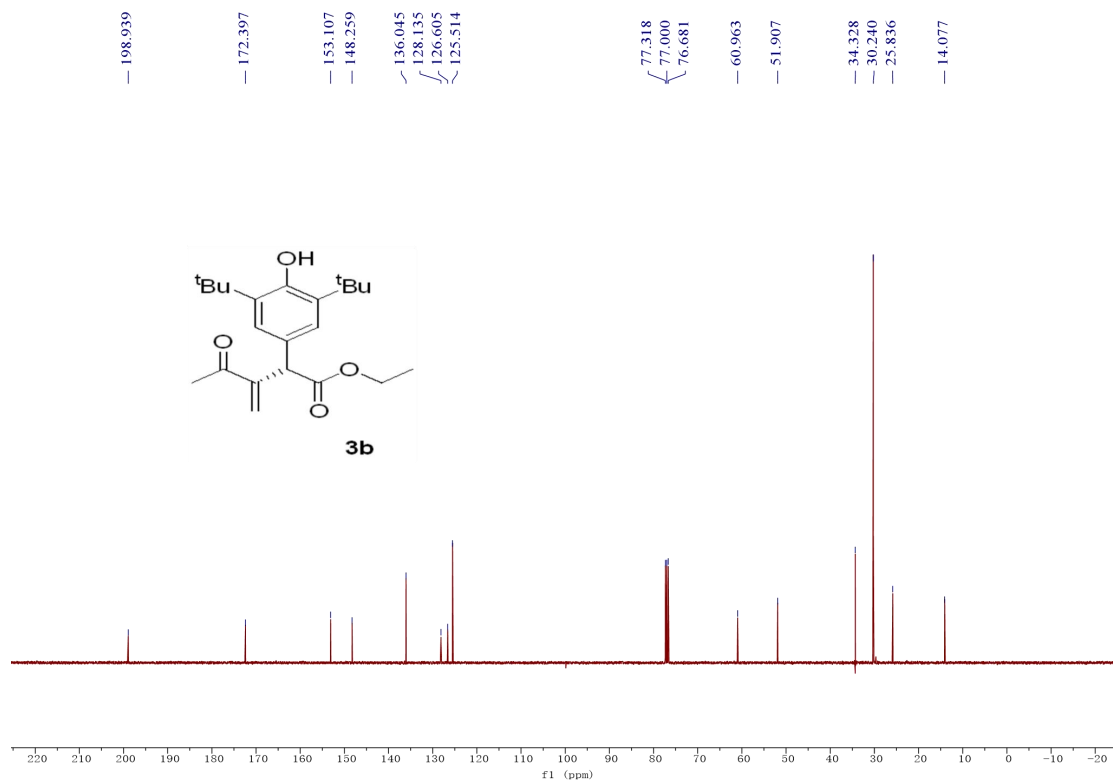

$^1\text{H}$  and  $^{13}\text{C}$  NMR spectra of compound **3b**

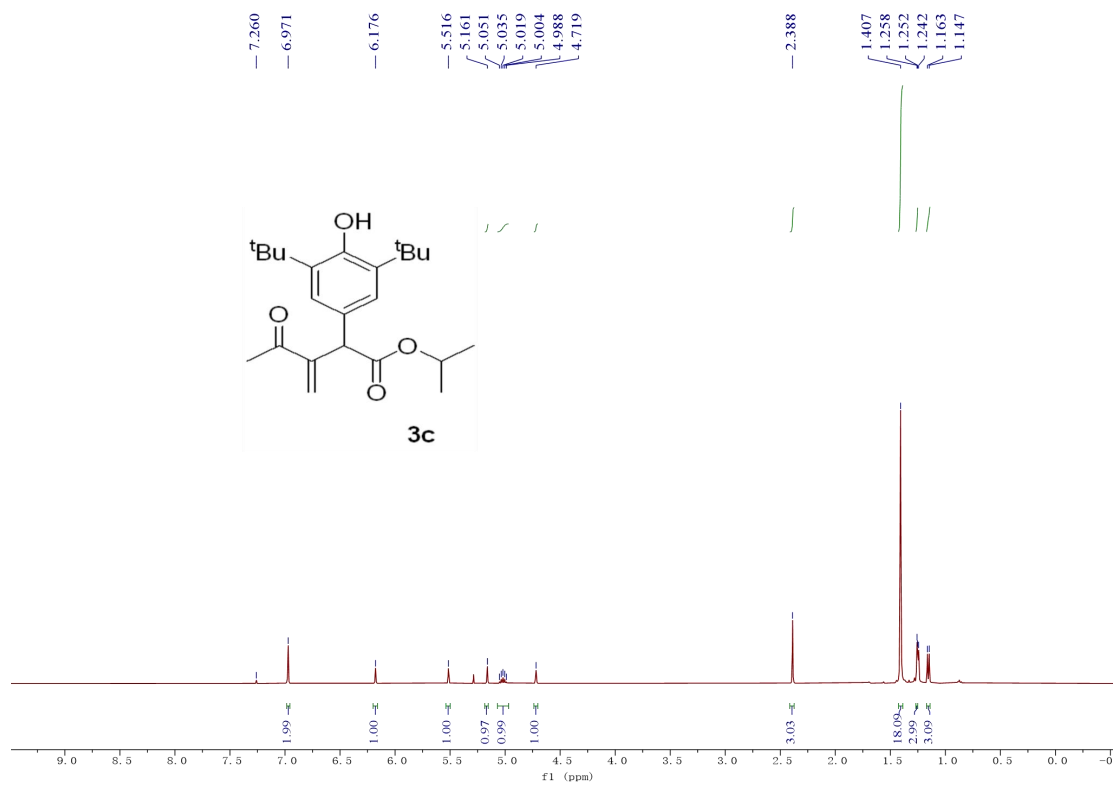

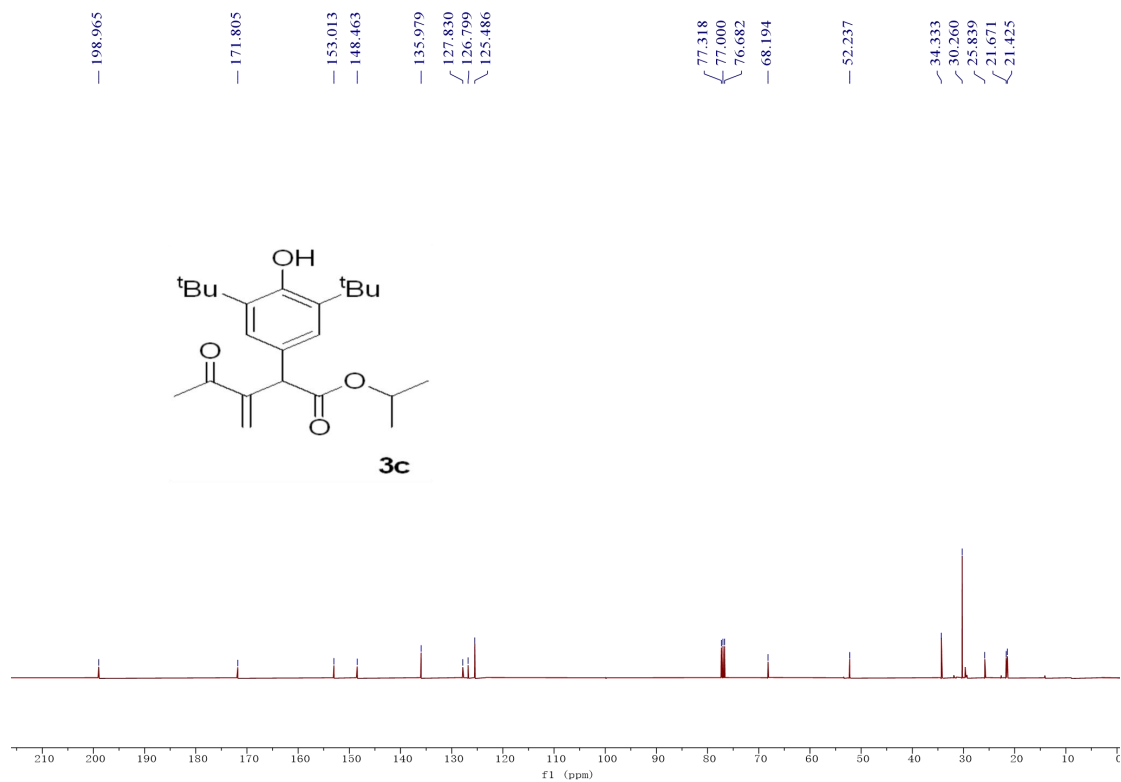

$^1\text{H}$  and  $^{13}\text{C}$  NMR spectra of compound **3c**

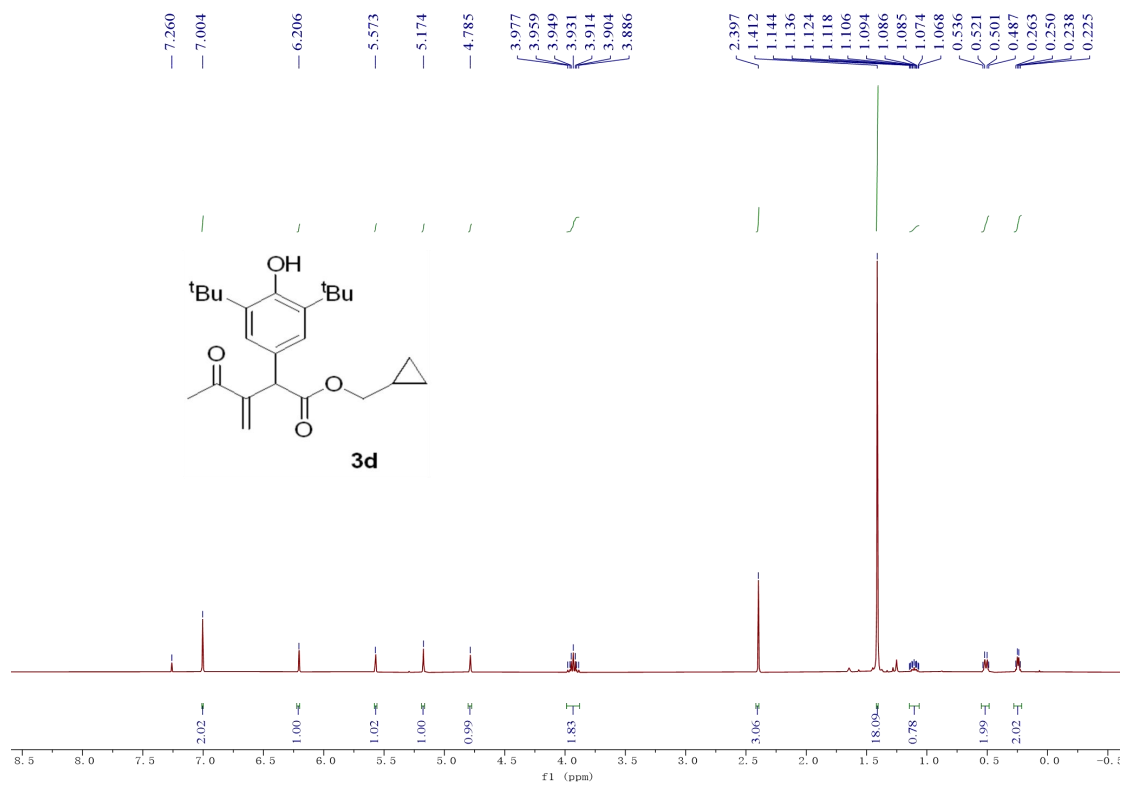

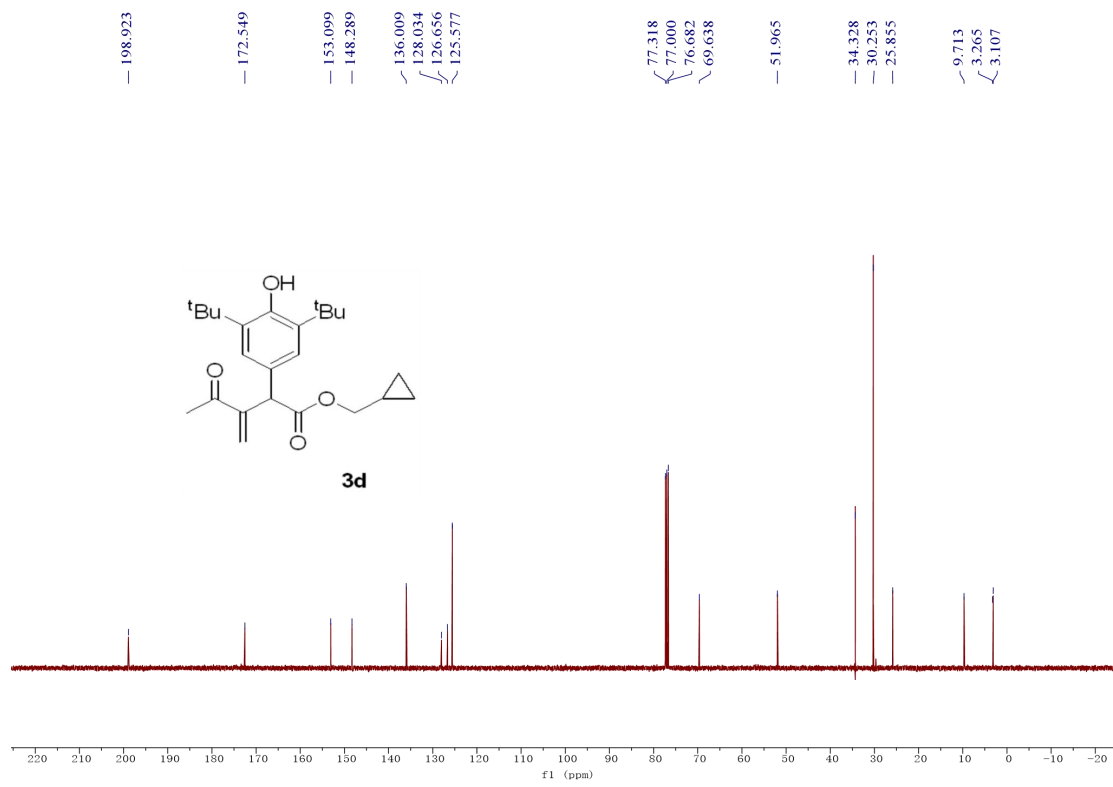

<sup>1</sup>H and <sup>13</sup>C NMR spectra of compound **3d**

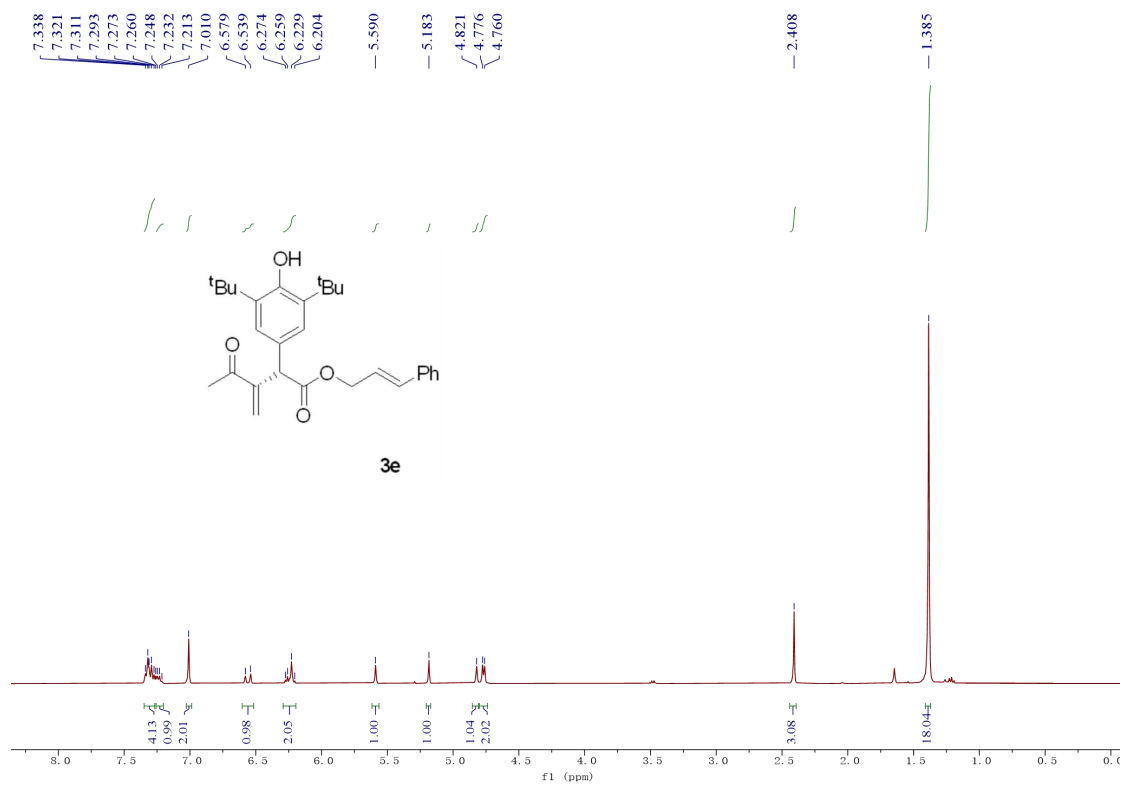

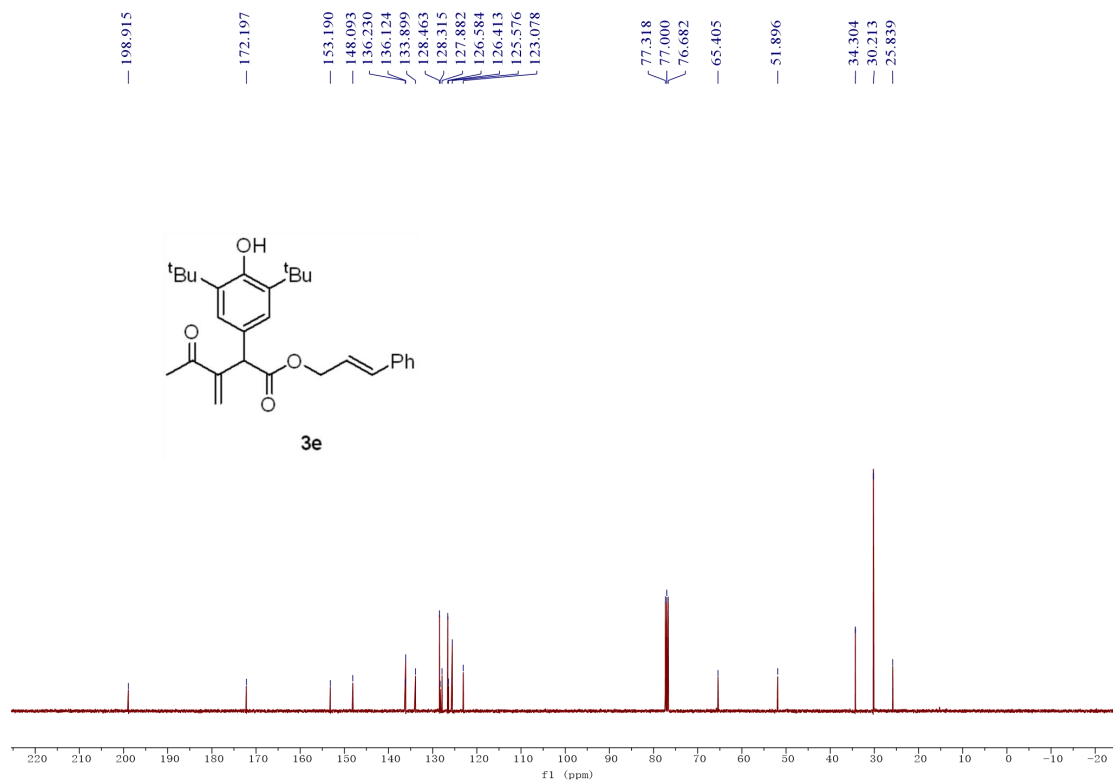

**<sup>1</sup>H and <sup>13</sup>C NMR spectra of compound 3e**

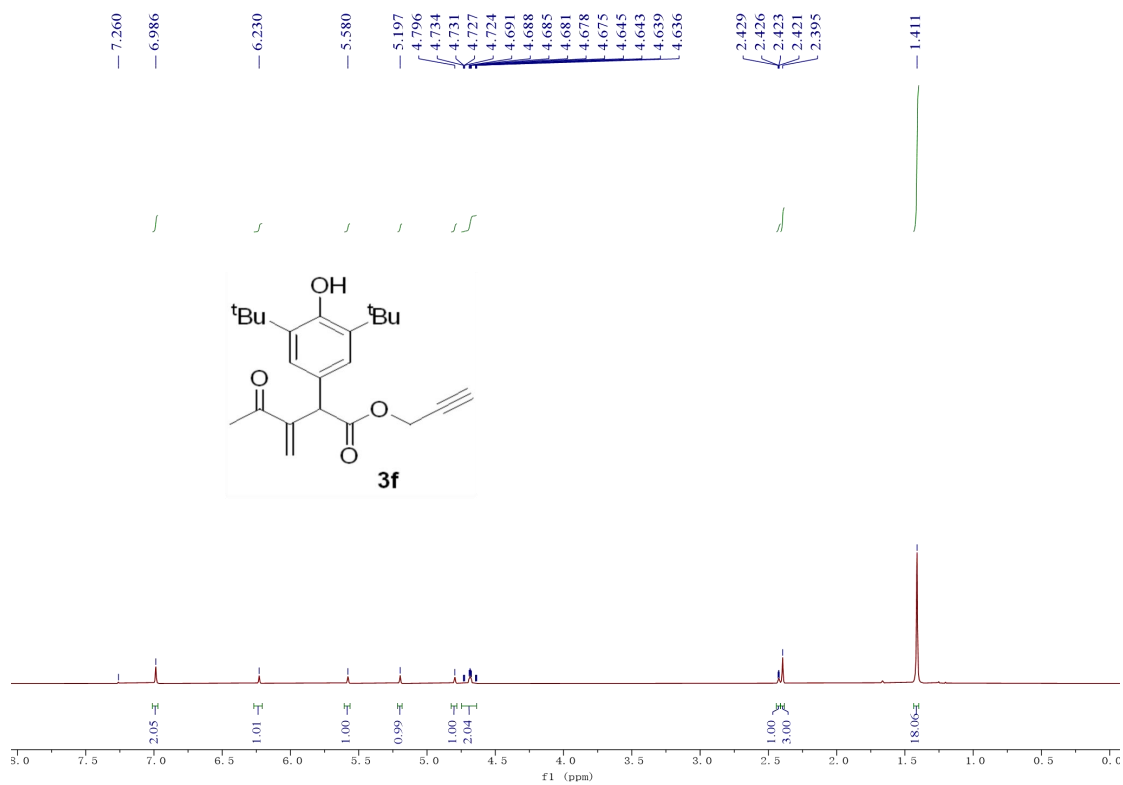

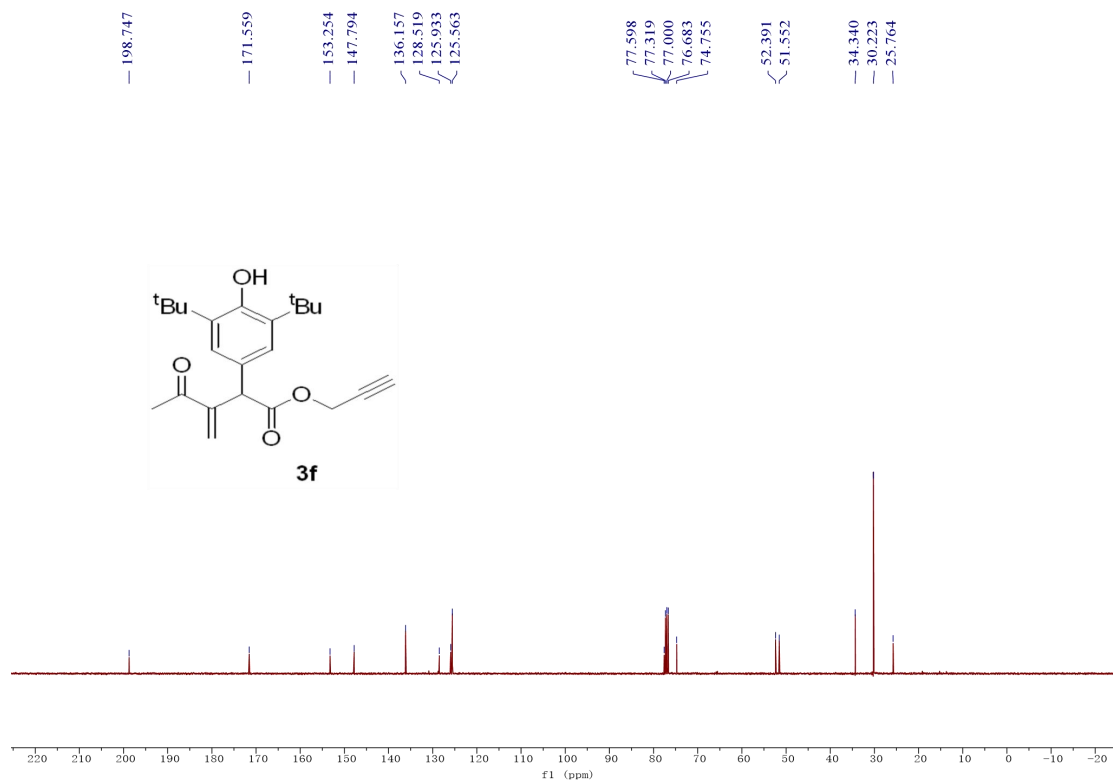

$^1\text{H}$  and  $^{13}\text{C}$  NMR spectra of compound **3f**

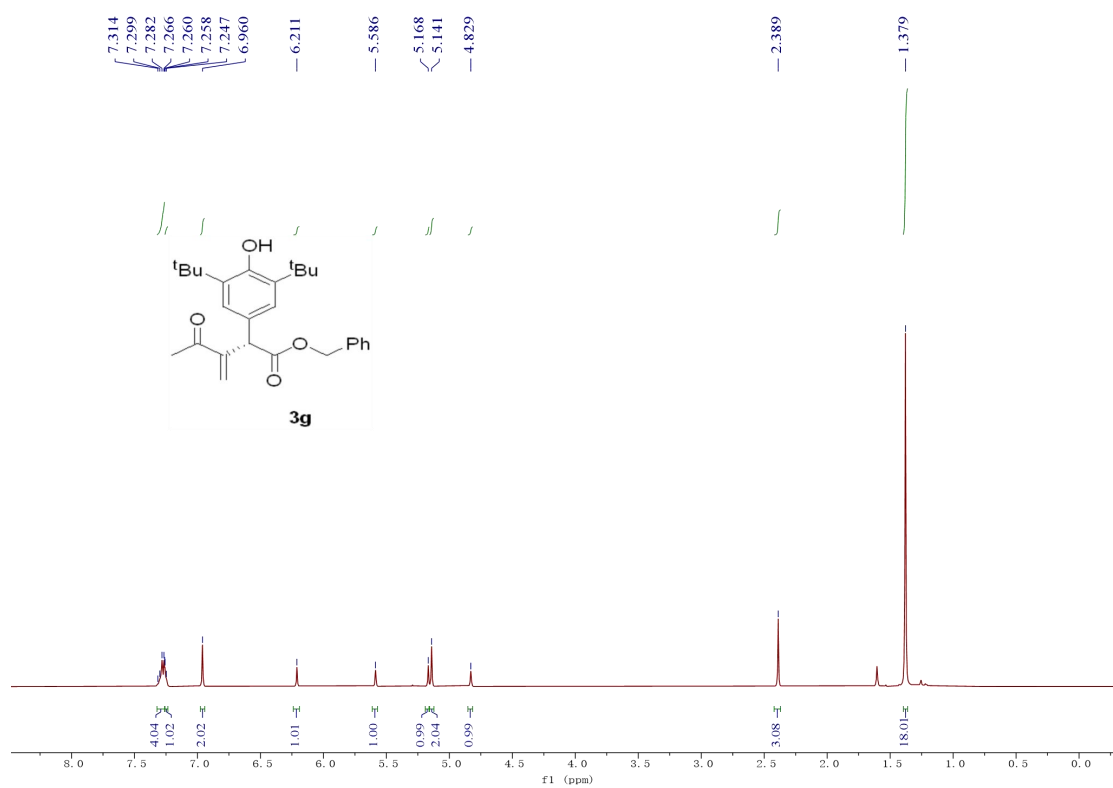

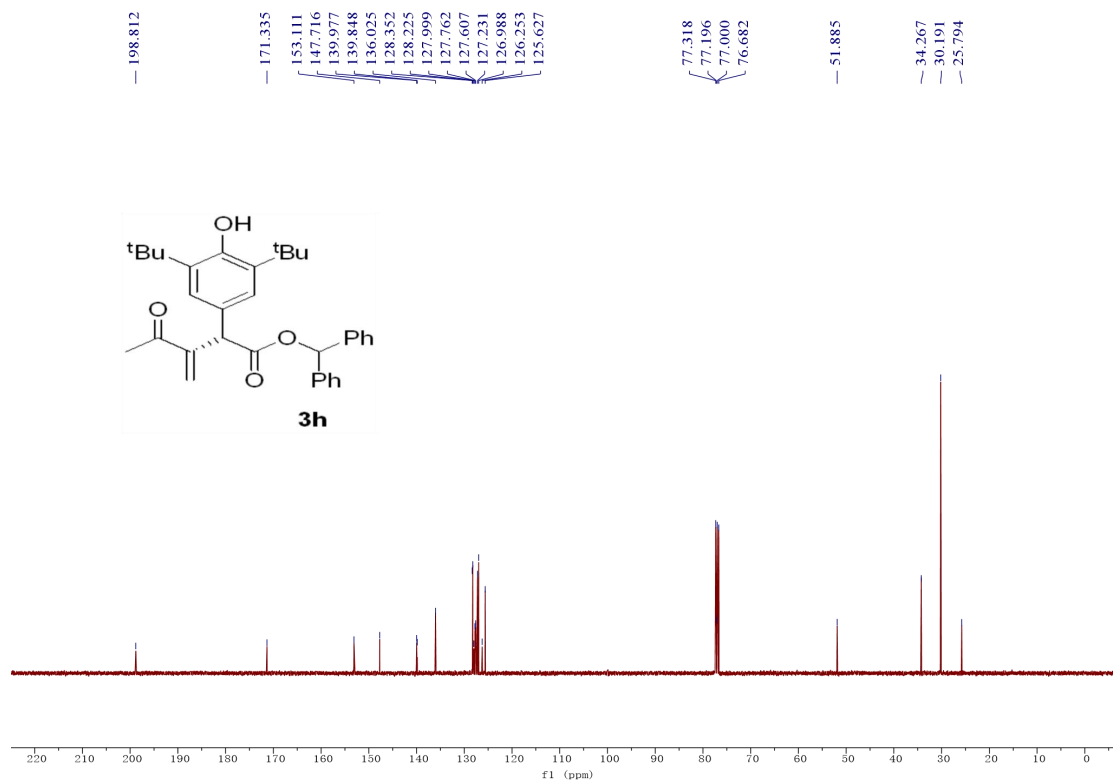

<sup>1</sup>H and <sup>13</sup>C NMR spectra of compound **3g**

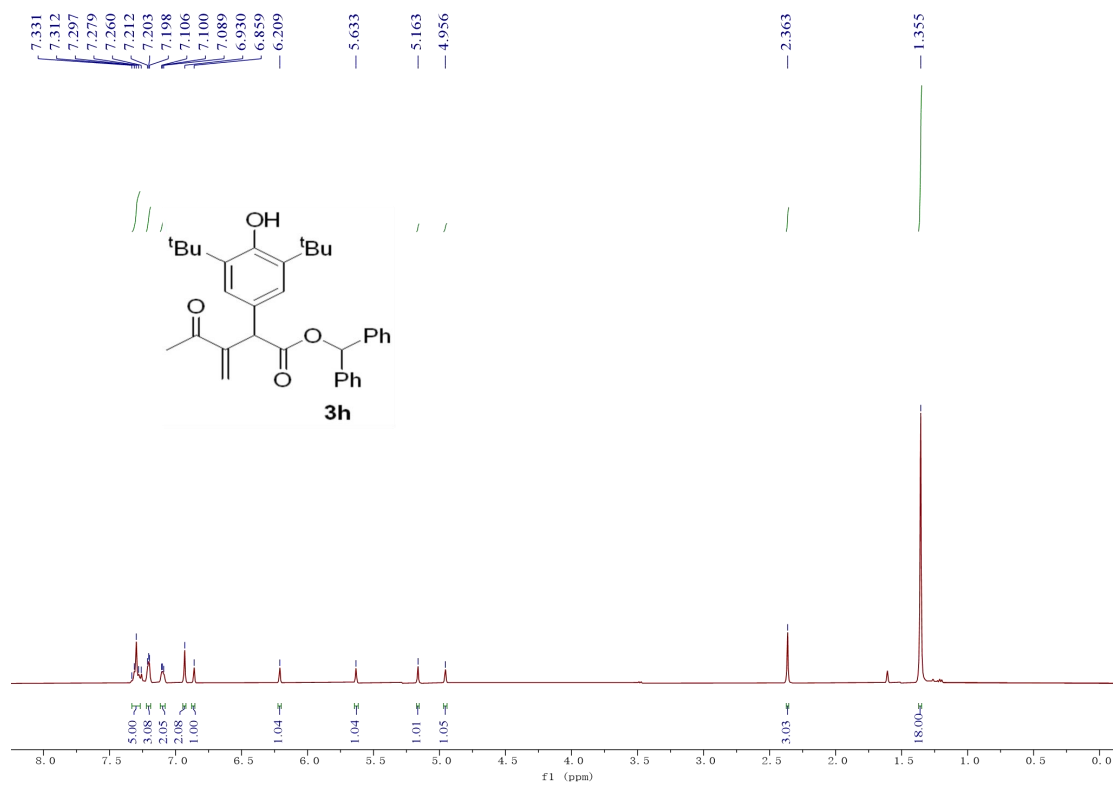

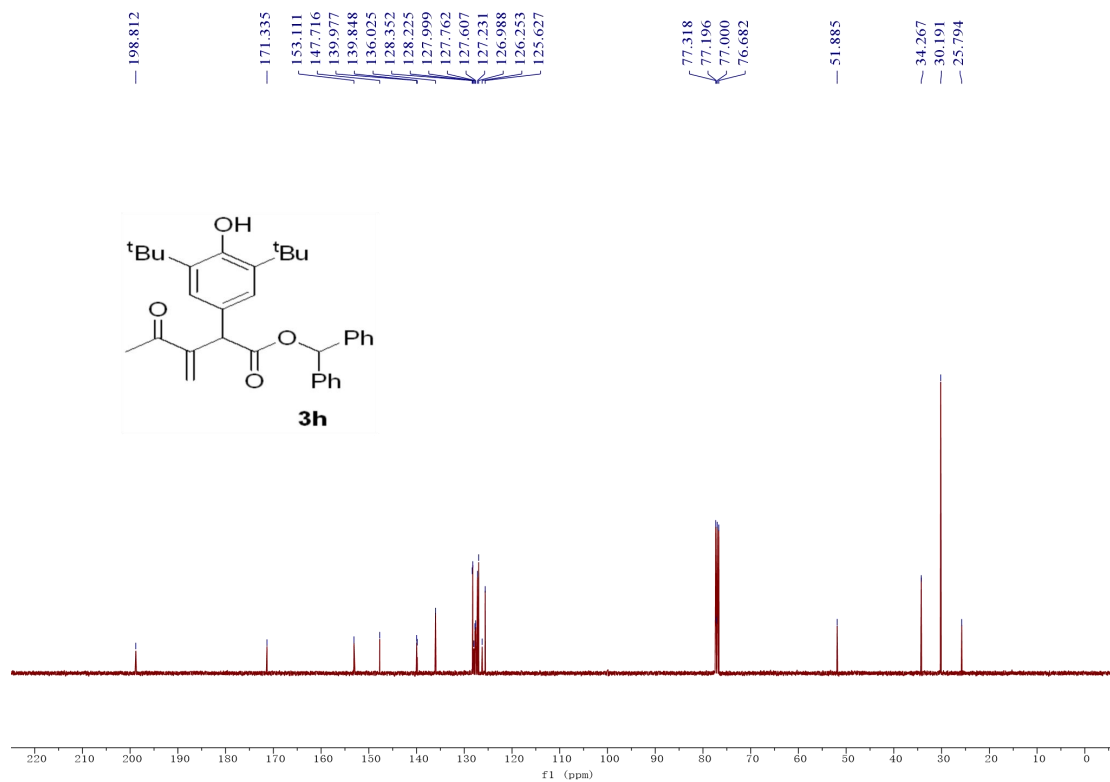

<sup>1</sup>H and <sup>13</sup>C NMR spectra of compound **3h**

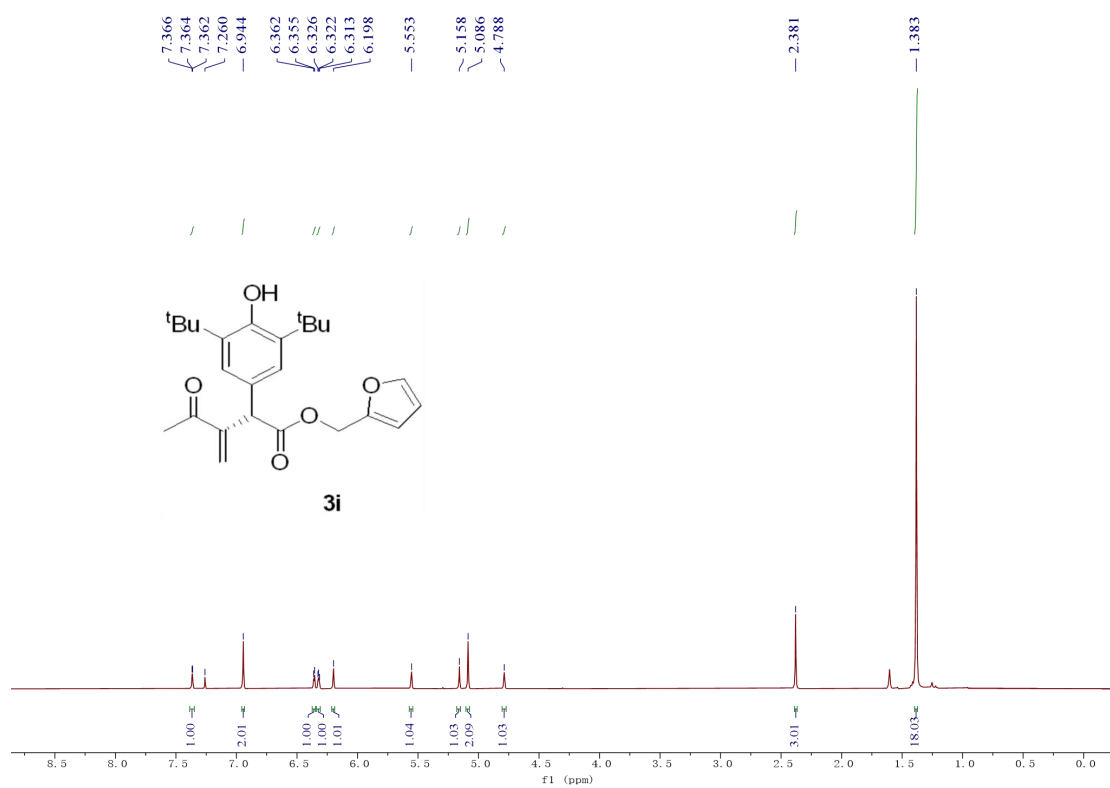



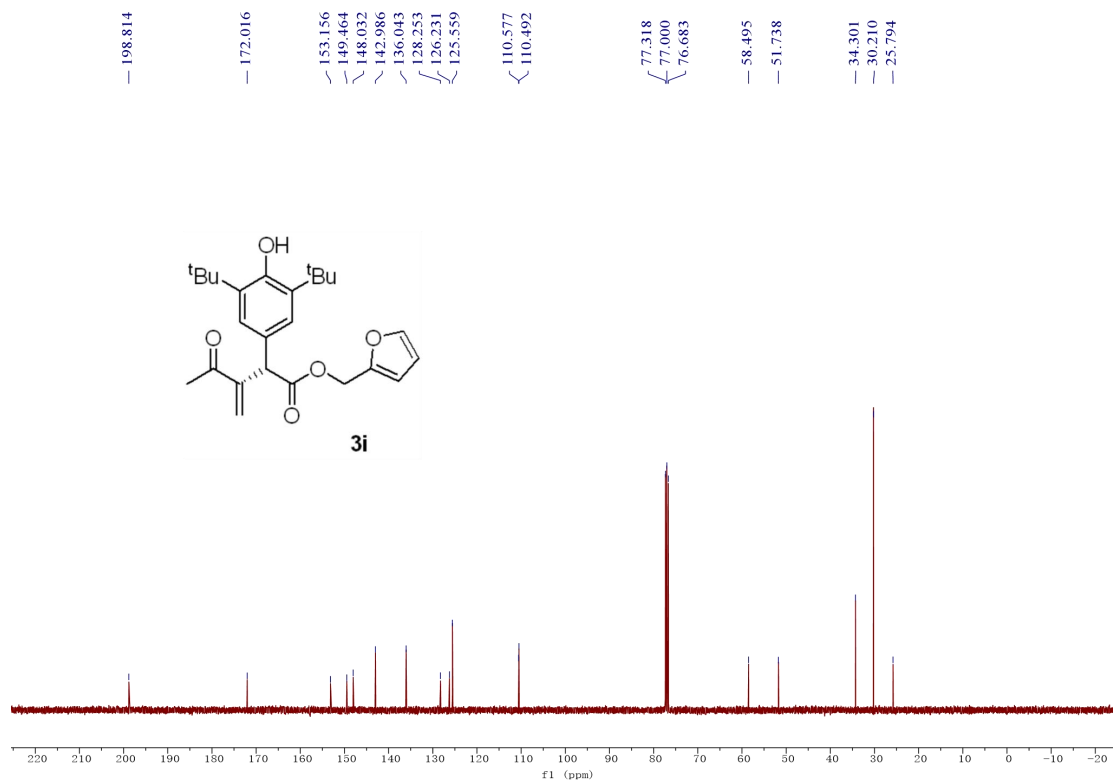

$^1\text{H}$  and  $^{13}\text{C}$  NMR spectra of compound **3i**

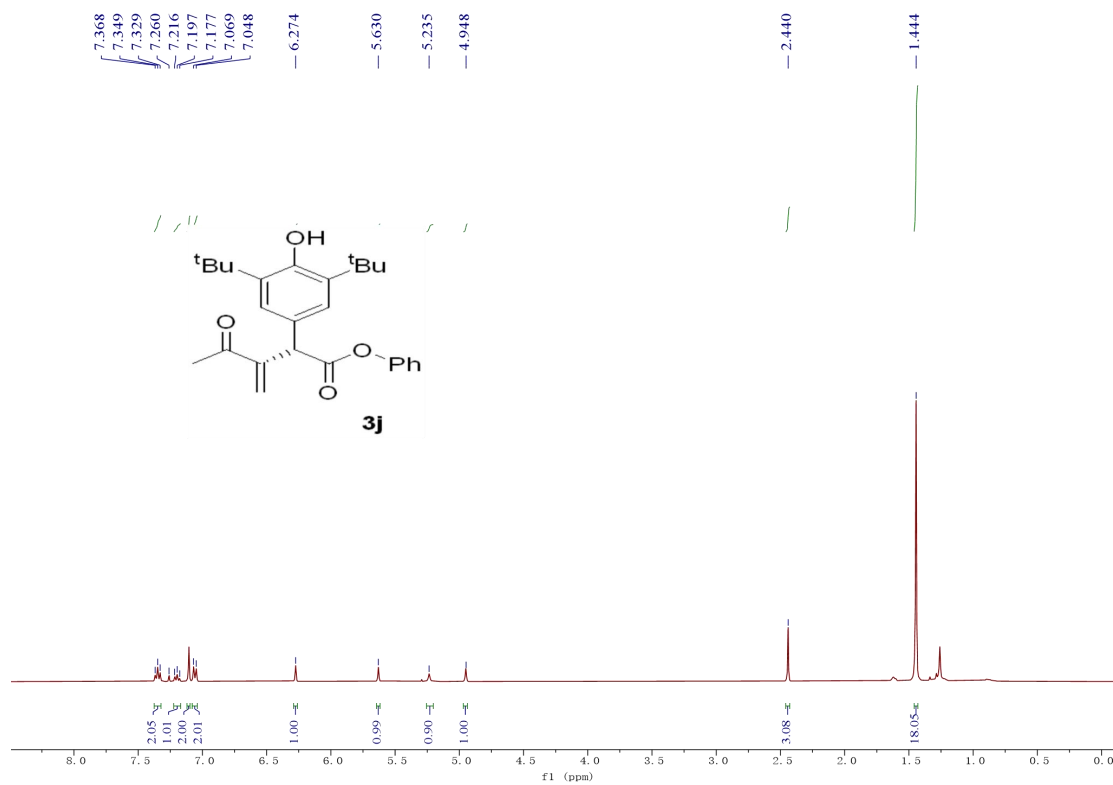

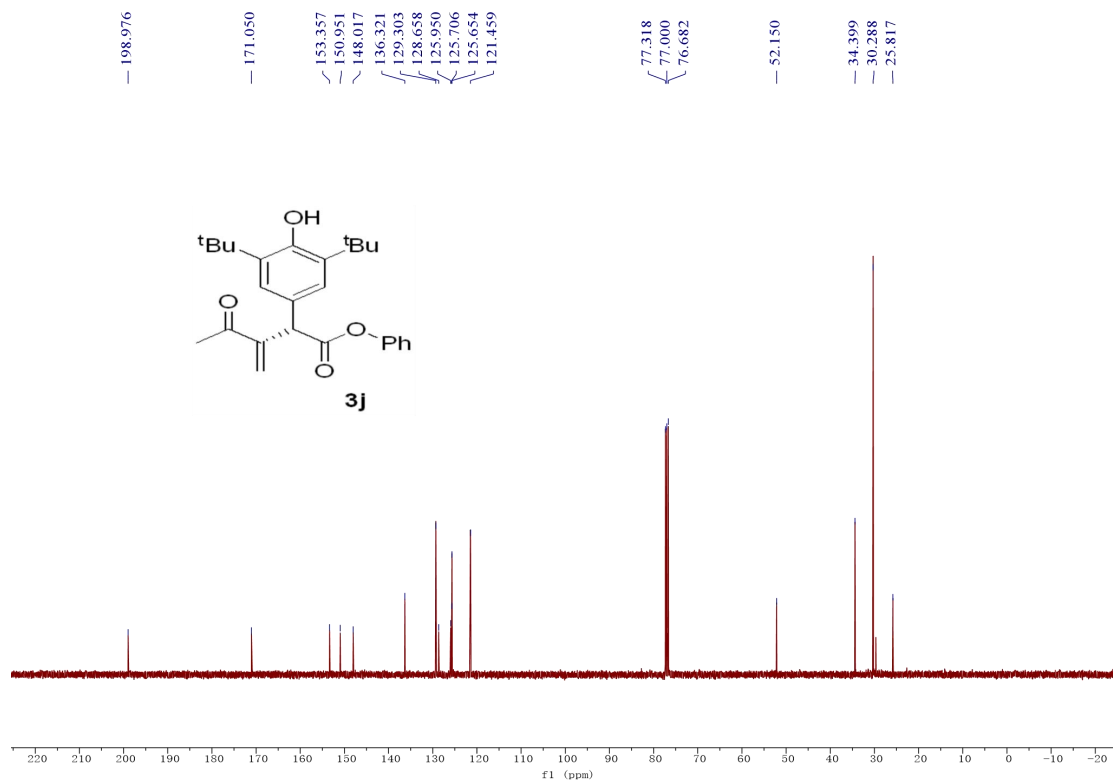

**<sup>1</sup>H and <sup>13</sup>C NMR spectra of compound 3j**

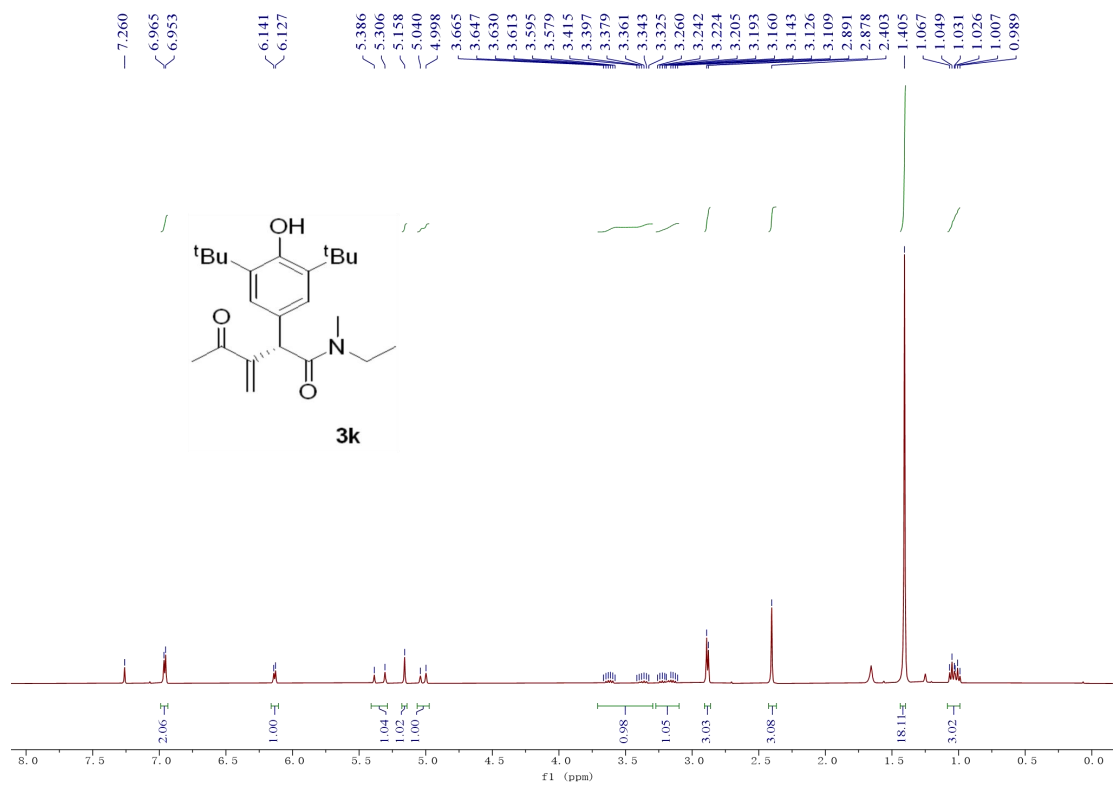

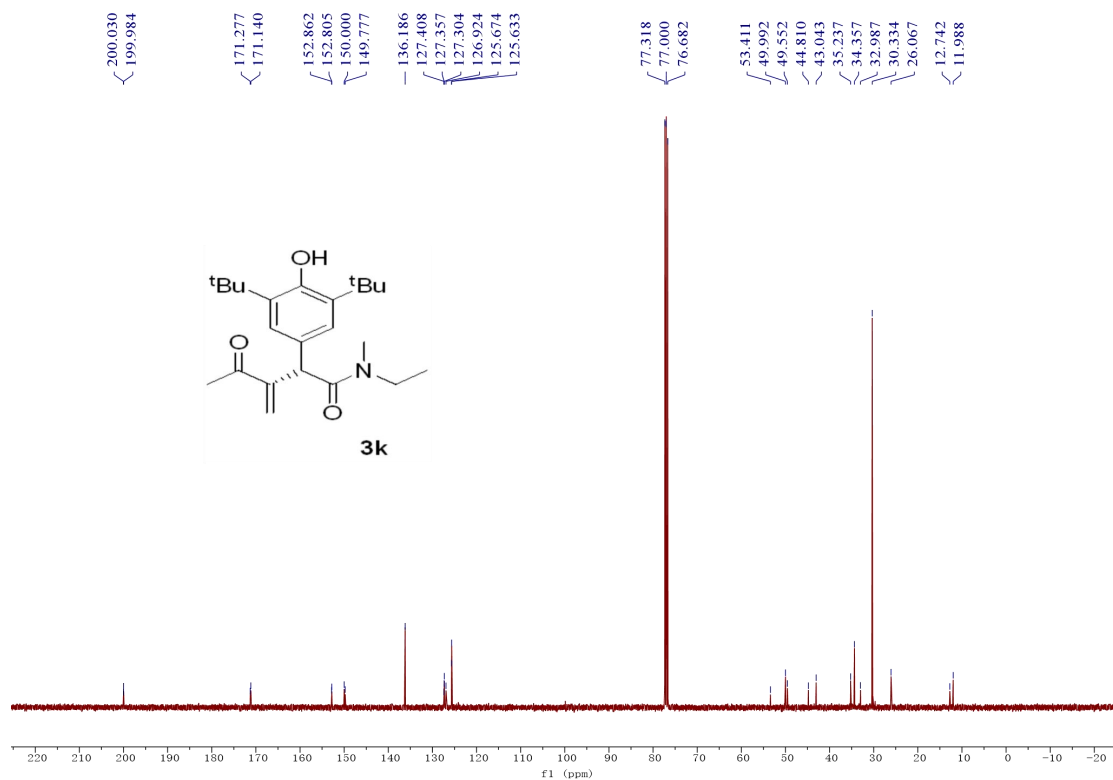

<sup>1</sup>H and <sup>13</sup>C NMR spectra of compound **3k**

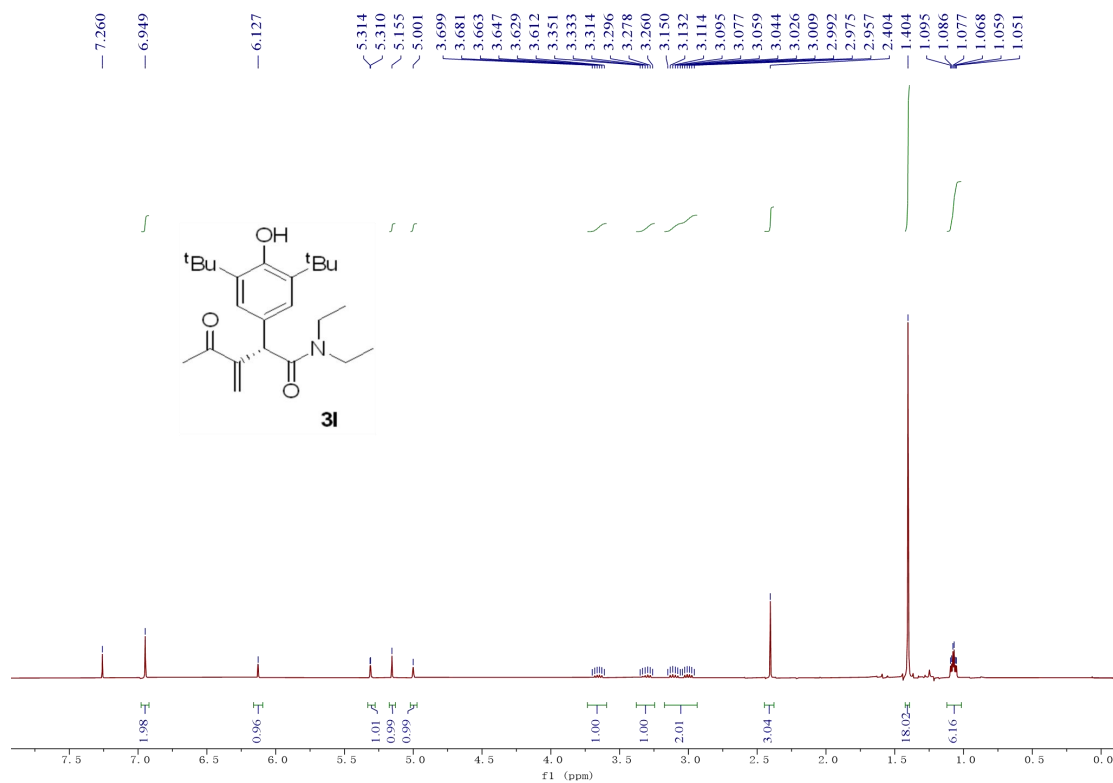

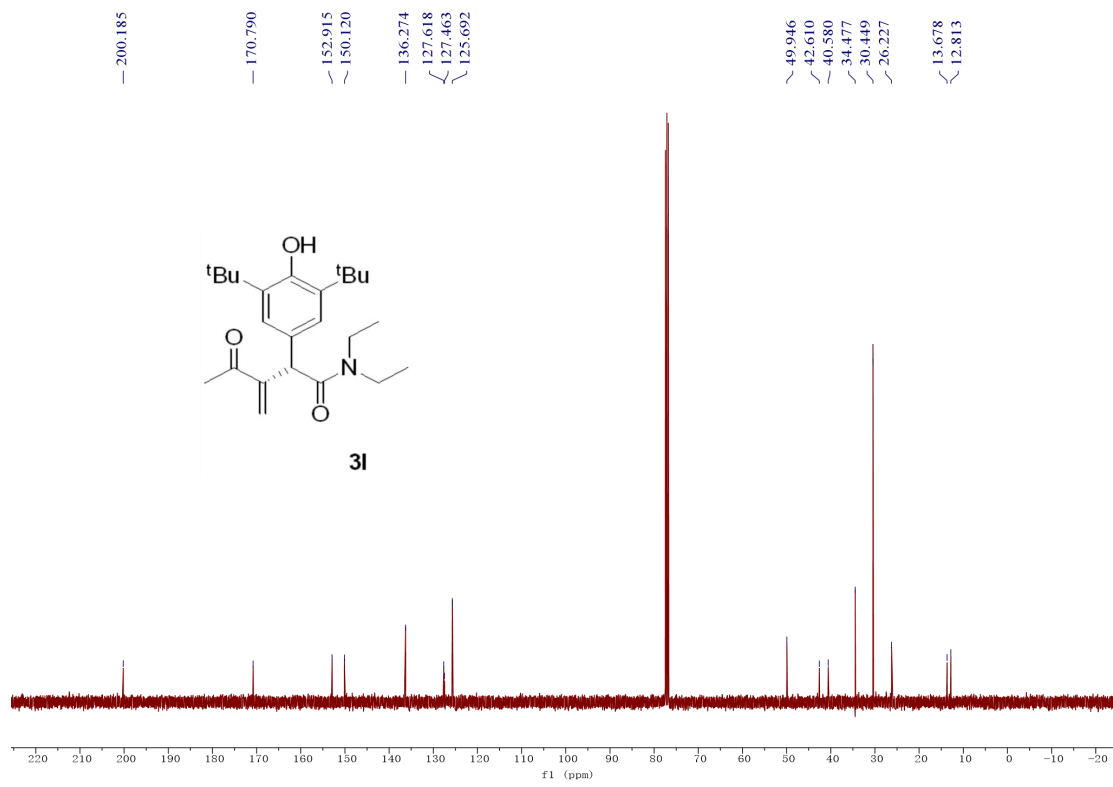

<sup>1</sup>H and <sup>13</sup>C NMR spectra of compound **3l**

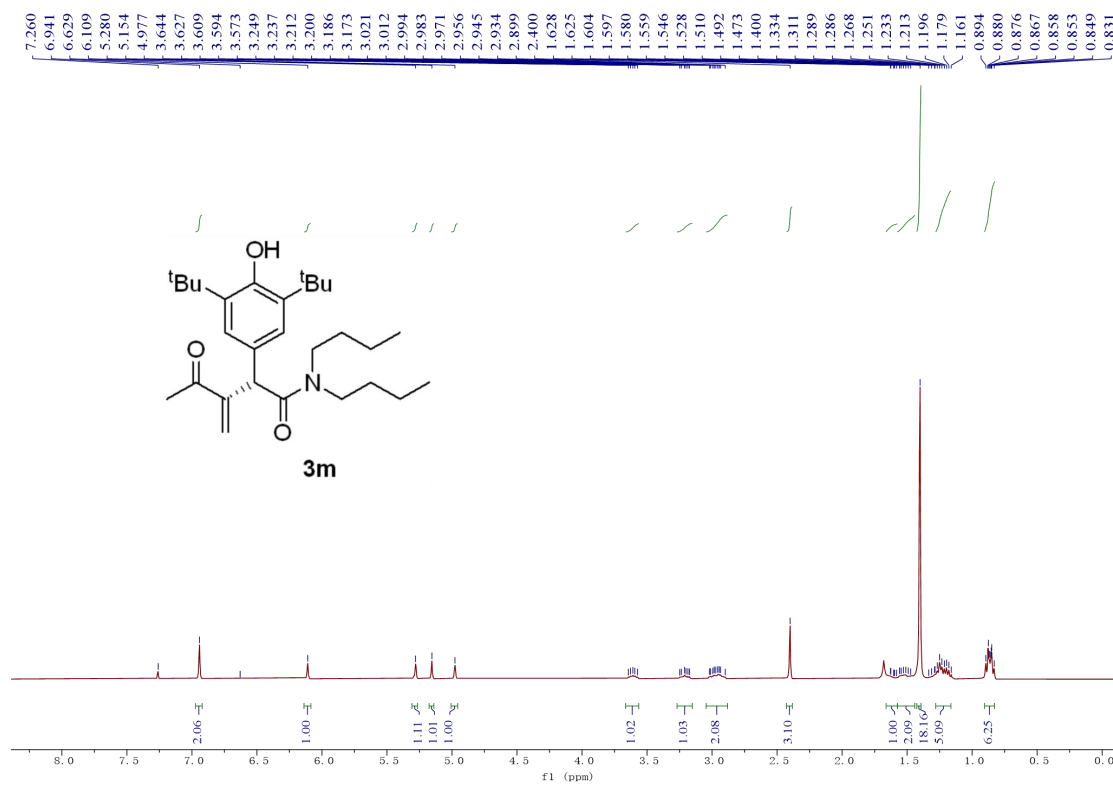

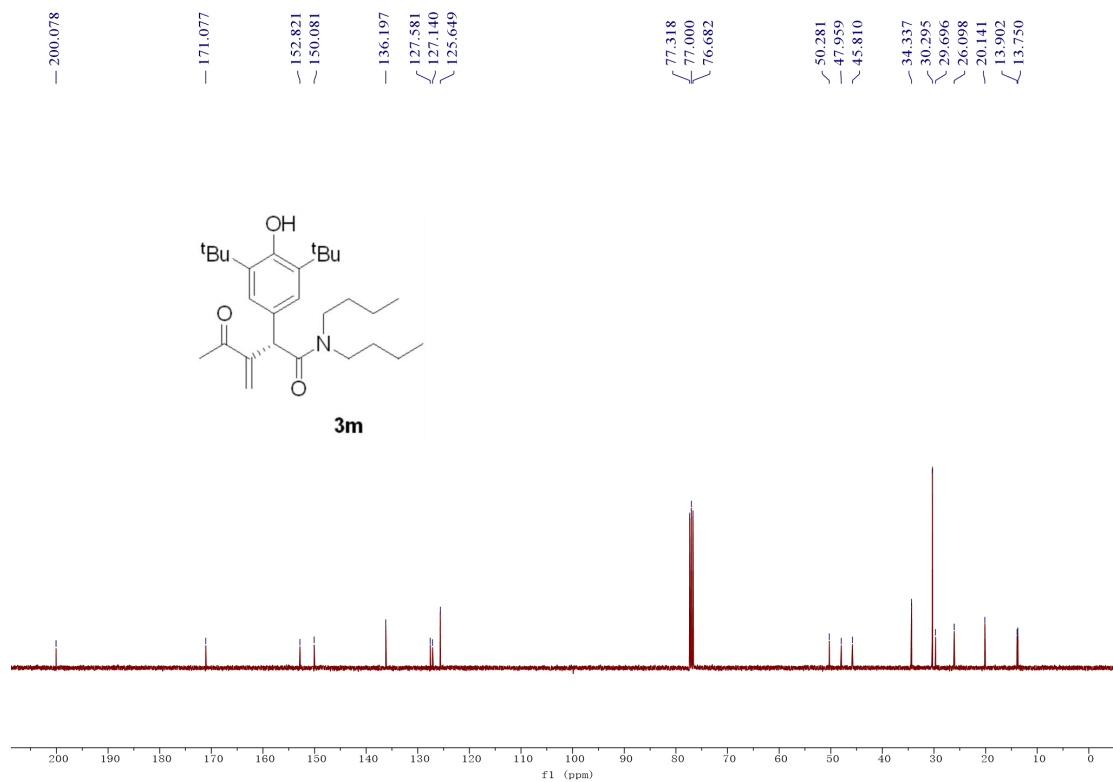

$^1\text{H}$  and  $^{13}\text{C}$  NMR spectra of compound **3m**

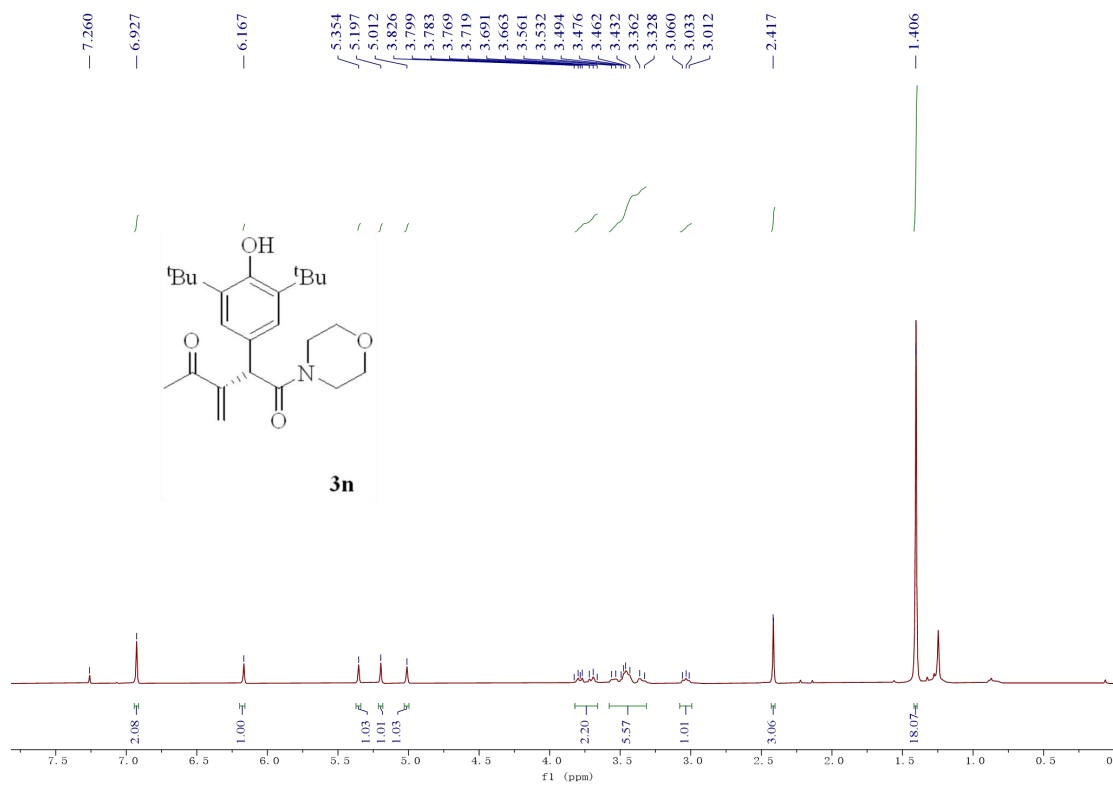

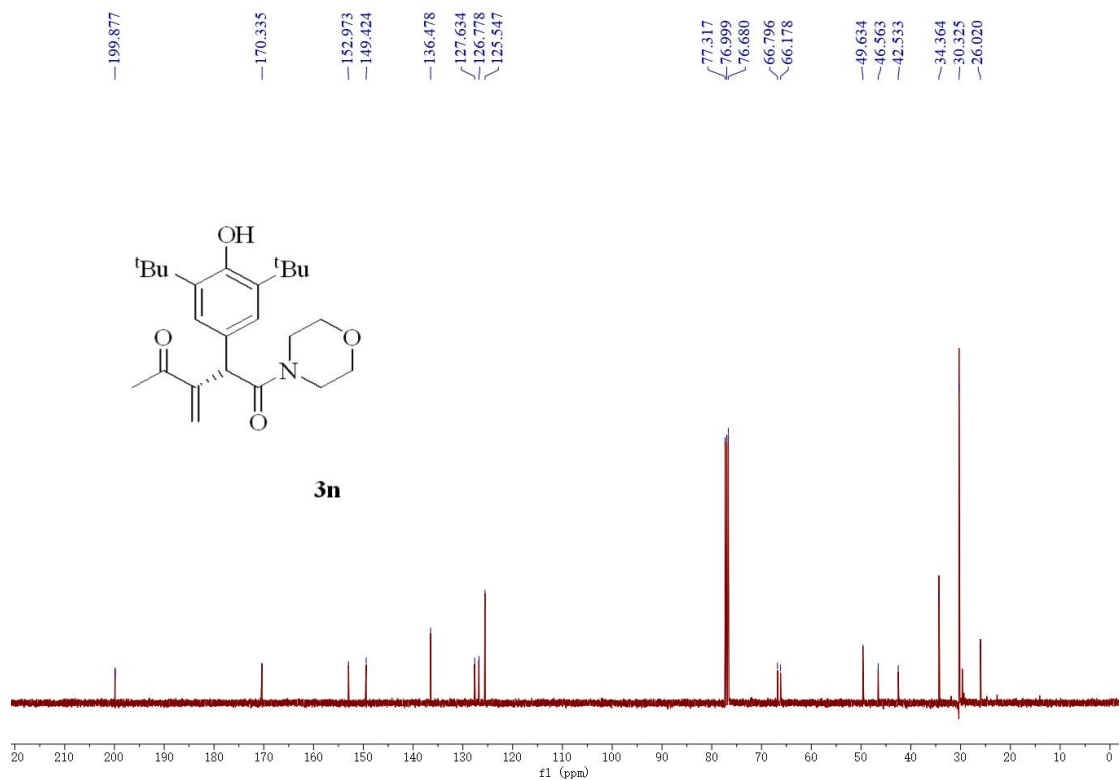

**<sup>1</sup>H and <sup>13</sup>C NMR spectra of compound 3n**

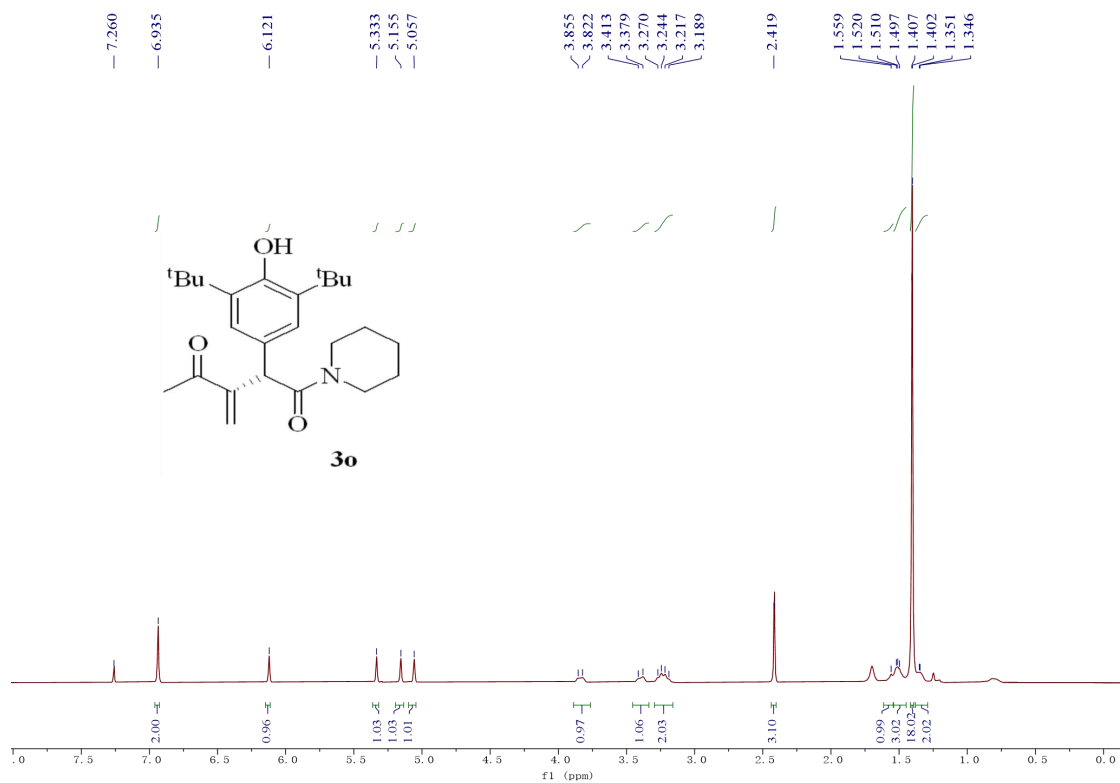

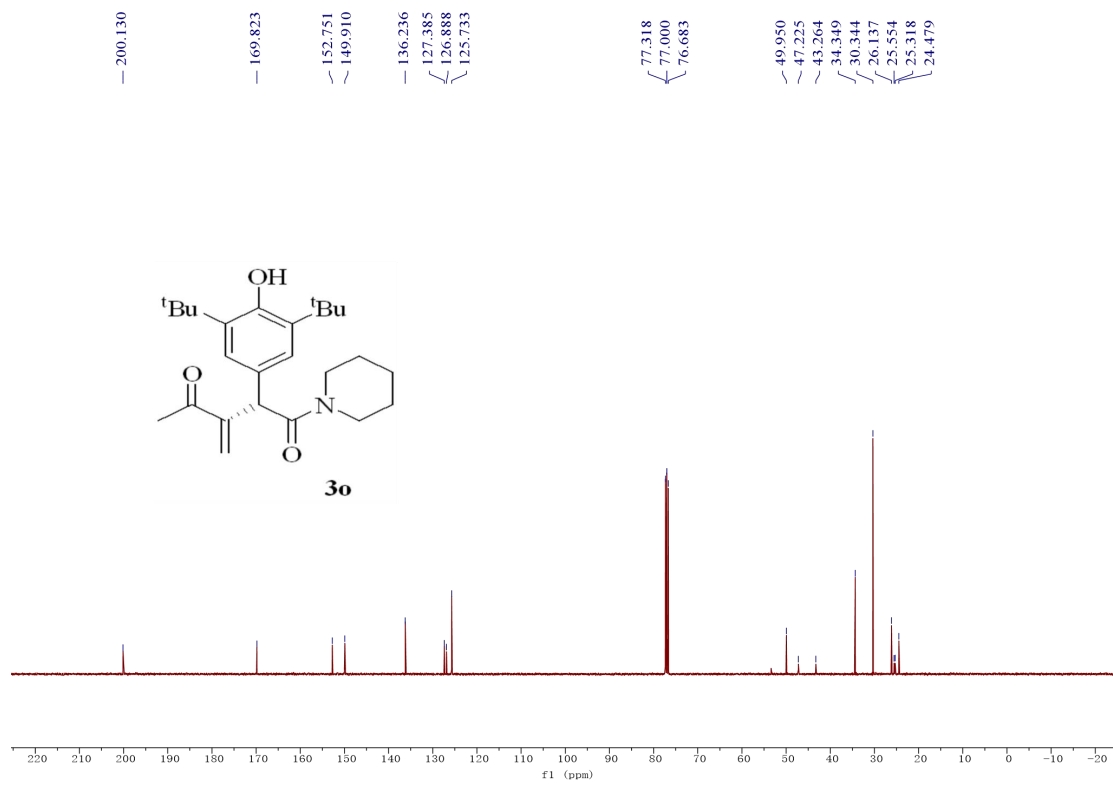

$^1\text{H}$  and  $^{13}\text{C}$  NMR spectra of compound **3o**

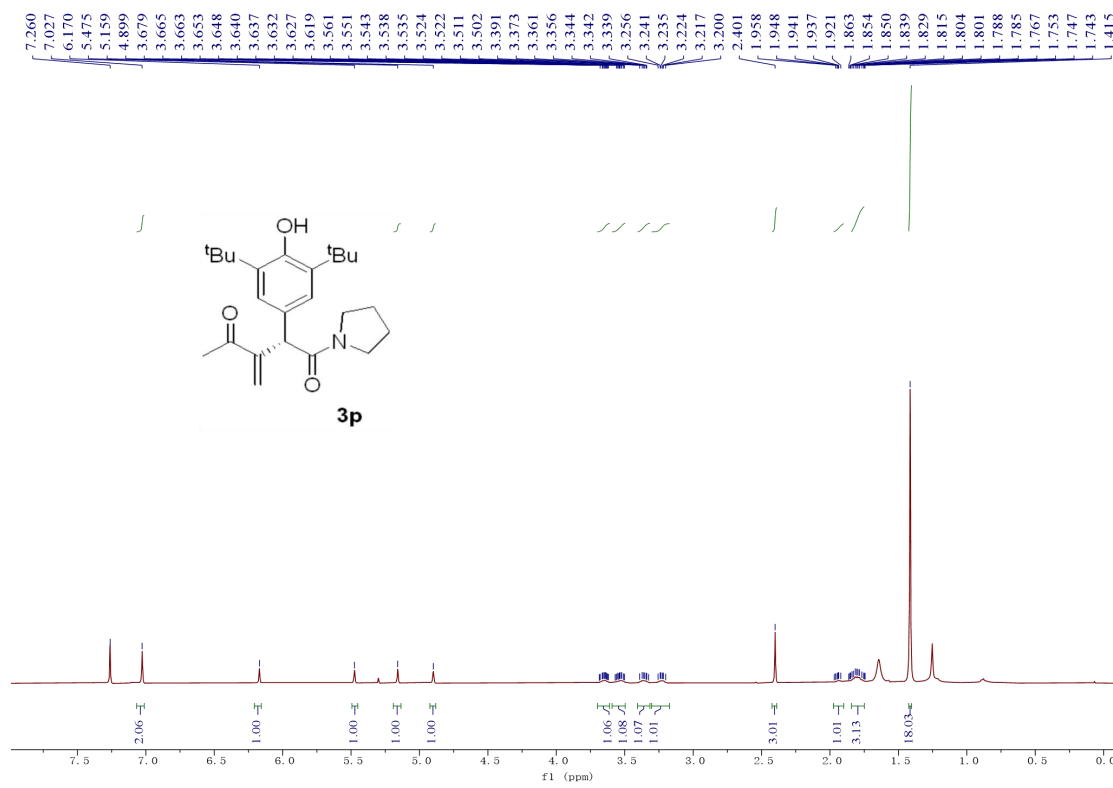

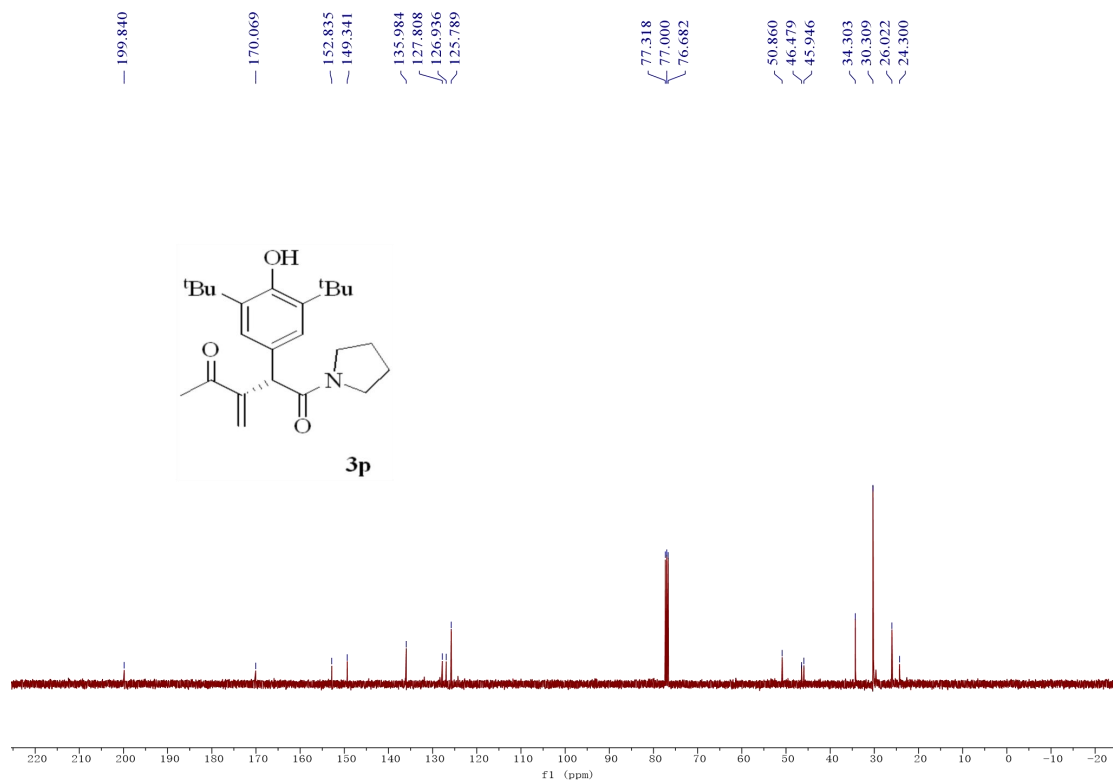

$^1\text{H}$  and  $^{13}\text{C}$  NMR spectra of compound **3p**

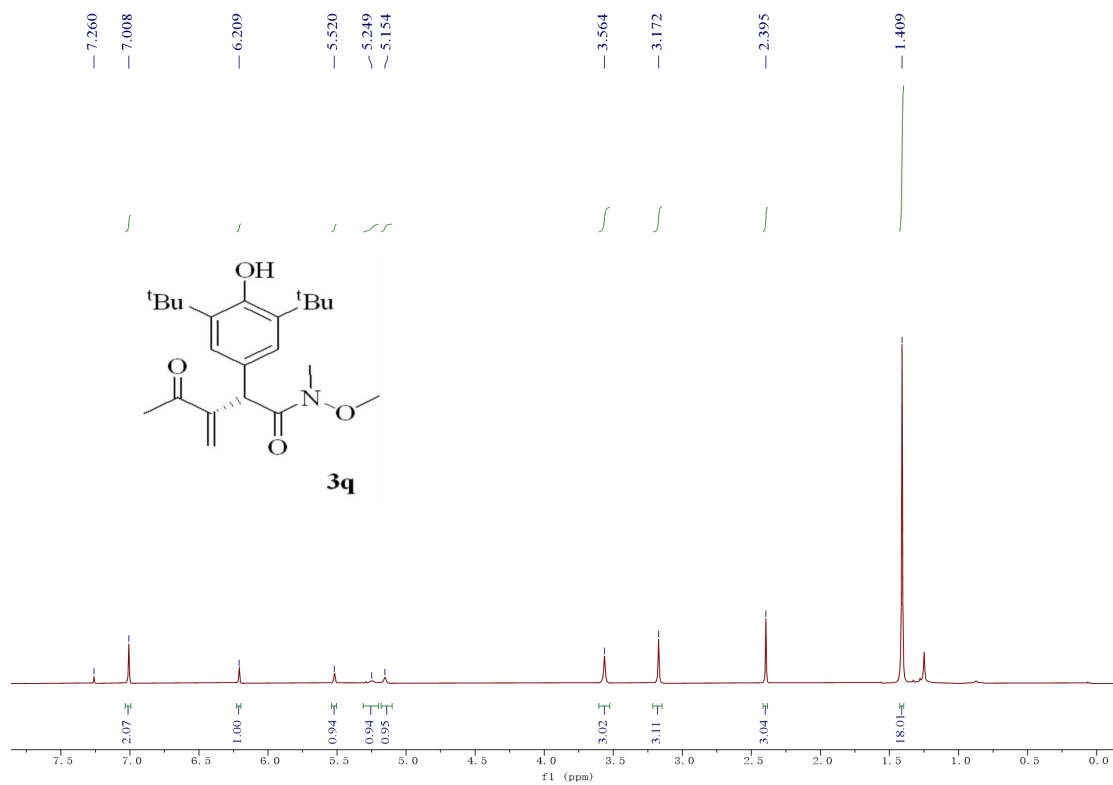



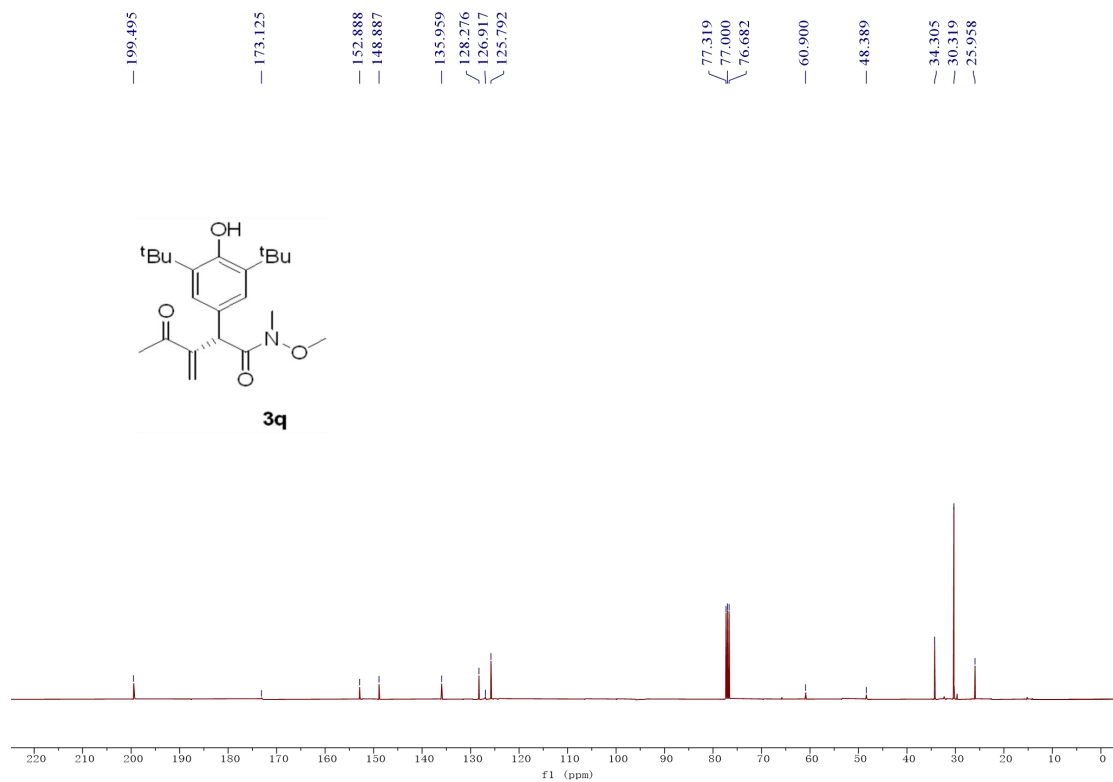

<sup>1</sup>H and <sup>13</sup>C NMR spectra of compound **3q**

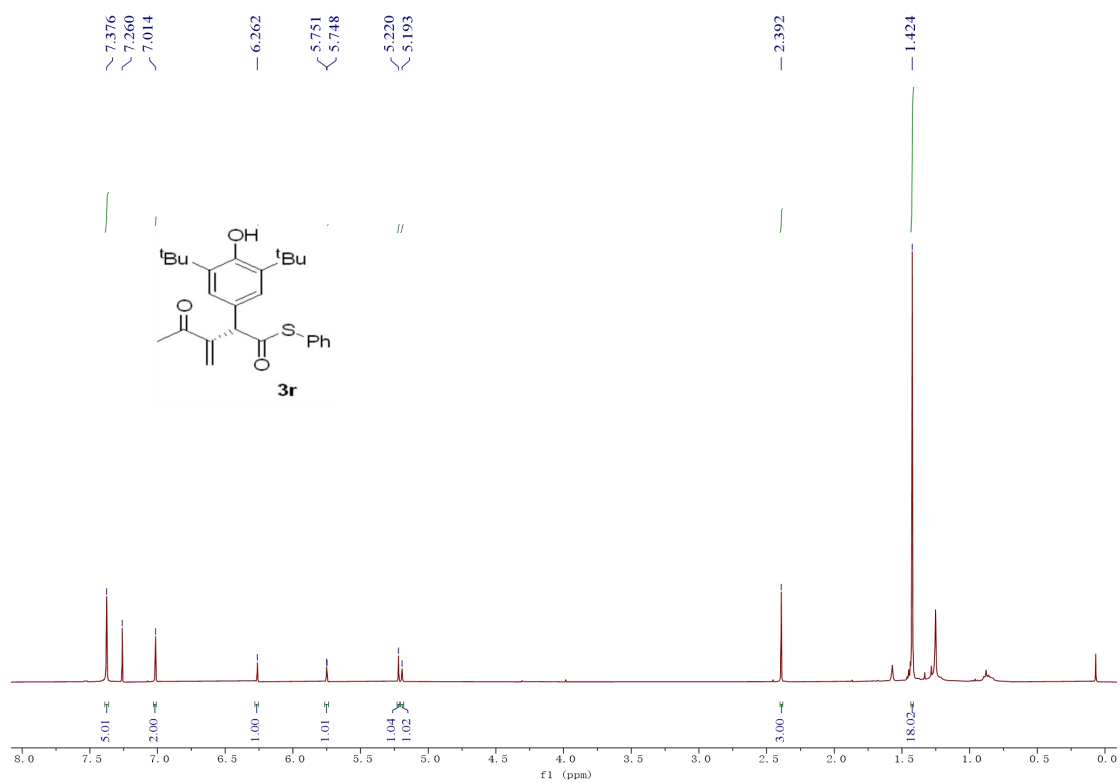

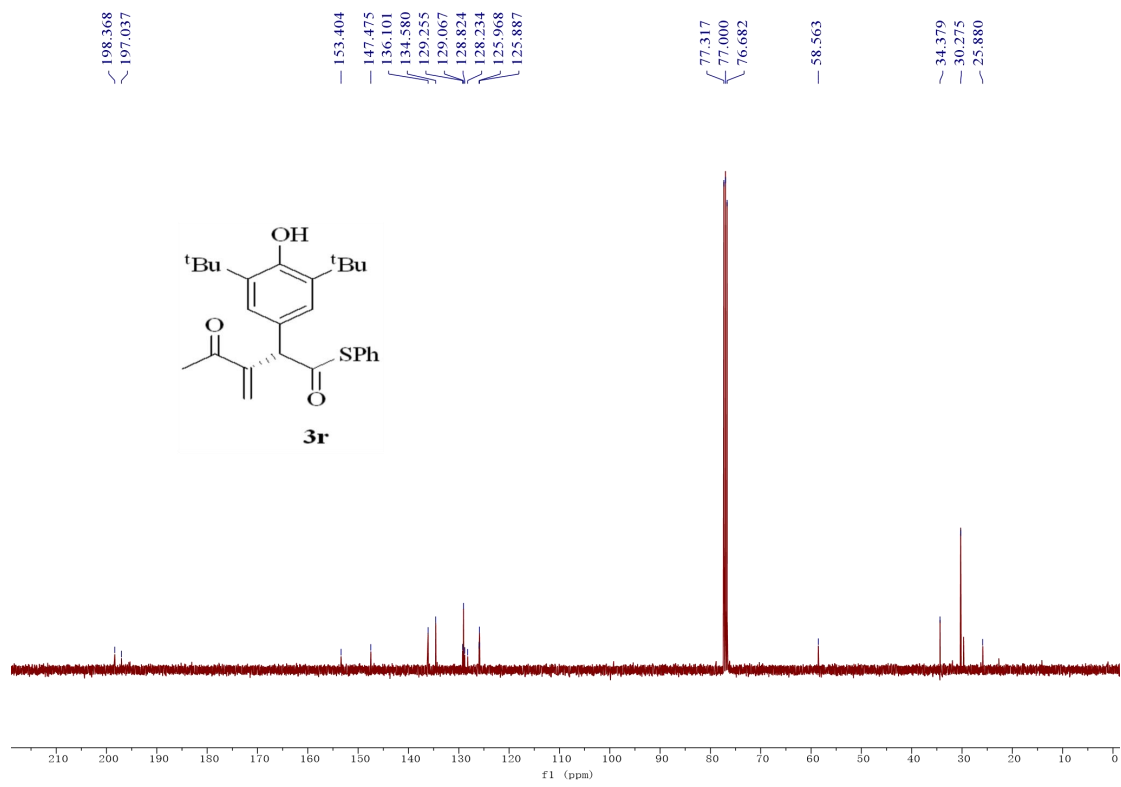

<sup>1</sup>H and <sup>13</sup>C NMR spectra of compound **3r**

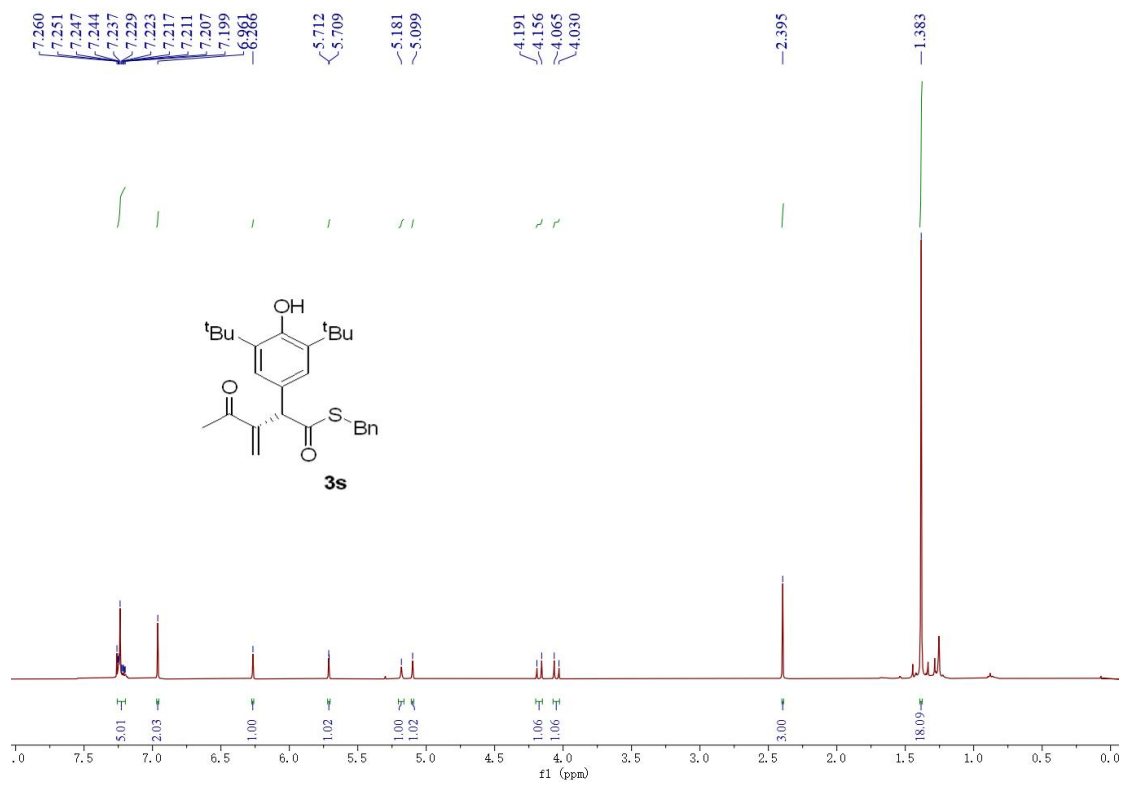

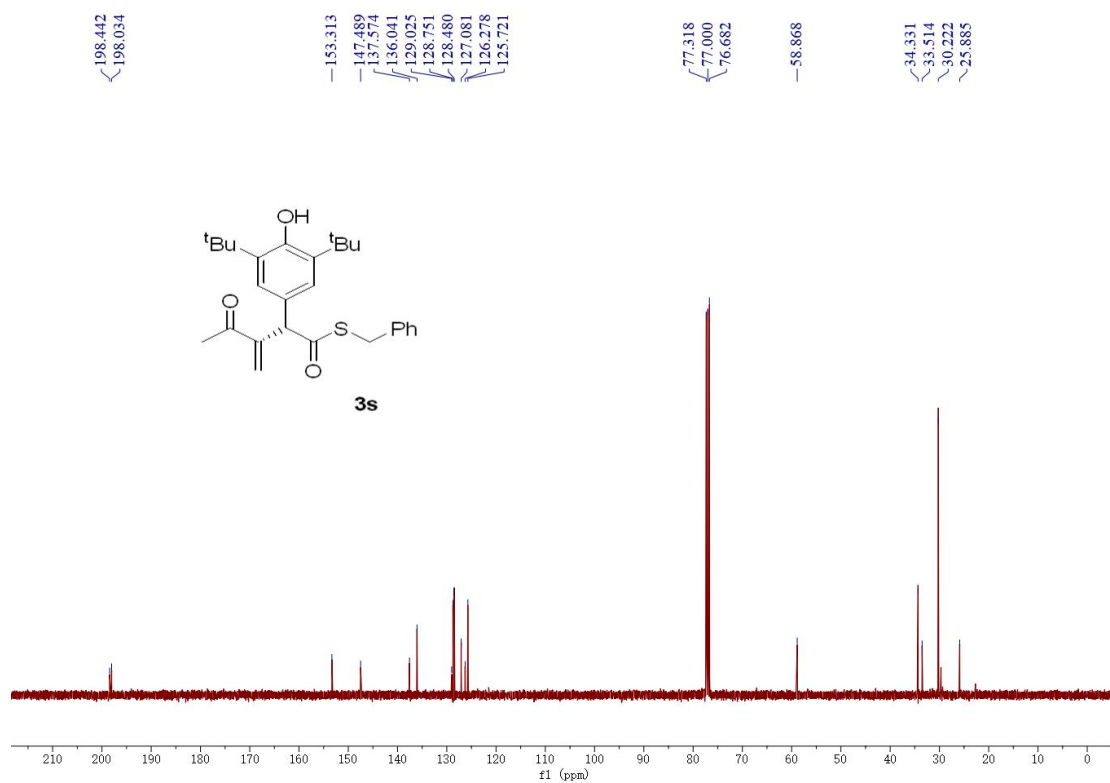

**<sup>1</sup>H and <sup>13</sup>C NMR spectra of compound 3s**

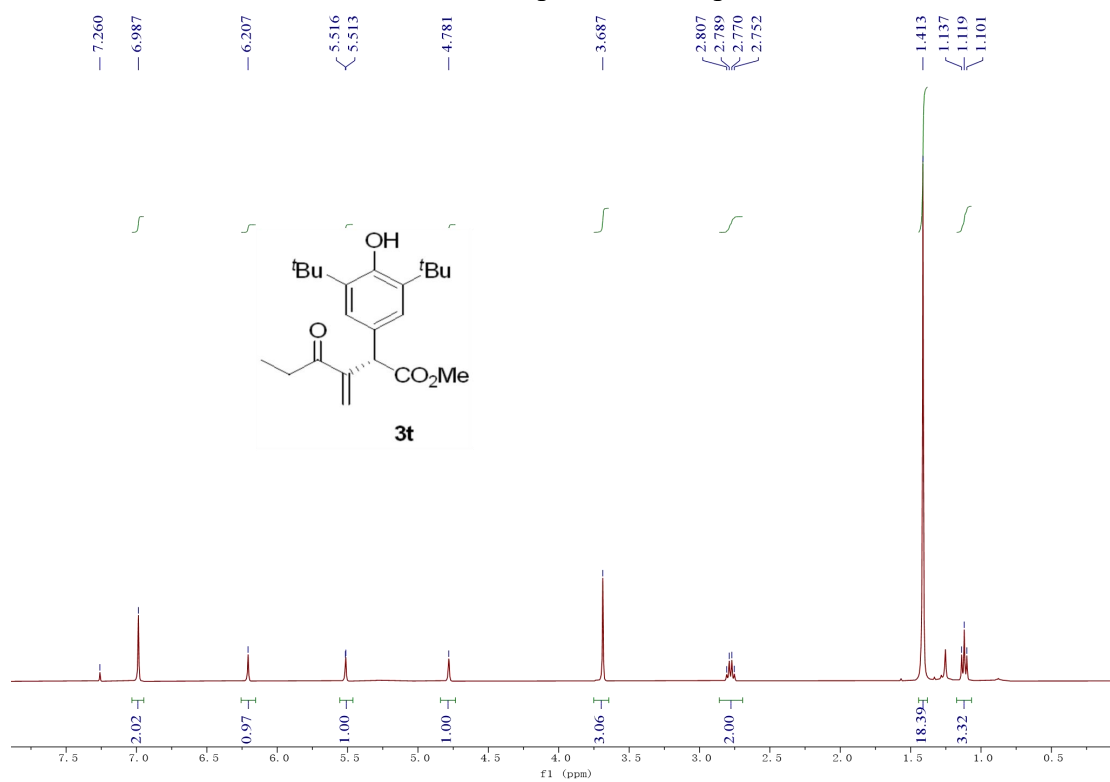

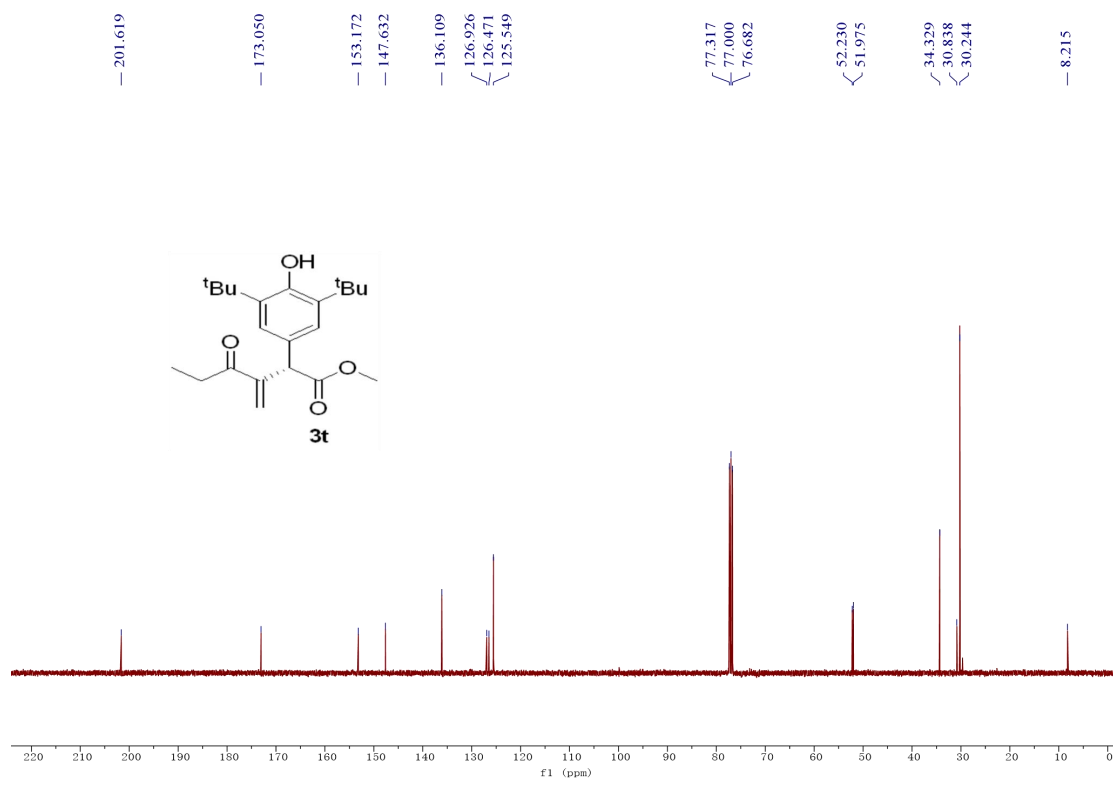

**<sup>1</sup>H and <sup>13</sup>C NMR spectra of compound 3t**

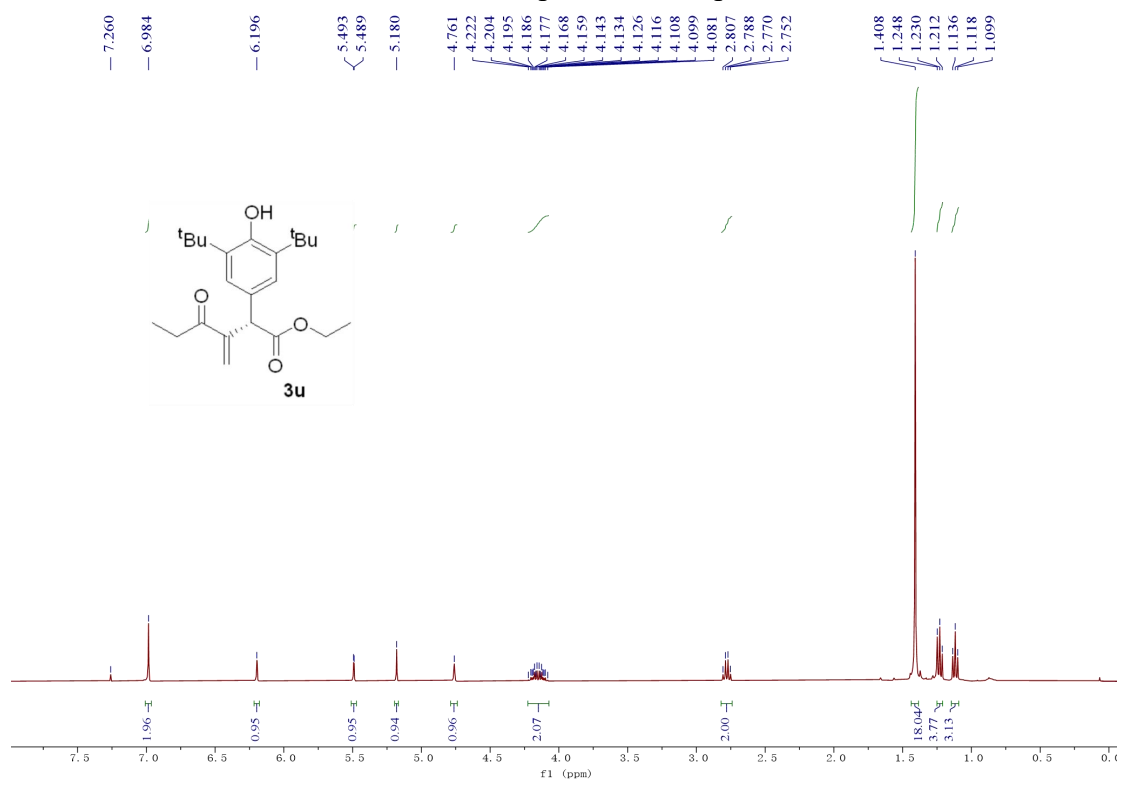

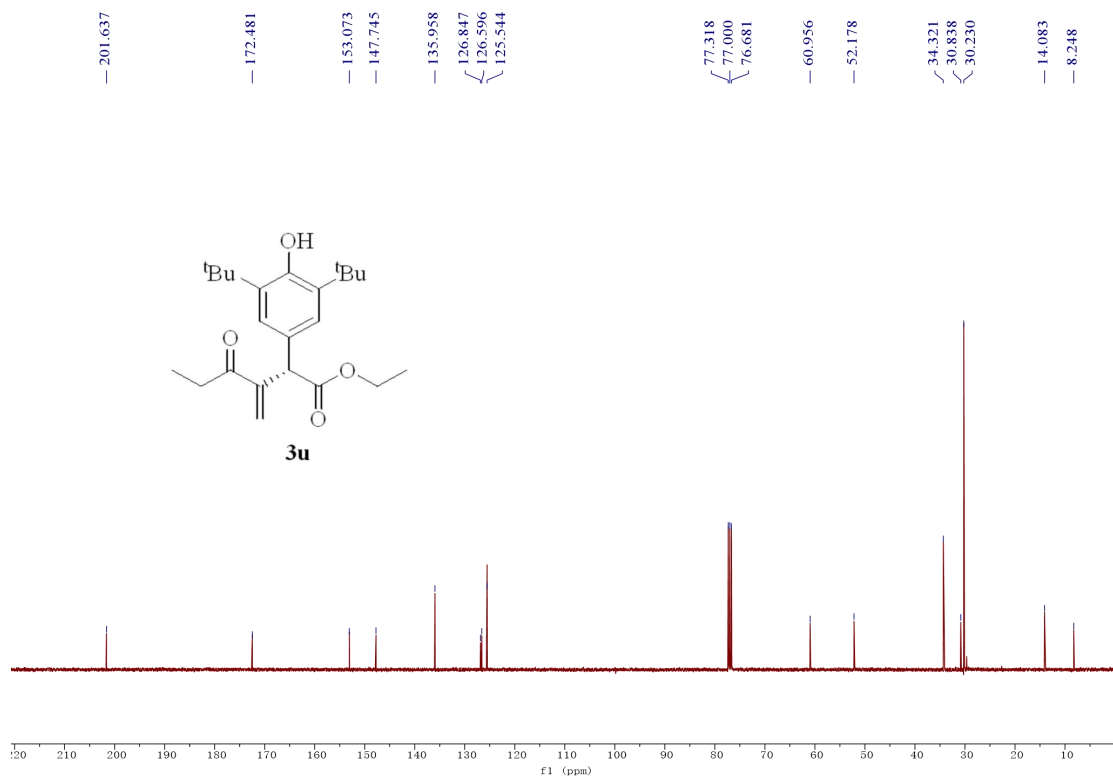

<sup>1</sup>H and <sup>13</sup>C NMR spectra of compound **3u**

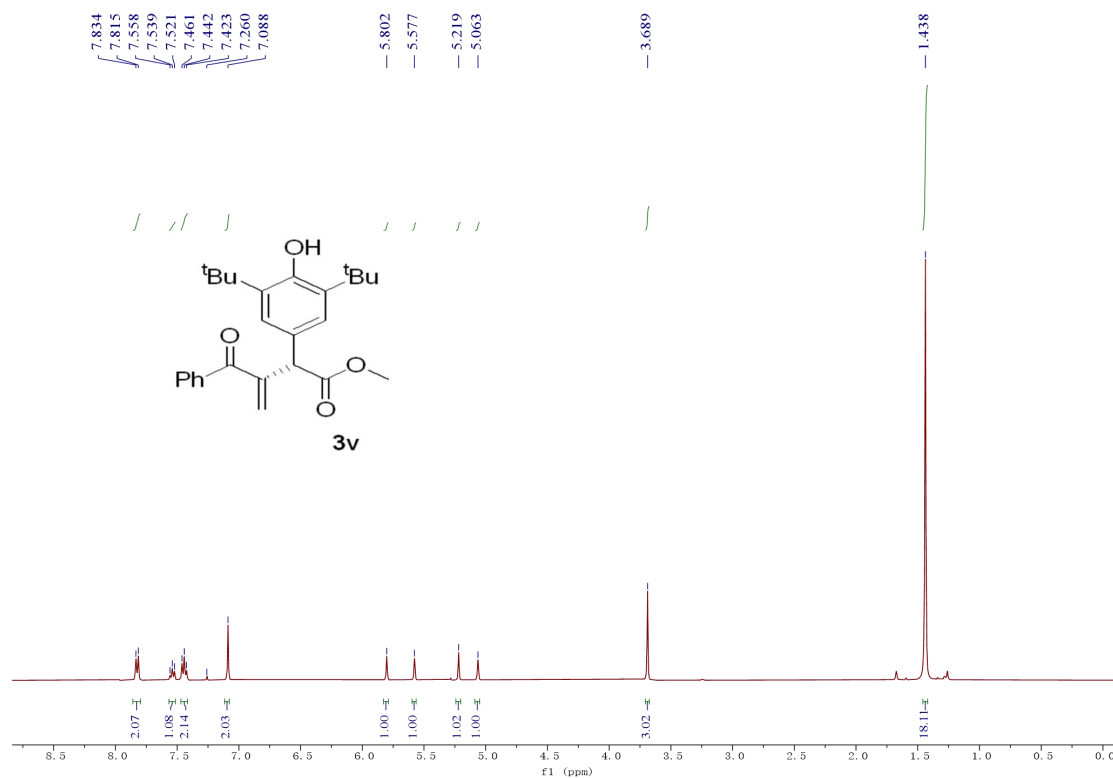

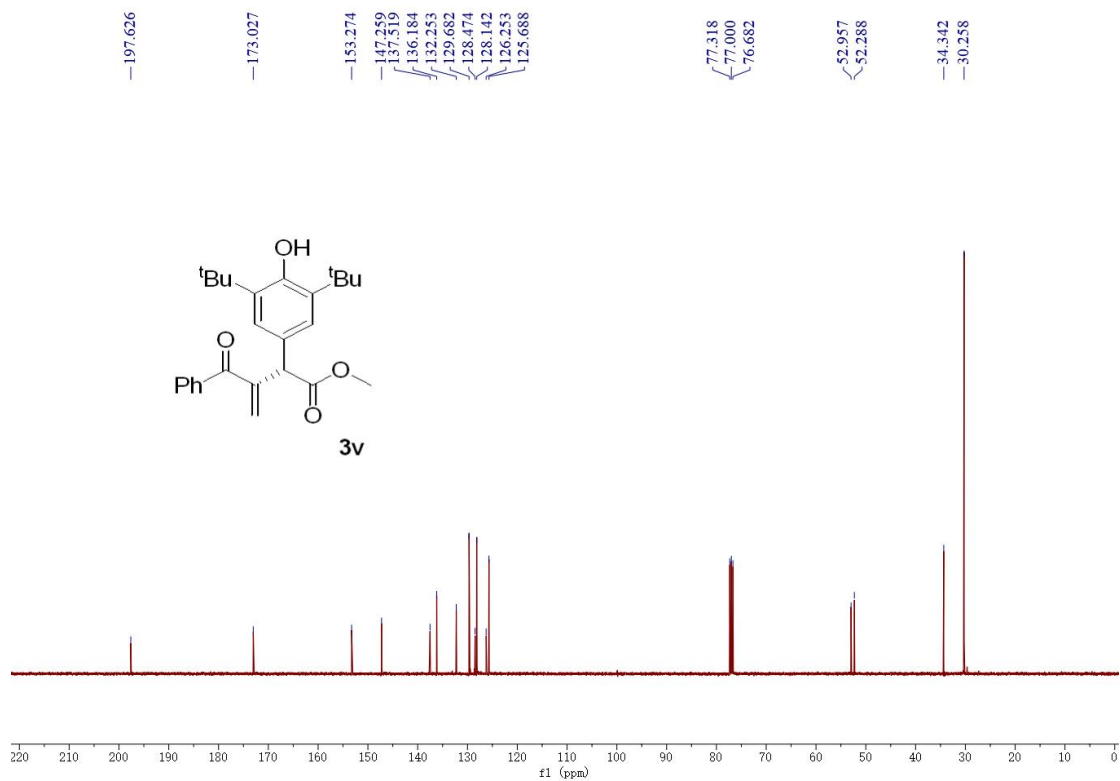

<sup>1</sup>H and <sup>13</sup>C NMR spectra of compound **3v**

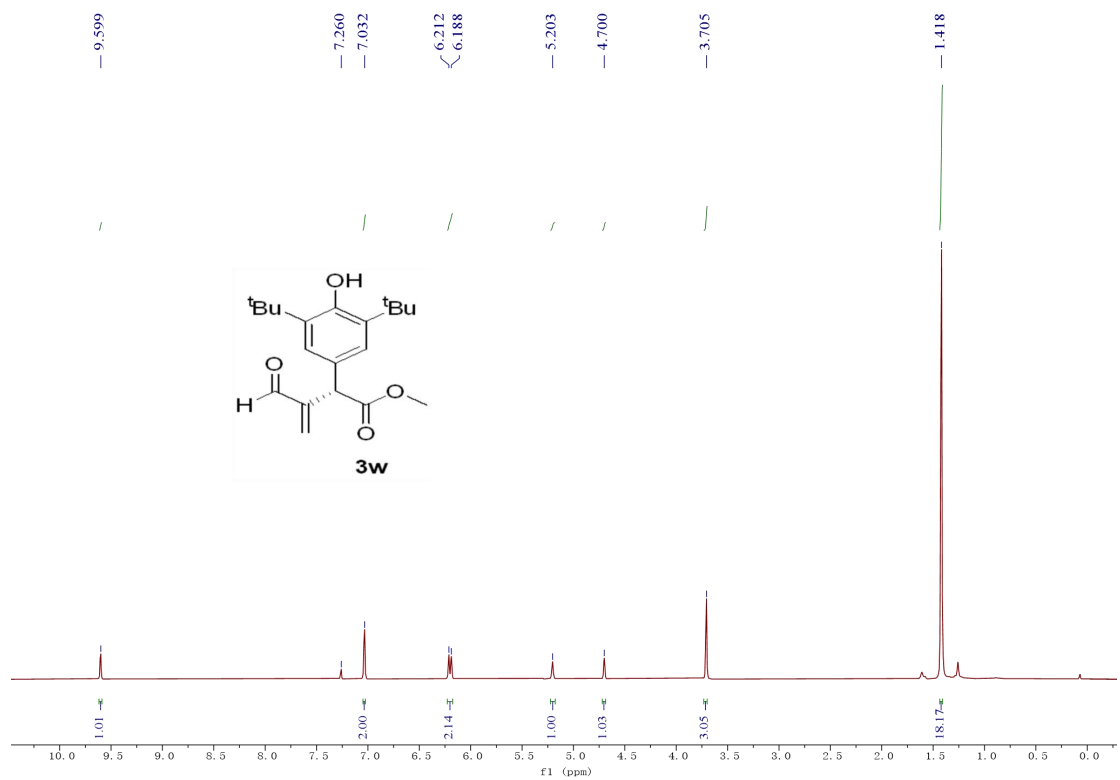

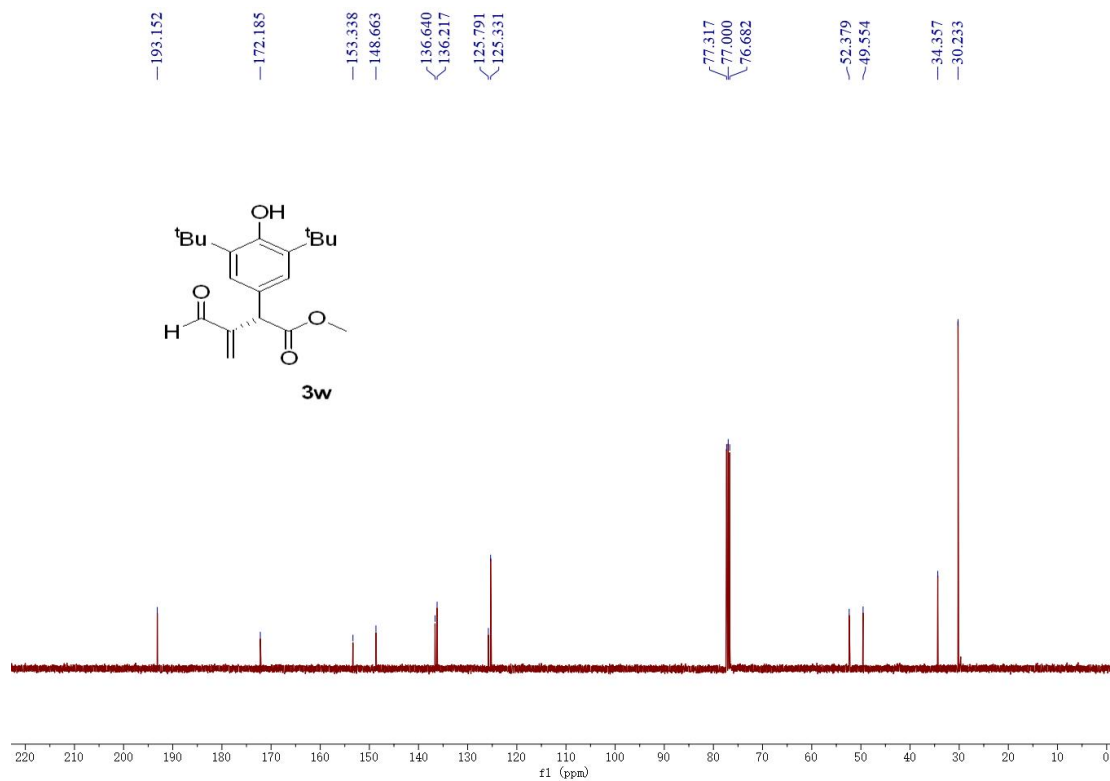

**<sup>1</sup>H and <sup>13</sup>C NMR spectra of compound 3w**

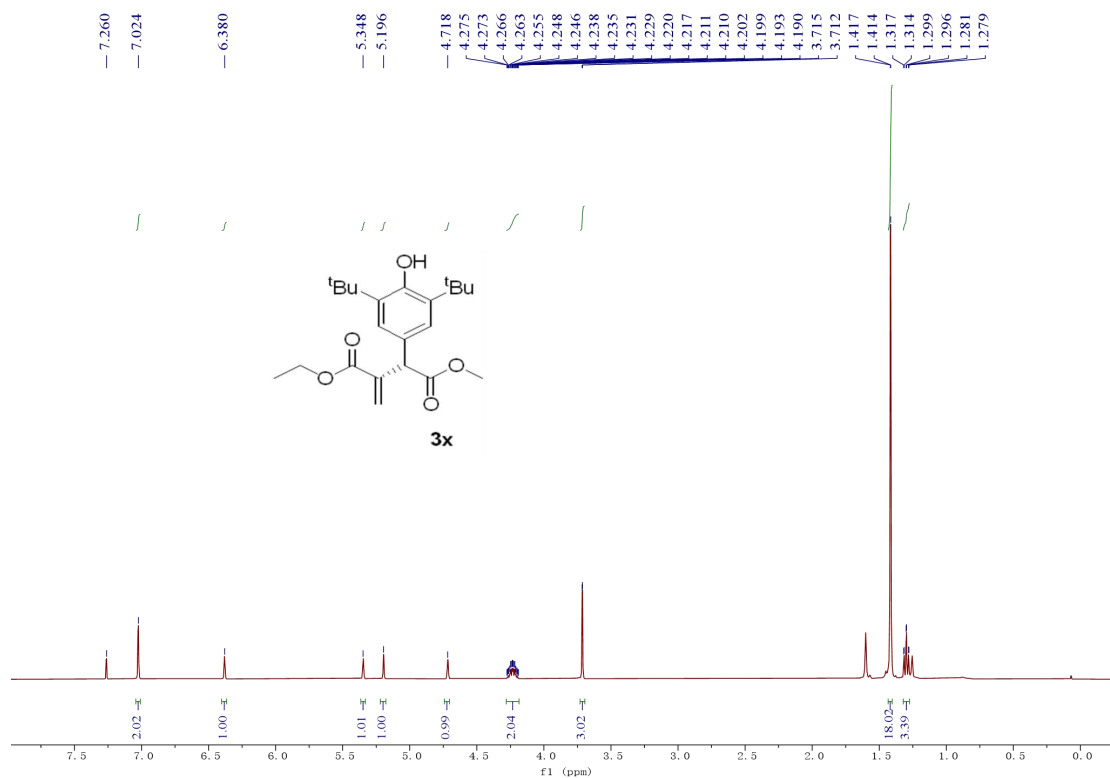

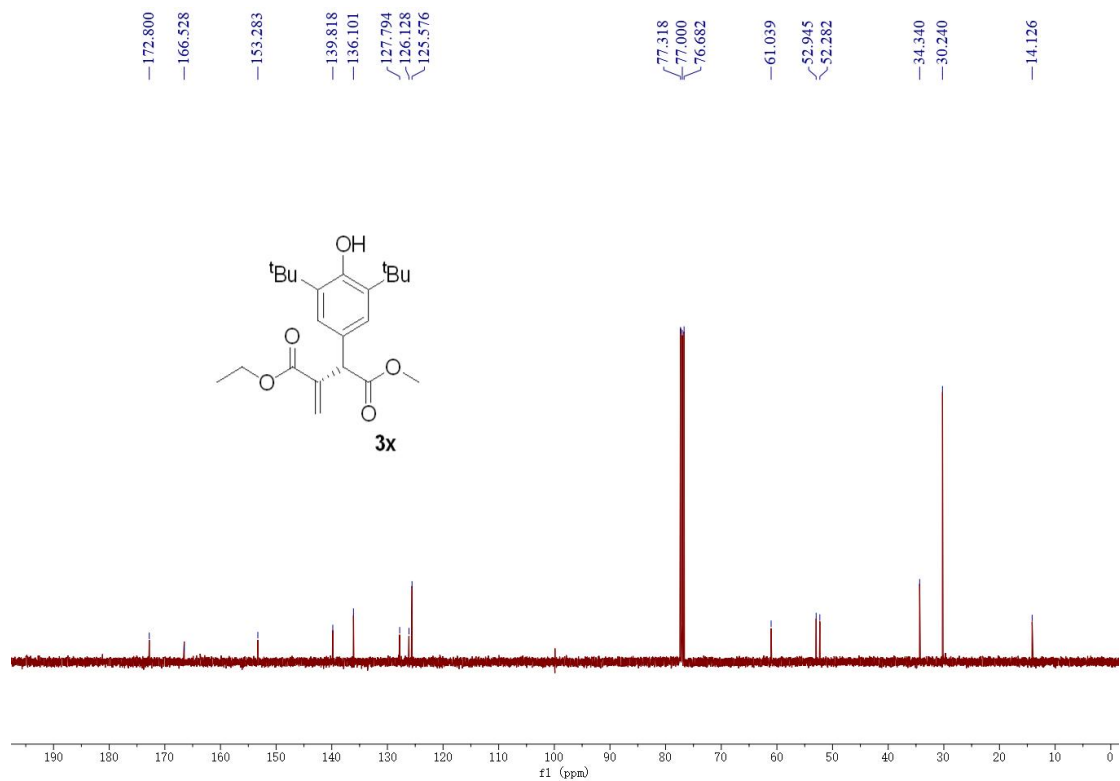

<sup>1</sup>H and <sup>13</sup>C NMR spectra of compound **3x**

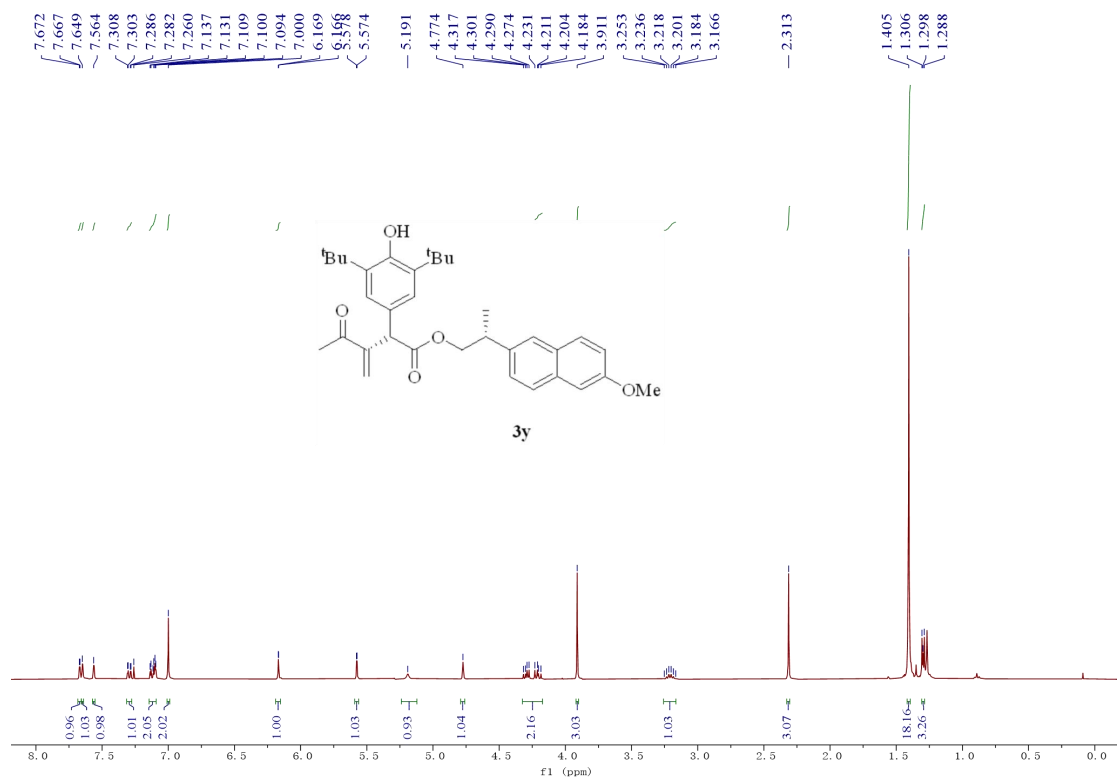



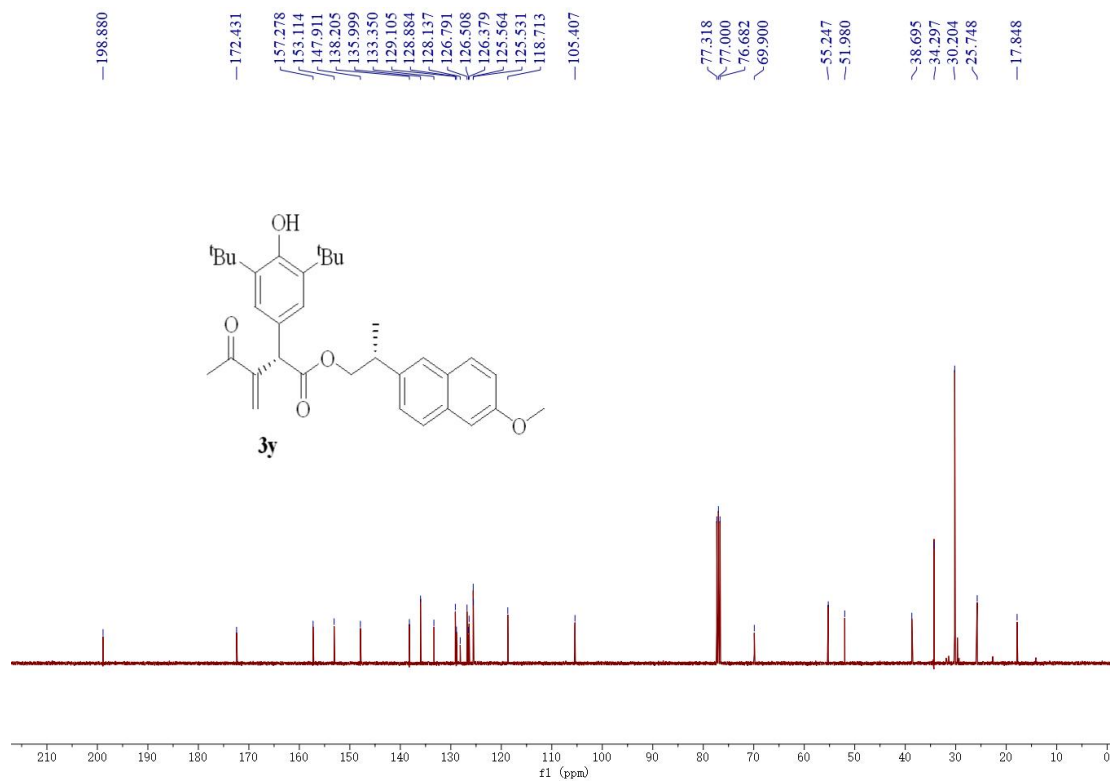

**<sup>1</sup>H and <sup>13</sup>C NMR spectra of compound 3y**

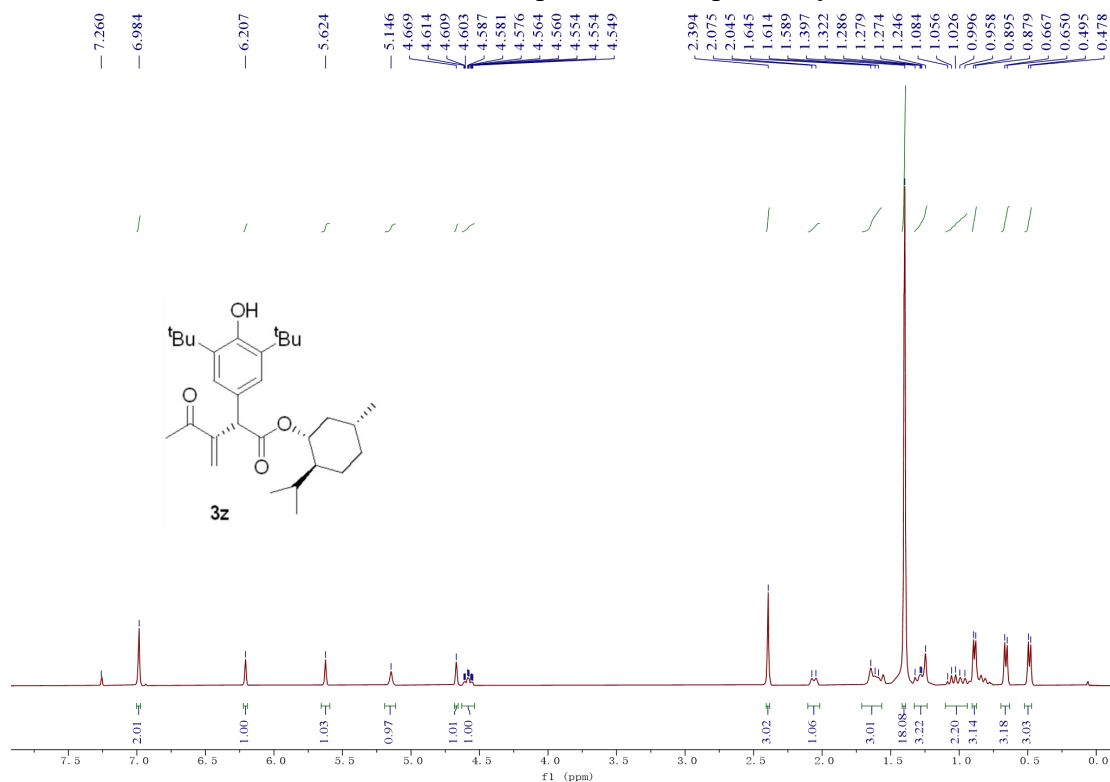

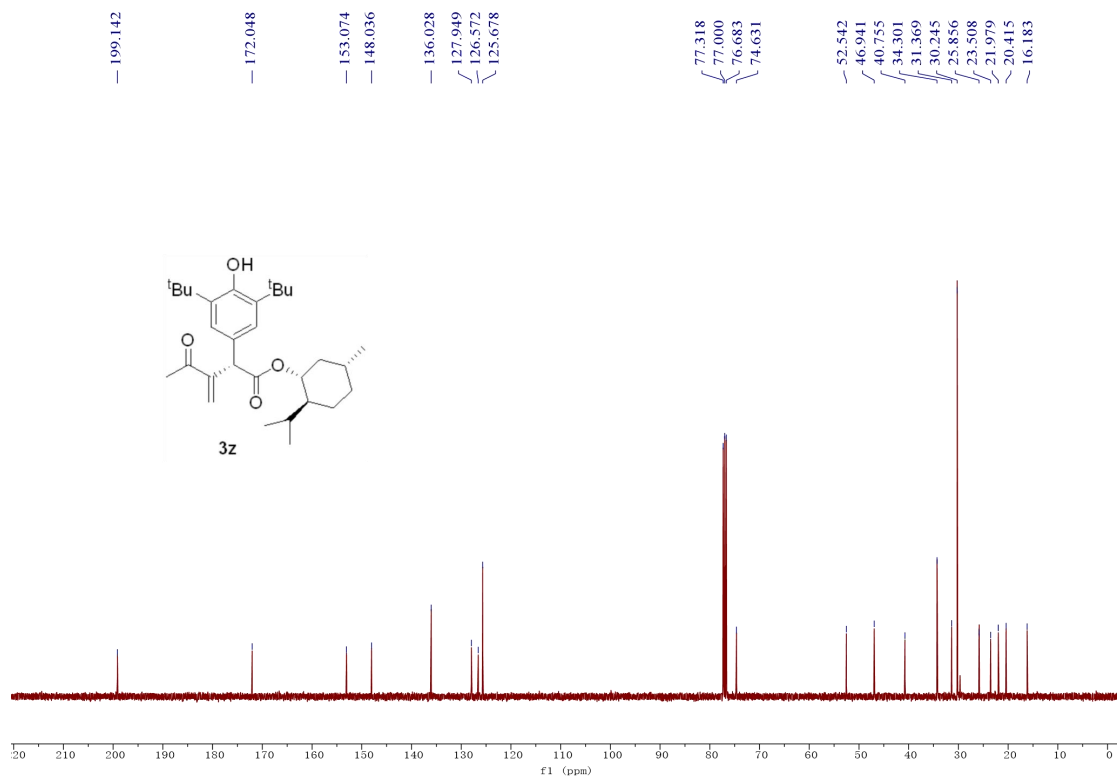

$^1\text{H}$  and  $^{13}\text{C}$  NMR spectra of compound **3z**

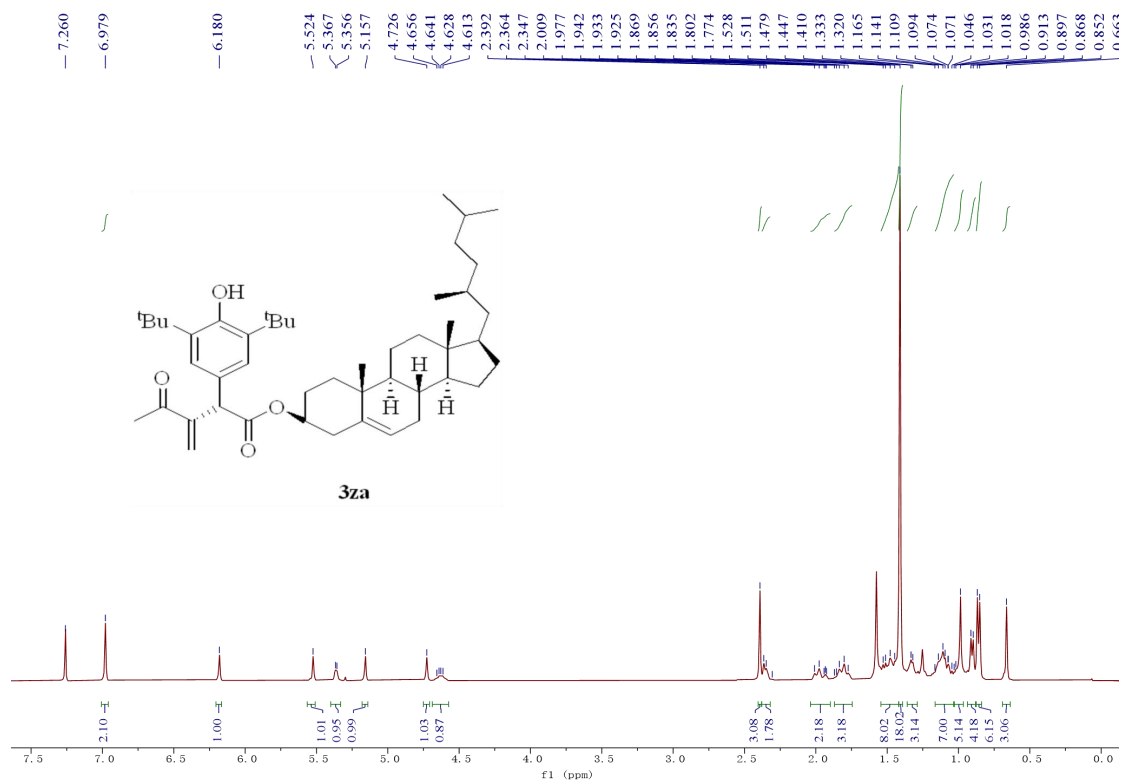

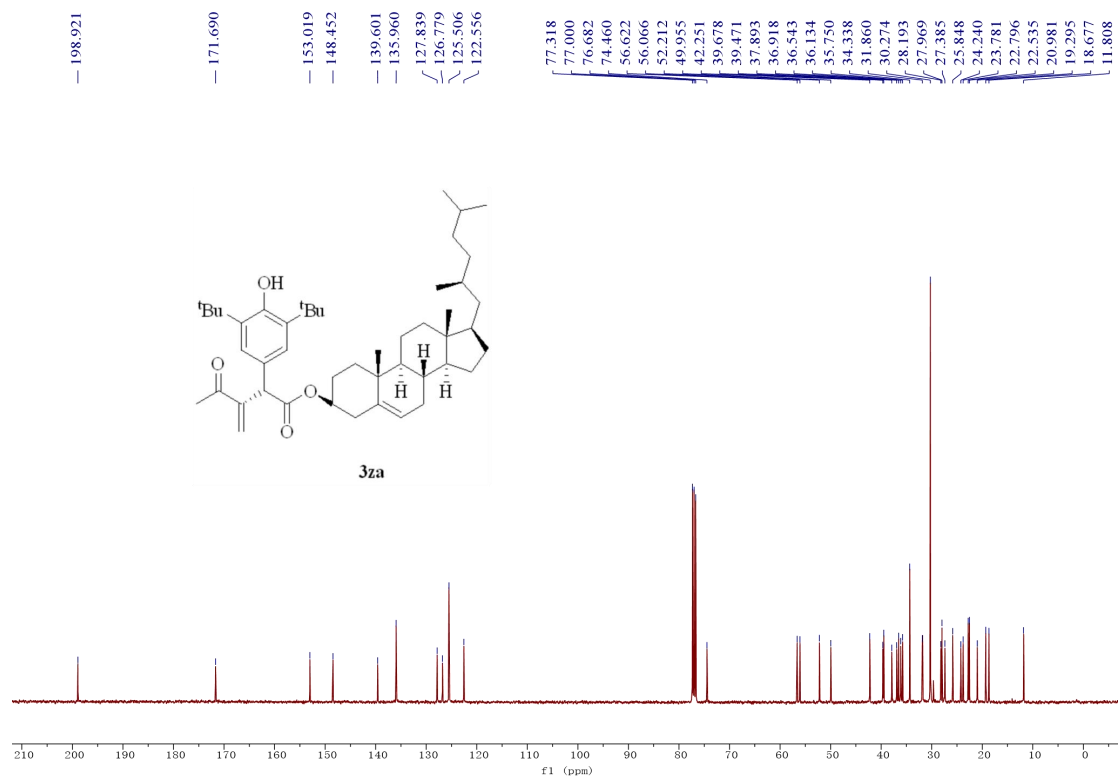

$^1\text{H}$  and  $^{13}\text{C}$  NMR spectra of compound **3za**

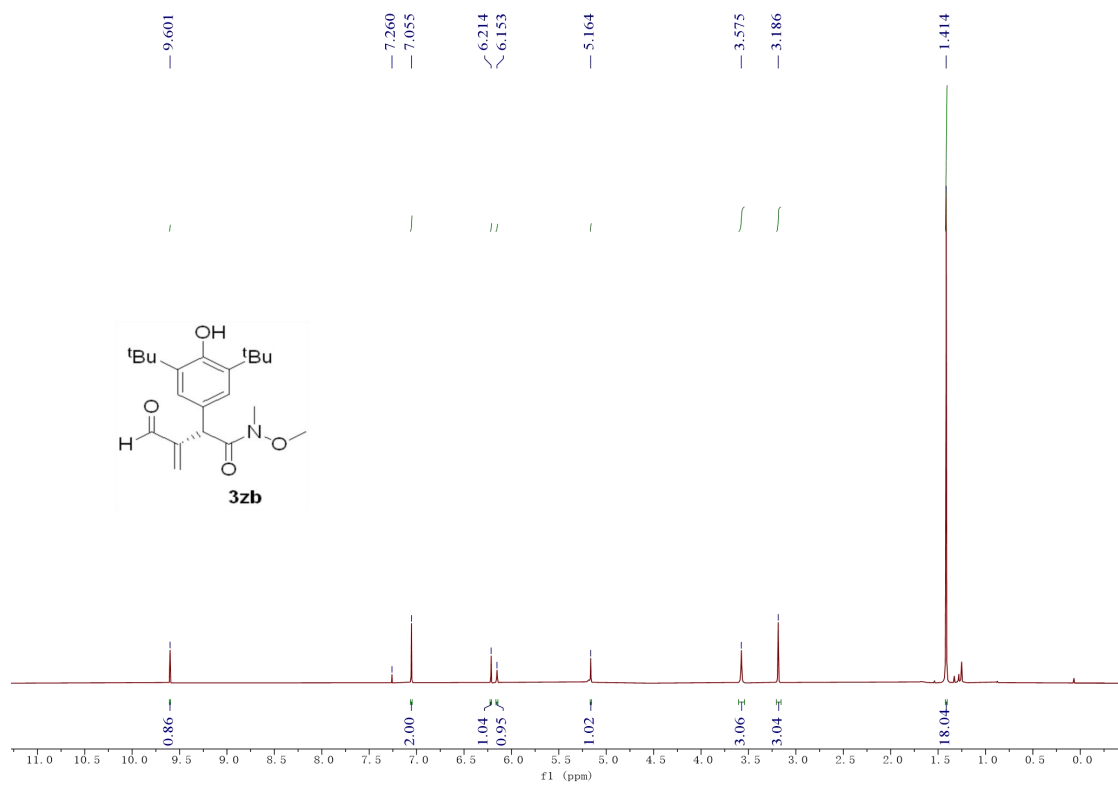

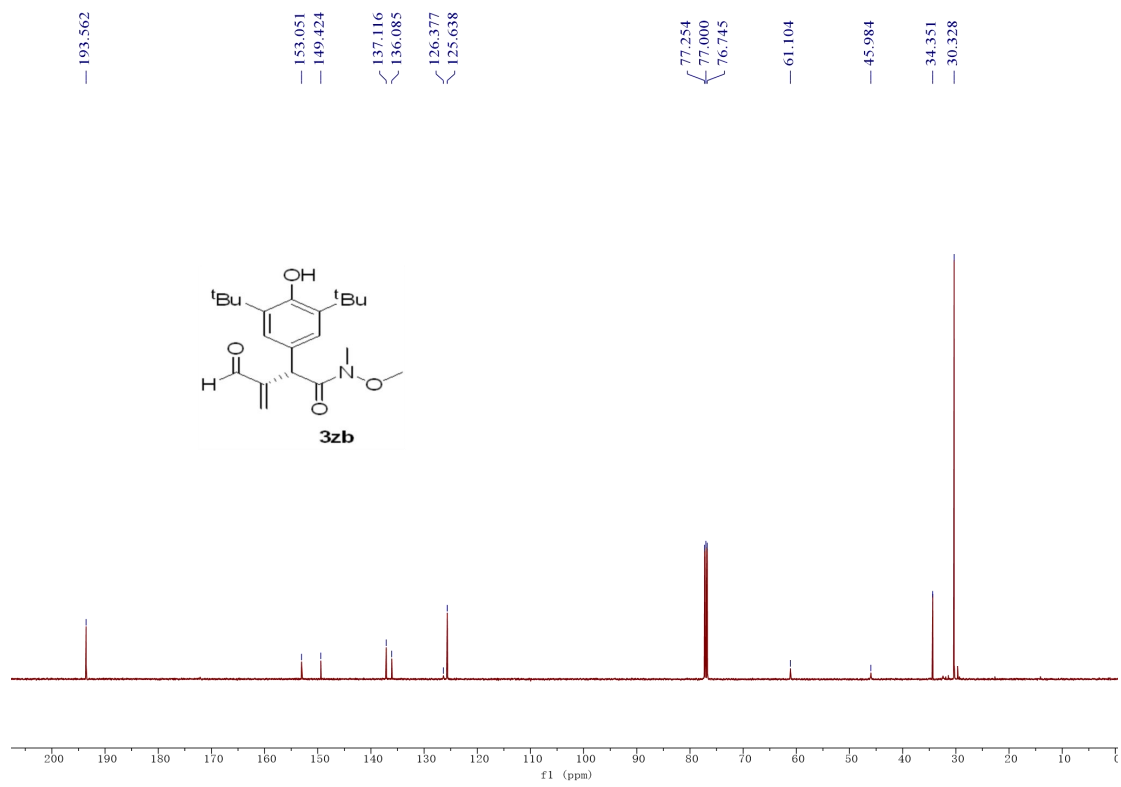

<sup>1</sup>H and <sup>13</sup>C NMR spectra of compound **3zb**

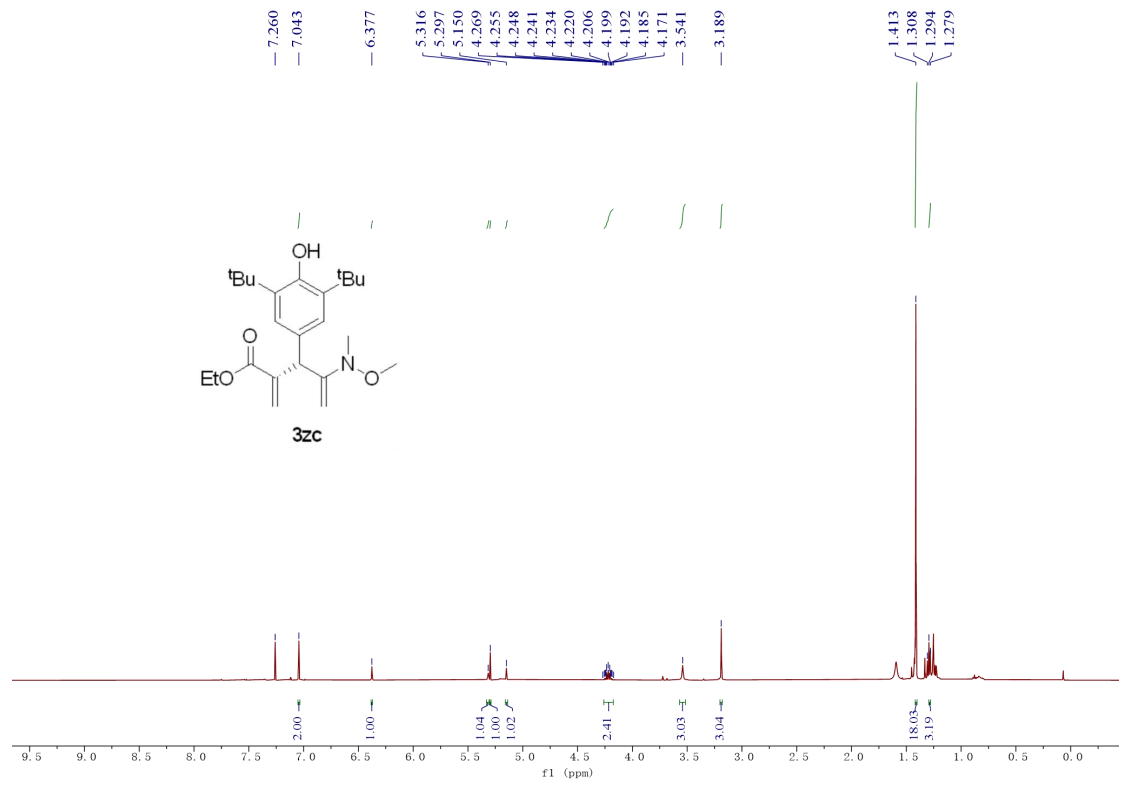

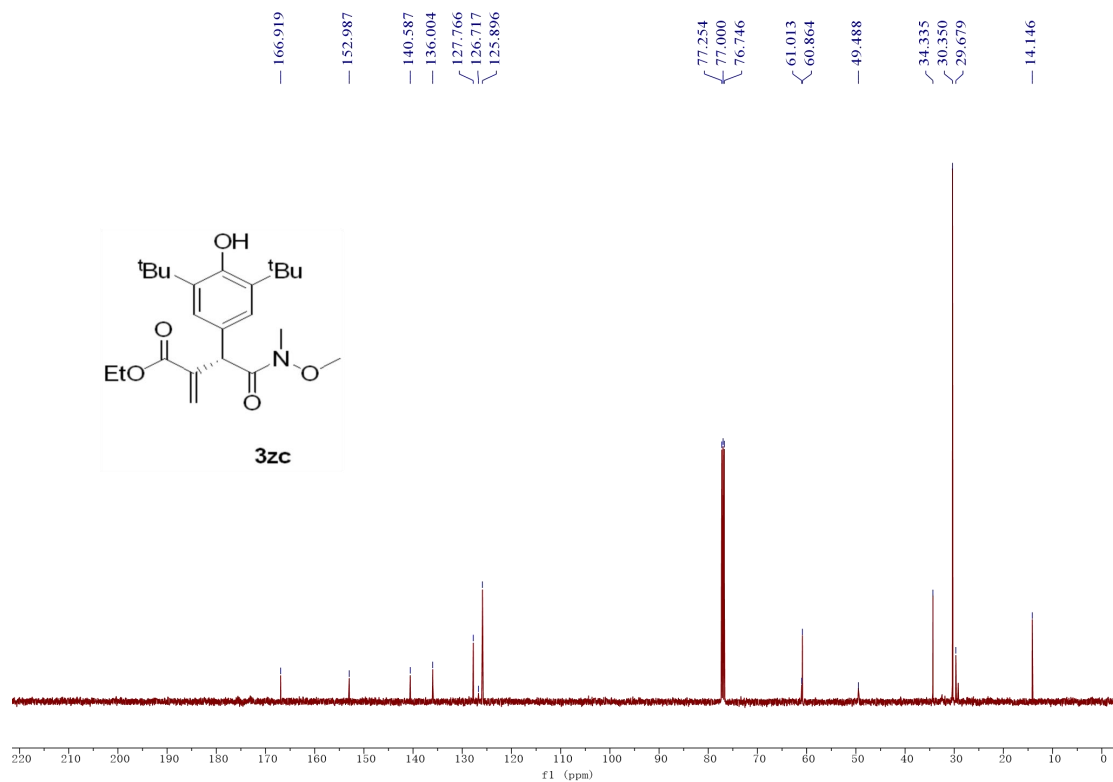

<sup>1</sup>H and <sup>13</sup>C NMR spectra of compound **3zc**

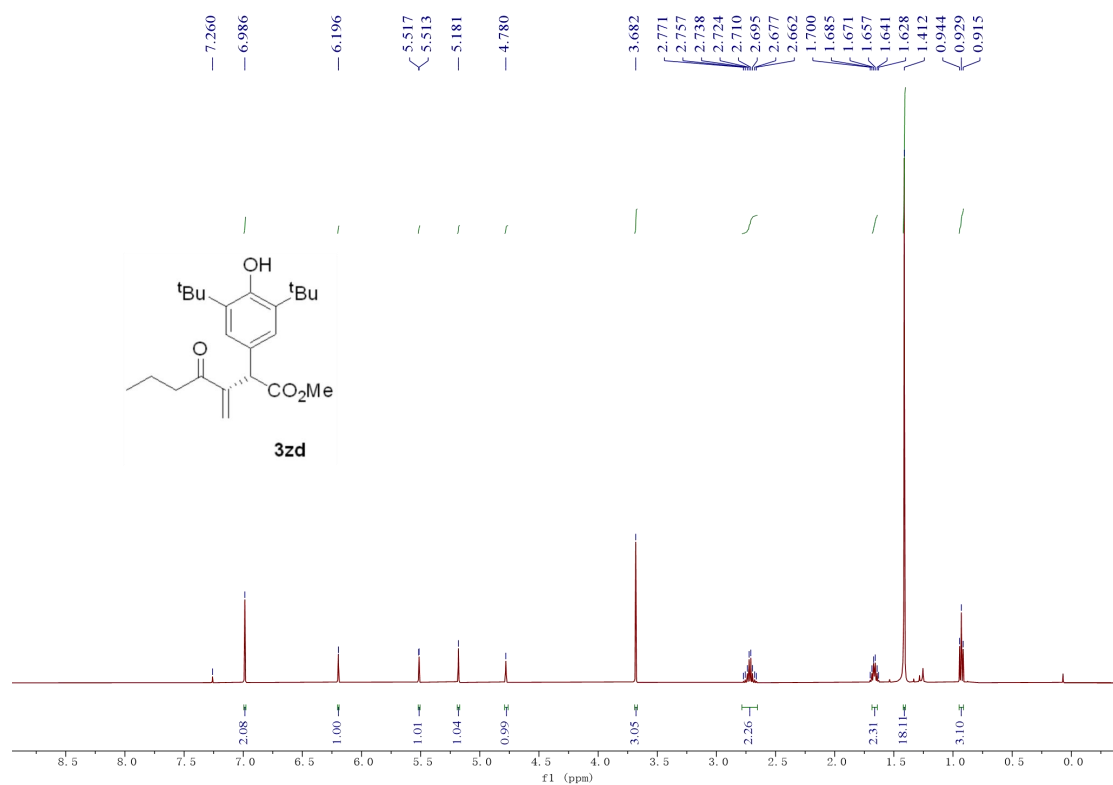

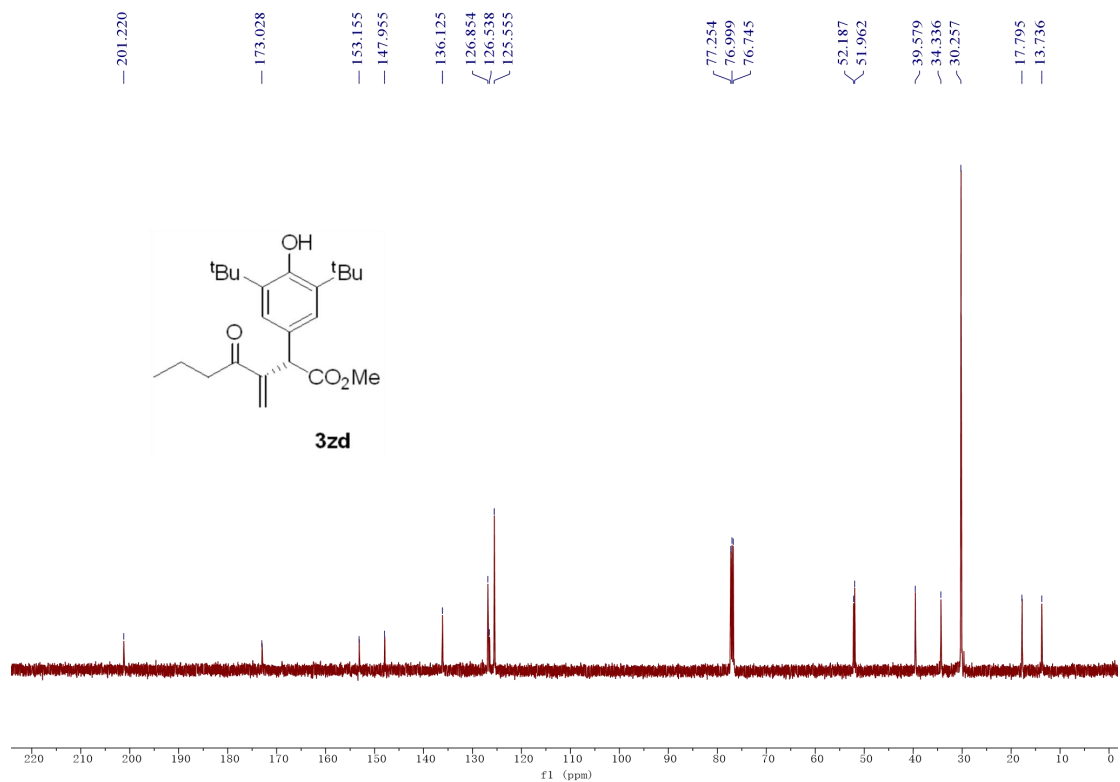

<sup>1</sup>H and <sup>13</sup>C NMR spectra of compound **3zd**

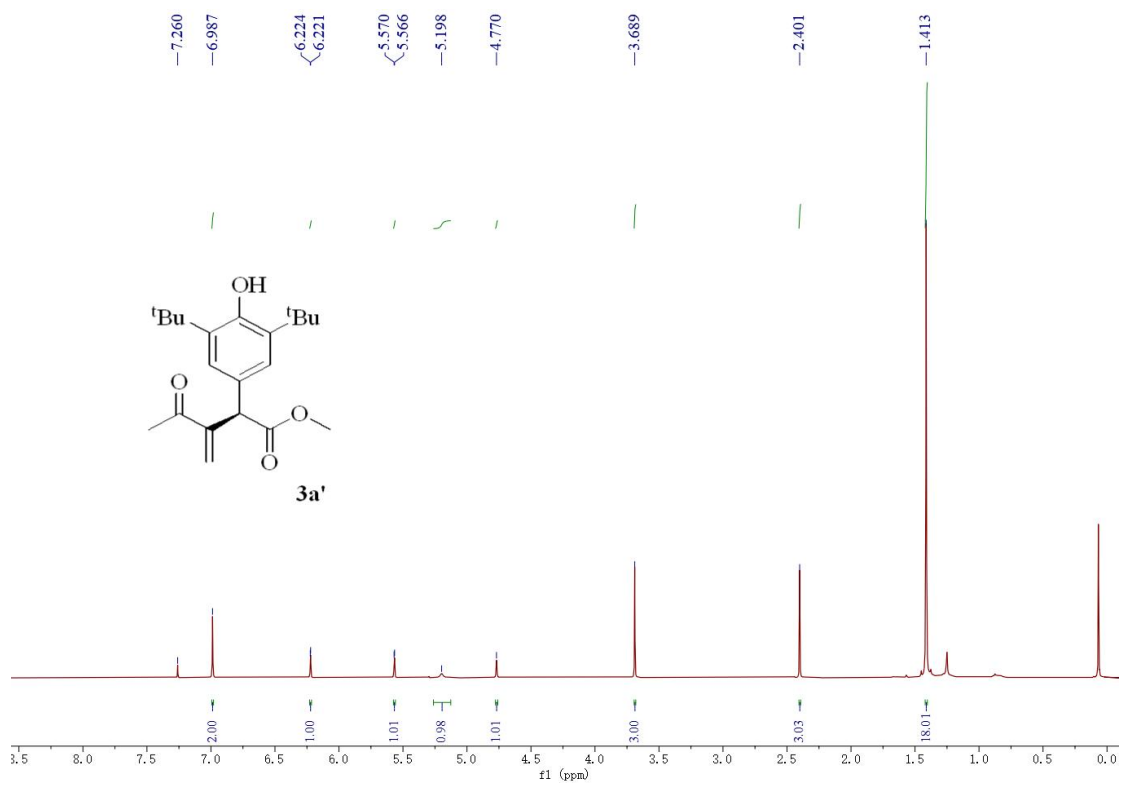

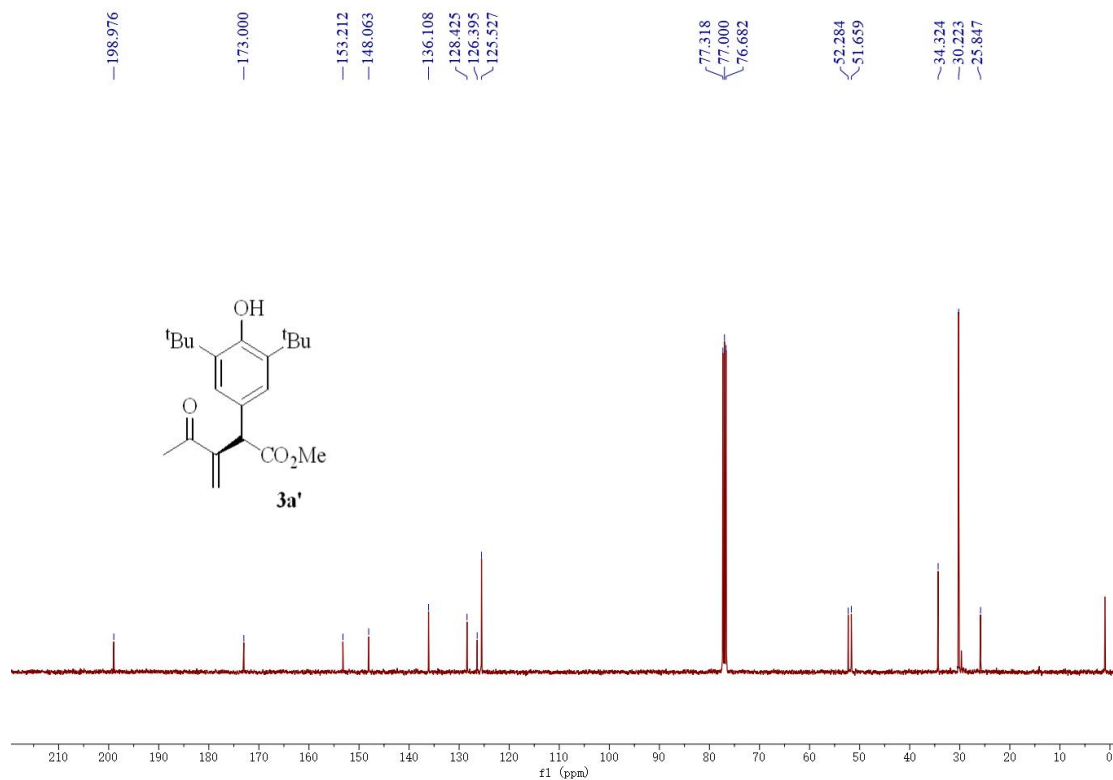

<sup>1</sup>H and <sup>13</sup>C NMR spectra of compound **3a'**

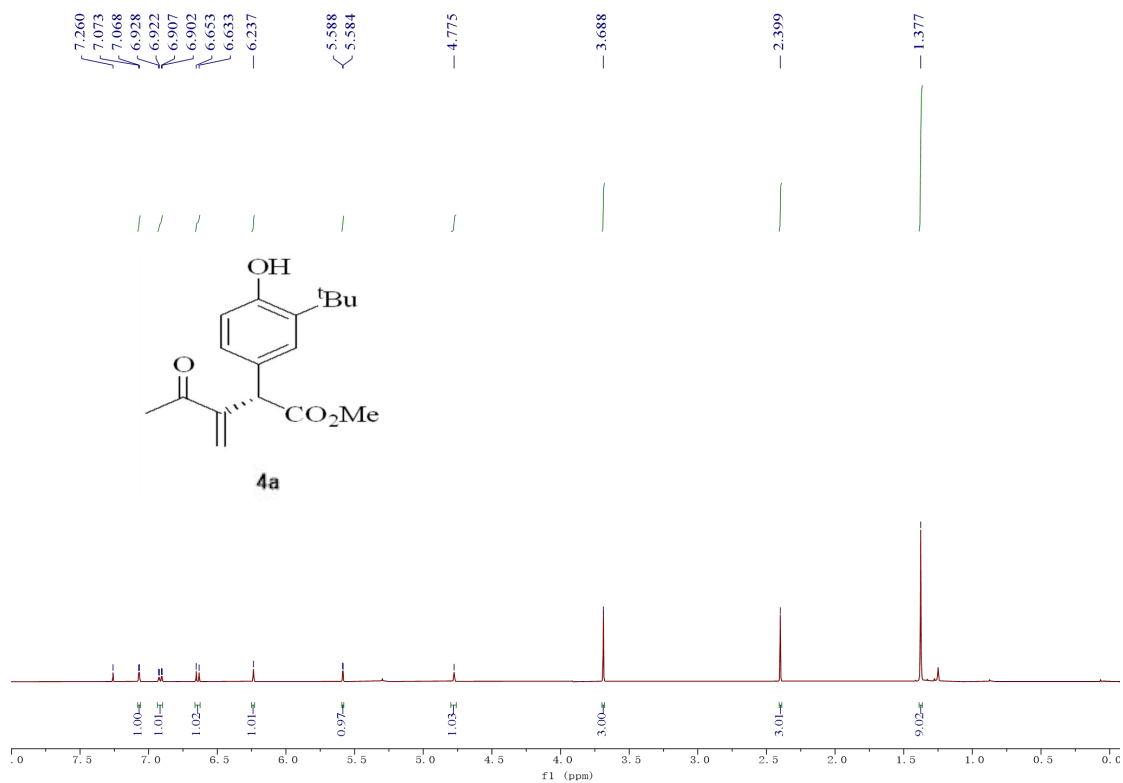

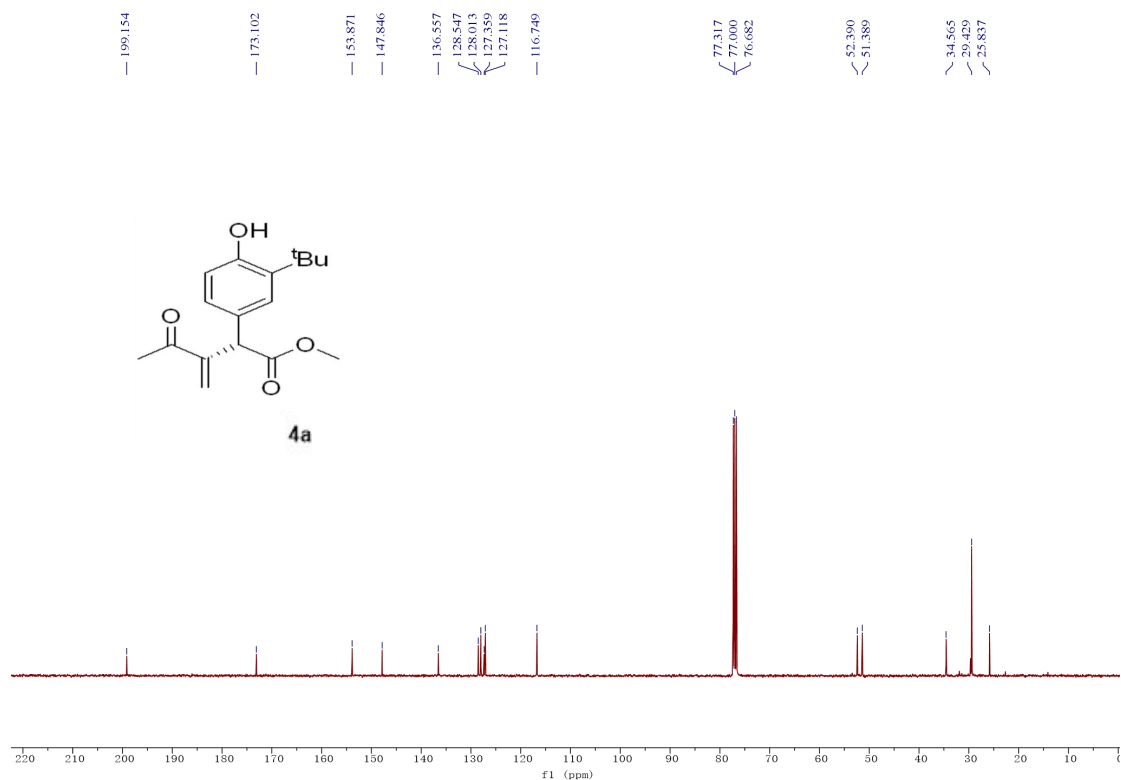

<sup>1</sup>H and <sup>13</sup>C NMR spectra of compound **4a**

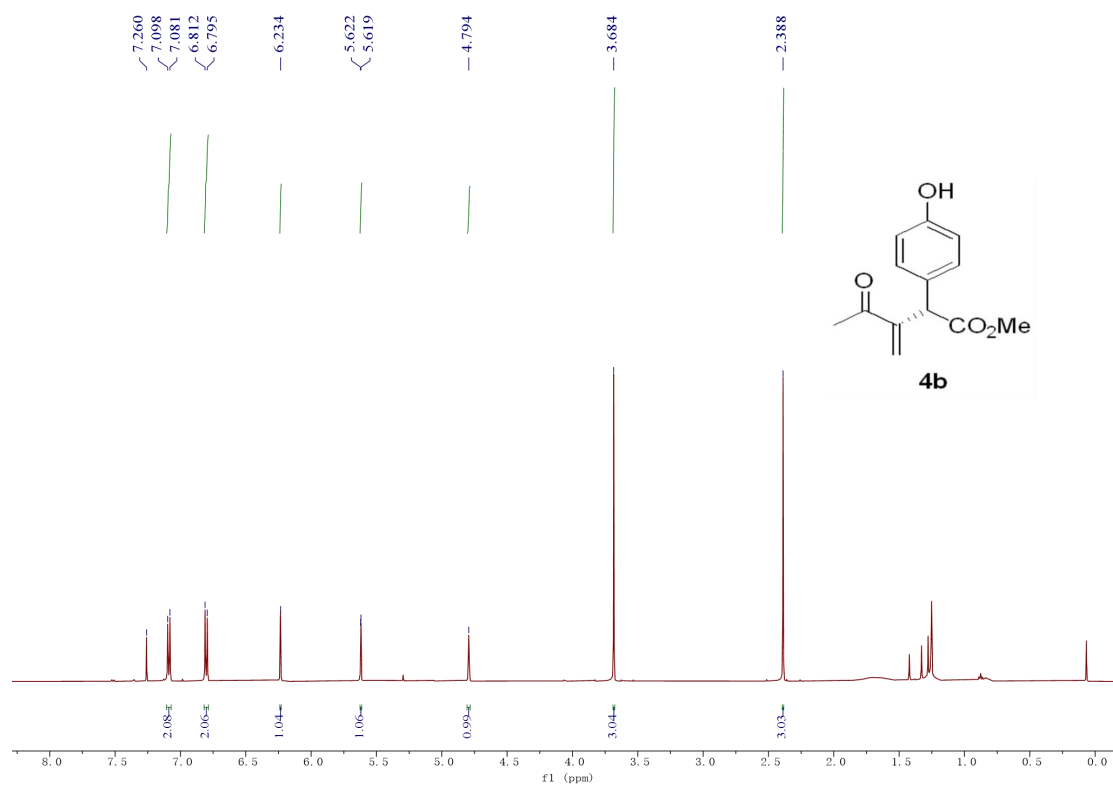



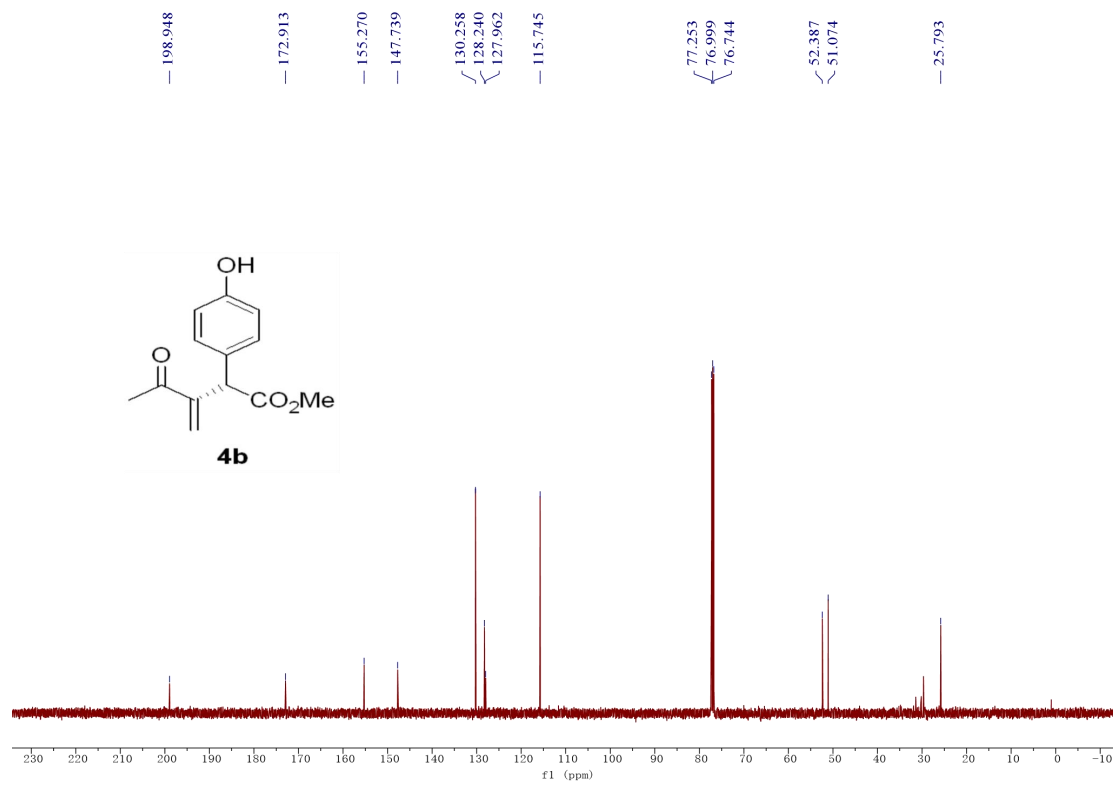

<sup>1</sup>H and <sup>13</sup>C NMR spectra of compound **4b**

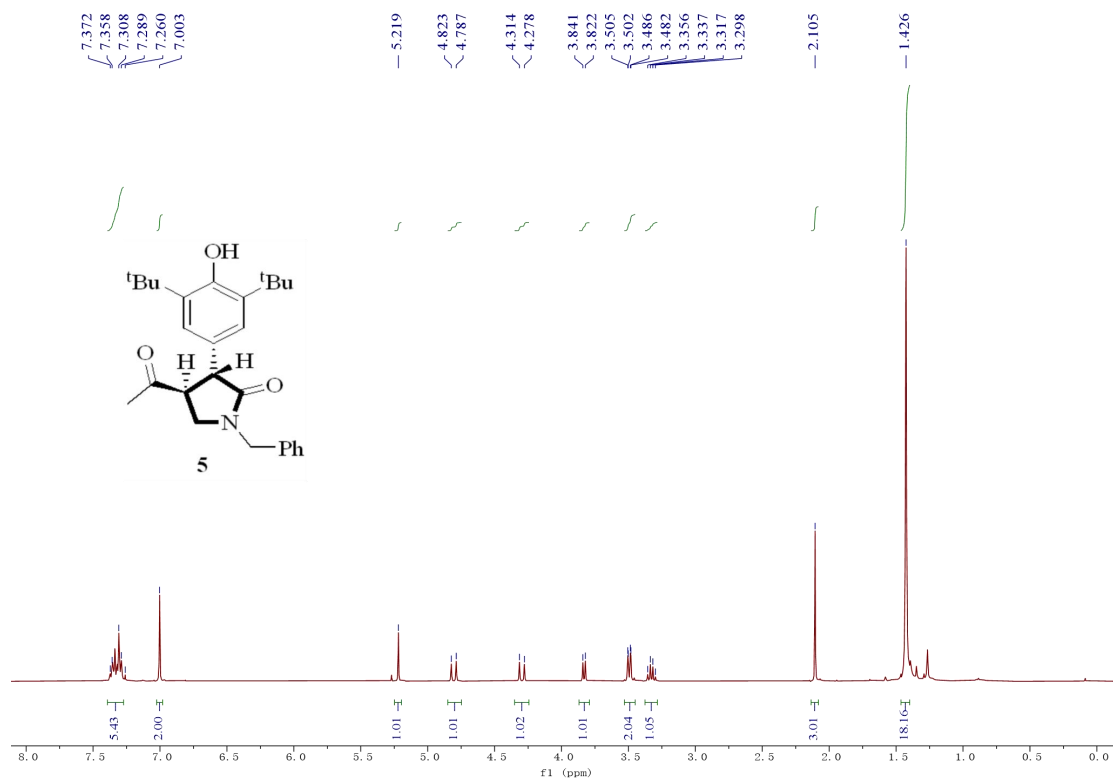

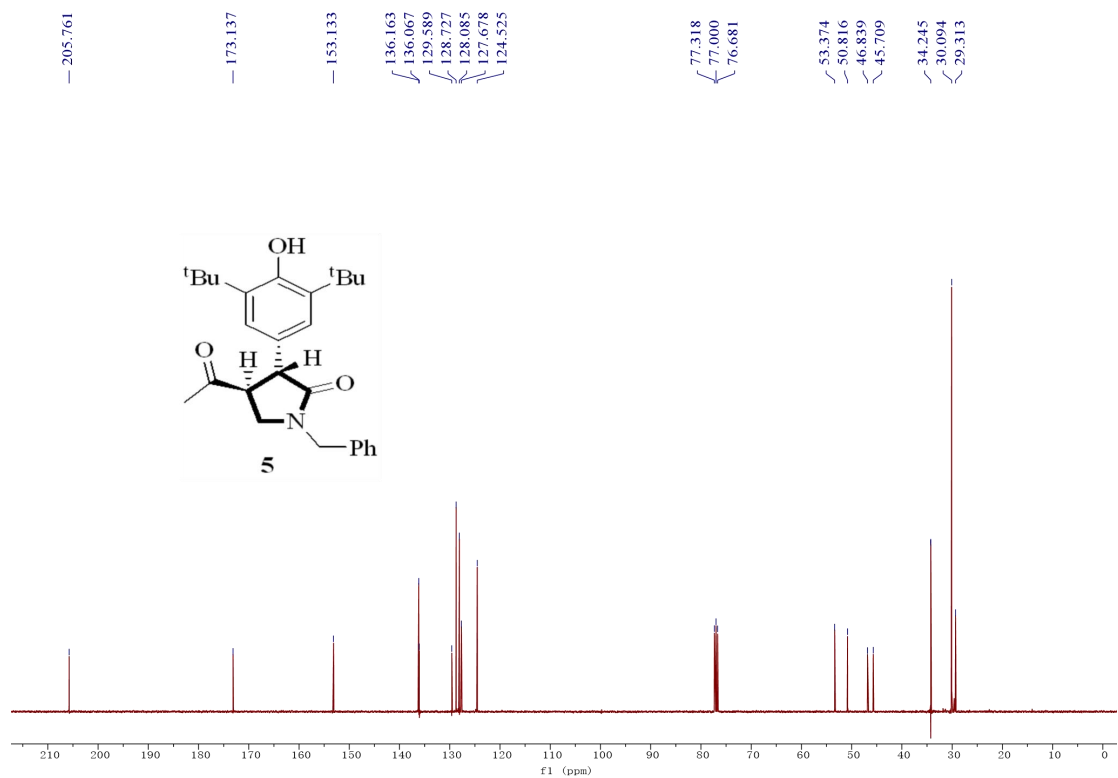

$^1\text{H}$  and  $^{13}\text{C}$  NMR spectra of compound **5**

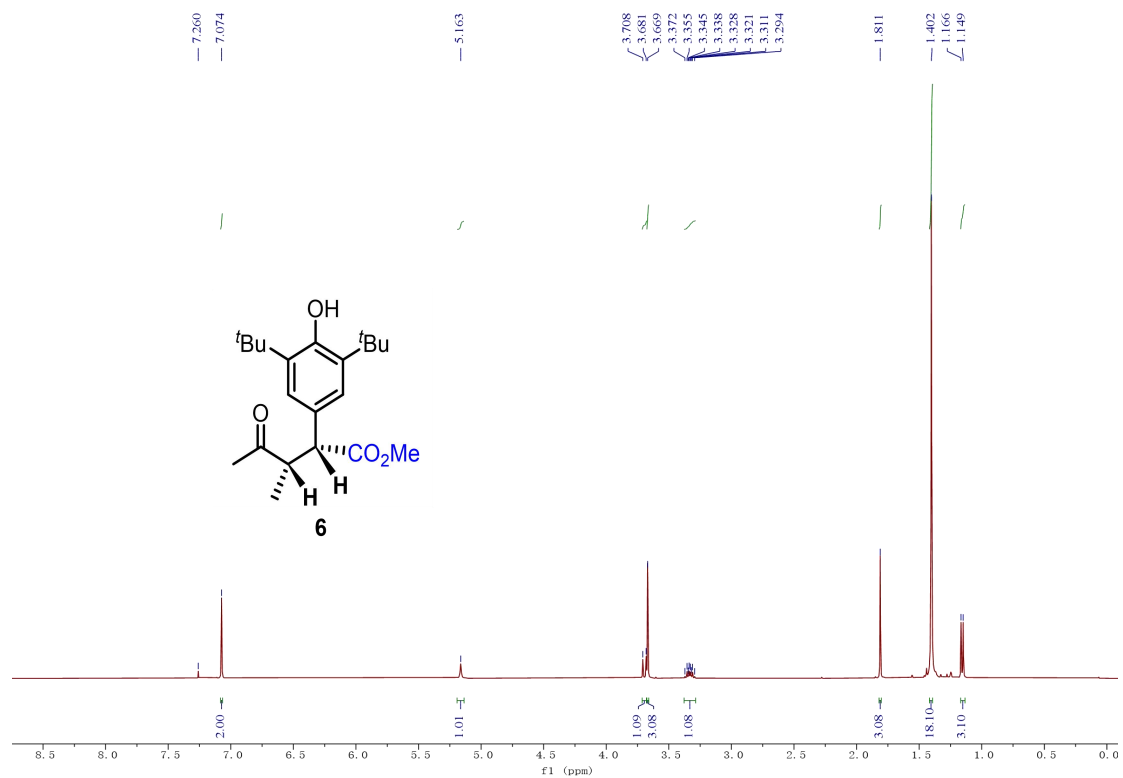

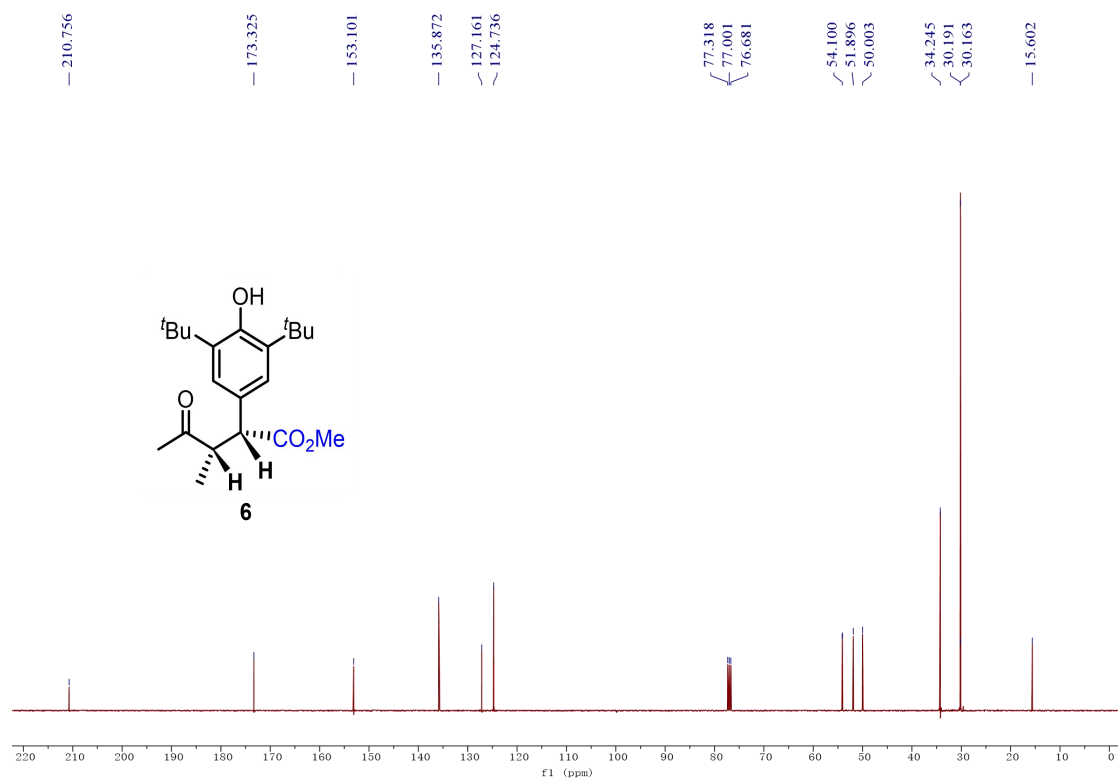

$^1\text{H}$  and  $^{13}\text{C}$  NMR spectra of compound **6**

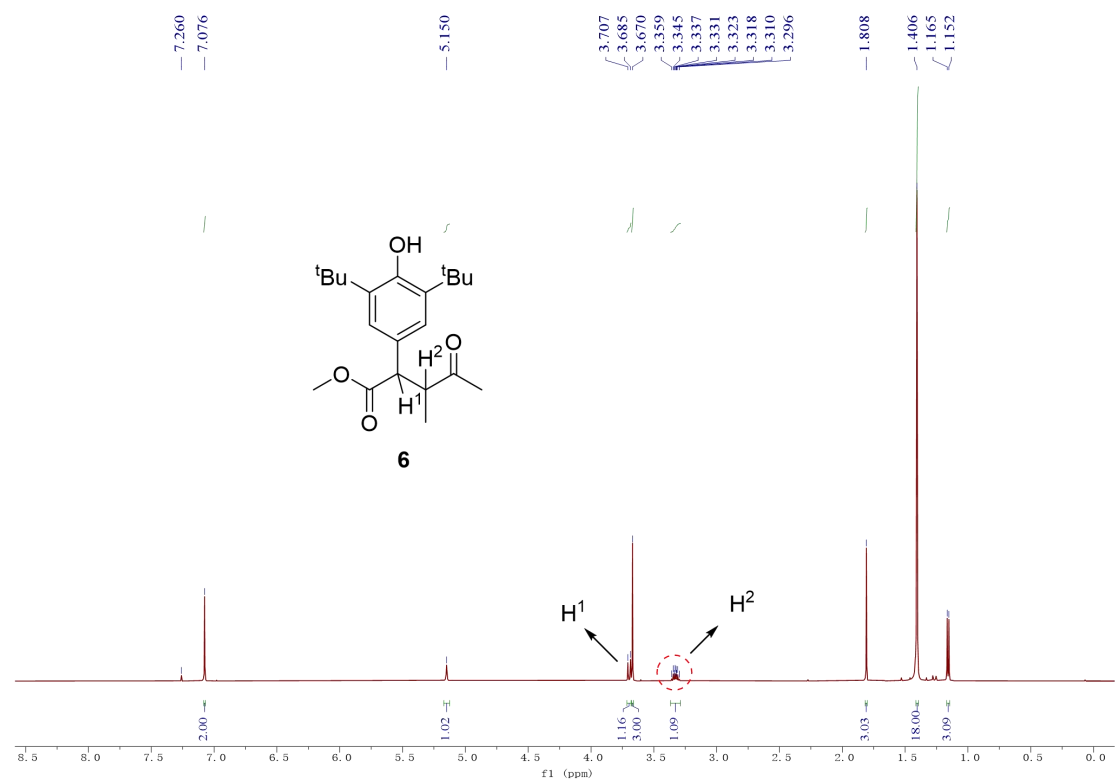

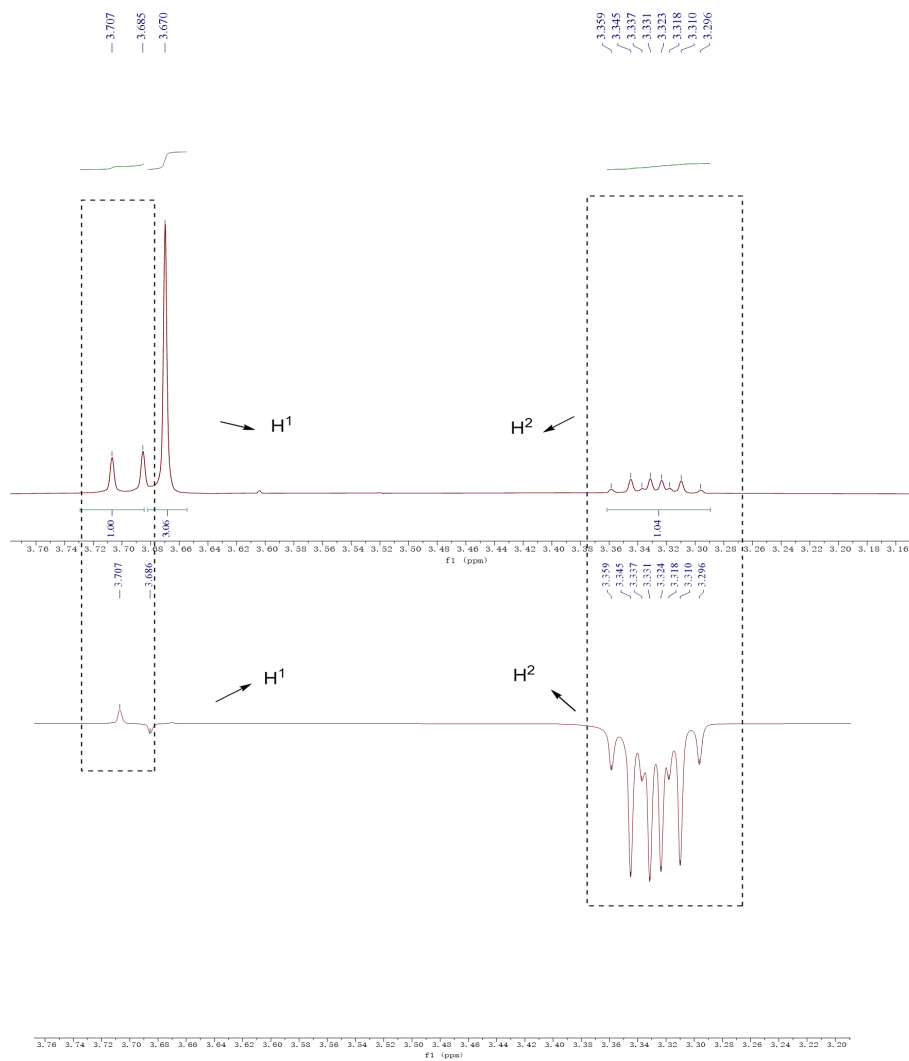

1D NOE of compound 6

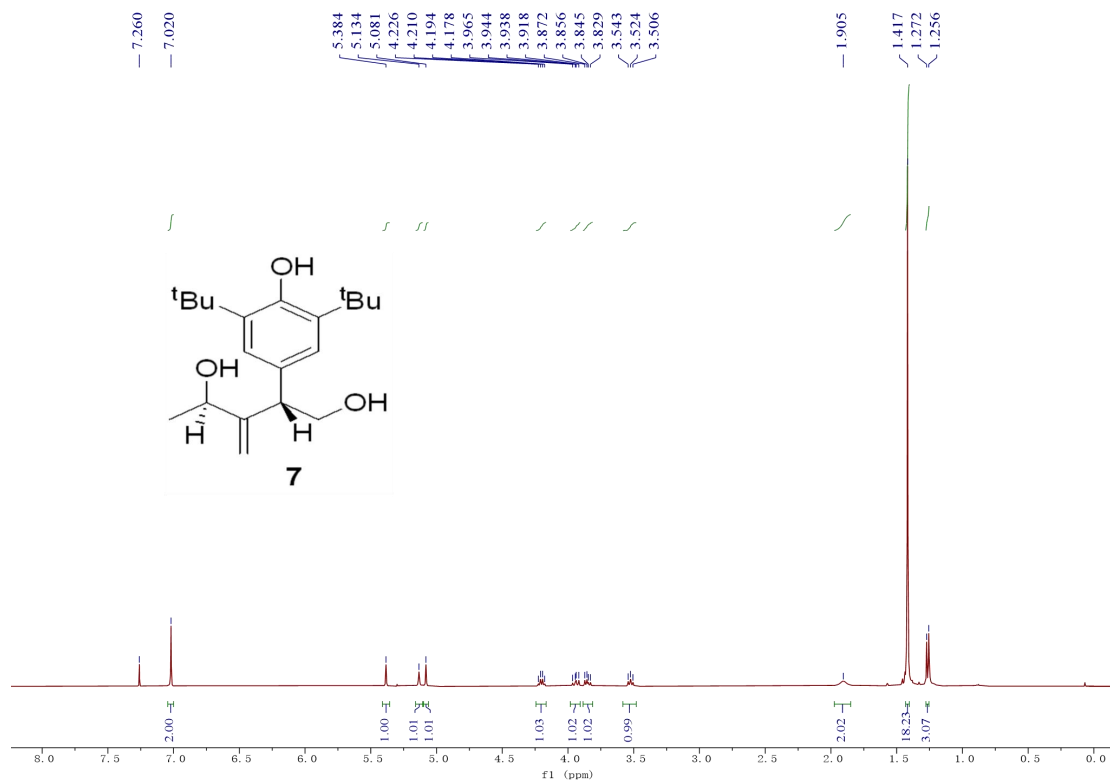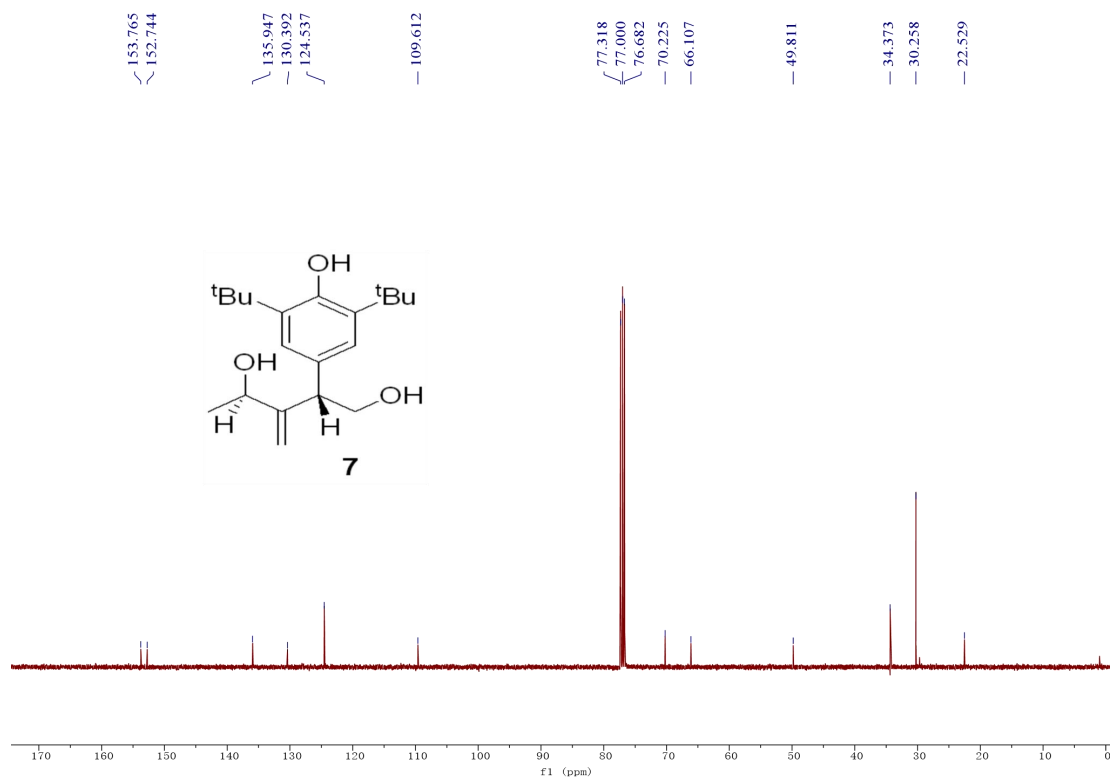

<sup>1</sup>H and <sup>13</sup>C NMR spectra of compound 7

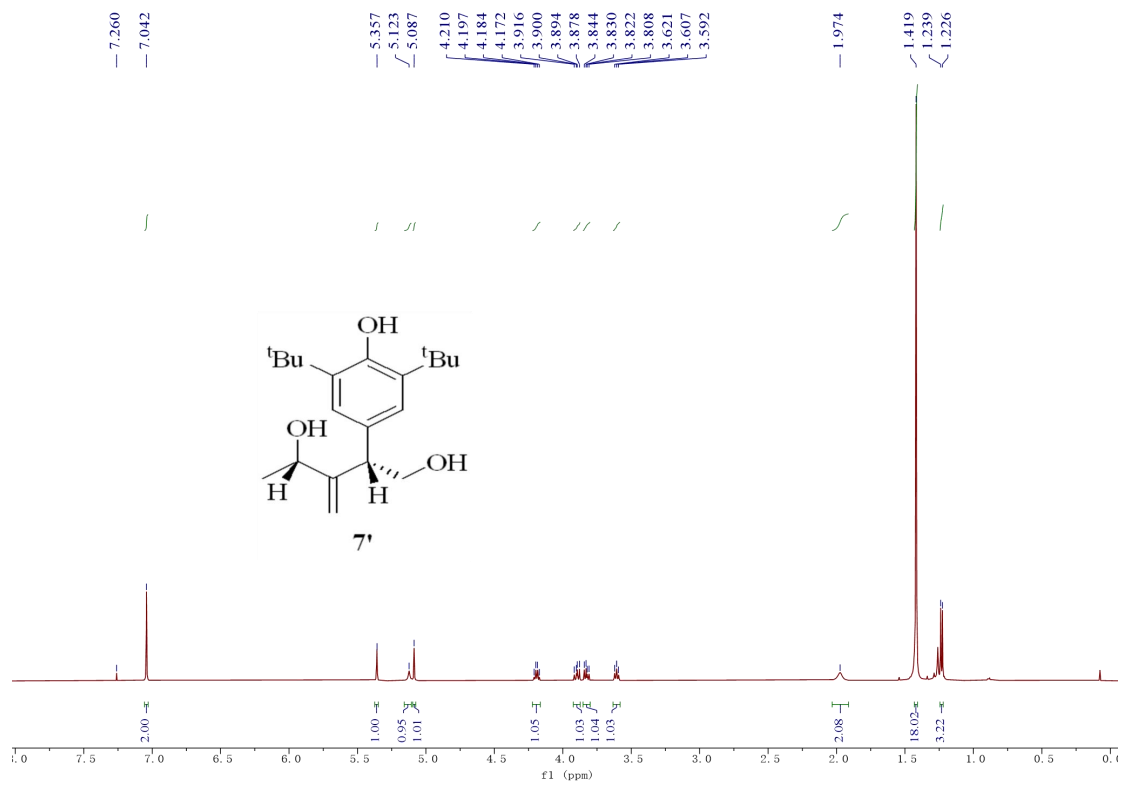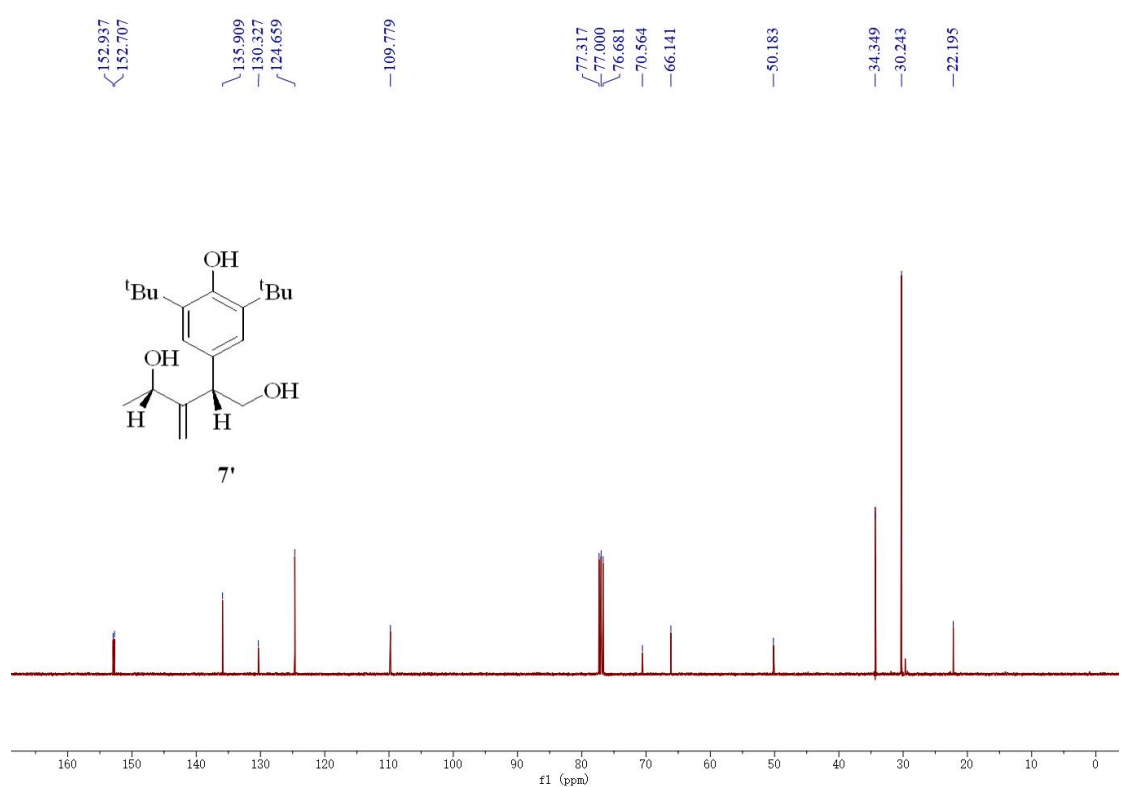

<sup>1</sup>H and <sup>13</sup>C NMR spectra of compound 7'

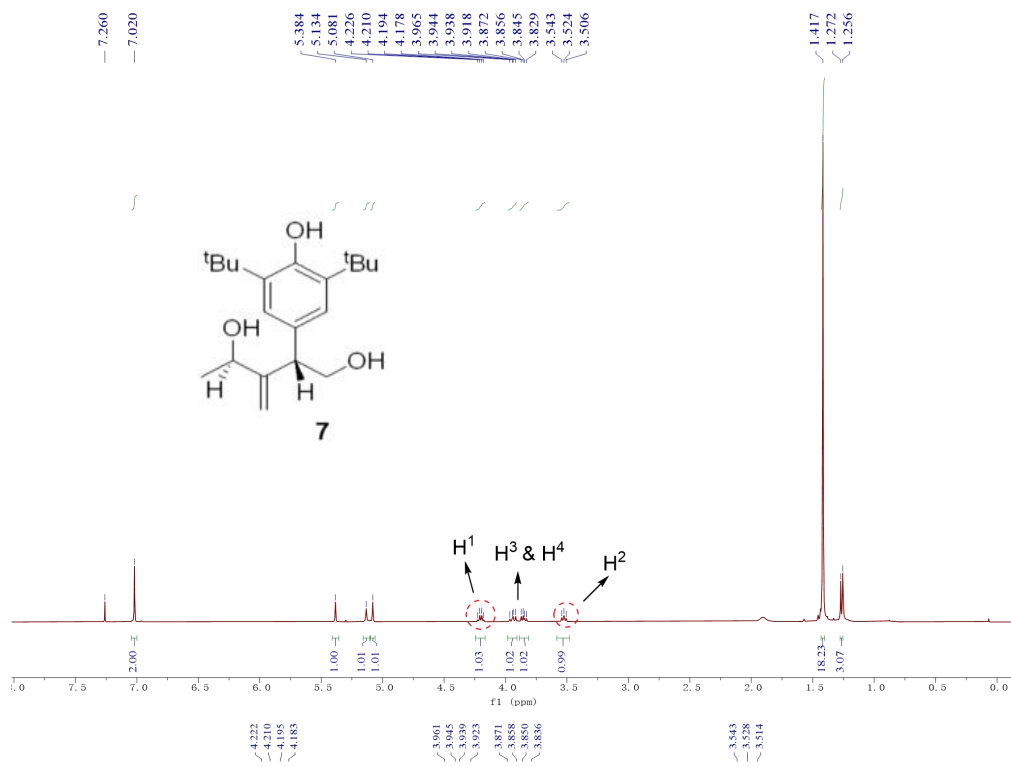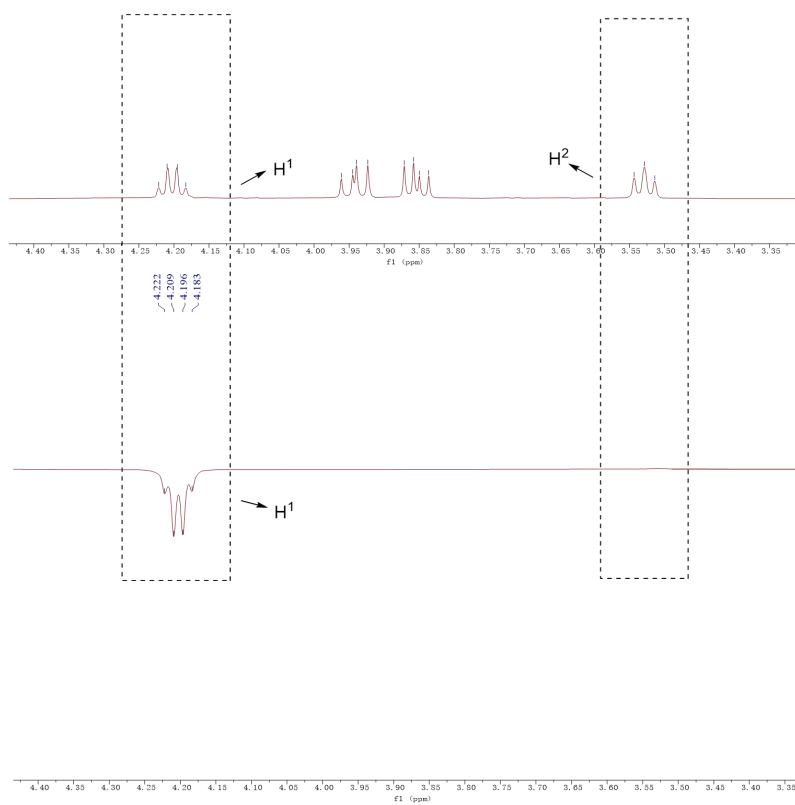

1D NOE of compound 7

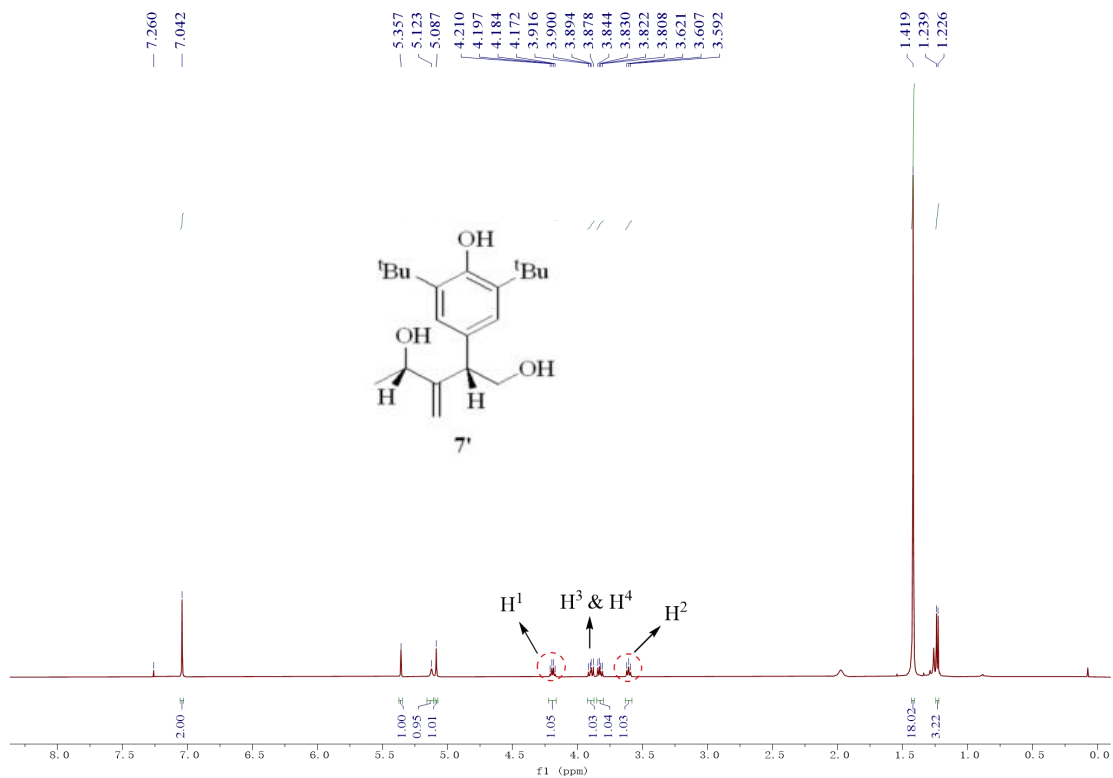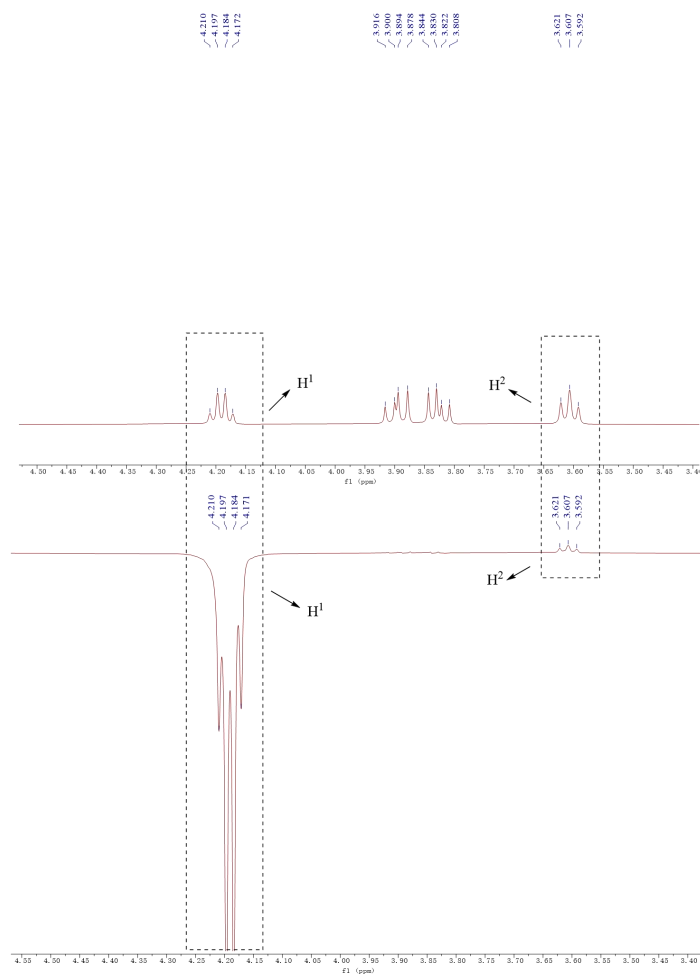

1D NOE of compound **7'**



## 7. Additives effects

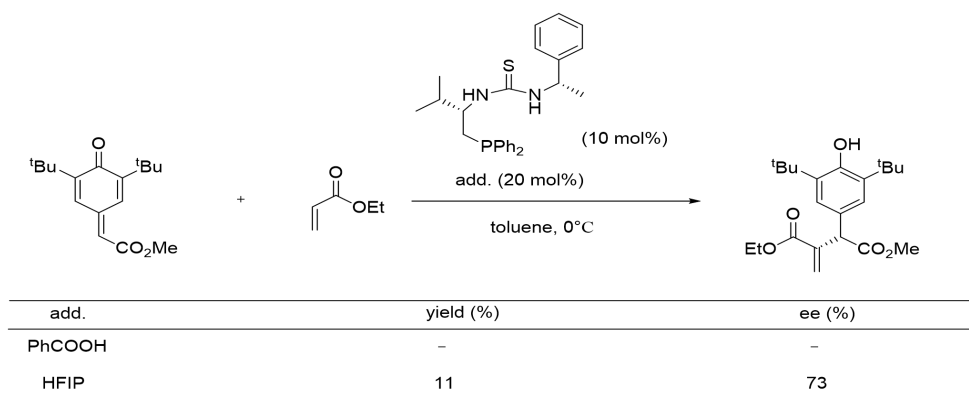

Enantiomeric excess was determined by HPLC with a Chiralcel AD-H column, Hexane/*i*PrOH = 95/5, 0.5 mL/min, 230 nm,  $t_{minor} = 9.285$  min,  $t_{major} = 8.661$  min.

### Racemic Sample of HFIP as additive

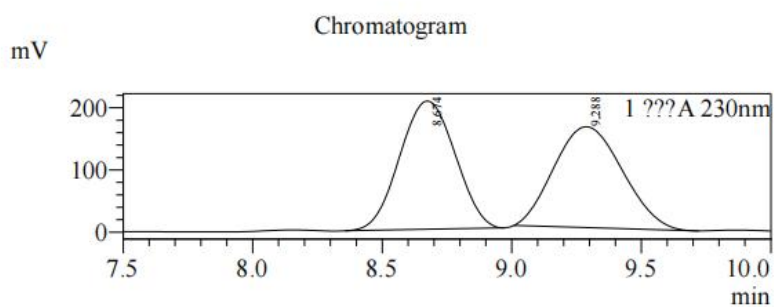

Peak Table

| Peak# | Ret. Time | Area    | Height | Area%   |
|-------|-----------|---------|--------|---------|
| 1     | 8.674     | 3067605 | 206278 | 50.708  |
| 2     | 9.288     | 2981992 | 162194 | 49.292  |
| Total |           | 6049597 | 368472 | 100.000 |

### Enantiomeric Sample of HFIP as additive

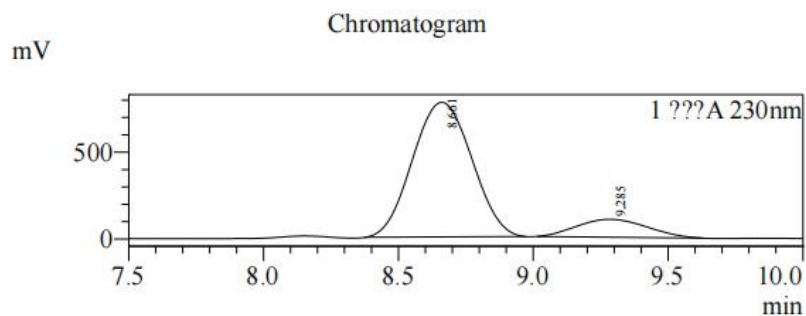

Peak Table

| Peak# | Ret. Time | Area     | Height | Area%   |
|-------|-----------|----------|--------|---------|
| 1     | 8.661     | 11835495 | 775076 | 86.415  |
| 2     | 9.285     | 1860567  | 102581 | 13.585  |
| Total |           | 13696063 | 877656 | 100.000 |

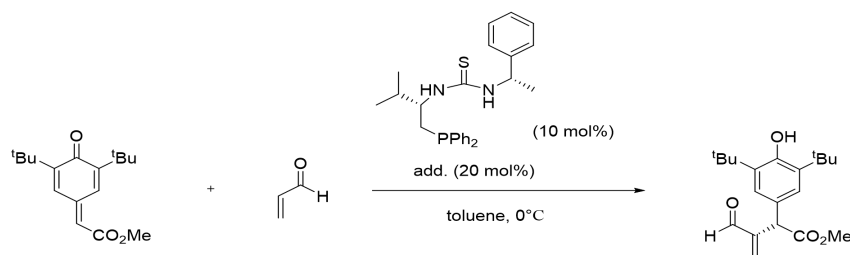

| add.   | yield (%) | ee (%) |
|--------|-----------|--------|
| PhCOOH | -         | -      |
| HFIP   | 45        | 86     |

Enantiomeric excess was determined by HPLC with a Chiralcel AD-H column, Hexane/PrOH = 99/1, 0.5 mL/min, 230 nm,  $t_{minor}$  = 24.694 min,  $t_{major}$  = 20.823 min.

### Racemic Sample of HFIP as additive

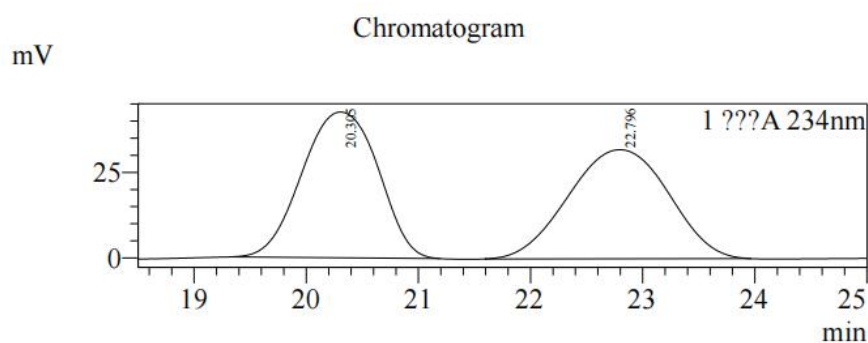

Peak Table

| Peak# | Ret. Time | Area    | Height | Area%   |
|-------|-----------|---------|--------|---------|
| 1     | 20.305    | 2008925 | 42579  | 50.376  |
| 2     | 22.796    | 1978897 | 31855  | 49.624  |
| Total |           | 3987821 | 74434  | 100.000 |

### Enantiomeric Sample of HFIP as additive

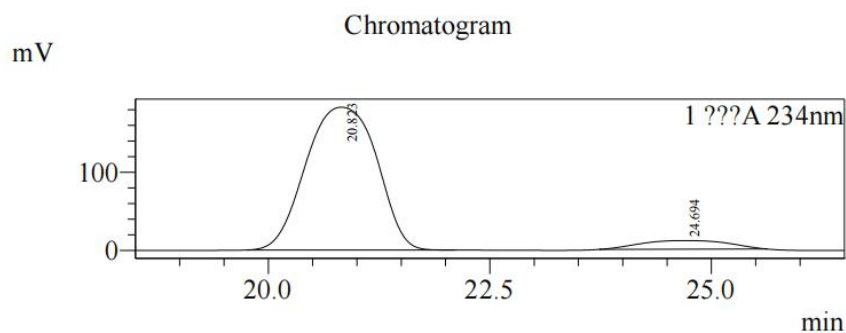

Peak Table

| Peak# | Ret. Time | Area     | Height | Area%   |
|-------|-----------|----------|--------|---------|
| 1     | 20.823    | 10192368 | 182771 | 92.985  |
| 2     | 24.694    | 768973   | 11070  | 7.015   |
| Total |           | 10961341 | 193841 | 100.000 |
